# Supplementary material for: Identifying the Role of Oxidative Stress-Related Genes as Prognostic Biomarkers and Predicting the Response of Immunotherapy and Chemotherapy in Ovarian Cancer
Source: Oxid Med Cell Longev. 2022 Dec 12;2022:6575534. doi: 10.1155/2022/6575534 (PMC9764017; doi:10.1155/2022/6575534)
Supplement: Supplementary 2 — Supplemental Table 1: detailed information of 34 prognostic OSRGs after univariate Cox regression analysis. [file 6575534.f2.txt]

id	HR	HR.95L	HR.95H	pvalue
ARL6IP5	0.762693347	0.62020485	0.937917757	0.010246655
C19orf12	1.250371052	1.053691669	1.483762105	0.010499746
CD38	0.645051083	0.502824919	0.827506522	0.000561029
DUOX1	1.280521972	1.075767025	1.524248728	0.005410407
FOXO1	1.220755563	1.023740902	1.455684872	0.02633422
FZD1	1.236045302	1.05212164	1.452121056	0.009935155
GCH1	0.751734451	0.603904956	0.93575103	0.010638273
GGT7	1.239137464	1.036023594	1.482072091	0.018904383
GLRX2	0.790023581	0.629517925	0.991452718	0.041947084
GPR37	0.80083696	0.66404367	0.965809728	0.020126443
GSKIP	0.729423395	0.575619176	0.924323774	0.00902059
HGF	1.500951366	1.10205002	2.044240246	0.009981633
IL18BP	0.711642301	0.570063265	0.888383442	0.002650028
JAK2	0.708952751	0.510048684	0.985423584	0.040622298
MAPK13	0.820069695	0.681192007	0.987261004	0.036135986
MELK	0.845283452	0.720305569	0.991945842	0.039491629
MICB	0.84618029	0.73920056	0.968642507	0.015437379
NAPRT	0.862242116	0.757853024	0.981010095	0.024375602
NDUFB4	0.784049358	0.644145166	0.954339841	0.01526597
OGG1	1.646381823	1.145183632	2.366933154	0.007104699
PDGFRA	1.169754494	1.002679628	1.364668771	0.046152485
PLA2R1	1.503550177	1.078456236	2.096202943	0.016152171
PRDX5	0.740712238	0.596340975	0.920035083	0.006659149
PRDX6	0.686836894	0.505613312	0.933015227	0.01623525
PXDN	1.169950137	1.032534701	1.325653579	0.013808803
PXN	1.292298362	1.03659422	1.611078881	0.022639966
SCGB1A1	0.895714187	0.820461868	0.977868608	0.013900851
SIGMAR1	0.756301571	0.608119815	0.940591068	0.012058053
SIRPA	1.15846738	1.001218597	1.340413246	0.04811782
SIRT2	1.2481864	1.000404506	1.557339337	0.049582764
SLC7A11	0.745730569	0.617434275	0.900685472	0.00232006
SRXN1	1.423753808	1.020023913	1.987281749	0.037848556
STAT1	0.799299903	0.692675775	0.922336768	0.002164512
TRPM2	1.245936639	1.001869281	1.549461731	0.048069577
