# Supplementary material for: Identifying the Role of Oxidative Stress-Related Genes as Prognostic Biomarkers and Predicting the Response of Immunotherapy and Chemotherapy in Ovarian Cancer
Source: Oxid Med Cell Longev. 2022 Dec 12;2022:6575534. doi: 10.1155/2022/6575534 (PMC9764017; doi:10.1155/2022/6575534)
Supplement: Supplementary 3 — Supplemental Table 2: detailed results of gene set enrichment analysis (GSEA). [file 6575534.f3.txt]

ID	Description	setSize	enrichmentScore	NES	pvalue	p.adjust	qvalues	rank	leading_edge	core_enrichment
hsa05332	Graft-versus-host disease	32	0.794722947838617	3.15683645381567	1e-10	3.9625e-09	2.30263157894737e-09	1292	tags=59%, list=6%, signal=56%	3002/3112/3134/3135/3107/3106/3109/3108/3123/3105/3122/3117/5551/3115/3118/3458/356/3113/3552
hsa05330	Allograft rejection	31	0.793020722821749	3.09321720701201	1e-10	3.9625e-09	2.30263157894737e-09	1287	tags=58%, list=6%, signal=55%	3002/3112/3134/3135/3107/3106/3109/3108/3123/3105/3122/3117/5551/3115/3118/3458/356/3113
hsa05320	Autoimmune thyroid disease	32	0.763746492379218	3.03379029783115	1e-10	3.9625e-09	2.30263157894737e-09	1287	tags=56%, list=6%, signal=53%	3002/3112/3134/3135/3107/3106/3109/3108/3123/3105/3122/3117/5551/3115/3118/1493/356/3113
hsa04940	Type I diabetes mellitus	37	0.734853325056199	3.01763901058574	1e-10	3.9625e-09	2.30263157894737e-09	1292	tags=54%, list=6%, signal=51%	3002/3112/3134/3135/3107/3106/3109/3108/3123/3105/3122/3117/5551/3115/3118/3458/4049/356/3113/3552
hsa05310	Asthma	21	0.685162163113351	2.37162685479605	3.55094584048144e-05	0.000250144406985026	0.0001453603560431	1888	tags=57%, list=9%, signal=52%	3112/3109/3108/3123/3122/3117/2207/3115/3118/3113/6356/959
hsa00190	Oxidative phosphorylation	103	0.670626854315148	3.4315338142792	1e-10	3.9625e-09	2.30263157894737e-09	2229	tags=57%, list=11%, signal=51%	4718/1347/1349/4717/4696/4715/1329/4712/4707/4726/29796/4700/1351/4706/525/4728/10975/10063/4729/4710/27089/6392/4709/4694/1337/4702/7381/7388/440567/1345/9550/4716/1340/8992/9377/51079/4708/1327/55967/51606/54539/1537/5464/7384/6389/4711/4725/4698/533/54205/9296/529/4714/479/4704/4697/4695/341947/4724
hsa03050	Proteasome	43	0.631818992932996	2.63561668400649	7.75562349549540e-09	1.75609474862289e-07	1.02047677572308e-07	2580	tags=47%, list=13%, signal=41%	5698/5683/5721/5696/5720/5699/5685/3458/5691/51371/5687/10213/5684/5694/5718/5713/5693/5695/5686/5700
hsa04612	Antigen processing and presentation	61	0.627844079682682	2.85205348876363	1e-10	3.9625e-09	2.30263157894737e-09	2611	tags=56%, list=13%, signal=49%	3112/6890/3134/3135/3107/3106/5721/3109/3108/3123/3105/6891/3303/3122/3117/3304/5720/3805/3115/3118/3458/3320/925/567/3113/3305/3821/972/1520/1514/3133/3127/926/3309
hsa05340	Primary immunodeficiency	32	0.508250140888749	2.01889548650654	0.000256987523164023	0.00133032357967274	0.000773058696472622	1888	tags=34%, list=9%, signal=31%	915/973/6890/916/3561/6891/29851/925/3932/3543/959
hsa04672	Intestinal immune network for IgA production	39	0.499881279603867	2.08467873374761	0.000103052582407155	0.000628224396597464	0.000365064816219679	1287	tags=38%, list=6%, signal=36%	3112/608/10673/6370/3109/3108/3123/7852/3122/3117/29851/5284/3115/3118/3113
hsa05150	Staphylococcus aureus infection	61	0.492488560381039	2.2371855724447	7.7798426300555e-07	1.12100459714891e-05	6.51422229789336e-06	1287	tags=31%, list=6%, signal=29%	1672/3112/25984/3861/717/1673/3109/3108/3123/3122/629/3426/3117/3880/3868/3115/3118/3866/3113
hsa04061	Viral protein interaction with cytokine and cytokine receptor	90	0.476292935638614	2.33259967540088	5.19390117399522e-09	1.26651282473576e-07	7.3597789914912e-08	1963	tags=31%, list=10%, signal=28%	6373/3627/4283/10563/6352/6355/6357/6354/3561/6846/6370/6363/6362/2833/7852/6364/8743/6375/6361/4049/1230/3560/1236/3606/6356/6347/1234/6351
hsa05322	Systemic lupus erythematosus	46	0.450447522038418	1.86304654695755	0.000162632310269454	0.000920615042061018	0.000534974704833732	2630	tags=39%, list=13%, signal=34%	3112/717/3109/3108/6632/3123/3122/3117/3115/3118/3458/3113/6634/959/712/3127/6737/716
hsa05416	Viral myocarditis	55	0.393678814064241	1.76282571841736	0.00129468105071796	0.00514572043020536	0.00299020778776669	1931	tags=36%, list=9%, signal=33%	3112/3134/3135/3107/3106/3109/3108/3123/3105/5881/3122/3117/5551/3115/3118/3113/54205/1525/959/841
hsa04623	Cytosolic DNA-sensing pathway	46	0.359894069519136	1.48851835271267	0.00924200043258353	0.0268318244008624	0.0155921277441505	1963	tags=30%, list=10%, signal=28%	3627/6352/9447/81030/23586/5440/3456/3606/5441/51728/834/90865/5437/6351
hsa03010	Ribosome	132	0.339467297506057	1.7377310561068	6.77946250064064e-06	6.32085180206789e-05	3.67308339817991e-05	2889	tags=34%, list=14%, signal=29%	29088/64979/64928/6224/51081/6182/100169760/28998/6231/51069/63875/6169/51121/51264/64960/6166/65003/79590/64983/64963/2197/29093/11222/54460/65008/11224/55168/6176/29074/51065/51023/6123/6133/64968/219927/64981/9553/10573/6170/200916/51021/6218/6155/6232/6210
hsa04260	Cardiac muscle contraction	71	0.33362236069523	1.49885145831597	0.0045769212179961	0.0143651883772749	0.0083476937274551	1536	tags=30%, list=7%, signal=27%	1347/1349/1329/29796/1351/10975/7137/27092/27089/1337/7381/7388/440567/1345/7134/1340/9377/1327/1537/7384/55799
hsa05323	Rheumatoid arthritis	85	0.307859699062646	1.44901826048872	0.00454028445531655	0.0143651883772749	0.0083476937274551	1815	tags=29%, list=9%, signal=27%	3112/6352/10673/3109/3108/3123/525/3122/6364/3117/4312/3115/3118/1493/9550/3458/8992/3113/3552/51606/3606/533/9296/529/6347
hsa04640	Hematopoietic cell lineage	85	0.306036263994064	1.44043580971898	0.00496465415263158	0.0152795666639244	0.00887904421778771	1359	tags=21%, list=7%, signal=20%	3112/915/952/914/916/924/3109/3108/3123/917/3122/3117/3115/3118/925/3113/3552/100133941
hsa04514	Cell adhesion molecules	132	0.268264787170731	1.37324583354938	0.00287934945403487	0.00960793449399006	0.00558322608815627	1287	tags=21%, list=6%, signal=20%	79679/3112/914/10686/9071/9074/6402/214/3134/3135/3107/3106/3109/3108/1366/3123/3105/3122/3117/29851/29126/3115/3118/1493/80380/925/201633/3113
hsa04650	Natural killer cell mediated cytotoxicity	101	0.263341188347877	1.33511749887536	0.0139476275817687	0.0394767673519703	0.0229401769436985	1333	tags=21%, list=6%, signal=20%	3002/10451/3135/3107/10870/3106/3105/5881/962/8743/5551/4068/7305/2207/259197/3456/3458/5058/3932/356/4277
hsa04723	Retrograde endocannabinoid signaling	119	0.260181708901449	1.32646383289234	0.015224807149341	0.041967511881227	0.0243875629394479	2053	tags=29%, list=10%, signal=26%	4718/4717/4696/4715/2567/4712/4707/4726/4700/5603/4706/4728/4729/4710/4709/4694/2568/4702/4716/2891/51079/4708/55967/54539/4711/4725/2787/4698/5579/4714/2792/4704/4697/4695
hsa04024	cAMP signaling pathway	187	-0.378871223673294	-1.31618198651905	0.0155323992264273	0.0424462978860126	0.024665788245234	5319	tags=36%, list=26%, signal=27%	476/482/1394/2740/2735/493/7253/268/5566/2033/5337/5020/5350/3991/134/818/196883/10257/3362/2550/9586/776/10411/5465/5894/51738/64764/4886/51196/107/4881/5348/9475/5602/1909/1908/2905/10000/6662/5291/114/7409/5732/113/7074/208/2737/7410/6548/64411/1387/5727/5295/4772/775/115/5141/112/5338/2906/478/477/109/90993/2353/3725/5293
hsa04020	Calcium signaling pathway	206	-0.388163461652472	-1.35543935740585	0.00466160111584199	0.0144875250364893	0.00841878426493652	6910	tags=46%, list=34%, signal=31%	5737/3357/55283/8911/2321/5567/2769/444/3363/552/113026/5155/5578/136/4233/185/5027/6915/2254/5979/6786/84812/2247/4915/493/5333/3082/2324/5331/5566/7424/56413/3709/23236/5350/85366/56848/9630/2260/3707/5336/818/3791/4803/196883/3362/5330/2252/776/8822/5530/219931/3274/5256/553/4923/51196/107/8912/1909/2905/9965/2246/5731/8536/57192/5582/114/7125/80228/624/113/80271/4485/5153/3269/2064/3708/775/8…
hsa05131	Shigellosis	215	-0.394489393966929	-1.3804476130012	0.00235409724928968	0.00834250105410357	0.00484787542576166	7505	tags=53%, list=37%, signal=34%	257397/5879/8915/6198/9266/6885/10552/10892/10241/7094/10097/2017/5970/51619/4193/81/4793/1432/199746/3661/11146/823/10325/4792/4790/10095/1399/643246/113026/5290/57521/1147/29110/9181/7335/5581/7186/596/3688/27128/87/2309/929/8517/84335/84812/9140/472/55054/8936/5333/3098/23118/7189/5331/824/10616/3709/3551/100132074/23236/7414/3099/55062/26100/10454/5336/440738/30849/22863/5330/23291/9564/8678/…
hsa04722	Neurotrophin signaling pathway	115	-0.403072308072873	-1.36445647010522	0.0144463918348751	0.0405266036429683	0.0235502428607652	8357	tags=56%, list=41%, signal=33%	91860/5605/6197/673/3265/4893/4914/5879/4145/10603/5908/5970/4793/1432/10782/4792/4790/1399/5290/596/2309/6464/9261/4915/10818/4214/3654/5170/2549/7189/5664/3551/5607/5336/818/5609/4803/9500/25970/4908/4215/25/5894/5781/2889/5602/25759/10000/2932/5291/11213/11108/208/5598/5295/10019/57498/6195/3725/4804/5293/6196/3667/5335
hsa04810	Regulation of actin cytoskeleton	199	-0.404567502919725	-1.41228905952222	0.0011897094895999	0.00489789491172945	0.00284619495119593	8156	tags=57%, list=40%, signal=35%	673/3265/4893/3695/2149/2264/5879/2248/10152/2261/5062/3685/54961/8395/10552/23191/26999/10097/10672/81/50649/8516/2846/10095/3673/221178/1399/3672/10297/5290/5155/3071/3984/3688/87/4627/2254/3645/2245/2247/8936/3689/3687/128239/8394/3675/7414/85366/3690/89846/5063/2260/85464/3691/10788/79784/10298/23365/2252/9564/8822/5894/5305/8515/3676/3679/4628/57121/1729/9475/369/9459/200576/23396/22808/9965…
hsa05207	Chemical carcinogenesis - receptor activation	166	-0.409085207382122	-1.4081371315721	0.00262147122213867	0.00903267801541261	0.00524894123425936	3144	tags=28%, list=15%, signal=24%	2252/9586/776/8822/164091/6256/5465/5894/79852/64764/10683/107/10000/5291/4609/5582/114/113/595/2946/3839/405/208/6777/28514/85315/6714/5295/775/4853/115/9314/2947/112/6195/2944/109/1956/90993/6776/2353/3725/5925/5293/6196/2475
hsa04910	Insulin signaling pathway	126	-0.410369246485335	-1.39518856364947	0.00821942142685	0.0241255240028838	0.0140194809912159	6492	tags=46%, list=32%, signal=32%	5567/6517/1399/5509/122809/8569/5290/57521/5792/6464/89801/2872/2997/3643/5170/10580/3098/9021/5566/3551/9322/3099/3991/7248/23265/23433/5256/5894/369/2319/79660/5770/2889/5602/31/25759/10000/867/2932/5291/3636/2645/5590/208/5565/5834/8660/32/5564/7249/5295/5507/5836/5293/5575/2475/2308/3667
hsa04936	Alcoholic liver disease	120	-0.411258409737633	-1.39329044894548	0.00612782196632451	0.0183256562577818	0.0106491444300575	7892	tags=57%, list=38%, signal=36%	257397/51422/79602/8310/6885/501/1375/5606/5970/2194/219/1432/5563/3661/37/4792/4790/1374/217/6416/1147/29110/9641/126/29896/2309/23411/929/721/8517/7187/719/3654/6932/23118/7189/84818/3551/23765/148022/79966/224/728/10454/5609/1499/10645/5465/7099/9020/125/23175/9663/5602/6934/31/10000/2932/720/595/208/5565/718/32/5564/126129/83439/2308/64900
hsa05202	Transcriptional misregulation in cancer	156	-0.412391054129196	-1.41210467757992	0.0022960423963014	0.00827097090485845	0.00480630884393236	4579	tags=38%, list=22%, signal=30%	604/904/2078/4208/6667/2115/4094/2119/2313/7030/5914/2138/51804/5090/905/4286/64332/6256/4616/51426/221037/6495/3065/4066/4297/2005/648/4609/8013/3684/26039/7704/3479/6935/8091/6929/8861/84444/7048/4298/3398/8864/5328/7709/894/861/5154/7849/3486/9915/1436/4299/5218/4804/860/2308/3480/3206/3205
hsa04014	Ras signaling pathway	209	-0.414688820060928	-1.44910795656138	0.000693573688244895	0.003053650821856	0.00177449408542188	8388	tags=59%, list=41%, signal=35%	598/91860/5605/2785/3265/4893/4914/2264/2791/5879/2248/1942/5863/2261/5062/7422/2784/5878/5908/10681/5970/2783/2002/255189/10125/2321/5900/5922/4790/5567/2113/3363/9462/5290/5155/5578/1147/29110/5966/4233/2254/6464/8517/9610/283455/2247/4915/8315/2786/3643/3082/2324/2782/2549/9771/5566/7424/3551/7010/5337/54331/5228/5063/5322/2260/5336/3791/4803/27/1946/115727/11186/4908/5924/10298/2252/8822/25/4…
hsa05135	Yersinia infection	133	-0.415073140373806	-1.41157039153435	0.00438523534298445	0.0141852726334892	0.00824314365220195	7505	tags=52%, list=37%, signal=33%	6885/8395/10552/10097/5606/5970/147179/1432/3661/4792/4790/10095/1399/5290/6416/1147/29110/7186/3984/3688/7456/8517/644150/3654/23118/7189/8394/3551/148022/10454/5609/5586/23365/9564/63916/114548/7099/4775/3676/9475/23396/5602/10000/2932/5291/8935/64283/7409/9815/8874/208/7410/10163/5585/4773/6714/5295/4772/5829/1793/6195/9138/3678/2353/3725/5293/6196/5335/2335
hsa05161	Hepatitis B	148	-0.417470383779962	-1.42831875158816	0.00269854735536429	0.00919827431882235	0.00534517020021223	6199	tags=44%, list=30%, signal=31%	5290/5578/6416/1147/29110/596/9641/1385/8517/7187/7046/4214/3654/23118/7189/7097/6773/3551/2033/148022/1654/10454/5609/9586/4088/57506/5894/7099/64764/4775/842/1642/369/5602/10000/5291/4609/5582/6778/898/3718/208/6777/7048/1387/3716/4773/6714/5295/4772/7042/4776/7040/7043/317/1959/90993/6776/2353/7297/3725/5925/5293/1960/3339
hsa04914	Progesterone-mediated oocyte maturation	91	-0.417489763311071	-1.38448813378034	0.0149760709359641	0.0416439867254441	0.0241995606075136	3882	tags=32%, list=19%, signal=26%	729597/285955/8697/196883/51343/51433/441273/5894/29882/107/369/5602/8379/10000/5291/64682/114/3479/113/208/6793/5295/115/112/6195/109/5293/6196/3480
hsa05165	Human papillomavirus infection	304	-0.424638643598224	-1.50828233083306	1.94329377514331e-06	2.56676719466846e-05	1.49156320460561e-05	4475	tags=46%, list=22%, signal=37%	10312/7448/1739/3672/10297/5290/1147/29110/5528/10474/9641/3688/131873/23545/1385/54361/7472/5986/3455/8517/10319/3915/472/7187/526/5649/3381/7482/5523/1108/6932/5566/5934/6773/3551/2033/3675/6908/148022/3690/3909/4855/3691/1857/1452/80326/7248/7474/3371/284217/1288/81029/1499/8313/545/4851/9586/4854/84552/5894/64764/8515/27175/3676/3679/5526/3910/3065/7059/6934/5728/10000/1101/8324/2932/535/5291…
hsa04270	Vascular smooth muscle contraction	116	-0.426891594115412	-1.44599967238678	0.00447371056296091	0.014324911600592	0.00832428866048016	4518	tags=38%, list=22%, signal=30%	5331/5566/3709/23236/85366/5322/79784/196883/800/23365/5330/9826/776/5894/553/4628/107/4881/5588/9475/369/1909/1908/3778/5592/5582/114/4882/113/8681/4660/54776/3708/775/72/115/112/9138/4629/183/109/2768/59/3710
hsa04010	MAPK signaling pathway	275	-0.428788649370566	-1.51916006825638	6.67087688180872e-06	6.32085180206789e-05	3.67308339817991e-05	6927	tags=60%, list=34%, signal=41%	6197/783/673/3265/4893/4914/23542/2264/5879/2248/1942/2261/5062/3727/7422/5534/5533/6885/1845/5908/80824/5532/5606/5970/1432/2002/994/255189/8986/10125/8911/2321/5922/4790/5567/1399/8491/1847/8569/408/5155/5578/6416/1147/8550/4791/93589/7186/84867/4233/4137/929/2254/8517/9261/5971/2872/2247/6722/4915/7046/10912/4214/3643/3654/3082/2324/9254/23118/7189/5566/7424/51701/9344/3551/7010/4208/10746/522…
hsa04371	Apelin signaling pathway	129	-0.430700572447634	-1.46410533218476	0.00237070882262136	0.00834250105410357	0.00484787542576166	8357	tags=59%, list=41%, signal=35%	91860/5605/4842/2785/3265/4893/2791/51422/6198/4899/4089/5346/2784/2770/10681/10672/2783/5563/100271849/5567/643246/111/5581/185/8862/146850/7046/2786/2782/5331/5566/3709/23236/4208/54331/5294/85366/56848/3991/440738/30849/196883/5330/4205/8678/4854/4088/5894/23533/107/22808/10014/10000/2788/55970/114/113/595/208/5565/4209/6548/5564/3708/6261/10365/9759/115/112/187/109/59/2475/3710/5054/1958
hsa05200	Pathways in cancer	485	-0.433527885997844	-1.55582706843242	2.10689657184743e-10	6.67886213275635e-09	3.88112526392947e-09	5066	tags=40%, list=25%, signal=31%	7046/2735/10912/4437/2786/7482/3572/23401/3082/2324/2782/6932/114112/7189/112398/5331/5566/7424/6773/3551/2033/3675/650/54567/23236/6667/5337/54331/9817/5228/3909/4855/2949/2260/7175/5336/818/1857/80326/5914/7474/284217/653689/4286/196883/1288/81029/4040/1499/115727/8313/11186/4851/23365/5330/9826/2252/8822/27436/6256/5292/4616/25/4854/4088/5894/3162/6789/842/8648/10683/51426/10018/57121/107/9475…
hsa04152	AMPK signaling pathway	110	-0.433562277770889	-1.46119832646883	0.00239485046032626	0.00834250105410357	0.00484787542576166	7927	tags=61%, list=39%, signal=38%	5529/51422/6198/79602/5525/6885/29904/1375/5519/2194/23216/5563/6517/1374/10890/5210/5290/57521/5528/5208/9230/1385/2309/23411/84335/6794/3156/2997/3643/5170/5523/948/92335/79966/3991/51719/7248/9586/10645/200186/64764/5526/31/10000/5291/1938/3953/3479/595/208/5565/5209/8660/81617/32/5564/7249/5295/5211/8408/126129/90993/5293/2475/2308/3667/3480
hsa04926	Relaxin signaling pathway	121	-0.433728378781614	-1.46900159478879	0.00283586064965979	0.0095634875100229	0.00555739768970283	4518	tags=50%, list=22%, signal=39%	4792/4790/5567/2769/5290/111/408/5578/6416/1385/6464/7046/2786/2782/5331/5566/7424/23236/54331/4322/2775/5609/196883/1288/5330/9586/3640/5894/64764/107/5602/25759/10000/5291/2788/55970/114/5590/113/208/7048/6714/5295/7040/115/1282/112/1287/109/1956/90993/2353/1284/3725/59/5293/1278/4313/1281/1277
hsa04630	JAK-STAT signaling pathway	130	-0.437568647740108	-1.48708292052214	0.00105056471807349	0.00444038687505729	0.00258033439526823	3095	tags=28%, list=15%, signal=24%	2690/316/5292/5894/5781/9655/10000/3590/51561/5291/3953/163702/4609/6778/30837/595/3718/208/6777/1271/1387/9466/3716/5295/3976/894/5154/10401/1956/6776/7297/5293/2273/5156/2475/5159/2057
hsa04140	Autophagy - animal	136	-0.441536525983636	-1.50292925141488	0.000586866831876122	0.00269618530006856	0.00156676881126348	6742	tags=49%, list=33%, signal=33%	5563/10325/23710/5567/3916/84938/643246/3091/5290/57521/8897/29110/596/1509/9451/84335/9140/6794/10533/55054/5170/55255/58476/2081/51100/7189/55102/5566/55578/440275/55062/64419/9110/26100/89849/440738/23192/7248/30849/22863/10645/8678/5894/5588/54541/5602/5728/22808/10000/9776/5291/79065/140775/53349/208/1612/8660/23130/7249/5295/3708/55626/8408/5293/2475/3667/3480
hsa05211	Renal cell carcinoma	65	-0.442382131108551	-1.41275488912763	0.0182854533819828	0.0487099892612482	0.0283056553900662	6456	tags=51%, list=31%, signal=35%	2113/1399/54583/3091/5290/5155/4233/3082/2549/112398/2033/5063/7030/201163/10298/5894/5781/369/2889/10000/7428/5291/7039/405/208/1387/5295/7042/7040/7043/9915/3725/5293
hsa04150	mTOR signaling pathway	147	-0.442620074902688	-1.51238528809285	0.000310071745987474	0.00153582411684421	0.000892476242562632	6199	tags=45%, list=30%, signal=32%	5290/57521/5578/1147/54361/7472/153129/9681/84335/57600/6794/526/7482/3643/5170/6446/92335/3551/1857/51719/80326/8140/7248/7474/201163/54468/96459/81029/4040/79726/9894/5894/9675/1975/54541/23175/9663/5728/10000/8324/2932/4041/5291/11211/2535/5582/2887/3479/83667/208/81617/8321/7475/1855/7249/5295/6195/8408/5293/6196/2475/7481/3667/3480/7483/64900
hsa04068	FoxO signaling pathway	123	-0.445375778248895	-1.50783870086296	0.000961477772167617	0.00417518429831691	0.00242622365002643	7020	tags=53%, list=34%, signal=35%	4193/114907/1432/5563/23710/6517/5290/1147/9455/1263/1030/2309/23411/1901/9140/472/6794/7046/10912/3643/5170/604/1454/6446/5934/51701/9454/3551/2033/100132074/80854/4616/4088/4303/5894/6789/10018/26260/369/5602/5728/10000/5291/847/10110/3479/595/208/5565/7048/8660/1387/5564/5295/10365/7042/7040/894/7043/10769/1956/5293/2308/3667/3480
hsa04015	Rap1 signaling pathway	196	-0.445616376958847	-1.5535883344296	2.70286971680569e-05	0.000204002309577953	0.000118546917403758	4903	tags=42%, list=24%, signal=33%	3643/3689/3082/2324/889/9771/5331/7424/25865/7010/23236/26037/2775/3690/5228/2260/3791/4803/196883/1499/1946/5330/2252/9564/8822/6494/10411/84552/2357/5894/57121/284/9693/23683/51196/107/83593/2889/9855/22808/1435/10000/9965/2246/5291/55740/5587/3684/5582/114/9223/3815/3479/7409/5590/113/7074/208/7410/83660/9732/64411/23094/6714/5295/5909/115/5154/112/57568/80310/109/1956/1436/7057/4804/5293/1969…
hsa04611	Platelet activation	111	-0.44669988577268	-1.5065564408441	0.00145275890833759	0.00554848884268694	0.00322425883270866	7458	tags=56%, list=36%, signal=36%	54518/2770/5908/7094/10672/5028/1432/255189/10125/7408/5567/3673/5290/111/3688/64805/51206/5739/6915/9002/6786/146850/2534/5331/5566/3709/23236/5294/85366/3690/8773/5336/196883/6916/23365/5330/23533/107/9475/10000/5592/5291/114/5590/113/208/8681/83660/6714/5295/3708/2909/115/112/9138/109/5293/7450/1278/3710/1281/1277
hsa04022	cGMP-PKG signaling pathway	146	-0.452311849418612	-1.5458954263596	0.000122154112553845	0.000704051885083073	0.000409128606639674	5319	tags=42%, list=26%, signal=32%	476/482/146850/6722/151/493/3643/5331/3709/23236/4208/3764/5350/5294/85366/8654/134/196883/140/5330/9586/776/4205/5530/5894/9569/64764/4775/23533/152/107/4881/9475/5138/1909/3778/10000/5592/114/4882/624/113/208/4209/8660/4773/4772/3708/775/4776/5997/115/112/2969/478/477/109/90993/2768/150/3710/3667
hsa04724	Glutamatergic synapse	98	-0.455876983129255	-1.52157749918806	0.00156237800627911	0.00589611699988664	0.00342626755762962	7562	tags=53%, list=37%, signal=34%	5534/5533/2784/2770/10681/5532/2783/255189/22941/5567/2744/111/5578/9455/57030/2900/2786/2782/7220/50944/5331/81539/5566/9454/3709/23236/5337/54331/2775/196883/5330/776/5530/107/2905/2788/5582/55970/114/85358/113/8681/1742/3708/775/115/112/5338/2906/109/2901/3710
hsa04911	Insulin secretion	70	-0.463025395316874	-1.49568310394996	0.00770423682110814	0.0228247016101989	0.0132635656044656	6635	tags=50%, list=32%, signal=34%	117/5567/111/5578/54795/1385/476/482/2740/5331/5566/23236/818/196883/3780/5330/9586/776/64764/107/6804/3778/5582/114/2645/113/775/115/112/478/477/109/90993/6616/3710
hsa04750	Inflammatory mediator regulation of TRP channels	87	-0.464071431999871	-1.53332225869224	0.00131483708153512	0.00514572043020536	0.00299020778776669	4518	tags=40%, list=22%, signal=32%	5331/5566/3709/51393/23236/5336/818/4803/196883/5330/107/5588/5602/5291/41/5582/114/3479/624/5732/113/3269/8681/59341/239/6714/5295/3708/115/112/109/3554/5293/3710/5335
hsa04012	ErbB signaling pathway	82	-0.464329131339064	-1.52940465749361	0.00438535242297144	0.0141852726334892	0.00824314365220195	3739	tags=35%, list=18%, signal=29%	5336/818/5609/1839/27/10298/25/5894/369/5602/25759/10000/867/2932/5291/4609/5582/7039/208/6777/2064/6714/5295/1956/6776/3725/5293/2475/5335
hsa00564	Glycerophospholipid metabolism	78	-0.466698262941789	-1.52652683822828	0.00427221779001464	0.0141072191607775	0.00819778632952371	5543	tags=47%, list=27%, signal=35%	8443/79143/23171/10390/9489/8760/3931/55224/9791/23646/5337/5322/5130/1609/11313/56261/160851/57678/1119/23175/9663/9926/23659/10162/81490/122618/375775/56894/129642/8525/8681/162466/56895/8527/5338/10908/64900
hsa04151	PI3K-Akt signaling pathway	311	-0.47098286117045	-1.67475473549115	2.65821960665675e-10	7.66050559372901e-09	4.45156393459265e-09	6245	tags=50%, list=30%, signal=35%	3672/5290/57521/5155/5578/1147/5528/5008/596/3688/131873/1385/4233/2309/3455/2254/8517/10319/3915/146850/6794/2247/23035/117145/5649/3381/4915/2997/2786/3643/5170/5523/3082/2324/2782/7097/6446/7424/5934/3551/3675/7010/11140/54331/5294/3690/5228/3909/2260/3691/3791/4803/7248/3371/284217/4170/5586/1288/1946/29941/4908/2252/9586/2690/8822/6256/200186/5894/672/7099/64764/8515/842/3676/3679/10018/5526…
hsa04912	GnRH signaling pathway	84	-0.471938451673136	-1.55721650619741	0.00138482273121798	0.00535352202190367	0.00311096248989919	4518	tags=40%, list=22%, signal=32%	5331/5566/3709/23236/5337/10746/818/5609/1839/196883/4215/5330/776/5894/107/5602/4216/114/113/8681/5598/6714/3708/775/115/112/5338/109/1956/3725/4323/4313/3710/1958
hsa04916	Melanogenesis	91	-0.474038329047536	-1.57201564972113	0.00059771242014488	0.00270678338837039	0.00157292742143389	4637	tags=44%, list=23%, signal=34%	6932/5331/5566/2033/23236/4157/2775/818/1857/80326/7474/4286/196883/81029/1499/5330/5894/64764/107/6934/8324/2932/11211/434/2535/5582/114/3815/113/1387/8321/7475/1855/115/112/109/90993/83439/7481/7483
hsa04920	Adipocytokine signaling pathway	63	-0.474610279685905	-1.51237558228672	0.00523926225393462	0.0159696743701661	0.00928006978176679	7289	tags=57%, list=35%, signal=37%	1375/2182/5970/4793/5563/4792/4790/6517/1374/1147/7186/51703/8517/6257/6794/2180/948/9021/3551/7133/10645/6256/5465/5781/5588/5602/10000/3953/208/5565/8660/32/5564/126129/2475/3667
hsa05144	Malaria	46	-0.475332123214916	-1.4639020199081	0.0174338936425257	0.0472354212365868	0.0274487754155826	4846	tags=37%, list=24%, signal=28%	948/3689/3082/7097/7412/7099/7059/3043/3383/7042/7040/7043/1311/7057/7058/7060/4035
hsa04072	Phospholipase D signaling pathway	133	-0.475443265051879	-1.61687560702495	4.101926963276e-05	0.00028267627116489	0.000164264809742174	4615	tags=41%, list=22%, signal=32%	2549/5331/8394/23236/5337/5294/56848/5336/7248/1609/196883/5330/10411/160851/5894/553/5781/57121/1759/23533/107/23396/22808/25759/10000/5291/114/3815/56894/113/208/8525/8681/1785/554/7249/5295/115/5154/112/56895/8527/5338/9265/2205/183/80310/109/1956/2768/5293/5156/2475/5159/5335
hsa04725	Cholinergic synapse	98	-0.477421543839685	-1.59348663261669	0.000358637241816636	0.00174904624085959	0.00101638084725362	6199	tags=47%, list=30%, signal=33%	5290/111/5578/596/1385/146850/2534/2786/2782/5331/5566/3709/23236/54331/5294/2775/3770/818/196883/3786/5330/9586/776/64764/23533/107/10000/5291/2788/5582/55970/114/113/208/5295/3708/775/115/3784/112/109/90993/2353/5293/3768/3710
hsa04713	Circadian entrainment	83	-0.479812254370202	-1.58031016456678	0.00131483708153512	0.00514572043020536	0.00299020778776669	4693	tags=42%, list=23%, signal=33%	2782/5331/5566/23236/54331/2775/818/196883/5330/776/107/8912/3762/2905/5592/2788/5582/55970/114/113/8864/3708/775/8913/6261/9722/115/8863/112/2906/109/2353/51655/3710/5187
hsa05210	Colorectal cancer	85	-0.480918052860726	-1.58822869387146	0.000482778833380946	0.00225060132620235	0.00130783739692981	3339	tags=35%, list=16%, signal=30%	1499/8313/4616/4088/5894/842/51426/10018/369/5602/6934/10000/2932/5291/4609/7039/595/208/7048/324/5295/7042/7040/7043/1956/2353/3725/5293/83439/2475
hsa04550	Signaling pathways regulating pluripotency of stem cells	128	-0.481402197784594	-1.63692779007429	2.60388018248859e-05	0.000201324394597288	0.00011699076558036	3904	tags=41%, list=19%, signal=33%	2260/659/91/3624/1857/80326/7474/5013/4090/81029/1499/8313/657/463/4088/5894/3625/83729/9869/6926/10000/8324/2932/648/5291/11211/7044/4609/2535/3479/6929/3718/208/324/3198/3398/8321/7475/1855/3716/5295/3976/9314/5460/3399/5293/4093/7481/3480/652/7483/3397
hsa05146	Amoebiasis	90	-0.484765853315591	-1.6055963237539	0.000400007075423002	0.00189257078968793	0.00109978378945837	6551	tags=52%, list=32%, signal=36%	4790/5567/2769/5290/5578/87/929/10319/3915/911/3689/7097/5331/5566/23236/7414/3909/9630/284217/1288/5330/913/909/7099/107/3910/5291/3684/5582/3908/3914/5295/7042/7040/1282/7043/1287/3554/3913/1284/5293/3912/1278/3911/1281/1277/2335
hsa04390	Hippo signaling pathway	146	-0.485153949189997	-1.6581419922939	3.79405791645627e-06	4.29541556970228e-05	2.4960907345107e-05	5181	tags=47%, list=25%, signal=36%	4092/7046/8463/7482/3689/268/60485/8200/6932/392255/1454/650/9113/659/1857/80326/7474/8994/81029/122786/1499/8313/11186/657/23291/84552/4088/6934/8324/2246/2932/654/8945/11211/4609/2535/84962/5590/595/7048/324/1742/3398/8321/9231/7475/1855/7042/7040/126374/894/85407/353500/154796/3996/7043/6591/7159/286204/26524/83439/2736/85409/7481/5054/652/7483/7003/3397
hsa04935	Growth hormone synthesis, secretion and action	104	-0.486747212199756	-1.63275959778219	0.000121335743037839	0.000704051885083073	0.000409128606639674	4553	tags=44%, list=22%, signal=35%	9021/5331/5566/3709/2033/23236/5336/196883/5330/9564/9586/2690/776/5894/51738/64764/107/5602/25759/10000/2932/5291/5582/114/3479/113/208/6777/8660/1387/5295/3708/775/115/112/3486/3726/109/90993/6776/2353/5293/2475/3710/3667/5335
hsa05221	Acute myeloid leukemia	66	-0.488626082155447	-1.56452607454973	0.0022835285133023	0.00827097090485845	0.00480630884393236	2956	tags=33%, list=14%, signal=29%	5292/5894/369/5467/6934/10000/5291/4609/3684/7704/3815/595/208/6777/8864/5295/861/1436/6776/5293/83439/2475
hsa05414	Dilated cardiomyopathy	83	-0.489010273156316	-1.61060476927765	0.000654188067536384	0.00292081151280329	0.00169730039761108	4709	tags=43%, list=23%, signal=34%	9254/5566/1756/3675/5350/3690/7168/3691/284217/196883/784/776/781/8515/3676/3679/107/114/782/3479/3908/113/775/7042/7040/115/7043/3693/112/7139/3678/183/109/3696/22801/1674
hsa05225	Hepatocellular carcinoma	161	-0.492245880806452	-1.69019323001813	6.36860252451106e-07	9.61355714414288e-06	5.58649344255356e-06	3739	tags=39%, list=18%, signal=32%	5336/1857/1452/80326/7474/653689/81029/4040/1499/8313/55193/55274/6602/4616/4088/5894/3162/51426/369/6934/5728/25759/10000/8324/2932/4041/5291/11211/10023/4609/2535/5582/7039/595/2946/208/7048/324/8321/7475/6601/1855/5295/6597/7042/8289/7040/7043/57492/2947/2944/1956/5925/5293/83439/2475/7481/1021/3480/7483/5335/3481
hsa04961	Endocrine and other factor-regulated calcium reabsorption	46	-0.493189726323157	-1.51889889469127	0.00931072771007844	0.0268318244008624	0.0155921277441505	5319	tags=43%, list=26%, signal=32%	476/482/493/5331/5566/23236/8218/5330/5745/1759/163/5582/624/161/1785/160/115/112/478/477
hsa04934	Cushing syndrome	141	-0.494099263680267	-1.68623369610639	4.28135521504133e-06	4.52396534389367e-05	2.62890232502538e-05	6500	tags=53%, list=32%, signal=37%	5151/5087/5567/10297/111/57552/1385/54361/1030/185/9101/7472/8622/6770/1394/7482/5929/6932/5331/5566/3709/23236/6667/818/1857/80326/7474/196883/79798/81029/1499/8313/3949/5330/9586/776/2516/64764/107/8912/6934/4297/8324/2932/11211/2535/114/898/113/595/405/324/8321/949/7475/1855/3708/775/8913/1586/115/112/183/109/1956/90993/51655/5925/83439/8085/7481/3710/1021/7483/3164
hsa05226	Gastric cancer	132	-0.495536866620274	-1.68388794773405	3.18204620605717e-06	3.87964864353893e-05	2.25448617838058e-05	5816	tags=52%, list=28%, signal=37%	10297/5290/596/54361/4233/1030/7472/2254/6464/6257/2247/7046/10912/7482/23401/3082/6932/2549/1857/1452/80326/7474/81029/4040/1499/8313/2252/8822/6256/4616/4088/5894/51426/369/6934/25759/10000/9965/8324/2246/2932/4041/5291/11211/10023/4609/2535/898/5915/595/208/7048/324/2064/8321/7475/1855/5295/7042/7040/7043/1956/5925/5293/83439/2475/7481/7483
hsa05212	Pancreatic cancer	76	-0.501027797845554	-1.63207538078173	0.000252109055542933	0.00133032357967274	0.000773058696472622	2953	tags=34%, list=14%, signal=29%	4616/4088/5894/842/51426/369/9459/5602/10000/5291/7039/595/208/7048/2064/3716/5295/7042/7040/7043/5338/1956/5925/5293/2475/1021
hsa04360	Axon guidance	172	-0.501830669608209	-1.73476392888048	2.69516884839285e-08	5.02569720553255e-07	2.92046160042569e-07	4090	tags=45%, list=20%, signal=36%	5063/2042/1947/85464/659/5336/818/57522/10509/7474/81029/1946/10298/23365/57556/5530/7869/25/2242/84552/6585/9353/5894/10154/223117/4775/5781/9860/2051/57689/9475/3983/64221/25791/2932/54910/3611/57715/5291/5362/55740/6608/2043/10505/10501/5590/55558/6091/8482/9901/23654/5727/4773/6714/5295/54437/84448/4776/54434/10500/23380/5364/5921/2048/1808/219699/1949/5293/1969/91653/5361/2050/6387/5335/9158…
hsa04520	Adherens junction	65	-0.50185259021911	-1.6026748157227	0.00117800511907547	0.00489789491172945	0.00284619495119593	7864	tags=69%, list=38%, signal=43%	5879/7454/4089/1500/6885/1495/81/5787/1459/4008/5792/87/4233/7046/2534/8936/3643/10580/1457/6932/51701/2033/7414/283106/2260/1499/2241/4088/5797/5770/9855/7082/6934/7048/2064/10163/1387/6714/5795/10810/6615/6591/1956/83439/3480
hsa04213	Longevity regulating pathway - multiple species	57	-0.502281333449476	-1.57808400835655	0.00201620454867771	0.00743182374338179	0.0043186755938629	6199	tags=58%, list=30%, signal=41%	5290/57521/111/2309/23411/84335/3643/1410/5566/1979/3306/196883/107/3065/10000/5291/847/114/3479/113/208/5565/8660/5564/5295/115/112/109/5293/2475/2308/3667/3480
hsa04921	Oxytocin signaling pathway	136	-0.502406034269505	-1.71012063681221	1.61454853177904e-06	2.22526906336503e-05	1.29311667304957e-05	4518	tags=43%, list=22%, signal=34%	5331/5566/3709/23236/4208/5020/5294/85366/2775/3770/5607/818/196883/784/5330/776/10645/5530/5894/781/4775/23533/107/4881/9475/3762/1938/8536/5582/114/782/4882/113/595/5565/8681/4660/5598/54776/5564/4773/6714/4772/3708/775/6261/4776/5997/115/112/109/1956/2353/1827/57118/3725/7226/3768/3710
hsa05222	Small cell lung cancer	91	-0.504578525518865	-1.67329367695355	5.681655029445e-05	0.000375225967569597	0.000218045971524753	6561	tags=56%, list=32%, signal=38%	4792/4790/3673/5290/1147/7186/596/3688/1030/9618/8517/6257/10319/3915/7187/10912/7189/3551/3675/3909/284217/1288/6256/4616/842/51426/3910/5728/7188/10000/5291/4609/898/5915/3908/595/208/3914/5295/7709/1282/317/1287/3913/1284/5925/5293/3912/3911/1021/2335
hsa04211	Longevity regulating pathway	81	-0.504652946102625	-1.65854601766446	0.000260189469841357	0.00133032357967274	0.000773058696472622	6551	tags=57%, list=32%, signal=39%	5563/4790/5567/5290/57521/111/1385/2309/143686/23411/84335/6794/3643/10919/5566/7248/79813/196883/9586/10645/64764/107/10000/9776/5291/847/114/3479/83667/113/208/5565/8660/5564/7249/5295/115/112/8408/109/90993/5293/2475/2308/3667/3480
hsa05231	Choline metabolism in cancer	89	-0.506289583203252	-1.67290606814379	8.05739476352912e-05	0.000500822380399751	0.000291030770612507	3585	tags=38%, list=17%, signal=32%	7248/5130/1609/6581/56261/160851/5894/1119/6584/23396/5602/10000/5291/57153/5582/208/8525/8681/10163/7249/5295/10810/5154/8527/5338/80310/1956/2353/3725/5293/5156/2475/5159/5335
hsa05215	Prostate cancer	93	-0.506483093519457	-1.68416988369273	7.02121910746937e-05	0.000445145291413558	0.000258676493433082	6199	tags=52%, list=30%, signal=36%	5290/5155/1147/596/1385/8517/7113/3645/5170/6932/2078/3551/2033/2260/2119/1499/9586/5894/64764/842/369/6934/5728/10000/2932/5291/3479/898/6935/7039/595/208/2064/5328/1387/5295/5154/80310/1956/90993/5925/5293/83439/5156/2475/2308/5159/3480
hsa05213	Endometrial cancer	57	-0.506606362877693	-1.59167252802036	0.00164592657218543	0.00613833792215036	0.00356702353105201	3339	tags=39%, list=16%, signal=32%	1499/8313/4616/5894/842/51426/369/6934/5728/10000/2932/3611/5291/4609/595/208/324/2064/5295/1956/5293/83439
hsa04310	Wnt signaling pathway	153	-0.507679296719247	-1.73785115760489	1.37042708919097e-07	2.28644940670282e-06	1.32866892303833e-06	4944	tags=50%, list=24%, signal=38%	7482/56998/23401/1457/6932/22943/5331/1454/5566/51701/23500/2033/23236/6425/283106/4007/818/1857/1452/80326/7474/81029/4040/1499/8313/7091/5330/23291/5530/4088/4775/9475/57680/147111/57216/5602/5467/6934/166336/8324/2932/4041/8945/11211/5176/10023/4609/2535/5582/595/7090/324/25805/1387/8321/7475/1855/4773/4772/2239/4776/894/85407/64840/7089/4919/3725/83439/85409/7481/6422/4920/7483/6423/6424/3436…
hsa00562	Inositol phosphate metabolism	71	-0.50855475987964	-1.64440419406536	0.000302692386965912	0.00152307121695546	0.000885065458964656	7130	tags=63%, list=35%, signal=42%	5286/9107/8776/22876/55586/113026/5290/8897/3612/84812/5333/64768/5331/8394/23236/5294/27124/64419/9110/3635/3707/5336/55361/9562/5330/5305/56623/8871/51196/8867/4952/200576/23396/5728/5287/5291/5298/3631/5297/3636/80271/3633/8396/5293/5335
hsa05205	Proteoglycans in cancer	191	-0.509284936136026	-1.77384464812491	2.10058443385052e-09	5.54904387942179e-08	3.22458136775299e-08	4967	tags=45%, list=24%, signal=34%	10818/7482/6385/5170/3082/2549/7097/5566/3709/288/3690/3236/2260/5336/818/1839/80326/3791/7474/81029/1499/23365/5894/7099/5781/51196/9475/369/1975/22808/10000/8324/867/5291/11211/6608/4609/2535/5582/2316/3479/7409/1634/7074/857/595/208/7410/4660/2064/6548/5328/54776/8321/7475/5727/6714/5295/3708/2317/7042/5829/7040/3693/9138/3678/1956/4060/2817/7057/5293/1278/2475/4313/7481/2318/3710/3480/7483/12…
hsa05220	Chronic myeloid leukemia	76	-0.512751308083112	-1.67026418491064	0.000116068560764568	0.000694221391742795	0.000403416050323723	2953	tags=36%, list=14%, signal=31%	4616/25/4088/5894/51426/5781/369/3065/613/25759/10000/867/5291/4609/595/208/6777/7048/5295/7042/7040/7043/861/6776/5925/5293/1021
hsa00310	Lysine degradation	55	-0.517770216117702	-1.61774888568388	0.00100527389950152	0.00430637602894572	0.002502459920523	3981	tags=51%, list=19%, signal=41%	10919/56950/93166/224/10157/80854/2639/79813/63976/64324/83852/79709/3030/9869/9739/4297/85007/8985/58508/55870/5351/84444/55904/2145/7799/23067/9757/8085
hsa04931	Insulin resistance	98	-0.517829307784662	-1.72835535090367	1.27929153388938e-05	0.000109604166552144	6.36916126402963e-05	3097	tags=39%, list=15%, signal=33%	9586/5465/200186/64764/5781/5588/79660/5770/5602/5728/9882/10000/2932/5291/57761/5590/208/5565/5834/8660/32/5564/9945/5295/8473/5507/22877/376497/5836/6195/183/90993/5293/6196/51085/2475/2308/3667
hsa01522	Endocrine resistance	93	-0.520334585991713	-1.73022920287723	1.91046591614308e-05	0.000151404423854339	8.79819829802734e-05	4475	tags=43%, list=22%, signal=34%	5566/54567/6667/4855/1839/196883/4851/4854/5894/10683/107/369/5602/25759/10000/5291/114/3479/10498/113/595/208/28514/2064/5469/6714/5295/4853/115/8202/112/109/1956/2353/3725/5925/5293/2475/4313/3480
hsa05206	MicroRNAs in cancer	189	-0.522195268331104	-1.81745489263451	1.42481596452737e-10	5.01851845283531e-09	2.91628998587474e-09	4381	tags=44%, list=21%, signal=35%	3551/2033/27086/1786/23414/3690/3236/407016/4855/7168/659/5336/9839/3371/4170/131405/1946/11186/10298/4851/8434/406976/406992/5292/25/4854/5894/672/3162/7431/90427/10018/406900/3065/54541/5728/10014/648/5291/4609/5582/1788/898/6935/8091/595/10642/324/4363/2064/8660/5328/1387/407014/5598/5295/6541/407011/9759/7042/4853/894/407019/5154/407040/406983/406896/3678/407010/6624/1956/7148/406984/7057/529…
hsa04930	Type II diabetes mellitus	39	-0.524209710045141	-1.56445246961453	0.00554829976440308	0.0167505811934836	0.00973385923579489	6486	tags=56%, list=32%, signal=39%	6517/122809/5290/5581/3643/389692/3098/9021/3551/3099/776/5602/5291/2645/5590/8660/5295/775/8913/5293/2475/3667
hsa04070	Phosphatidylinositol signaling system	89	-0.524210126821668	-1.73211997883499	1.59281852425138e-05	0.000132874597944129	7.72141943889175e-05	4831	tags=52%, list=24%, signal=40%	5333/8760/64768/5331/8394/3709/23236/64419/9110/3635/3707/5336/55361/1609/23262/5330/160851/5305/56623/9807/8871/51196/8867/4952/200576/23396/5728/5287/5291/117283/5298/5582/3631/5297/3636/80271/8525/3633/8396/5295/3708/8527/9677/5293/3710/5335
hsa04925	Aldosterone synthesis and secretion	87	-0.524429994995599	-1.73275088489574	9.06726539853659e-06	7.98423092037805e-05	4.63968258697048e-05	6184	tags=56%, list=30%, signal=40%	111/5578/5581/1385/185/476/482/6770/493/5331/5566/3709/25865/23236/3991/818/196883/3949/5330/9586/776/64764/23683/107/4881/5138/8912/3762/8536/5587/5582/114/113/747/949/3708/775/8913/221955/115/112/478/477/183/109/90993/57118/3710/3164
hsa05218	Melanoma	65	-0.527813671121889	-1.68558197085696	0.000227660957454162	0.00122319531377914	0.000710805843969284	3510	tags=38%, list=17%, signal=32%	4286/2252/8822/4616/5894/51426/369/5728/10000/9965/2246/5291/3479/595/208/5295/5154/80310/1956/5925/5293/5156/1021/5159/3480
hsa04350	TGF-beta signaling pathway	91	-0.52952008275083	-1.75600538167128	6.14535980254376e-06	6.28412599163346e-05	3.65174181814994e-05	6188	tags=56%, list=30%, signal=39%	10637/56963/151449/1030/79875/1874/285704/64388/4092/7046/4681/268/8200/392255/2033/650/6667/60436/659/91/3624/9765/4090/10468/657/4088/3625/83729/654/7044/4609/1634/9372/7048/57154/8646/25805/3398/1387/7042/7040/353500/7043/3399/7057/2331/4093/4052/652/2200/3397
hsa04933	AGE-RAGE signaling pathway in diabetic complications	99	-0.532910879717634	-1.78073535886089	4.08090465505889e-06	4.46085095052989e-05	2.59222618742398e-05	3493	tags=39%, list=17%, signal=33%	7412/1288/5330/5292/4088/1729/51196/7056/5602/10000/5291/5590/2152/595/208/6777/7048/3383/5295/4772/7042/7040/1282/7043/1287/183/6776/1284/3725/5293/1278/4313/2308/5054/1281/1277/5335/1958/2335
hsa04510	Focal adhesion	192	-0.533388486018543	-1.85892876858284	1e-10	3.9625e-09	2.30263157894737e-09	4486	tags=49%, list=22%, signal=39%	8394/7424/824/3675/7414/85366/3690/5228/5063/3909/3691/3791/3371/284217/1288/1499/10298/7791/9564/5894/8515/3676/3679/1729/9475/3910/2889/23396/7059/5602/5728/25759/10000/1101/2932/3611/5291/1280/5582/2316/3479/7409/3908/857/595/208/7410/4660/2064/83660/54776/1297/3914/1298/6714/55742/5295/2909/2317/5829/894/1282/3693/5154/1793/1287/3678/80310/1956/3696/7148/1311/3913/1284/7057/3725/5293/3912/745…
hsa05224	Breast cancer	136	-0.535109017700847	-1.8214370682173	2.292091164919e-08	4.84395266186216e-07	2.81484879902334e-07	5022	tags=50%, list=24%, signal=38%	10912/7482/23401/2324/6932/54567/6667/8600/4855/2260/1857/1452/80326/7474/81029/4040/1499/8313/4851/2252/8822/4616/4854/5894/672/8648/10683/51426/369/6934/5728/25759/10000/9965/8324/2246/2932/4041/5291/11211/10023/4609/2535/3815/3479/595/208/324/28514/2064/8321/7475/1855/5295/4853/8202/1956/2353/3725/5925/5293/83439/26508/2475/7481/1021/3480/7483
hsa01521	EGFR tyrosine kinase inhibitor resistance	78	-0.536783997769457	-1.75577079237758	3.34073914631501e-05	0.000240685070314059	0.000139863481006011	2839	tags=36%, list=14%, signal=31%	5894/10018/369/5728/25759/10000/2932/5291/5582/3479/4763/7039/208/2064/558/3716/6714/5295/2621/5154/80310/1956/5293/5156/2475/5159/3480/5335
hsa05214	Glioma	73	-0.539685205623428	-1.75339033944418	1.68064005665985e-05	0.000136605871272095	7.93824588165921e-05	2953	tags=36%, list=14%, signal=31%	4616/5894/51426/369/5728/25759/10000/5291/8536/5582/3479/7039/595/208/5295/5154/1956/57118/5925/5293/5156/2475/1021/5159/3480/5335
hsa04919	Thyroid hormone signaling pathway	115	-0.541941586117582	-1.834548513473	3.19496786870974e-08	5.62669341322771e-07	3.26970395920588e-07	6492	tags=63%, list=32%, signal=43%	5567/29079/116931/3091/113026/5290/2626/5578/5208/9611/54361/9969/6257/476/84812/482/5170/5333/10025/5331/5566/2033/23236/5350/7068/3690/4855/6567/5336/10499/1499/4851/5330/6256/4854/5894/842/8648/51196/8841/9862/3065/10231/9882/10000/2932/5291/4609/5582/2648/595/208/6548/1387/7067/5469/9968/7249/6714/5295/4853/5211/8202/23389/478/477/1827/5293/2475/2308/652/5335
hsa04392	Hippo signaling pathway - multiple species	28	-0.547276635934965	-1.54206531608404	0.0124533680577063	0.0355650240927288	0.0206670403992281	5443	tags=61%, list=27%, signal=45%	7004/25937/8463/60485/1454/79633/83937/9113/8994/122786/11186/84962/126374/9770/26524/7003/8642
hsa04540	Gap junction	77	-0.55108881875509	-1.79791620683154	3.6063049046682e-06	4.2340690917771e-05	2.46044194275608e-05	4527	tags=44%, list=22%, signal=35%	84617/5331/5566/3709/23236/10746/2697/5607/196883/5330/5894/107/113457/7082/5592/5582/114/7846/113/5598/6714/3708/115/5154/112/7280/80310/109/1956/5156/10382/3710/5159/347733
hsa04918	Thyroid hormone synthesis	62	-0.551435127591744	-1.75054637262649	4.20631635246254e-05	0.000283702613559708	0.000164861223220816	6184	tags=53%, list=30%, signal=37%	111/5578/1385/8458/476/482/493869/7253/50506/5331/5566/3709/23236/196883/5330/9586/64764/107/2878/5582/114/113/3708/115/112/7849/6528/53905/478/477/109/90993/3710
hsa04928	Parathyroid hormone synthesis, secretion and action	97	-0.554082800120988	-1.84729211805534	3.86091073424974e-07	6.11954351378583e-06	3.55610199207213e-06	4518	tags=51%, list=22%, signal=40%	5331/5566/3709/23236/4208/6667/5337/4322/8600/9935/2260/1839/196883/4040/5330/9826/9586/4205/6256/5894/64764/5745/107/632/369/4041/142680/5582/114/113/4209/11214/3708/115/5141/112/9138/5338/109/1956/90993/2353/2768/4326/860/4323/3710/10893/1958
hsa04927	Cortisol synthesis and secretion	57	-0.558318615351086	-1.75414378313135	6.50543745615143e-05	0.000420861974204082	0.00024456531790043	6500	tags=67%, list=32%, signal=46%	8911/5151/5087/5567/111/57552/1385/185/8622/6770/5331/5566/3709/23236/6667/196883/3949/5330/9586/776/2516/64764/107/8912/114/113/949/3708/775/8913/1586/115/112/183/109/90993/3710/3164
hsa05223	Non-small cell lung cancer	72	-0.559323148928748	-1.81178816591121	7.662984474316e-06	6.94047450959478e-05	4.03314972332421e-05	3289	tags=42%, list=16%, signal=35%	11186/27436/6256/4616/5894/6789/842/51426/369/83593/10000/5291/238/5582/5915/7039/595/3718/208/6777/2064/5295/3800/1956/6776/5925/5293/3798/1021/5335
hsa04923	Regulation of lipolysis in adipocytes	47	-0.563764855283297	-1.74016332207992	0.000399493211021003	0.00189257078968793	0.00109978378945837	4953	tags=51%, list=24%, signal=39%	7253/3643/5566/3991/134/196883/57104/4886/107/4881/10000/5592/5291/114/113/208/8660/5295/115/112/2167/109/5293/3667
hsa04330	Notch signaling pathway	58	-0.579168840678038	-1.82530881333318	2.84843081031898e-05	0.000209988969039795	0.000122025799707668	4481	tags=52%, list=22%, signal=41%	5664/2033/54567/6868/8650/4855/1857/7091/4851/4854/113878/10683/196403/3065/23220/2648/7090/9794/28514/1387/1855/83464/342371/55534/4853/7089/26508/1840/9612/9253
hsa05217	Basal cell carcinoma	59	-0.580027132127217	-1.8327756048758	6.72348817718038e-06	6.32085180206789e-05	3.67308339817991e-05	5056	tags=56%, list=25%, signal=42%	2735/10912/7482/6932/650/1857/80326/7474/81029/1499/8313/4616/51426/6934/8324/2932/11211/6608/2535/8643/324/2737/8321/374654/7475/5727/1855/51684/83439/2736/7481/652/7483
hsa00514	Other types of O-glycan biosynthesis	42	-0.580882530539613	-1.75871787240124	0.000227439771574681	0.00122319531377914	0.000710805843969284	5068	tags=52%, list=25%, signal=40%	63917/10585/152002/50614/6480/56983/29954/79709/2590/117248/11227/6487/8985/374378/79623/23509/84620/8473/51809/727936/23275/55568
hsa00515	Mannose type O-glycan biosynthesis	18	-0.59584167983513	-1.54373297722247	0.0180067465450559	0.0483740563964637	0.0281104428669472	6167	tags=67%, list=30%, signal=47%	11041/55624/84892/10585/27087/2218/79147/29954/9486/6487/148789/84197
hsa04512	ECM-receptor interaction	80	-0.600066279096617	-1.9698463561618	2.66006216674696e-08	5.02569720553255e-07	2.92046160042569e-07	2760	tags=46%, list=13%, signal=40%	8515/3676/3679/3910/7059/1101/1280/3908/1297/3914/1298/1282/3693/1287/3678/3696/375790/7148/1311/3913/1284/7057/3912/7450/1278/1292/1299/1291/9900/7058/22801/1293/3911/7060/1277/2335/3339
hsa04340	Hedgehog signaling pathway	47	-0.629518944861426	-1.94312534407953	2.72287090325289e-06	3.45260030532466e-05	2.00632592871265e-05	6166	tags=77%, list=30%, signal=54%	408/596/55733/23432/11127/339745/2735/84455/1454/5566/1455/53944/1452/23295/23291/132884/2619/1456/2932/8945/84976/6608/23288/8643/595/57154/2737/50937/374654/5727/894/2121/51684/2736/91653/1954
hsa04974	Protein digestion and absorption	84	-0.639678302467948	-2.11069390029134	1e-10	3.9625e-09	2.30263157894737e-09	2661	tags=43%, list=13%, signal=37%	1303/91522/8645/50509/1306/1305/1280/1297/1298/1294/206358/1282/3784/1300/1287/478/477/80781/1284/7373/1278/85301/1292/1299/1291/1293/1301/1281/1295/1290/2006/1277/1296/1307/1289/136227
hsa00532	Glycosaminoglycan biosynthesis - chondroitin sulfate / dermatan sulfate	20	-0.645605164104761	-1.70946186536581	0.00126827605478698	0.00514572043020536	0.00299020778776669	7160	tags=95%, list=35%, signal=62%	56548/11285/113189/50515/55790/337876/166012/54480/55501/22856/55454/126792/79586/29940/64132/10090/9469/64131/51363
hsa00534	Glycosaminoglycan biosynthesis - heparan sulfate / heparin	23	-0.674913108557173	-1.84343906033452	0.000210852140845717	0.00117263383593144	0.000681424277894746	4117	tags=61%, list=20%, signal=49%	9653/2134/90161/2132/126792/26035/9953/64132/2137/9955/2135/9394/64131/3340
