# Supplementary material for: Identifying the Role of Oxidative Stress-Related Genes as Prognostic Biomarkers and Predicting the Response of Immunotherapy and Chemotherapy in Ovarian Cancer
Source: Oxid Med Cell Longev. 2022 Dec 12;2022:6575534. doi: 10.1155/2022/6575534 (PMC9764017; doi:10.1155/2022/6575534)
Supplement: Supplementary 4 — Supplement Table 3: signaling pathway analysis in regard to ARL6IP5. [file 6575534.f4.txt]

ID	Description	setSize	enrichmentScore	NES	pvalue	p.adjust	qvalues	rank	leading_edge	core_enrichment
hsa03430	Mismatch repair	23	0.607899829106807	1.77459733293118	0.00163532853855522	0.00626091715971325	0.00400204913055291	4579	tags=43%, list=22%, signal=34%	5424/9156/5984/3978/5111/2956/5425/4436/5982/5985
hsa00670	One carbon pool by folate	19	0.586018187977372	1.63475839827091	0.0105637835613949	0.0320790124662543	0.0205052679463098	5135	tags=53%, list=25%, signal=40%	10841/6472/4524/25902/7298/471/10840/275/4548/1719
hsa03030	DNA replication	36	0.563642775120686	1.8573099258705	0.000915034300477839	0.00373921424022426	0.00239014807532223	5165	tags=53%, list=25%, signal=40%	4176/5426/5424/10535/1763/4171/5984/3978/4172/5111/4174/5425/4175/5982/2237/23649/5985/5427/4173
hsa03440	Homologous recombination	37	0.561192088895293	1.87013676624678	0.000453560937930013	0.00194972299291993	0.00124628501058008	3228	tags=35%, list=16%, signal=30%	8438/672/5424/641/7516/146956/29086/5893/5888/83990/5425/7517/11073
hsa03460	Fanconi anemia pathway	47	0.52367832520352	1.80624555844263	0.000412439677672104	0.00182023377745955	0.00116351403806446	3847	tags=34%, list=19%, signal=28%	2175/672/641/55215/116028/146956/2189/29089/2178/5980/9894/5888/83990/84464/2176/2177
hsa00270	Cysteine and methionine metabolism	44	0.462429810820592	1.5670486136959	0.0092680642841049	0.0289408422456483	0.0184993140129601	4979	tags=34%, list=24%, signal=26%	26227/1786/1788/6723/3948/1789/23743/2805/4143/3945/191/875/4548/4191/2729
hsa04330	Notch signaling pathway	58	0.441863847815172	1.59505338608999	0.00322105160799926	0.011588783502693	0.00740768161565047	3623	tags=34%, list=18%, signal=28%	10683/23493/4854/9612/1840/11317/3065/9253/3066/28514/1855/2648/5664/7090/113878/1857/196403/1387/1856/5986
hsa03008	Ribosome biogenesis in eukaryotes	74	0.441693559671507	1.65739422132461	0.00137901006283984	0.00541034458108466	0.00345835350865961	6827	tags=57%, list=33%, signal=38%	2091/345630/54913/6949/3692/57455/1460/55131/10607/54552/55341/55226/10775/29102/780852/23195/1457/10528/283106/65083/10799/10556/10436/10248/51367/9790/84128/55127/4931/23560/92856/83732/7514/28987/84135/166378/10482/5822/29107/22803/54433/1459
hsa03013	Nucleocytoplasmic transport	101	0.435117729839032	1.74971920249729	0.000176436358939939	0.000846383113175647	0.00054101766814535	6474	tags=53%, list=32%, signal=37%	57510/57122/23225/100101267/79711/55705/9883/8086/79228/1434/10921/9631/1917/5976/9670/23534/11260/7175/22985/65110/30000/7919/23511/5905/4928/5411/8021/348995/9972/22916/10250/23636/9984/9939/55308/3838/8563/59343/55110/26019/25909/7514/8480/5903/79023/3843/23165/9688/11269/10482/65109/23633/29107/10526
hsa04110	Cell cycle	126	0.434161173686961	1.80066309638353	1.39123178842972e-05	8.68863626358937e-05	5.55387466681973e-05	4276	tags=42%, list=21%, signal=34%	9700/1869/1028/4176/9088/898/991/1870/8317/10459/995/9232/4171/7709/994/699/5347/6502/3065/4172/701/891/3066/1874/8318/9133/8900/5111/8243/7272/7029/993/1111/27127/4088/4174/51433/85417/1387/5933/8379/4175/4998/51434/983/1029/51343/5591/990/23594/1019/10926/64682
hsa04911	Insulin secretion	70	0.415714504029985	1.54637796766234	0.00365930634669108	0.0128854297952633	0.00823651260565406	1628	tags=21%, list=8%, signal=20%	2645/117/482/6616/6804/477/5582/3767/111/9586/10242/3780/3710/114/2864
hsa03040	Spliceosome	137	0.365865622432896	1.54349121950827	0.00175130088194931	0.00651326507781149	0.00416335277672161	7376	tags=53%, list=36%, signal=34%	10523/23020/56259/101954268/6636/199746/6628/25804/51691/6626/8175/25766/10262/56949/23450/6635/8449/2521/26121/9092/24148/22985/3178/6429/144983/10915/9785/84991/7919/9343/10713/9410/57461/4670/51340/8683/6625/23350/22916/27339/6631/6100/9984/9939/3192/26831/3310/55110/6633/10594/57819/10084/23658/6627/9879/26870/10946/10291/6432/6431/10907/58517/8896/6637/6434/10465/6426/3306/51729/10450/10992/…
hsa05224	Breast cancer	136	0.342617980737078	1.4395606034096	0.00657451871167006	0.0215461949857702	0.0137725717670212	1778	tags=20%, list=9%, signal=18%	10683/8822/7475/1869/80326/7481/83439/9965/672/23493/3480/1870/7855/2535/8817/10023/7482/4854/2248/4791/89780/23401/81029/2475/4040/28514/1855
hsa05206	MicroRNAs in cancer	189	0.316074581700592	1.39432502383565	0.00588299345914425	0.0196694023735025	0.0125729046814247	3642	tags=29%, list=18%, signal=24%	8091/407014/1869/5582/10642/3925/5335/672/898/1870/995/6624/1786/1788/113130/406984/994/4363/3236/1944/406983/4854/406992/10298/2146/131405/3065/89780/1789/3066/5292/2261/1945/2475/9493/406976/442891/406900/993/3667/3265/407017/7422/90427/9759/1387/7148/406903/442898/406896/2064/5605/1029/8651/4194
hsa05165	Human papillomavirus infection	304	-0.280674696499921	-1.28558293201518	0.0160970862743908	0.0463316135375943	0.0296156919098631	2845	tags=23%, list=14%, signal=20%	5700/3690/537/3659/5747/3678/245973/9368/5525/51382/5934/526/5594/8322/3912/5527/5295/998/5567/1291/1292/3672/3455/3134/528/3454/529/3133/5734/84441/131873/3107/9550/7157/6655/523/5159/5925/3676/8992/3371/7477/7098/3909/3685/3910/3381/10000/8503/356/3688/3918/5521/3106/3673/8323/8321/90993/3691/1026/355/7057/6696/8325/1293/1277/1278/22801/2335/7058/3694
hsa04080	Neuroactive ligand-receptor interaction	236	-0.310332347555401	-1.38425888011471	0.00920077609615184	0.0289408422456483	0.0184993140129601	1643	tags=19%, list=8%, signal=17%	552/5734/5027/2568/2908/728/3357/6869/9934/185/2690/150/1910/8698/2149/140/1906/187/6343/1901/147/2922/10203/3269/10800/1134/5031/66004/5724/27334/2899/2357/57152/2359/5733/1902/10161/1909/719/53829/5021/718/5732/3001
hsa05131	Shigellosis	215	-0.312564089178237	-1.37523174729535	0.0117567277639103	0.0344378485827815	0.0220130626972145	5055	tags=38%, list=25%, signal=29%	10892/6198/3708/1398/81873/7336/23048/4792/10097/7416/8678/5289/1432/3709/71/8976/10095/5580/9267/8717/87/10241/58484/7189/4636/3611/1956/103910/9844/5333/60/5595/10094/4790/7314/8915/92610/7132/823/5601/7323/5747/10670/10096/3678/8767/5481/5217/5594/29895/81631/5295/998/55062/831/387/5603/10627/382/114548/113026/3059/4615/7157/824/27128/837/10000/3553/8503/10092/3576/3688/29108/834/7100/929/960/…
hsa04014	Ras signaling pathway	209	-0.315600157958674	-1.3826766019209	0.00741542853457916	0.0238301635431622	0.0152325103265244	3855	tags=33%, list=19%, signal=27%	5322/5878/1956/805/5923/25780/3791/5595/4790/5908/4909/5155/115727/5601/801/22808/25759/4915/22821/5578/1942/5924/3363/7535/5868/9846/5881/5594/5295/7039/998/5063/387/6237/5567/56034/7424/3082/5906/382/2113/59345/284/6655/2788/2791/5159/80310/4254/64926/9610/55970/5320/10000/8503/356/2246/2790/5156/54331/26279/2252/23179/5579/5880/1436/83593/51806
hsa05200	Pathways in cancer	485	-0.318673859450834	-1.52675777168883	2.7428502590779e-05	0.000156531626854273	0.000100056788035328	2932	tags=27%, list=14%, signal=23%	115727/862/3320/329/5601/801/5747/2846/6774/5578/367/221357/1030/7043/3458/57121/5881/3717/5594/8322/3912/7040/5295/7039/998/27113/3572/387/5567/1647/4312/4149/7424/7852/2771/3082/3455/26060/840/3454/3601/3592/650/5468/3569/3091/817/5734/3594/6775/2113/330/7157/59345/4258/185/6655/2788/2791/4609/5159/5925/3162/3574/1728/652/2776/4254/3563/1910/7477/3909/3685/3910/55970/3597/2149/2034/1906/4616/10…
hsa04015	Rap1 signaling pathway	196	-0.328107452557648	-1.42897072929784	0.00654171663529998	0.0215461949857702	0.0137725717670212	2848	tags=24%, list=14%, signal=21%	801/3690/22808/2846/5578/1942/5217/57121/5881/5594/5295/998/387/6237/5603/56034/7424/2771/3082/5906/5587/284/3684/5159/80310/2776/7409/4254/2149/10000/8503/3688/2246/5156/2252/5579/2357/5880/3683/1436/7057/3937/54518/83593/1902/51806/3689/10451
hsa05130	Pathogenic Escherichia coli infection	184	-0.345535935848686	-1.48699246602202	0.00166453386723494	0.00626091715971325	0.00400204913055291	3565	tags=34%, list=17%, signal=28%	60/5595/7009/10802/10094/4790/7122/51135/10006/6188/55845/55930/7132/8797/5601/2846/10096/4645/9368/57121/5594/998/5063/387/5603/10810/840/382/5010/114548/3569/4690/3059/4542/9076/4615/9871/10972/4641/7277/27128/837/2149/7456/3553/356/10092/3576/3688/29108/2353/9071/834/3071/7100/8743/355/10686/7099/3606/2212/1902
hsa04072	Phospholipase D signaling pathway	133	-0.347308944703521	-1.43583032380841	0.0109881963809011	0.0327666036223267	0.0209447839977347	3141	tags=28%, list=15%, signal=24%	5737/183/5155/26052/22808/2846/25759/5578/23533/57121/9846/5594/5295/387/6237/56034/2185/382/552/1606/8877/185/6655/5159/5294/80310/4254/27128/2149/10000/8503/3576/5156/2207/1902/10161/2205
hsa05208	Chemical carcinogenesis - reactive oxygen species	192	-0.350501873768025	-1.52459195441663	0.00129880452106793	0.00524273532284738	0.00335121577323048	4846	tags=40%, list=24%, signal=31%	6389/7388/9446/4792/7416/27089/1432/440567/1950/7384/5580/2885/8644/1572/4696/1351/4706/1956/6391/873/4694/291/4780/4711/5595/4718/4790/292/1535/4259/7385/29796/4707/4697/10975/1346/1347/5601/1836/4724/5747/4712/2053/4702/221357/4217/7381/2052/5594/1345/5295/50507/1349/5603/253152/847/653361/4700/3082/4715/3091/6392/1537/5587/4258/6655/6648/3162/1728/10000/8503/4688/2353/196/4257/1545
hsa04915	Estrogen signaling pathway	112	-0.358871520939206	-1.4305920398924	0.00937959256776272	0.0290153751395277	0.0185469562825411	2318	tags=36%, list=11%, signal=32%	2852/3709/2550/1509/2773/115/5580/1386/2885/9568/1956/805/5595/3762/3320/801/25759/5594/5295/7039/3312/5567/3880/2771/1839/3861/6655/2776/3866/10000/8503/2289/2353/3868/90993/9166/4318/51806/4313/25984
hsa05161	Hepatitis B	148	-0.361321217502797	-1.52150558115708	0.00345281044885116	0.0122890350383842	0.00785529032506036	4280	tags=37%, list=21%, signal=30%	114609/1386/841/2885/3716/836/4214/9134/7189/843/4089/5595/4790/51135/7046/1643/5601/537/6774/5578/7043/3717/5594/7040/5295/10971/23586/5603/64135/2185/3454/1959/3569/6775/4615/7157/6655/4609/5925/7534/7098/10000/8503/7097/356/3576/637/2353/7048/90993/5579/1026/355/4318/7099
hsa05132	Salmonella infection	244	-0.363642316469696	-1.62838879341714	9.31166315387864e-05	0.00046699401574755	0.000298507861870751	4874	tags=43%, list=24%, signal=33%	81873/8772/4792/10097/3839/7879/5289/1781/1432/71/9842/79861/8976/23191/10095/114609/841/9267/10640/8717/84516/836/2317/58484/7189/4636/51143/5878/7295/103910/9844/10671/60/5595/10094/4790/51135/10006/64746/6188/55845/1499/83657/7132/8797/3320/79026/329/5601/112574/10096/8767/79443/5217/5868/338382/11035/5594/113146/29895/6990/998/79792/57381/5063/387/6237/5603/10810/197259/10627/840/382/114548/8…
hsa04068	FoxO signaling pathway	123	-0.365110920919559	-1.48666921696682	0.00533742994426801	0.0182132918716774	0.0116421423635146	3257	tags=30%, list=16%, signal=25%	7046/11345/116986/5601/6774/1030/7043/5934/5594/7040/5295/5603/23710/1647/901/5562/847/1263/3569/6655/6648/10365/8698/4616/10000/6446/8503/356/3586/1901/10769/7048/1026/8743/80854/3575/114907
hsa04151	PI3K-Akt signaling pathway	311	-0.376796989622584	-1.72636639233218	2.95821217265502e-06	1.99830250846696e-05	1.27733758690367e-05	2769	tags=30%, list=13%, signal=27%	3690/5747/2846/4915/3678/5578/1942/374/23533/5525/57121/5934/1977/3717/5594/3912/5527/5295/118788/10971/7039/7533/56034/1291/5562/7424/1292/3672/3082/3455/3454/3569/5008/131873/7157/59345/284/6655/2690/2788/9180/2791/4609/5159/5294/3574/80310/7534/3676/4254/3563/3371/3909/3685/54541/3910/3381/55970/2149/10000/6446/8503/7097/356/3559/3688/3566/3918/5521/2246/2790/3673/5156/54331/2252/90993/3691/10…
hsa00190	Oxidative phosphorylation	103	-0.377480742495548	-1.4967139794528	0.00963553873325942	0.0295311418584154	0.0188766402084322	4914	tags=43%, list=24%, signal=33%	6389/50617/7388/27089/1353/440567/7384/9114/4696/1351/4706/5464/6391/4694/4711/4718/7385/29796/51606/27068/4707/4697/10975/1346/1347/537/4724/4712/4702/245973/51382/7381/526/1345/1349/4700/528/4715/529/6392/9550/1537/523/8992
hsa05202	Transcriptional misregulation in cancer	156	-0.378605292745764	-1.60755424000518	0.00080421606454194	0.00336956351092889	0.00215386314420959	3274	tags=33%, list=16%, signal=28%	51513/1655/4299/64919/55589/5090/1643/4300/8842/862/329/5747/1848/2078/3087/4086/1647/4005/4149/5468/3398/3569/1031/330/7157/6935/26471/3684/4609/2313/4208/4616/3576/4286/6688/1050/7048/2209/3248/929/1026/597/942/861/1436/4318/2115/3002/4094/3560/5328
hsa04932	Non-alcoholic fatty liver disease	144	-0.385131290080637	-1.61447870635316	0.000758818040926015	0.0032201124557245	0.00205833233773453	4642	tags=42%, list=23%, signal=32%	27089/3953/1432/440567/1965/7384/841/51422/3570/51094/836/4696/1351/4706/6391/4694/4711/4718/4790/7385/29796/4707/4697/10975/1346/7132/1347/3552/5601/4724/6945/4712/4702/9021/4217/7381/7040/1345/5295/998/1349/5603/5562/4700/840/4715/5468/3569/6720/6392/1537/10000/3553/8503/356/3576/637/2353/1050/355
hsa04810	Regulation of actin cytoskeleton	199	-0.387298817144774	-1.6894618193102	0.000103826116297926	0.000512932007382289	0.000327871946203975	2825	tags=29%, list=14%, signal=25%	3690/22808/5747/2846/10096/3678/5217/1073/8826/5500/57121/5881/5594/29895/5295/3985/998/5063/387/6237/56034/10627/7852/3672/7114/2934/3687/3684/6655/4478/5159/80310/3676/4638/7409/3685/55970/2149/8503/10092/3688/9459/2246/3673/5156/6387/2252/3071/3691/5880/3683/1902/3689/22801/2335/3694/10451
hsa04115	p53 signaling pathway	71	-0.39019880865483	-1.45813193409993	0.0107698083996748	0.0324073325481125	0.0207151338596616	3095	tags=31%, list=15%, signal=26%	1643/27244/8797/25898/27113/1647/901/900/3732/143686/7157/5268/2810/64393/4616/637/64065/50484/5054/1026/355/7057
hsa05170	Human immunodeficiency virus 1 infection	189	-0.391455873069176	-1.69438125025442	5.27068475623813e-05	0.000272593227236691	0.00017424467697432	2985	tags=27%, list=15%, signal=23%	7132/60489/5601/801/5747/5533/5578/1073/5881/5594/164668/5295/3985/5063/5603/7852/2771/2185/3134/6891/3133/3107/4615/59345/2788/2791/2776/27350/6890/55970/10000/8503/7097/356/637/919/2790/3106/2353/54331/920/567/5579/5880/355/917/1234/7099/51806/916/915
hsa04510	Focal adhesion	192	-0.392535410980666	-1.70742690465852	4.63295339759772e-05	0.000247339931387878	0.000158102484366238	3875	tags=39%, list=19%, signal=32%	4636/331/3611/1956/5923/103910/3695/394/3791/60/5595/5908/1282/5155/1499/64098/329/5601/3690/5747/25759/3678/5578/5500/5881/5594/3912/29895/5295/998/5063/387/56034/1291/10627/7424/1292/3672/3082/5906/857/131873/330/858/824/6655/5159/80310/3676/4638/7409/3371/3909/3685/3910/3381/10000/8503/3688/3918/3673/5156/3691/5579/5880/7057/6696/1293/1277/1278/22801/2335/7058/3694/10451
hsa05410	Hypertrophic cardiomyopathy	79	-0.398699897282668	-1.52525795746202	0.0122390088021194	0.03553606941668	0.02271505788759	4683	tags=43%, list=23%, signal=33%	3479/3680/71/8516/1605/51422/3696/489/3695/7134/60/7171/183/7169/3690/3678/55799/7043/7168/7040/5562/3672/4000/3569/6444/3676/3685/1906/3688/3673/6443/3691/22801/3694
hsa05415	Diabetic cardiomyopathy	169	-0.402446806871036	-1.73022694092626	0.000112709458218101	0.000548629862796933	0.000350690419533101	4687	tags=42%, list=23%, signal=33%	7416/27089/1432/440567/1509/7384/4087/5580/4696/1351/4706/489/9882/51660/6391/4694/291/4711/25874/4718/4790/292/1535/7046/7385/183/29796/1376/5972/4707/4697/10975/1346/1347/5601/4724/4712/4702/5578/5162/5500/7043/7381/7040/1345/5295/1349/5603/653361/4700/4715/817/6392/1537/185/9945/10000/948/8503/4688/4689/7048/5579/5880/4318/5350/1277/4313/1278/1536/1281
hsa04146	Peroxisome	75	-0.403621164817844	-1.53141868464862	0.00853366754784451	0.0271600380609282	0.0173610038169711	4138	tags=43%, list=20%, signal=34%	54677/225/5194/55670/8540/25824/23600/30/8310/8799/92960/26061/5264/8528/373156/5193/2053/10478/83594/55825/847/283927/51268/51/6648/5828/8309/51703/2182/6342/1384/2180
hsa04974	Protein digestion and absorption	84	-0.40600804504388	-1.56945199621572	0.00510466657526134	0.0176004649626198	0.0112504164652141	2160	tags=27%, list=11%, signal=25%	54407/4311/1291/1292/5547/9056/1306/131873/5222/1360/50509/1803/1303/1359/1293/1277/1289/1278/1290/1295/1281/1301/1300
hsa04926	Relaxin signaling pathway	121	-0.411491527394137	-1.6717437270935	0.000420531015793395	0.00183152323983702	0.00117073039022815	2318	tags=25%, list=11%, signal=22%	5594/7040/5295/5567/5603/4312/7424/2771/2769/59345/6655/2788/2791/1910/55970/1906/10000/8503/2790/2353/54331/7048/90993/4318/1277/4313/1278/59/4322/1281
hsa05167	Kaposi sarcoma-associated herpesvirus infection	177	-0.414215367871214	-1.77114905078357	2.94102849055105e-05	0.0001622467383954	0.000103709952035221	3548	tags=36%, list=17%, signal=30%	5595/3105/4790/5530/7314/4277/5155/1499/7132/100507436/131450/5601/801/5533/6774/23533/2921/7538/3717/5594/81631/5295/3572/5603/3455/3134/3454/3133/3569/3091/3107/7157/1827/59345/2788/2791/4609/5925/5294/1233/2920/7098/55970/10000/8503/3576/637/2790/3106/2353/54331/3459/3055/4067/1026/942/355/1230/1234/51806/2919/9976/718
hsa05120	Epithelial cell signaling in Helicobacter pylori infection	68	-0.421720903526575	-1.5640320621109	0.00665591285009433	0.0215990897390316	0.0138063826921461	3456	tags=37%, list=17%, signal=31%	4790/6868/83700/51606/102/5601/537/245973/2921/51382/526/998/5603/528/1839/529/9550/523/8992/2920/58494/3576/4067/2919/6352
hsa04071	Sphingolipid signaling pathway	115	-0.425448873484576	-1.70803102177507	0.000219752508565391	0.0010189630547456	0.000651332720635601	2985	tags=30%, list=15%, signal=26%	7132/5601/6609/5578/5525/4217/9846/134/5881/5594/5527/5295/55304/387/5603/2771/427/259230/8877/7157/2776/8698/140/10000/10558/8503/1901/5521/637/5579/5880/166929/81537/2207/2205
hsa05166	Human T-cell leukemia virus 1 infection	213	-0.427281149121671	-1.88043009008652	1.11891795250787e-06	8.23026316178012e-06	5.26087739073876e-06	2536	tags=27%, list=12%, signal=24%	1030/7043/7538/5594/7040/5295/1958/5567/706/3134/3601/3133/1959/3569/4049/3107/1031/2113/7157/4488/4609/5925/3932/10000/8503/3559/8829/6688/3600/3106/2353/7048/3112/920/90993/8850/567/1026/3683/917/3109/3108/3689/3560/3111/3561/3118/3115/916/915/3123/3113/3127/3122/3119/3117/4316
hsa05205	Proteoglycans in cancer	191	-0.428202548548959	-1.85861292094588	1.4549170579067e-06	1.04690770905895e-05	6.69195260044041e-06	2825	tags=34%, list=14%, signal=29%	3690/22808/5747/6774/3678/5578/8826/5500/5594/8322/7040/5295/998/387/6237/5567/5603/3082/1839/3316/857/3091/3059/817/1514/117581/7157/858/6655/4478/4609/7409/7477/3685/967/10000/8503/7097/356/10855/3688/6382/3673/8323/8321/6383/5579/1026/7078/960/355/7057/4318/7291/8325/7099/1277/4313/1278/5328/2335/1634/10451/4060
hsa04512	ECM-receptor interaction	80	-0.430342441095029	-1.6477057643724	0.00231229529204338	0.00850410824073732	0.00543592226550549	2013	tags=32%, list=10%, signal=29%	1291/1292/3672/131873/3676/3371/3909/3685/3910/3381/948/3688/6382/3918/3673/3691/960/7057/6696/1293/1277/1278/22801/2335/7058/3694
hsa05163	Human cytomegalovirus infection	203	-0.431714752814927	-1.89169932931876	8.14338665855424e-07	6.26851391623594e-06	4.00690506332779e-06	2848	tags=31%, list=14%, signal=27%	801/3690/5747/5533/6774/5578/3588/5881/5594/5295/387/5567/5603/7852/2771/2185/3134/6891/3133/3569/5734/3107/7157/59345/6655/2788/2791/4609/5925/2776/3685/6890/55970/10000/3553/8503/356/3576/637/2790/3106/3587/5156/6348/54331/6387/6347/90993/414062/567/5579/1026/5880/355/1230/1234/388372/6351/5733/51806/5732/6352
hsa05235	PD-L1 expression and PD-1 checkpoint pathway in cancer	88	-0.433473637635933	-1.68512103576935	0.00138936341206101	0.00541034458108466	0.00345835350865961	4803	tags=44%, list=23%, signal=34%	4792/5133/3460/1432/1950/114609/3716/10125/940/7189/4215/1956/5595/4790/5530/5533/6774/29126/7535/3458/3717/5594/5295/5603/3091/10538/4615/3932/10000/8503/7097/919/2353/3459/920/917/7099/916/915
hsa04142	Lysosome	129	-0.433650246530066	-1.77628788728863	9.27330519065069e-05	0.00046699401574755	0.000298507861870751	5536	tags=53%, list=27%, signal=39%	79158/245972/1515/1075/4074/10053/4864/533/6272/54/50617/5641/8905/410/3073/26503/8763/1509/256471/1511/9114/4669/22901/4668/23335/4126/5660/2581/4758/4891/11154/411/135112/950/9516/175/51606/2717/1213/3074/537/6609/8692/2517/1512/2760/2720/1200/9741/427/285362/968/1510/3988/1508/1514/1522/1203/3423/55353/967/3920/10577/1519/1521/7805/1520/1513
hsa04625	C-type lectin receptor signaling pathway	98	-0.442288337383502	-1.73475888898955	0.000221647552693906	0.0010189630547456	0.000651332720635601	4592	tags=46%, list=22%, signal=36%	1432/3709/602/5743/5580/841/93978/6850/868/805/5595/4790/5530/8915/30835/5601/801/22808/3659/5533/1540/5594/5295/387/6237/5603/64170/1263/114548/3592/1959/3569/26253/10000/3553/8503/3586/4046/29108/6367/6361/834/64581/2207/51806
hsa04210	Apoptosis	132	-0.448796935219764	-1.85767601612639	2.05219220023745e-05	0.000119171161101508	7.61755553550743e-05	4590	tags=42%, list=22%, signal=33%	3709/71/1509/79861/1965/4170/841/8717/836/331/843/839/60/5595/4790/2021/7132/8797/823/329/5601/143/1512/10039/4217/5594/5295/27113/1647/4000/840/1508/1514/1522/330/7157/824/3563/7277/4616/10000/8503/356/637/1519/2353/5551/1439/8743/597/355/3002/1521/1520/1513
hsa04666	Fc gamma R-mediated phagocytosis	91	-0.457806850953536	-1.78899274435078	0.000294038632642899	0.00133324366307945	0.000852224443564855	3548	tags=37%, list=17%, signal=31%	5595/10094/4082/2215/273/10096/5578/1073/9846/5594/5295/3985/998/10810/653361/382/2934/8877/7409/7454/3635/10000/8503/10092/3055/4067/2209/2213/5579/5880/2212/5788/2214/10451
hsa05162	Measles	122	-0.457888336249773	-1.86372512221685	1.80639552155821e-05	0.000106770878149244	6.8249154103985e-05	4247	tags=42%, list=21%, signal=33%	841/8717/3716/4938/836/940/9134/7189/868/4790/51135/4939/30835/3552/5601/25898/6774/7128/4179/8667/5295/23586/27113/3312/64135/3455/3454/3592/6504/3569/4615/7157/4478/10000/9367/3553/8503/7097/356/3559/637/2353/2213/355/917/51284/7099/3560/3561/916/915
hsa04217	Necroptosis	116	-0.459893103102107	-1.84599048101867	3.22106262889709e-05	0.000174782250846711	0.000111722793513083	2985	tags=35%, list=15%, signal=30%	7132/8797/823/3320/51652/3552/329/5601/6609/6774/7128/1540/5481/3458/11035/3717/57132/197259/3455/3454/114548/817/6775/330/51510/9525/824/25978/7098/3553/356/637/29108/3459/834/8743/90865/355/7099/2495/1536
hsa04630	JAK-STAT signaling pathway	130	-0.463148601299991	-1.90273677255428	9.39968167232786e-06	5.98325891065485e-05	3.82456683428725e-05	2896	tags=36%, list=14%, signal=31%	2670/1489/6774/9021/3588/3458/3717/9306/5295/116379/3572/11009/316/3455/3454/3601/3592/3569/5008/3594/6775/6655/2690/9180/4609/5159/3574/3563/1154/3597/10000/8503/3559/3586/3566/3600/50615/3587/5156/3459/1439/1026/53832/1438/3560/3561/3575
hsa04611	Platelet activation	111	-0.468775847525902	-1.86705824325884	2.90241006905785e-05	0.0001622467383954	0.000103709952035221	2825	tags=33%, list=14%, signal=29%	3690/8773/23533/5500/5594/5739/5295/387/5567/5603/8673/10627/2771/6916/5906/6786/2977/83706/5294/2776/4638/2149/10000/8503/5592/3688/695/3673/64805/4067/3937/54518/2207/1277/2212/1278/1281
hsa05169	Epstein-Barr virus infection	184	-0.485561721036201	-2.08958474665193	3.7421338913437e-09	3.6430774059846e-08	2.32869632247704e-08	2849	tags=31%, list=14%, signal=27%	5601/5700/9861/6774/7128/29760/7431/5295/23586/5603/1647/3455/3134/6891/3454/3133/3569/3107/4615/7157/4734/4609/5925/6890/4616/864/10000/8503/7097/956/695/637/919/3106/965/4067/3112/567/1026/960/3683/355/917/3109/3108/3627/3111/3118/3115/916/915/3123/3113/3127/3122/3119/3117
hsa04933	AGE-RAGE signaling pathway in diabetic complications	99	-0.489796126147179	-1.92453179524353	1.68042521410489e-05	0.00010300384182754	6.58412218391973e-05	3678	tags=42%, list=18%, signal=35%	4089/6401/5333/5595/4790/7046/1282/183/3552/5601/6774/5578/7043/3717/5594/7040/5295/998/1958/50507/5603/7424/113026/3569/185/7056/1906/10000/3553/8503/3576/7048/6347/5579/5054/1277/4313/1278/1536/2335/7412/1281
hsa04936	Alcoholic liver disease	120	-0.490112704966728	-1.98939910001036	1.10913550260013e-06	8.23026316178012e-06	5.26087739073876e-06	4280	tags=42%, list=21%, signal=34%	114609/841/8717/51422/223/51094/836/7189/8310/23765/219/4790/51135/1499/717/7132/224/5601/34/2921/4217/50507/5603/5562/3929/3592/3569/6720/728/4615/51/217/721/2920/6319/10000/3553/356/3576/712/929/720/355/125/714/7099/713/2919/719/23643/718
hsa05418	Fluid shear stress and atherosclerosis	134	-0.493107327372991	-2.04406338152644	5.92536883614646e-07	4.90324271191119e-06	3.13420825280378e-06	3814	tags=44%, list=19%, signal=36%	3383/805/7295/4780/1003/6401/3791/60/4790/1535/92/4259/5155/1499/7132/3320/3552/5601/801/3690/5747/221357/3458/4217/5881/5295/387/5603/5562/653361/857/1514/7157/858/4258/3162/1728/652/10365/4208/3685/7056/1906/10000/3553/8503/4688/1843/6382/2353/6347/6383/5880/5175/4318/4257/51806/4313/7412
hsa04621	NOD-like receptor signaling pathway	156	-0.494995458682843	-2.10174570624203	3.27247319114298e-08	3.00885729518979e-07	1.92329564742614e-07	2934	tags=44%, list=14%, signal=38%	5580/841/3716/4938/1673/58484/7189/331/7295/5595/4790/51135/1535/4939/11345/64127/3320/329/5601/7128/820/8767/79671/2921/11035/5594/81631/79792/79184/140609/387/5603/64170/23710/3455/3454/114548/3569/5027/51393/1508/9447/4615/330/10628/6041/2920/837/3553/3576/29108/10010/2633/118429/6347/834/3428/114769/84168/115361/7099/115362/84674/3606/2919/1536/2635/2634/6352
hsa05171	Coronavirus disease - COVID-19	199	-0.503284242112171	-2.1954095227488	1.36398898526146e-10	1.55682880731567e-09	9.95142599047382e-10	4256	tags=42%, list=21%, signal=34%	6194/6210/3716/4938/3570/6850/7189/9045/1956/6130/3921/11224/5595/4790/51135/6134/6155/6868/6188/4939/6169/6156/717/7132/5601/6774/6144/5578/6138/6235/5594/5295/23586/3572/6159/5603/4312/64135/3455/6170/1839/3454/629/6132/114548/3592/6189/3569/729/6166/728/6139/51065/4615/715/6403/185/6133/721/7098/3553/8503/7097/8829/3576/2353/51311/6347/834/712/5579/1675/720/716/714/51284/7099/2212/713/2162/362…
hsa04662	B cell receptor signaling pathway	78	-0.504863321194288	-1.92759399654418	5.09953377175522e-05	0.000267927885468409	0.000171262537698045	4008	tags=49%, list=20%, signal=39%	6850/971/84433/25780/5595/11024/4790/5530/353514/8915/11025/11027/23547/5533/29760/975/5881/5594/5295/118788/8519/973/6655/7409/10288/3635/10000/8503/695/10859/2353/11006/27071/4067/2213/5579/5880/10451
hsa04660	T cell receptor signaling pathway	97	-0.504919936794871	-1.98290400233355	3.91086068280869e-06	2.53822526668564e-05	1.62246232661413e-05	2849	tags=34%, list=14%, signal=29%	5601/5533/7535/3458/5594/9402/5295/998/5063/387/5603/3702/4690/926/6655/1493/29851/7409/3932/959/10000/8503/3586/919/2353/920/917/3937/925/5788/916/915/10451
hsa04623	Cytosolic DNA-sensing pathway	46	-0.50780851455542	-1.72308071326229	0.00246315525941655	0.00895938891062502	0.00572694282409168	2705	tags=33%, list=13%, signal=28%	84265/11035/23586/5440/3569/9447/3553/29108/834/90865/388372/6351/3606/3627/6352
hsa05417	Lipid and atherosclerosis	189	-0.512510536345463	-2.21835538328513	1e-10	1.18214285714286e-09	7.55639097744361e-10	3814	tags=44%, list=19%, signal=36%	3383/839/805/4780/6401/5595/4790/5530/51135/7436/1535/5908/1573/7132/8797/3320/5601/801/5747/5533/6774/5578/2921/3949/4217/3717/5594/5295/998/3312/387/5603/4312/653361/5906/3929/840/114548/3592/5468/3569/817/19/4615/7157/6403/6648/7409/2920/10333/959/10000/948/3553/8503/7097/4688/356/3576/637/29108/10010/2353/4689/6348/6347/4067/834/414062/929/8743/355/4318/7099/4973/3606/51806/2919/1536/23643/74…
hsa04613	Neutrophil extracellular trap formation	102	-0.512824904620065	-2.02255098824006	1.74691497873292e-06	1.23027416587361e-05	7.86405175196678e-06	2651	tags=43%, list=13%, signal=38%	291/60/5595/4790/292/2215/1535/3690/5578/820/10533/5594/5295/79792/5603/653361/728/6403/27180/3684/837/10000/8503/7097/4688/51311/4689/834/2209/5579/2357/5880/3683/64581/51284/7099/2359/6404/2212/366/3689/1536/2214/718
hsa05135	Yersinia infection	133	-0.513954764480591	-2.12477060312106	4.87541888187562e-08	4.36152337811035e-07	2.78793512164154e-07	2849	tags=34%, list=14%, signal=29%	5601/5747/10096/3678/7535/6197/5881/5594/5295/998/387/5603/2185/382/114548/3569/926/4615/2776/3676/7409/3932/7454/10000/7456/3553/8503/10092/3586/3576/3688/29108/2353/6347/834/920/8935/5880/3937/7099/925/3606/2212/2335/10451
hsa00590	Arachidonic acid metabolism	46	-0.51776409777096	-1.75686170144244	0.00165585584498347	0.00626091715971325	0.00400204913055291	3855	tags=48%, list=19%, signal=39%	5322/247/873/4051/1573/2678/151056/2053/2876/2687/6916/5730/113612/493869/9536/27306/5320/26279/5740/240/874/2878
hsa04670	Leukocyte transendothelial migration	103	-0.520319350880277	-2.06307013463476	5.1539455688865e-07	4.37424611102931e-06	2.79606763656191e-06	3875	tags=52%, list=19%, signal=43%	4636/3383/90952/1003/103910/394/60/7070/7122/1535/83700/5908/1499/5747/5578/29895/5295/998/387/5603/10627/7852/653361/2771/2185/5906/5010/3702/399/9076/3684/4478/3676/7409/58494/4267/8503/4688/3688/4689/6387/9071/5579/5880/3683/5175/10686/4318/83593/4313/3689/1536/7412/10451
hsa04064	NF-kappa B signaling pathway	102	-0.525052349021338	-2.07077530327361	6.25573869010385e-07	4.93011787243899e-06	3.15138715967638e-06	4008	tags=48%, list=20%, signal=39%	6850/84433/7189/8792/331/3383/4050/79092/4790/51135/8915/7132/329/7128/29760/1540/2921/7535/23586/1647/3929/4049/8740/4615/330/2920/3932/60401/959/6357/4616/3553/3576/695/6387/4067/929/5579/597/7099/388372/6351/2919/5328/6363/6366/23643/10673/7412
hsa04657	IL-17 signaling pathway	83	-0.537827261738465	-2.07542776897079	2.05492521764438e-06	1.41704218133394e-05	9.0578940514588e-06	4592	tags=47%, list=22%, signal=37%	1432/27189/5743/841/8717/836/1673/7189/6374/23765/5595/727897/4790/3320/5601/7128/2921/3458/29761/5594/5603/4312/3569/132014/6372/2920/3553/3576/2353/6361/6347/4318/6279/2919/3627/6280/3934/6356/4322
hsa04978	Mineral absorption	53	-0.540902270157194	-1.91544195098448	0.000186316643127395	0.000881011555359541	0.000563152560430172	1991	tags=34%, list=10%, signal=31%	538/4501/4502/1317/4499/4496/3162/9843/261729/4495/79901/26872/7421/4493/2495/10568/6523/30061
hsa05146	Amoebiasis	90	-0.546795047434264	-2.12998506673229	2.5456342703816e-07	2.21738143025345e-06	1.41737531397978e-06	3456	tags=49%, list=17%, signal=41%	4790/9630/2774/912/1282/5272/5747/5578/2921/7043/5868/3458/338382/3912/7040/5295/5567/910/3592/3569/2769/3684/2776/2920/3909/3910/3553/8503/7097/3586/3576/3918/913/929/909/5579/911/7099/1277/2919/3689/1278/2335/1281
hsa04514	Cell adhesion molecules	132	-0.554292399111039	-2.29434654059195	2.34107024575033e-10	2.5829808378112e-09	1.65107059437129e-09	1933	tags=41%, list=9%, signal=37%	57863/3134/201633/57502/5010/3133/3107/9076/926/6403/3684/1493/29851/3676/6693/3685/58494/959/4267/214/3688/6382/3106/965/9071/1272/3112/920/6383/3683/5175/942/10686/80380/925/6404/6402/3109/3108/3689/79679/3111/5788/1462/3118/7412/3115/3123/3113/3127/3122/914/3119/3117
hsa04664	Fc epsilon RI signaling pathway	60	-0.557568047474823	-1.9955138345889	1.73490481116829e-05	0.000104409725908492	6.67398788602538e-05	2849	tags=35%, list=14%, signal=30%	5601/5578/9846/5881/5594/5295/5603/6655/7409/3635/10000/8503/695/4067/5880/3937/240/2207/2205/241/10451
hsa04668	TNF signaling pathway	109	-0.558176216197753	-2.22283157339476	4.20960494976469e-09	3.98108353820604e-08	2.54475366888031e-08	4592	tags=50%, list=22%, signal=39%	1432/602/3976/5743/3726/1386/841/8717/836/3383/6374/843/6401/5595/4790/9530/7133/6376/7132/64127/329/5601/3659/7128/4323/2921/9021/4217/11035/5594/5295/5603/197259/7424/840/3569/4049/330/6372/2920/1906/10000/3553/8503/3600/2353/6347/90993/355/4318/2919/3627/7412/6352
hsa00512	Mucin type O-glycan biosynthesis	31	-0.570950947950977	-1.79470202496354	0.00394076343605189	0.0137304494456124	0.00877665873292443	4190	tags=55%, list=20%, signal=44%	51301/55808/9245/117248/79623/27090/55568/10331/374378/2650/2591/56913/29071/2589/11227/10610/6482
hsa05164	Influenza A	148	-0.573630116485886	-2.41552773951424	1e-10	1.18214285714286e-09	7.55639097744361e-10	2651	tags=38%, list=13%, signal=33%	5578/79671/9021/3458/3717/5594/5295/23586/23430/5611/56649/91543/64135/3455/3454/114548/3592/3569/4615/55916/6041/4261/7098/10000/3553/8503/356/3576/637/29108/3459/6347/834/3112/5579/8743/90865/355/64499/51284/7099/7177/3606/3109/3108/3627/3111/3118/3115/3123/6352/3113/3127/3122/3119/3117
hsa04062	Chemokine signaling pathway	179	-0.576388865255402	-2.47128869782973	1e-10	1.18214285714286e-09	7.55639097744361e-10	2769	tags=41%, list=13%, signal=36%	5747/25759/6774/23533/2921/5881/3717/5594/5295/998/387/5567/7852/653361/2771/2185/5906/3702/10344/2268/6369/59345/1794/6655/6372/2788/2791/5294/2776/7409/1233/2920/7454/55970/6357/10000/6355/8503/729230/3576/2790/6367/6348/54331/6387/1236/3055/6361/6347/4067/10663/414062/5579/5880/6362/1230/1234/2833/388372/6351/2919/3627/1524/6363/6366/6846/6356/6373/6352/9547/10563/10451/4283
hsa04060	Cytokine-cytokine receptor interaction	236	-0.577678721769469	-2.57677585582645	1e-10	1.18214285714286e-09	7.55639097744361e-10	2521	tags=44%, list=12%, signal=39%	2921/7043/3588/3458/27242/7040/8784/3572/8794/11009/7852/3455/3454/3601/3592/650/8742/3569/4049/8740/5008/3594/132014/10344/6369/7292/3603/608/2690/6372/9180/3574/652/10148/1233/3563/2920/9235/60401/8744/944/3597/3556/959/6357/6355/3553/356/3559/3586/729230/3576/3566/3600/51554/50615/3587/939/6367/6348/6387/970/3459/1236/6361/7048/6347/10663/920/414062/1439/53832/8743/90865/355/6362/1436/1230/123…
hsa00760	Nicotinate and nicotinamide metabolism	34	-0.583260552692023	-1.871333022193	0.000902117897156194	0.00373251279948375	0.00238586443853151	2971	tags=32%, list=14%, signal=28%	5167/4860/83594/93100/952/316/23057/54981/683/4907/4837
hsa04380	Osteoclast differentiation	124	-0.584412012717824	-2.3844852755467	1e-10	1.18214285714286e-09	7.55639097744361e-10	3548	tags=47%, list=17%, signal=39%	5595/11024/4790/5530/353514/2215/1535/7046/11025/11027/23547/7132/3552/5601/3690/5533/29760/1540/9021/3458/9846/5594/7040/5295/5603/653361/9103/3455/3454/5468/126014/10288/3932/140885/10000/3553/8503/4688/4286/695/6688/55423/10859/2353/11006/4689/3459/7048/2209/2213/1436/3937/54209/7305/2212/2214/4982/1513
hsa05143	African trypanosomiasis	33	-0.584837732831707	-1.8644932329976	0.00132177314205778	0.00527116759061598	0.00336939000067995	1729	tags=48%, list=8%, signal=44%	5578/3458/3592/3569/4615/2776/3910/3553/356/3586/8542/5579/355/3606/7412/3620
hsa05145	Toxoplasmosis	107	-0.603892958657771	-2.41013311316978	1e-10	1.18214285714286e-09	7.55639097744361e-10	2985	tags=44%, list=15%, signal=38%	7132/329/5601/6774/23533/3949/7043/3588/3458/3717/5594/3912/7040/3312/5603/2771/3592/4615/330/5294/4261/3909/3910/959/10000/7097/3586/3688/3918/3587/3459/3112/1234/7099/240/3109/3108/3111/23643/3118/3115/3123/3113/3127/3122/3119/3117
hsa04650	Natural killer cell mediated cytotoxicity	101	-0.608704906376696	-2.40112386926951	1e-10	1.18214285714286e-09	7.55639097744361e-10	3548	tags=50%, list=17%, signal=41%	5595/3105/5530/2215/117157/4277/8797/80328/100507436/5533/25759/5578/7535/3458/10870/5881/5594/5295/2185/259197/3821/3455/3454/51744/3133/3107/6655/7409/3932/8503/356/637/919/3106/5551/4068/3459/5579/5880/8743/3683/355/3937/7305/3002/2207/3689/2214/962/10451
hsa05134	Legionellosis	56	-0.615298799026793	-2.19286314650947	6.16100197599856e-07	4.93011787243899e-06	3.15138715967638e-06	4247	tags=54%, list=21%, signal=43%	841/1915/836/5861/1378/58484/9554/23786/4790/2921/3312/840/3592/51128/3569/4615/3684/2920/3553/7097/3576/29108/834/7100/929/7099/3606/2919/3689/718
hsa04658	Th1 and Th2 cell differentiation	84	-0.617187304855815	-2.3857799358145	6.40766850860618e-10	6.62793211358952e-09	4.23664924417711e-09	2849	tags=46%, list=14%, signal=40%	5601/5533/30009/7535/3458/2625/3717/5594/5603/3592/84441/3594/6775/3932/864/3559/3566/919/2353/3459/3112/920/917/4094/3109/3108/3560/3111/3561/3118/3115/916/915/3123/3113/3127/3122/3119/3117
hsa04145	Phagosome	142	-0.61868486979446	-2.58569828276995	1e-10	1.18214285714286e-09	7.55639097744361e-10	2825	tags=50%, list=14%, signal=43%	3690/537/3678/245973/10952/5868/338382/51382/526/6441/653361/9103/7037/3134/6891/528/529/83547/3133/1514/23673/3107/22925/9550/715/3684/523/8685/8992/11151/7277/10333/4360/3685/6890/3920/948/7097/4688/3688/3106/3673/4689/81035/3112/2209/2213/929/7057/4481/64581/7099/4973/3109/2212/3108/3689/1520/3111/1536/2214/718/3118/3115/3123/3113/3127/3122/7058/3119/3117
hsa05340	Primary immunodeficiency	32	-0.623537621599325	-1.97148866463191	0.000370489073285167	0.00165718761158635	0.00105929308293483	1809	tags=56%, list=9%, signal=51%	29760/7535/6891/973/926/29851/4261/3932/6890/959/695/920/925/3561/5788/3575/916/915
hsa05152	Tuberculosis	159	-0.625933748764821	-2.66442879823587	1e-10	1.18214285714286e-09	7.55639097744361e-10	3456	tags=50%, list=17%, signal=42%	4790/5530/51135/2215/8915/30835/51606/7132/64127/3552/5601/801/537/5533/3656/820/8767/7043/5868/3588/3458/3717/5594/7040/387/5603/64170/9103/1263/3929/3592/3569/817/22925/4615/8877/3687/3684/11151/4261/10333/4360/26253/3920/10000/3553/7097/3586/637/4046/3587/3459/3112/2209/2213/929/7421/7096/64581/7099/2207/3606/972/3109/2212/3108/51806/3689/1520/3111/2214/718/3118/3115/3123/3113/3127/3122/3119/3…
hsa04659	Th17 cell differentiation	98	-0.63416650659207	-2.487350199913	1e-10	1.18214285714286e-09	7.55639097744361e-10	2919	tags=51%, list=14%, signal=44%	3320/5601/5533/6774/6097/30009/7535/3458/2625/3717/5594/7040/3572/5603/3662/3569/3091/3594/50943/10148/3932/3556/3553/3559/3566/919/50615/2353/3459/7048/3112/196/920/861/917/3109/3108/3560/3111/3561/3118/3115/916/915/3123/3113/3127/3122/3119/3117
hsa05142	Chagas disease	98	-0.63431751183356	-2.48794247798777	1e-10	1.18214285714286e-09	7.55639097744361e-10	3548	tags=48%, list=17%, signal=40%	5595/4790/9630/51135/2774/7046/7132/5601/7043/3458/5594/7040/5295/5603/2771/3592/3569/4615/2769/2776/10333/10000/3553/8503/7097/356/3586/3576/5521/919/2353/6348/3459/7048/6347/414062/712/5054/355/917/714/7099/713/718/916/915/6352
hsa00604	Glycosphingolipid biosynthesis - ganglio series	15	-0.647994702382864	-1.69195729439799	0.0116100829745323	0.0343119416479481	0.0219325815590319	3237	tags=60%, list=16%, signal=51%	9197/27090/3074/8705/30815/2720/6489/6482/81849
hsa04216	Ferroptosis	39	-0.659161995474735	-2.18194544376016	3.05124055519455e-06	2.01992124753879e-05	1.2911565296718e-05	3448	tags=51%, list=17%, signal=43%	4891/8031/55240/2512/10533/81631/23657/7037/7157/3162/6303/51703/5621/64116/2182/2180/2495/1356/1536/30061
hsa04620	Toll-like receptor signaling pathway	88	-0.672580783840136	-2.61464580241707	1e-10	1.18214285714286e-09	7.55639097744361e-10	2318	tags=40%, list=11%, signal=35%	5594/5295/5603/3929/3455/3454/3592/3569/4615/10333/7098/10000/3553/8503/7097/3576/2353/51311/6348/414062/7100/929/942/6696/7096/51284/7099/388372/6351/3627/23643/6373/6352/1513/4283
hsa05133	Pertussis	72	-0.680829541187994	-2.547953167065	1e-10	1.18214285714286e-09	7.55639097744361e-10	3882	tags=65%, list=19%, signal=53%	7189/6374/805/5595/710/4790/51135/717/3552/5601/801/3659/3678/1073/5594/387/5603/2771/722/840/114548/3592/3569/4615/715/3684/6372/721/3553/3586/3576/3688/29108/2353/834/712/929/3394/720/716/714/7099/713/51806/3689/23643/718
hsa04610	Complement and coagulation cascades	68	-0.710507546094594	-2.63505217116575	1e-10	1.18214285714286e-09	7.55639097744361e-10	1872	tags=49%, list=9%, signal=44%	722/629/729/1604/728/715/3687/3684/721/966/2149/7056/3426/5104/5627/5055/712/1191/5054/11326/1675/720/2/716/714/713/2162/3689/3075/719/5328/718/5265
hsa00120	Primary bile acid biosynthesis	13	-0.710536521524487	-1.79200034518498	0.00563759131370095	0.0190412522942348	0.012171384039247	4100	tags=69%, list=20%, signal=55%	23600/1582/1593/51302/9420/8309/80270/9023/6342
hsa04612	Antigen processing and presentation	61	-0.715209165528823	-2.5701092404439	1e-10	1.18214285714286e-09	7.55639097744361e-10	1867	tags=54%, list=9%, signal=49%	3320/5720/3805/3458/3312/3821/3134/6891/3133/1508/1514/3107/926/4261/6890/3106/3112/920/567/925/972/3109/3108/1520/3111/3118/3115/3123/3113/3127/3122/3119/3117
hsa05416	Viral myocarditis	55	-0.720582765198732	-2.56101400504562	1e-10	1.18214285714286e-09	7.55639097744361e-10	1994	tags=51%, list=10%, signal=46%	1525/3134/3133/857/1604/3107/6444/959/637/3106/5551/6443/3112/5880/3683/942/3109/3108/3689/3111/3118/3115/3123/3113/3127/3122/3119/3117
hsa05144	Malaria	46	-0.72305260900187	-2.45344055787614	4.38453664683022e-10	4.68155364548646e-09	2.99250209172453e-09	2511	tags=63%, list=12%, signal=55%	7043/3458/975/7040/3082/3592/3569/4615/6403/959/948/3553/7097/3586/3576/6382/2532/6347/6383/3683/5175/7057/7099/3606/2995/3689/3820/7412/7058
hsa05140	Leishmaniasis	72	-0.727552651446435	-2.72281088042213	1e-10	1.18214285714286e-09	7.55639097744361e-10	2511	tags=56%, list=12%, signal=49%	7043/3458/3717/5594/7040/5603/653361/9103/3592/4615/3684/3676/3553/7097/4688/3586/3688/2353/4689/3459/3112/2209/5579/7099/3109/2212/3108/3689/3111/1536/2214/718/3118/3115/3123/3113/3127/3122/3119/3117
hsa05323	Rheumatoid arthritis	85	-0.729401319110072	-2.82527615683387	1e-10	1.18214285714286e-09	7.55639097744361e-10	2875	tags=61%, list=14%, signal=53%	3552/8741/537/245973/2921/7043/3458/51382/526/7040/4312/528/529/3569/1514/9550/284/523/6372/1493/8992/2920/3553/7097/3576/3600/2353/6348/6387/6347/3112/414062/3683/942/7099/3606/3109/3108/2919/3689/3111/10673/3118/3115/3123/6352/3113/3127/3122/1513/3119/3117
hsa04061	Viral protein interaction with cytokine and cytokine receptor	90	-0.735103891690155	-2.86352321430829	1e-10	1.18214285714286e-09	7.55639097744361e-10	2135	tags=57%, list=10%, signal=51%	3572/8794/11009/7852/3569/4049/8740/10344/6369/6372/1233/2920/6357/6355/3559/3586/729230/3576/51554/3587/6367/6348/6387/1236/6361/6347/414062/53832/8743/6362/1436/1230/1234/2833/388372/6351/3606/2919/3560/3627/3561/1524/6363/6366/6846/6356/6373/6352/9547/10563/4283
hsa04640	Hematopoietic cell lineage	85	-0.744029370978509	-2.88193671540709	1e-10	1.18214285714286e-09	7.55639097744361e-10	2043	tags=62%, list=10%, signal=56%	4311/952/910/3672/7037/100133941/928/945/3569/1604/926/290/3684/3574/3676/4254/3563/966/921/948/3553/3559/3566/3673/951/3112/2209/920/913/924/929/909/911/960/1436/917/1438/925/3109/3108/3111/3575/3118/3115/916/915/3123/3113/3127/3122/914/3119/3117
hsa04672	Intestinal immune network for IgA production	39	-0.753060100061995	-2.49276515558885	8.66584958310566e-10	8.6921097333575e-09	5.5560949480199e-09	1924	tags=64%, list=9%, signal=58%	7852/3601/3569/608/29851/3676/959/3586/5284/3600/6387/3112/942/3109/3108/3111/10673/3118/3115/3123/3113/3127/3122/3119/3117
hsa05321	Inflammatory bowel disease	53	-0.765654997924167	-2.711335825192	1e-10	1.18214285714286e-09	7.55639097744361e-10	2934	tags=70%, list=14%, signal=60%	64127/3552/6774/6097/30009/7043/3458/2625/7040/3592/3569/3594/50943/6775/3553/7097/3586/3566/50615/3459/3112/7100/7099/4094/3606/3109/3108/3111/3561/3118/3115/3123/3113/3127/3122/3119/3117
hsa05322	Systemic lupus erythematosus	46	-0.792731603374743	-2.68987324437515	1e-10	1.18214285714286e-09	7.55639097744361e-10	1647	tags=59%, list=8%, signal=54%	729/715/721/959/3586/3112/2209/712/942/720/716/714/3109/2212/3108/713/3111/2214/718/3118/3115/3123/3113/3127/3122/3119/3117
hsa04940	Type I diabetes mellitus	37	-0.819982801674903	-2.65740849920472	1e-10	1.18214285714286e-09	7.55639097744361e-10	1823	tags=65%, list=9%, signal=59%	3134/3592/3133/4049/3107/3553/356/3106/5551/3112/942/355/3002/3109/3108/3111/3118/3115/3123/3113/3127/3122/3119/3117
hsa05150	Staphylococcus aureus infection	61	-0.837302500024523	-3.0088525092777	1e-10	1.18214285714286e-09	7.55639097744361e-10	2008	tags=75%, list=10%, signal=68%	3880/9103/629/3861/728/715/6403/3684/721/3866/3586/3426/3868/5724/3112/2209/2213/712/2357/3683/1675/720/716/714/2359/6404/3109/2212/3108/713/3689/3075/3111/719/2214/718/3118/3115/3123/3113/3127/3122/3119/3117/1672/25984
hsa05332	Graft-versus-host disease	32	-0.843959881556332	-2.66841531650446	1e-10	1.18214285714286e-09	7.55639097744361e-10	1867	tags=75%, list=9%, signal=68%	3821/3134/3133/3569/3107/3553/356/3106/5551/3112/942/355/3002/3109/3108/3111/3118/3115/3123/3113/3127/3122/3119/3117
hsa05320	Autoimmune thyroid disease	32	-0.851892870067852	-2.69349767943711	1e-10	1.18214285714286e-09	7.55639097744361e-10	1823	tags=75%, list=9%, signal=68%	3134/3133/3107/1493/959/356/3586/3106/5551/3112/942/355/3002/3109/3108/3111/3118/3115/3123/3113/3127/3122/3119/3117
hsa05330	Allograft rejection	31	-0.853223255121609	-2.68198434420362	1e-10	1.18214285714286e-09	7.55639097744361e-10	1823	tags=77%, list=9%, signal=71%	3134/3592/3133/3107/959/356/3586/3106/5551/3112/942/355/3002/3109/3108/3111/3118/3115/3123/3113/3127/3122/3119/3117
hsa05310	Asthma	21	-0.928112004391752	-2.67186275414317	1e-10	1.18214285714286e-09	7.55639097744361e-10	973	tags=81%, list=5%, signal=77%	959/3586/3112/2207/3109/3108/2205/3111/3118/3115/6356/3123/3113/3127/3122/3119/3117
