# Supplementary material for: Identifying the Role of Oxidative Stress-Related Genes as Prognostic Biomarkers and Predicting the Response of Immunotherapy and Chemotherapy in Ovarian Cancer
Source: Oxid Med Cell Longev. 2022 Dec 12;2022:6575534. doi: 10.1155/2022/6575534 (PMC9764017; doi:10.1155/2022/6575534)
Supplement: Supplementary 5 — Supplement Table 4: signaling pathway analysis in regard to CD38. [file 6575534.f5.txt]

ID	Description	setSize	enrichmentScore	NES	pvalue	p.adjust	qvalues	rank	leading_edge	core_enrichment
hsa05217	Basal cell carcinoma	59	0.379564695797679	1.54650795278442	0.00603727928952083	0.0234303934331403	0.0166441283671	1746	tags=22%, list=9%, signal=20%	7476/80326/83439/11211/2736/7475/7481/5727/7482/6608/2735/7483/7976
hsa00190	Oxidative phosphorylation	103	0.322986340591859	1.3982583609435	0.0044814987357232	0.018262107348072	0.0129727594981461	4132	tags=39%, list=20%, signal=31%	56901/525/1350/440567/126328/1327/7388/4724/7381/51079/4697/9167/1339/4714/4695/1340/155066/1351/4713/1337/4725/1329/55967/534/9377/4715/7385/4696/4705/4728/4698/4710/4716/10975/1345/9296/495/4731/496/4708
hsa05200	Pathways in cancer	485	-0.47017487060122	-1.30249666606181	0.000718971276171434	0.00339687878307083	0.00241302335252045	4560	tags=37%, list=22%, signal=30%	1147/10000/2246/57449/5900/1017/7296/7189/331/1284/1399/6789/2324/8900/3551/7187/1871/3595/613/2322/8313/5914/10023/4855/9817/6932/2033/5604/9826/109/10018/637/3845/5898/5336/5899/51806/9138/3091/4257/4853/2475/51561/8453/7186/998/3576/1643/4893/2323/1950/8517/841/208/3454/5888/581/5915/2099/5594/3460/1282/207/332/7170/94235/3655/5292/8202/1869/7048/9134/6654/5159/369/5467/4791/2885/3455/5732/896…
hsa04151	PI3K-Akt signaling pathway	311	-0.473751012313088	-1.30539726980782	0.00338532877882089	0.014332690673969	0.0101814399363034	4601	tags=41%, list=22%, signal=32%	4914/4515/1278/1147/10000/2246/672/1017/1284/5519/7148/2324/3551/5526/1292/23678/5562/2322/3693/1977/28227/7450/5604/7534/7010/8516/10018/56034/5528/3845/5934/4915/3672/3381/2475/3456/3690/4893/2323/1950/8517/208/3454/5594/1282/207/94235/3655/10488/9134/6654/5159/54541/1311/2321/2885/3455/896/3563/2065/5156/3082/3791/5290/2149/3371/4170/3688/1277/5106/3716/3680/8115/1293/7057/6446/930/23566/3694/…
hsa04080	Neuroactive ligand-receptor interaction	236	-0.477245552928889	-1.30818992587459	0.0102378951274004	0.0375006046239611	0.0266391120996818	3019	tags=23%, list=15%, signal=20%	2906/1138/5697/3814/1903/1143/3357/5746/2556/56413/6343/5732/552/10203/79924/187/9294/2149/9934/2908/9002/154/64106/23566/2358/2568/1902/10161/1134/3274/5023/5739/1901/1241/5733/5734/1910/1909/5031/5027/10800/2564/53829/140/286530/718/4922/728/5724/8698/27334/2357/719/2359/3001
hsa05165	Human papillomavirus infection	304	-0.481346312196976	-1.32631403299803	0.00405274722825956	0.0167239948912989	0.0118801384439321	4564	tags=39%, list=22%, signal=31%	1278/1147/10000/1017/1284/5933/5519/7148/8900/3551/5526/1292/7187/1741/8313/4855/3693/5663/23352/28227/6932/2033/7450/5604/5700/8516/29110/5528/537/3845/5934/4799/533/3672/3381/4853/2475/3456/998/3690/4893/1950/8517/841/208/3454/581/5594/1282/207/526/528/7132/529/3655/1869/10488/9134/9114/6654/5159/8717/1311/148022/2885/3455/5584/896/7297/5290/3371/3688/1277/3716/3680/1293/7057/4242/3694/5567/561…
hsa04144	Endocytosis	239	-0.48544058757861	-1.33073700997847	0.00561431853612597	0.0222290747354353	0.0157907537675033	5346	tags=40%, list=26%, signal=30%	25978/79643/163/57154/4734/10109/2264/9135/89853/23527/4218/382/868/8729/10564/10565/440073/9525/116985/7879/7189/23396/832/1173/10097/5869/26119/11059/377/147179/830/57132/378/51100/51534/829/64750/60682/2060/3306/11311/1785/10096/10092/1213/273/998/81873/2869/30011/58533/6643/3310/7048/9815/23096/11021/10095/3312/5584/409/7037/3579/26286/5156/9267/5878/30844/5371/3949/408/116984/51510/9744/5337…
hsa05205	Proteoglycans in cancer	191	-0.490283025911892	-1.33647252990028	0.0121808215743637	0.0436367893762921	0.030998042178832	3557	tags=37%, list=17%, signal=31%	7430/1432/3845/5336/9138/3091/2475/3709/998/3690/4893/54776/208/2099/5594/1655/207/5600/406903/6654/6382/369/2885/6548/2316/2002/4313/2065/3082/3791/5290/1839/5603/3688/1277/5058/5777/817/7057/1634/8826/5579/5567/8503/6774/7124/22808/836/355/4060/7291/5293/5329/3685/4478/3678/1514/1026/7409/5328/10855/2335/10451/356/7040/960/7099/7097/3059/4318
hsa04810	Regulation of actin cytoskeleton	199	-0.492843182609382	-1.34474054788511	0.0111346297818653	0.0403321034320897	0.0286505093802381	4574	tags=41%, list=22%, signal=32%	7074/2245/2246/60/23396/10097/10627/1399/54434/4629/3681/3693/2934/5604/4660/8516/56034/7430/81/3845/85464/9138/3672/10096/10092/87/10788/998/3690/4893/81873/1950/54776/3984/5594/128239/85477/3655/6654/5159/369/7114/10095/3985/6548/10672/5156/89846/5290/2149/3688/3680/5058/4627/8826/3694/2252/8503/22801/4638/1902/22808/5305/5293/7852/3685/4478/3678/3695/57121/7409/3676/6387/9459/2335/10451/3687/3…
hsa05132	Salmonella infection	244	-0.505849036082496	-1.38653184146982	0.000819717564893581	0.00376377360782123	0.0026736525467248	4560	tags=41%, list=22%, signal=33%	1147/10000/60/55207/7879/29109/7189/10097/10627/5869/3551/10006/1783/10392/10121/6932/5604/57617/1432/10376/79443/5898/6993/64837/1785/26084/10096/10092/23207/55770/7186/998/3576/81873/8517/841/5287/208/581/4074/5594/207/837/5600/23118/8737/7132/79792/3606/57381/8717/7100/10095/4646/9842/2316/391/838/9367/83547/3654/840/4792/5290/84790/8767/9267/5878/5603/5058/6990/51429/84617/29108/58484/4790/71…
hsa05131	Shigellosis	215	-0.515840018500196	-1.41064393151339	0.00144504331610459	0.00654283501458469	0.0046478001395177	4758	tags=40%, list=23%, signal=31%	382/5331/257397/1147/10000/60/7189/10097/10627/1399/81631/3551/10392/64121/29110/9181/25851/1432/81/5336/10096/10092/2475/3709/87/7186/3456/998/3576/81873/8517/208/581/5594/55072/207/4793/4303/837/5600/23118/8737/7132/7323/3606/8717/8878/7100/10670/10095/8678/92610/5481/23048/4792/5290/8767/10241/9267/58528/5603/3688/7094/29108/3554/58484/8503/55062/4790/7124/114548/9844/4615/5293/7314/3678/3553/…
hsa05130	Pathogenic Escherichia coli infection	184	-0.523295055563376	-1.42391519684793	0.00223840112813716	0.00960156273385149	0.00682061285581959	4178	tags=42%, list=20%, signal=34%	147179/5010/10802/3551/4629/10006/9826/9181/10427/7430/1432/10376/9632/9138/10096/10092/7186/998/3576/81873/8517/841/581/5594/4793/837/5600/23118/8737/7132/3606/8717/4690/7100/10095/4646/10672/4641/3654/840/4792/84790/2149/9267/5603/3688/5058/5777/4627/4644/84617/29108/3554/9871/4790/7124/1902/578/836/355/114548/4615/3569/64005/57121/3553/9071/356/4542/7456/7099/834/27128/3059/3071/2212/8743
hsa05418	Fluid shear stress and atherosclerosis	134	-0.524610891486682	-1.41576919673698	0.00565954970258016	0.0222290747354353	0.0157907537675033	3652	tags=34%, list=18%, signal=28%	9181/5327/1432/4205/51806/4257/6401/3690/8517/208/90/207/5600/7132/1003/6382/8878/4313/1535/3791/4217/5290/5603/4208/59341/7056/3554/8503/4790/7124/10365/5293/3458/3685/1728/1514/3553/6347/5175/7412/4688/3162/653361/5880/3383/4318
hsa04068	FoxO signaling pathway	123	-0.528321298426358	-1.42106484347441	0.00612782196632451	0.0235019995414328	0.0166949948308531	4560	tags=43%, list=22%, signal=34%	1147/10000/1017/6789/3551/23678/5562/2033/5604/10018/1432/3845/5934/1263/10733/4893/9133/1950/208/5594/207/4303/5600/80854/7048/6654/369/23710/2885/5290/5603/5106/5347/6446/8503/6774/1032/10365/116986/114907/1901/5293/3569/1026/3586/5105/6648/1030/356/7040/3575/8698/8743
hsa04071	Sphingolipid signaling pathway	115	-0.529351077843364	-1.41939220180063	0.00839562229301362	0.0314594582473844	0.0223476939438959	3816	tags=39%, list=19%, signal=32%	28227/253782/5604/9517/5528/259230/637/1432/3845/7186/130367/4893/1903/208/581/5594/207/5600/7132/8717/9846/2771/10672/9294/4217/5290/6609/166929/5603/1509/5579/5337/8503/340485/4790/7124/1901/5293/81537/8877/5330/140/8698/5880/2207
hsa04072	Phospholipase D signaling pathway	133	-0.531355134964961	-1.43397391232256	0.00385663614885652	0.0161187613400926	0.0114502017914768	3834	tags=38%, list=19%, signal=31%	1606/5604/109/56034/8525/3845/5898/5336/1785/5899/2475/3576/4893/6464/1950/208/5594/207/6654/5159/9846/1609/2885/552/10672/3579/5156/5290/2149/56894/9267/2185/8605/23566/146850/5337/8503/1902/10161/196883/22808/113/5293/8877/57121/23533/5294/5330/27128/2207
hsa04218	Cellular senescence	152	-0.536789895159239	-1.45239409219849	0.00185557991010017	0.00817458176611697	0.00580693570728361	4771	tags=43%, list=23%, signal=34%	11200/4776/10114/10000/1017/983/4775/5530/5933/90550/8900/1871/5604/1432/3845/5934/51806/9261/2475/3709/132660/3576/4893/9133/208/4683/5594/207/5600/5533/1869/7048/9134/8878/2305/4773/896/3486/1870/5481/5290/5603/59341/4772/8503/4790/890/22808/4605/83593/2113/5293/3805/3569/1026/898/1030/5054/3135/7040/3133/1029/3105/3107/3134/3106
hsa05168	Herpes simplex virus 1 infection	462	-0.547783563361008	-1.51654882077023	1.25932045932156e-08	1.14038463816341e-07	8.10089184358899e-08	3136	tags=20%, list=15%, signal=17%	7186/3456/5199/3690/94039/8517/841/3054/10308/208/3454/581/3460/207/7569/23118/64170/7132/8717/148022/811/7592/3455/7297/3654/4792/5290/3716/5371/5610/8503/3459/25833/4790/7124/5452/578/836/355/9641/8740/4615/6892/5293/3458/6672/10379/8764/3717/3569/90649/6773/3678/7098/3553/330/3135/29992/4049/684/356/718/6347/6891/3109/3108/3112/3133/3665/23586/972/7097/64135/567/3105/3115/3119/3107/6772/3111/3…
hsa03320	PPAR signaling pathway	64	-0.583225378838681	-1.5290686970242	0.00816471674238857	0.030949972767659	0.0219857733577171	4931	tags=59%, list=24%, signal=45%	11001/5465/3611/1582/2181/8310/6342/51129/51/1374/1593/1375/4023/10999/10580/1962/5467/1376/3157/2182/1622/5106/51703/5468/9415/3158/10062/2167/729359/2710/5346/948/2180/123/6319/4199/5105/4973
hsa05203	Viral carcinogenesis	161	-0.586833581787757	-1.59170574088112	2.36439565276388e-05	0.000132895341862246	9.44041821430225e-05	3935	tags=41%, list=19%, signal=33%	2960/2934/23352/55869/2033/7534/5700/81/3845/5934/9261/87/7186/998/4893/9734/8517/841/581/5594/85477/10488/9134/9114/8717/4791/2885/896/991/1959/4792/5290/8850/3716/1237/5567/5610/8503/6774/7533/5366/4790/890/6776/578/836/7185/1233/5293/6672/10379/3718/1026/4067/898/1030/3135/718/3133/3665/1029/3105/3107/1234/3134/3106
hsa01212	Fatty acid metabolism	51	-0.591146164484995	-1.51550491139855	0.0134059586843697	0.0475037231641796	0.0337449760933791	5502	tags=59%, list=27%, signal=43%	37/126129/2194/84869/5538/2181/31/3295/3033/8310/6342/51/79071/1374/64834/1375/6785/79993/35/1962/1376/3992/2182/51703/39/9415/60481/2180/6319/83401
hsa05221	Acute myeloid leukemia	66	-0.599754853584529	-1.57597333581398	0.00205966555946102	0.00895267963179055	0.00635966909587963	4560	tags=56%, list=22%, signal=44%	1147/10000/8900/3551/2322/5914/6932/5604/3845/2475/4893/8517/208/5594/207/5292/6654/369/5467/2885/5290/861/5371/8503/6774/4790/890/6776/5293/1050/11040/3684/597/2209/6688/1436/929
hsa05202	Transcriptional misregulation in cancer	156	-0.603842769801635	-1.63537863883947	8.8492149280307e-06	5.24517103006911e-05	3.72598523285503e-05	3973	tags=44%, list=19%, signal=35%	2322/5914/1025/7403/2530/3207/2120/5327/2130/3205/3576/1643/171558/581/2005/1655/8148/7048/1051/2321/3206/6935/64919/8013/7030/3486/1031/2078/7490/64332/4286/4300/861/4208/5371/55589/5468/4299/5090/4790/890/4086/26471/4094/578/7185/4005/3087/4066/958/3569/2313/3695/1026/1050/330/5328/3684/597/2209/6688/1436/929/942/51513/4318/3002/3560
hsa05160	Hepatitis C	136	-0.609417043939324	-1.64612376468057	1.72949739698646e-05	9.89151142837872e-05	7.02658222229034e-05	4560	tags=54%, list=22%, signal=43%	1147/10000/1017/7189/5519/5010/3551/7187/1871/10197/5604/7534/29110/6041/9021/637/3845/7186/3456/4893/1950/8517/841/208/3454/581/5594/207/8737/7132/1869/6654/369/8717/148022/2885/3455/7297/1870/4792/5290/3716/8837/3949/5610/8503/6774/7533/4790/10062/7124/578/836/355/9641/5293/3458/10379/6773/7098/1026/9071/356/4600/3665/23586/6772/4938/4940/3434/4599/91543/4939/3627
hsa04611	Platelet activation	111	-0.611231066188698	-1.63619711096361	0.000127619217778938	0.000660378809459266	0.000469109906622662	4895	tags=53%, list=24%, signal=41%	5908/2773/5331/1278/10000/60/10627/8773/6915/5906/7450/109/1432/5336/9138/3709/6786/3690/84876/208/5594/207/5600/64805/5584/10125/2771/10672/5290/2149/5742/5603/3688/9002/1277/10235/8605/7094/5567/146850/8503/1281/4638/196883/5023/5739/113/5293/4067/23533/5294/6916/5330/695/2212/83706/54518/3937/2207
hsa04933	AGE-RAGE signaling pathway in diabetic complications	99	-0.612735135888759	-1.6311450172093	0.000248009721306462	0.00122501771433192	0.000870209548443728	3535	tags=43%, list=17%, signal=36%	1432/3845/5336/6401/998/3576/4893/208/581/5594/1282/207/5600/5292/7048/4313/5290/5603/1277/4772/50507/7056/5579/8503/6774/1281/4790/7124/6776/836/5293/3717/3569/3553/5054/5330/2335/6347/7040/7412/6772/3383/1536
hsa04978	Mineral absorption	53	-0.614695136539146	-1.58141445978731	0.0050071110009465	0.0201520763741798	0.0143153270982226	4201	tags=47%, list=20%, signal=38%	4494/491/483/4489/4501/261729/65010/2512/2495/538/9843/26872/6546/10568/6523/1317/115019/7421/30061/4493/4499/4502/4496/4495/3162
hsa04657	IL-17 signaling pathway	83	-0.617668339766072	-1.63834517978671	0.000819409036493915	0.00376377360782123	0.0026736525467248	4738	tags=55%, list=23%, signal=43%	6374/257397/1147/7189/3551/7187/84818/6364/4322/8061/29110/29761/1432/1673/7186/3576/8517/841/5594/5600/23118/1051/8717/2920/4792/5603/2919/6361/23765/4790/7124/836/9641/6372/3458/3569/7128/3553/3934/6356/6279/6347/6280/6354/4318/3627
hsa05146	Amoebiasis	90	-0.621371165355279	-1.65042632746042	0.000299609979766667	0.00143636549123431	0.00102034358434469	3516	tags=42%, list=17%, signal=35%	81/911/5052/87/3576/1282/913/2920/5290/5878/1277/2919/5579/5567/3554/8503/3910/1281/4790/7124/912/836/338382/5293/3458/5272/3569/3586/3553/5330/2335/2769/7040/7099/7097/3684/929/3689
hsa03050	Proteasome	43	-0.622065219699065	-1.5702517561376	0.0100327285840043	0.0371666990725613	0.026401917326327	4395	tags=56%, list=21%, signal=44%	5684/5702/10213/5701/5718/5714/5686/10197/5709/5700/23198/5707/5720/5690/5713/5685/5687/5708/5717/5721/3458/5699/5696/5698
hsa04670	Leukocyte transendothelial migration	103	-0.622075081744093	-1.65793915829689	5.66948637861841e-05	0.000313263145666034	0.000222531133505094	2149	tags=41%, list=10%, signal=37%	7430/1432/81/5336/87/998/5600/4267/1003/2771/4313/1535/5290/5603/3688/2185/6494/5579/8503/83593/5293/7852/4478/399/3702/7409/3676/6387/9071/10451/5175/7412/3684/4688/653361/4689/5880/3689/3383/3683/1536/4318
hsa04936	Alcoholic liver disease	120	-0.625558968652656	-1.67593597493004	1.54351849858708e-05	8.98548268820334e-05	6.38297123475859e-05	4560	tags=55%, list=22%, signal=43%	1147/10000/31/51094/7189/8310/3551/7187/128/84818/51/5562/1374/6932/29110/9020/1432/3456/1375/3576/3929/8517/841/208/207/5600/23118/6720/8737/219/7132/8717/148022/2920/9663/3654/4792/4217/5603/2919/50507/720/217/23765/125/4790/7124/836/355/721/9641/4615/6319/3569/3553/356/718/728/7099/23643/717/929/719/712/714/713
hsa04666	Fc gamma R-mediated phagocytosis	91	-0.63233283221258	-1.67964312299089	0.000100615288490381	0.000529041678191359	0.000375812622544718	3487	tags=42%, list=17%, signal=35%	5336/1785/10096/10092/273/998/81873/3984/208/5594/207/85477/10095/9846/3985/5290/5058/8605/5579/2215/5337/8503/4082/5293/8877/4067/7409/10451/2213/3635/653361/2209/5880/7454/2212/3055/5788/2214
hsa05163	Human cytomegalovirus infection	203	-0.633496225690413	-1.73087344074804	3.88795055083622e-09	3.62134822735031e-08	2.57247855995178e-08	3762	tags=48%, list=18%, signal=40%	5604/9826/29110/109/11214/637/1432/3845/2923/51806/9138/2475/3709/7186/3456/3690/3576/4893/8517/841/208/581/5594/207/5600/5533/8737/7132/94235/1869/10488/6376/6654/8717/811/4773/2885/5732/2002/2771/10672/1870/3579/5156/4792/5290/5603/3716/2185/4772/5579/5567/3554/8503/6774/4790/414062/7124/196883/578/836/355/5733/113/5734/6892/5293/54331/2793/7852/3569/3685/1026/3553/6387/3570/3135/5330/356/6347/…
hsa05167	Kaposi sarcoma-associated herpesvirus infection	177	-0.635010396284294	-1.72769139476546	3.31319199650001e-08	2.76948869451026e-07	1.967347474305e-07	3805	tags=51%, list=19%, signal=42%	6932/2033/5604/29110/637/1432/3845/5336/51806/3091/9261/2475/3709/7186/3456/3576/4893/8517/841/208/3454/581/5594/207/5600/5533/7132/94235/1869/8717/148022/8678/2920/4773/3455/7538/7297/1870/4792/5290/5603/3716/4772/2919/100507436/1237/5610/1827/146850/8503/6774/3459/4790/578/131450/836/355/9641/1233/5293/7314/10379/54331/57580/2793/3717/3569/6773/7098/1026/4067/23533/5294/9976/3135/718/59345/4277…
hsa04210	Apoptosis	132	-0.637022049845598	-1.71869472856066	1.05984562389631e-06	6.51905044132448e-06	4.63090441424406e-06	3804	tags=45%, list=19%, signal=37%	2081/5604/9020/10018/637/10376/3845/3709/7186/4001/4893/8517/841/208/581/5594/207/332/9131/8737/7132/8717/3563/10039/840/4792/4217/5290/84790/4170/8837/1509/1508/8503/5366/4790/7124/839/1512/578/836/7185/355/843/1075/5293/1522/1513/1514/1519/330/356/597/1439/8743/1521/5551/1520/3002
hsa05161	Hepatitis B	148	-0.637638236218101	-1.72203176441007	5.69044419506693e-07	3.71016961518364e-06	2.63557415350469e-06	4560	tags=55%, list=22%, signal=43%	1147/10000/1017/7189/4775/8900/3551/7187/3339/1871/2033/5604/7534/29110/537/637/1432/3845/3456/3576/1643/4893/8517/841/208/3454/581/5594/207/332/5600/23118/1869/10488/7048/9134/6654/369/148022/4773/2885/2002/7297/1870/1959/3654/4792/5290/5603/3716/2185/4772/5579/8503/6774/4790/7124/890/6776/836/355/9641/843/4615/5293/3718/3717/6775/3569/6773/7098/1026/898/356/7040/7099/3665/23586/7097/64135/6772/…
hsa04142	Lysosome	129	-0.644270680695319	-1.73532215355847	1.02744716975153e-06	6.44130341036536e-06	4.5756756547639e-06	4747	tags=58%, list=23%, signal=45%	51606/2581/5538/26503/23335/26088/164/3073/8905/3373/256471/57192/8763/537/533/23431/1497/1213/4864/2588/2517/23062/4074/4669/2799/55353/3423/9114/23312/2519/1510/4758/175/3920/2717/2548/79158/3074/1777/6609/23659/4125/1509/4126/411/5476/2760/1508/3482/162/9516/950/1512/5660/135112/2629/53/410/4668/1200/3988/1075/6556/1522/1513/10312/5641/1514/1519/968/54/1521/1520/7805/27074
hsa05170	Human immunodeficiency virus 1 infection	189	-0.650890253258893	-1.77448659060919	9.46550611615498e-10	9.95404836731136e-09	7.07100626673717e-09	3538	tags=43%, list=17%, signal=36%	637/1432/3845/5336/2923/51806/2475/3709/7186/3456/4893/9133/8517/3984/841/208/581/5594/207/5600/23118/5533/8737/7132/94235/8717/3985/811/4773/2771/3654/4792/5290/5603/2185/5058/4772/5579/27350/8503/162/4790/7124/85363/578/836/9582/355/4615/200316/6892/5293/54331/2793/7852/164668/3135/684/356/59345/6891/7099/917/919/25939/3133/7097/200315/140564/5880/567/920/60489/3105/3107/7133/1234/3134/3106/689…
hsa05135	Yersinia infection	133	-0.655730274439439	-1.76962646108289	1.02965546406161e-07	8.27863124820439e-07	5.88084880401991e-07	4560	tags=56%, list=22%, signal=44%	1147/10000/60/7189/23396/4775/10097/1399/147179/3551/5604/29110/6197/1432/9138/10096/10092/7186/6195/3456/998/3576/81873/8517/3984/208/4210/5594/207/5600/23118/9815/3606/148022/10095/4773/391/3654/4792/5290/5603/3688/2185/4772/29108/58484/8503/4790/7124/114548/9844/4615/5293/3569/8935/3678/3586/3553/7409/3676/2335/10451/7535/926/6347/7456/7099/834/3932/5880/920/7454/2212/3937/925
hsa00590	Arachidonic acid metabolism	46	-0.662473091414628	-1.68755676065751	0.00167247654961802	0.00746886787911607	0.00530562135423163	1810	tags=35%, list=9%, signal=32%	5742/8644/8605/873/2687/247/2878/5320/2678/5740/1573/6916/5730/874/240/26279
hsa05166	Human T-cell leukemia virus 1 infection	213	-0.664777689287539	-1.81797112632411	1e-10	1.19273666521293e-09	8.47278225207766e-10	3107	tags=42%, list=15%, signal=36%	4085/64784/4893/9133/8517/4215/208/581/2005/5594/207/5533/7132/1869/10488/7048/9134/4791/811/4773/7538/896/2002/991/1870/1959/1031/4792/5290/996/5971/8850/3716/4772/7094/5567/3554/8503/8829/4790/7124/890/196883/6776/113/2113/5293/958/3718/3569/3600/1026/898/1030/3135/4049/3601/7040/3109/917/3108/3112/3133/3559/3932/1029/567/920/6688/3105/3115/3119/3107/3689/3111/3123/3383/3122/3118/3134/3683/3127…
hsa04630	JAK-STAT signaling pathway	130	-0.665499773591324	-1.79340815879524	1.79716805436846e-07	1.33153814937299e-06	9.45877923351819e-07	3315	tags=48%, list=16%, signal=41%	3581/282616/282617/2475/51561/3456/1950/53833/208/3454/3460/207/5292/6654/5159/11009/2885/3455/896/3563/7297/5156/5290/4170/3716/5777/3597/53832/3574/8503/6774/3459/6776/5293/3458/10379/282618/3718/3717/6775/3569/3600/6773/1026/9180/3586/9466/5008/3570/1438/3601/3594/3566/50615/3559/3575/8651/1439/1441/6772/3587/3560/3561
hsa05417	Lipid and atherosclerosis	189	-0.667391680227269	-1.81947353078028	1e-10	1.19273666521293e-09	8.47278225207766e-10	3672	tags=50%, list=18%, signal=41%	29110/3306/637/1432/3845/51806/9138/6401/7186/3456/998/3576/4893/3929/8517/841/208/581/5594/207/3310/5600/23118/5533/7132/3606/148022/2920/4773/3312/3309/1535/3654/840/4792/4217/5290/5603/817/3949/4772/2919/5468/9619/6403/29108/8503/6774/3303/19/25833/4790/414062/7124/839/5452/836/355/9641/114548/948/4615/10333/5293/958/3717/3569/959/4067/3553/7409/6648/1573/5330/10451/356/6347/6348/7412/7099/366…
hsa04625	C-type lectin receptor signaling pathway	98	-0.669148952279733	-1.78124291495254	3.44987213337518e-06	2.08270058422279e-05	1.4794773281531e-05	3634	tags=54%, list=18%, signal=45%	9020/1432/3845/5336/51806/9261/1263/3709/51561/93978/4893/8517/841/208/5594/207/5600/5533/64170/4791/4773/1959/4792/5290/5971/5603/5058/6367/4772/6361/602/29108/8503/1540/4790/7124/22808/9641/114548/5293/10379/3569/6773/3586/3553/30835/3659/4046/834/26253/6772/2207/64581
hsa04668	TNF signaling pathway	109	-0.669705581744395	-1.79290944949883	6.77852513118241e-07	4.33293959365778e-06	3.07796806782277e-06	4166	tags=58%, list=20%, signal=46%	3551/7187/6364/3726/5604/9020/1326/9021/1432/6401/7186/3456/8517/841/208/5594/207/5600/23118/8737/7132/8986/10488/6376/1051/8717/2920/840/4792/4217/5290/5603/8837/2919/602/8503/4790/7124/836/7185/355/6372/843/4323/5293/3569/3600/11035/7128/3553/330/64127/197259/4049/1435/3659/6347/7412/7133/3383/4318/6352/3627
hsa05134	Legionellosis	56	-0.676913795269892	-1.74242160775276	0.000277259145294648	0.00134905196068739	0.000958319119635862	3183	tags=55%, list=16%, signal=47%	51128/3576/841/9554/3310/3606/7100/1379/2920/4791/3312/840/4792/2919/29108/58484/3303/4790/7124/7415/836/4615/3569/3553/718/7099/834/7097/3684/929/3689
hsa04664	Fc epsilon RI signaling pathway	60	-0.68238793328876	-1.77236555250989	0.000210318067674795	0.00105482600095359	0.000749311334225992	3762	tags=47%, list=18%, signal=38%	5604/1432/3845/5336/4893/208/5594/207/5600/6654/9846/2885/5290/5603/8605/8503/7124/5293/4067/7409/10451/695/240/3635/241/5880/3937/2207
hsa04660	T cell receptor signaling pathway	97	-0.684813049194243	-1.82284739973507	5.41339006030725e-07	3.60156155032686e-06	2.55842279971556e-06	3634	tags=55%, list=18%, signal=45%	5604/9020/1326/1432/3845/998/4893/8517/208/5594/207/4793/5600/5533/84433/6654/4690/4773/2885/10125/4792/5290/5603/5058/5777/4772/940/8503/4794/4790/9402/7124/5293/3458/3702/959/3586/7409/10451/7535/926/917/29851/919/1493/3932/5133/920/3937/5788/925/915/916
hsa04217	Necroptosis	116	-0.68574379611153	-1.83928580536718	2.66688721819479e-08	2.2879085082408e-07	1.62524982826275e-07	3136	tags=47%, list=15%, signal=40%	7186/3456/841/3454/581/55072/3460/2512/9131/8737/7132/2752/8717/8878/148022/2495/3455/7297/5481/6609/3716/817/8837/8605/5610/51510/29108/6774/3459/90865/1540/7124/6776/355/114548/3458/10379/3718/3717/6775/6773/7098/11035/7128/3553/330/197259/356/7099/834/6772/81030/8743/1536
hsa04621	NOD-like receptor signaling pathway	156	-0.686949869577686	-1.86045639501481	1.95542981159319e-10	2.19817282268751e-09	1.56150474972959e-09	3365	tags=51%, list=16%, signal=43%	1673/24145/3709/22900/7186/3456/3576/22861/8517/841/199713/4210/3454/5594/55072/4793/837/5600/23118/8737/10628/64170/79792/79184/3606/148022/23710/2920/3455/7297/838/55669/10135/1535/4792/8767/5603/3716/2919/118429/29108/58484/1508/4790/7124/9641/7226/114548/4615/9051/10379/5027/3569/114769/6773/84674/11035/7128/3553/330/64127/51393/2635/5330/6347/3428/7099/3665/834/2634/9447/6772/4938/4940/2633/…
hsa04622	RIG-I-like receptor signaling pathway	52	-0.688995773866293	-1.77023351138792	0.000140644752346781	0.000716409207266414	0.000508911932833746	4659	tags=65%, list=23%, signal=51%	1654/1147/10010/7189/3551/7187/29110/1432/9755/7706/7186/3456/3576/54941/8517/841/4793/5600/8737/55593/8717/4792/5603/1540/4790/7124/9641/843/3665/23586/79132/64135/9636/3627
hsa04613	Neutrophil extracellular trap formation	102	-0.693864720907007	-1.84936317750079	1.06886410911213e-07	8.29642141834651e-07	5.89348631590646e-07	3829	tags=51%, list=19%, signal=42%	55869/7450/5604/1182/1432/5336/2475/3690/9734/208/5594/207/837/5600/79792/1379/1535/5290/5603/1184/6403/5579/2215/8503/2358/4790/5293/366/5330/51311/27180/718/51284/728/7099/834/7097/3684/4688/2357/653361/4689/2209/5880/2212/3689/64581/6404/3683/1536/2359/2214
hsa05235	PD-L1 expression and PD-1 checkpoint pathway in cancer	88	-0.702077971682496	-1.86228373184283	2.27169612468166e-07	1.6457176369916e-06	1.16905999398822e-06	3535	tags=56%, list=17%, signal=46%	1432/3845/3091/2475/4893/1950/8517/4215/208/5594/3460/207/4793/5600/5533/148022/4773/10125/4792/5290/5603/3716/5777/4772/940/8503/6774/3459/4794/55509/4790/4615/5293/3458/3717/7535/7099/917/919/29126/7097/3932/5133/920/10538/6772/116071/915/916
hsa05142	Chagas disease	98	-0.702923398772889	-1.8711488967484	1.0411775496208e-07	8.27863124820439e-07	5.88084880401991e-07	3121	tags=51%, list=15%, signal=43%	3456/3576/8517/841/208/5594/3460/207/5600/7132/7048/148022/811/2771/3654/4792/5290/5603/8837/8503/3459/4790/414062/7124/355/4615/10333/5293/3458/3569/3586/3553/5054/5330/2769/356/718/6347/6348/7040/7099/917/919/7097/712/915/714/713/916/6352
hsa05169	Epstein-Barr virus infection	184	-0.715712547777599	-1.9474939855071	1e-10	1.19273666521293e-09	8.47278225207766e-10	3136	tags=53%, list=15%, signal=45%	7186/3456/1643/8517/841/208/3454/581/5713/207/4793/5600/23118/8737/1869/9134/8717/4791/811/3455/896/7297/1870/5708/3654/4792/5290/5717/965/5971/5603/3716/930/953/5610/8503/6774/4794/4790/7124/890/578/836/355/9641/4615/6892/5293/10379/958/3718/3569/29760/6773/1026/7128/4067/898/864/3135/695/6891/960/3109/917/3108/3112/919/3133/3665/23586/7097/567/3105/3115/3119/3107/6772/3111/3123/3383/3122/4938/4…
hsa04662	B cell receptor signaling pathway	78	-0.716143565361797	-1.88857431378151	3.1933852539068e-07	2.21498636760344e-06	1.57344850136505e-06	3045	tags=59%, list=15%, signal=50%	4893/8517/208/5594/207/4793/5533/84433/6654/4773/2885/11027/4792/5290/23547/10990/11024/5777/930/4772/5579/8503/4794/4790/25780/79168/11025/5293/974/29760/4067/8519/7409/353514/971/10451/27071/2213/695/118788/3635/5880/10859/10288/11006/973
hsa05162	Measles	122	-0.720509155550336	-1.9363705684024	1e-10	1.19273666521293e-09	8.47278225207766e-10	3121	tags=54%, list=15%, signal=46%	3456/4179/8517/841/208/3454/581/207/3310/4793/23118/9134/8717/3312/3455/896/7297/9367/3654/4792/5290/3716/940/5610/8503/6774/103/3303/4790/6776/578/836/355/9641/4615/5293/10379/3718/3569/6773/4478/7128/898/3553/6504/30835/2213/356/51284/7099/917/4600/3665/3559/23586/7097/64135/6772/4938/4940/4599/915/3560/916/4939/3561
hsa04623	Cytosolic DNA-sensing pathway	46	-0.724702253177573	-1.84607677302339	5.81502169101923e-05	0.000315949511878711	0.000224439433688461	3121	tags=50%, list=15%, signal=42%	3456/8517/4793/8737/3606/4792/29108/90865/103/4790/9641/3569/11035/3553/388372/3665/23586/834/9447/81030/6351/6352/3627
hsa04062	Chemokine signaling pathway	179	-0.725916219298367	-1.97455289171032	1e-10	1.19273666521293e-09	8.47278225207766e-10	3115	tags=54%, list=15%, signal=46%	998/3576/4893/6464/8517/2869/208/5594/207/4793/9547/94235/56477/6376/6654/1524/2920/2885/2771/409/3579/4792/5290/2829/6369/10235/2185/5058/408/6367/2919/58191/1237/6368/6361/5579/5567/146850/8503/6774/4790/414062/196883/6372/9844/113/1233/5293/54331/57580/3718/2793/7852/3717/6773/6370/3702/4067/23533/6375/7409/5294/6387/6366/5330/10451/6356/1794/6347/59345/388372/6348/2268/729230/1236/6357/653361…
hsa04064	NF-kappa B signaling pathway	102	-0.726893606184632	-1.9373953289935	1.460123117283e-09	1.48750042573206e-08	1.05666804540217e-08	3179	tags=54%, list=15%, signal=46%	7706/7186/3576/3929/8517/23118/8737/7132/84433/128178/8717/148022/2920/4791/3654/4792/5971/8837/2919/5579/3554/1540/4790/7124/8792/7185/8740/4615/958/29760/959/7128/4067/3553/330/6387/5328/6366/4049/7535/388372/7412/695/7099/23586/3932/597/23643/6357/929/4050/6363/3383/6351/10673
hsa05133	Pertussis	72	-0.729619846174222	-1.92360994799878	2.3850048235596e-07	1.6902425488705e-06	1.20068892719247e-06	2347	tags=49%, list=11%, signal=43%	148022/2771/3654/840/5603/3688/29108/720/4790/7124/836/721/6372/114548/4615/710/3569/3678/3586/715/3553/718/3659/7099/3394/716/834/3684/23643/717/929/3689/712/714/713
hsa05152	Tuberculosis	159	-0.73000393431909	-1.98018486622359	1e-10	1.19273666521293e-09	8.47278225207766e-10	3538	tags=57%, list=17%, signal=47%	637/1432/1594/533/51806/1263/51561/3456/3929/841/208/581/5594/3460/207/5600/5533/64170/7132/9114/1051/3606/8717/1379/3920/3654/8767/5878/5603/3716/817/5993/1509/2215/3459/4790/7124/9902/836/3656/843/4615/7421/10333/3458/3717/3569/10312/3586/8877/3553/9103/4360/64127/30835/7096/2213/718/7040/3109/7099/11151/3108/3112/4261/4046/972/3687/7097/3684/26253/2209/2212/3115/3119/929/6772/3689/2207/64581/3…
hsa05164	Influenza A	148	-0.73468958857911	-1.98413259533867	1e-10	1.19273666521293e-09	8.47278225207766e-10	3179	tags=57%, list=15%, signal=48%	7706/3456/3576/8517/841/208/3454/581/5594/3460/207/4793/7132/3606/8717/148022/3455/896/7297/4792/5290/10241/3716/5371/5579/64499/5610/29108/8503/3459/7177/90865/103/56649/4790/7124/3838/578/836/355/9641/114548/4615/55916/5293/3458/10379/3717/3569/6773/7098/3553/356/51284/6347/3109/7099/4600/3108/3112/4261/3665/23586/834/64135/3115/3119/6772/3111/8743/3123/3383/3122/4938/4940/3118/3127/4599/91543/…
hsa04145	Phagosome	142	-0.735791716237669	-1.98625196121235	1e-10	1.19273666521293e-09	8.47278225207766e-10	2260	tags=47%, list=11%, signal=42%	811/3920/7037/23673/83547/1535/84790/2204/5878/3688/7057/81035/84617/2215/9902/338382/948/10333/10312/3685/3678/1514/715/9103/7058/4360/3135/30835/2213/718/6891/3109/7099/11151/3108/3112/3133/7097/3684/4688/653361/4689/4481/8685/4973/2209/2212/3105/3115/3119/929/3107/3689/64581/3111/3123/3122/3118/3134/3127/3106/1520/1536/6890/3113/3117/2214
hsa05145	Toxoplasmosis	107	-0.738745885197827	-1.97440601660153	1.02443639956939e-10	1.19273666521293e-09	8.47278225207766e-10	2970	tags=56%, list=14%, signal=48%	8517/841/208/5594/3460/207/3310/4793/5600/23118/7132/3655/3312/2771/7297/3654/4792/5603/3688/3716/3949/146850/6774/3459/3910/3303/4790/7124/836/4615/3458/958/3717/959/3586/23533/330/5294/7040/3109/240/7099/3108/3112/4261/7097/23643/8651/3115/3119/6772/3111/3123/1234/3587/3122/3118/3127/3113/3117
hsa04060	Cytokine-cytokine receptor interaction	236	-0.740311551838877	-2.02928682767319	1e-10	1.19273666521293e-09	8.47278225207766e-10	2766	tags=52%, list=13%, signal=46%	3460/8718/90/9547/392255/7132/56477/7048/6376/1524/3606/11009/2920/3455/7292/246778/3563/8742/3579/2829/6369/8741/8794/6367/2919/58191/1237/84957/943/6368/6361/3597/53832/3574/3554/970/8807/3459/90865/23765/414062/7124/8792/94/9235/355/6372/27242/8740/7293/1233/3604/3458/3624/8764/282618/958/7852/3569/3600/6370/959/3603/9180/3586/944/3553/9466/6375/5008/6387/8784/3557/3570/6366/1438/4049/6356/360…
hsa04380	Osteoclast differentiation	124	-0.744887970762925	-2.00476604925116	1e-10	1.19273666521293e-09	8.47278225207766e-10	3136	tags=65%, list=15%, signal=55%	7186/3456/3690/8517/208/3454/2355/5594/3460/207/5600/23118/5533/7132/7048/8878/9846/4791/4773/2885/3455/7297/11027/1535/4792/5290/23547/5971/10990/5603/4286/3716/11024/4772/5468/2215/3554/8503/3459/1540/4790/7124/8792/79168/10326/11025/5293/3458/10379/29760/1513/6773/140885/3553/9103/353514/54209/2213/1435/7040/695/126014/3932/4688/8651/54/653361/4689/55423/2209/2212/10859/7305/6688/1436/10288/67…
hsa04620	Toll-like receptor signaling pathway	88	-0.744951658130242	-1.97600752323942	7.6400161165753e-10	8.30215084667849e-09	5.89755630051426e-09	3121	tags=59%, list=15%, signal=50%	3456/3576/3929/8517/841/208/3454/5594/207/5600/23118/8737/7100/148022/3455/3654/4792/5290/5603/3663/8503/4790/414062/7124/9641/4615/10333/5293/941/958/3569/1513/7098/3553/6696/51311/7096/51284/388372/6348/7099/3665/7097/23643/929/6772/942/6351/6352/6373/3627/4283
hsa04514	Cell adhesion molecules	132	-0.745192039350813	-2.01053892892411	1e-10	1.19273666521293e-09	8.47278225207766e-10	1863	tags=46%, list=9%, signal=42%	965/3688/3680/23114/214/940/6403/9672/84628/1462/3384/941/958/3685/3695/959/3385/3676/9071/6693/3135/201633/923/926/5175/7412/3109/29851/3108/3112/29126/3133/1493/3684/5133/920/3105/3115/3119/3107/3689/3111/80380/3123/3383/942/6404/3122/5788/79679/3118/925/3134/3683/6402/3127/6614/3106/3113/3117/914
hsa04610	Complement and coagulation cascades	68	-0.74882283145916	-1.97431345104038	1.1018262587984e-07	8.35338047368089e-07	5.93394802780044e-07	1925	tags=54%, list=9%, signal=49%	4179/2153/966/5104/10544/1379/2149/7035/5345/9002/7056/720/3426/721/3075/710/5329/2162/715/629/5328/5054/2/1675/718/728/3687/716/3684/717/5265/3689/719/11326/712/714/713
hsa04650	Natural killer cell mediated cytotoxicity	101	-0.761501969340683	-2.02969059911507	1e-10	1.19273666521293e-09	8.47278225207766e-10	3121	tags=60%, list=15%, signal=51%	3456/4893/6464/3824/9437/3454/5594/3460/5533/6654/369/4773/2885/3455/5290/117157/3821/2185/5058/80328/5777/4772/100507436/5579/2215/8503/3459/51744/7124/836/355/3384/5293/259197/3458/7409/3135/10451/10870/356/7535/4068/4277/919/3133/3932/5880/7305/3105/3107/3689/3937/2207/8743/3383/5551/3683/3106/962/2214/3002
hsa05143	African trypanosomiasis	33	-0.767169635880544	-1.87967782449705	8.16361223820627e-05	0.000436284850763155	0.000309921430958651	1529	tags=45%, list=7%, signal=42%	5579/3910/7124/355/4615/3458/3569/3586/3553/5330/356/7412/3383/8542/3620
hsa04658	Th1 and Th2 cell differentiation	84	-0.772511087337185	-2.04747426784492	1e-10	1.19273666521293e-09	8.47278225207766e-10	2772	tags=57%, list=13%, signal=50%	5594/3460/4793/5600/5533/4773/7297/4792/5603/3716/4772/3459/4794/4790/4094/6776/3458/3718/3717/6775/30009/2625/864/7535/3594/3566/3109/917/3108/3112/919/3559/3932/920/3115/3119/6772/3111/3123/3122/3118/3127/3113/915/3117/3560/916/3561
hsa05323	Rheumatoid arthritis	85	-0.773545343162313	-2.04882851028227	1e-10	1.19273666521293e-09	8.47278225207766e-10	1274	tags=59%, list=6%, signal=55%	526/528/529/9114/3606/2321/2920/8741/2919/940/414062/7124/8792/6372/3458/941/3569/1513/3600/10312/1514/3553/6387/1435/6347/6348/7040/3109/7099/3108/3112/1493/7097/54/3115/3119/4050/3689/3111/3123/3383/942/3122/3118/3683/3127/10673/3113/3117/6352
hsa04659	Th17 cell differentiation	98	-0.781132880048376	-2.07933884299199	1e-10	1.19273666521293e-09	8.47278225207766e-10	2772	tags=61%, list=13%, signal=53%	5594/3460/4793/5600/5533/7048/196/4773/246778/7297/4792/5603/3716/861/4772/3554/6774/3459/4794/4790/6776/3458/3718/3717/3569/30009/2625/3553/9466/3570/7535/7040/3594/3566/3109/917/3108/50615/3112/919/3559/3932/50943/3662/920/10148/3115/3119/6772/3111/3123/3122/3118/3127/3113/915/3117/3560/916/3561
hsa05144	Malaria	46	-0.785027961831244	-1.99974800706939	3.26363055841113e-07	2.21654908758756e-06	1.57455860274221e-06	2484	tags=65%, list=12%, signal=57%	6382/3606/1311/1379/3082/4035/7057/6403/2532/7124/2995/948/4615/3458/958/3569/959/3586/3553/7058/3820/6347/5175/7040/7412/7099/7097/3689/3383/3683
hsa05140	Leishmaniasis	72	-0.802682794683371	-2.11623712956364	1e-10	1.19273666521293e-09	8.47278225207766e-10	2772	tags=72%, list=13%, signal=63%	5594/3460/4793/5600/23118/1379/2002/1535/3654/4792/5603/3688/3716/5777/5579/2215/3459/4790/7124/4615/3458/3717/3586/3553/9103/3676/718/7040/3109/7099/3108/3112/7097/3684/4688/653361/4689/2209/2212/3115/3119/6772/3689/3111/3123/3122/3118/3127/1536/3113/3117/2214
hsa04640	Hematopoietic cell lineage	85	-0.805398854256517	-2.13319639156975	1e-10	1.19273666521293e-09	8.47278225207766e-10	1483	tags=56%, list=7%, signal=53%	930/3574/3554/7124/931/912/948/945/3569/3678/3553/3676/3570/290/1438/1435/926/3566/960/3109/917/3108/3112/3559/3575/3684/921/2209/920/951/1441/3115/3119/1436/929/3111/3123/3122/3118/925/924/3127/3113/915/3117/916/952/914
hsa05416	Viral myocarditis	55	-0.809626332411103	-2.08275120500708	3.2310180615337e-09	3.0979761413529e-08	2.2006934165245e-08	1151	tags=51%, list=6%, signal=48%	836/941/958/959/3135/3109/3108/3112/3133/5880/3105/3115/3119/3107/3689/3111/3123/3383/942/3122/5551/3118/3134/3683/3127/3106/3113/3117
hsa04061	Viral protein interaction with cytokine and cytokine receptor	90	-0.816367744495462	-2.16835748667934	1e-10	1.19273666521293e-09	8.47278225207766e-10	2684	tags=70%, list=13%, signal=61%	9547/7132/56477/6376/1524/3606/11009/2920/3579/2829/6369/8794/6367/2919/1237/6368/6361/53832/8807/414062/7124/6372/8740/1233/8764/7852/3569/6370/3586/6375/6387/3570/6366/4049/6356/1435/6347/388372/6348/729230/3559/1236/6357/6362/6846/6354/1436/7133/6363/8743/1234/6351/3587/1230/2833/3560/6355/3561/6352/10563/6373/3627/4283
hsa04612	Antigen processing and presentation	61	-0.828236122310135	-2.15824892196416	1e-10	1.19273666521293e-09	8.47278225207766e-10	1757	tags=64%, list=9%, signal=59%	3821/5993/1508/3303/7124/5721/6892/3805/3458/10437/5641/1514/3135/926/6891/3109/3108/3112/4261/3133/972/567/920/3105/3115/3119/3107/3111/3123/3122/3118/925/3134/3127/3106/1520/6890/3113/3117
hsa05321	Inflammatory bowel disease	53	-0.847369380472727	-2.18001105166585	1e-10	1.19273666521293e-09	8.47278225207766e-10	1637	tags=68%, list=8%, signal=63%	4772/6774/8807/3459/4790/7124/4094/3458/6775/3569/3586/30009/2625/3553/64127/7040/3594/3566/3109/7099/3108/50615/3112/7097/50943/3115/3119/6772/3111/3123/3122/3118/3127/3113/3117/3561
hsa05340	Primary immunodeficiency	32	-0.864419147104728	-2.10973351614115	1.63134099312263e-08	1.43734368583237e-07	1.02103845942242e-07	1675	tags=72%, list=8%, signal=66%	5993/930/3543/958/3718/29760/959/7535/926/695/6891/29851/4261/3575/3932/920/5788/925/6890/915/916/3561/973
hsa05150	Staphylococcus aureus infection	61	-0.868777125997112	-2.2638921982544	1e-10	1.19273666521293e-09	8.47278225207766e-10	1569	tags=77%, list=8%, signal=71%	2204/3866/6403/2215/720/2358/3426/25984/721/3075/3586/715/9103/629/1675/2213/718/728/3109/5724/3108/3112/716/3684/2357/717/2209/2212/3115/3119/3689/3111/3123/3383/6404/3122/719/3118/3683/3127/3113/712/3117/2359/714/2214/713
hsa05322	Systemic lupus erythematosus	46	-0.884451149580648	-2.25301455453678	1e-10	1.19273666521293e-09	8.47278225207766e-10	1615	tags=74%, list=8%, signal=68%	940/2215/720/7124/721/3458/941/958/959/3586/715/6737/718/3109/3108/3112/716/717/2209/2212/3115/3119/3111/3123/942/3122/3118/3127/3113/712/3117/714/2214/713
hsa04672	Intestinal immune network for IgA production	39	-0.898007642143633	-2.23760606290545	1e-10	1.19273666521293e-09	8.47278225207766e-10	908	tags=77%, list=4%, signal=74%	941/958/7852/3569/3600/6370/3695/959/3586/3676/6387/3601/7040/3109/29851/3108/3112/608/3115/3119/3111/3123/942/3122/5284/3118/3127/10673/3113/3117
hsa05332	Graft-versus-host disease	32	-0.904980447915463	-2.20872893527932	1e-10	1.19273666521293e-09	8.47278225207766e-10	1757	tags=94%, list=9%, signal=86%	3821/940/7124/355/3458/941/3569/3553/3135/356/3109/3108/3112/3133/3105/3115/3119/3107/3111/3123/942/3122/5551/3118/3134/3127/3106/3113/3117/3002
hsa04940	Type I diabetes mellitus	37	-0.906422945159661	-2.24046505245145	1e-10	1.19273666521293e-09	8.47278225207766e-10	1269	tags=76%, list=6%, signal=71%	7124/355/3458/941/3553/3135/4049/356/3109/3108/3112/3133/3105/3115/3119/3107/3111/3123/942/3122/5551/3118/3134/3127/3106/3113/3117/3002
hsa05330	Allograft rejection	31	-0.924526502933641	-2.23470831152033	1e-10	1.19273666521293e-09	8.47278225207766e-10	1269	tags=94%, list=6%, signal=88%	7124/355/3458/941/958/959/3586/3135/356/3109/3108/3112/3133/3105/3115/3119/3107/3111/3123/942/3122/5551/3118/3134/3127/3106/3113/3117/3002
hsa05320	Autoimmune thyroid disease	32	-0.927814495510243	-2.26445856098373	1e-10	1.19273666521293e-09	8.47278225207766e-10	1132	tags=88%, list=6%, signal=83%	355/941/958/959/3586/3135/356/3109/3108/3112/3133/1493/3105/3115/3119/3107/3111/3123/942/3122/5551/3118/3134/3127/3106/3113/3117/3002
hsa05310	Asthma	21	-0.928610616254328	-2.11043921608124	2.97059472979792e-09	2.93458752095189e-08	2.08462788055995e-08	1269	tags=86%, list=6%, signal=80%	7124/958/959/3586/6356/3109/3108/3112/3115/3119/2207/3111/3123/3122/3118/3127/3113/3117
