# Supplementary material for: Identifying the Role of Oxidative Stress-Related Genes as Prognostic Biomarkers and Predicting the Response of Immunotherapy and Chemotherapy in Ovarian Cancer
Source: Oxid Med Cell Longev. 2022 Dec 12;2022:6575534. doi: 10.1155/2022/6575534 (PMC9764017; doi:10.1155/2022/6575534)
Supplement: Supplementary 6 — Supplement Table 5: signaling pathway analysis in regard to DUOX1. [file 6575534.f6.txt]

ID	Description	setSize	enrichmentScore	NES	pvalue	p.adjust	qvalues	rank	leading_edge	core_enrichment
hsa05310	Asthma	21	0.81928394148209	3.84517867159995	1e-10	7.6e-09	5.92105263157895e-09	843	tags=57%, list=4%, signal=55%	6356/3127/3123/3115/3117/3119/2207/3122/3108/3113/3112/3109
hsa05332	Graft-versus-host disease	32	0.764481399796024	4.30276284782659	1e-10	7.6e-09	5.92105263157895e-09	2342	tags=62%, list=11%, signal=55%	3002/3127/3123/3115/3117/3119/3122/3108/3113/3112/3109/5551/356/942/3458/3821/3553/3134/3105/3107
hsa05320	Autoimmune thyroid disease	32	0.73423790011969	4.13254208531974	1e-10	7.6e-09	5.92105263157895e-09	1311	tags=44%, list=6%, signal=41%	3002/3127/3123/3115/3117/3119/3122/3108/3113/3112/3109/5551/356/942
hsa05330	Allograft rejection	31	0.712510021594875	3.95491407406036	1e-10	7.6e-09	5.92105263157895e-09	1580	tags=48%, list=8%, signal=45%	3002/3127/3123/3115/3117/3119/3122/3108/3113/3112/3109/5551/356/942/3458
hsa04010	MAPK signaling pathway	275	-0.384186239493398	-1.29707348031402	0.000801400046680862	0.0101510672579576	0.00790855309224535	8550	tags=53%, list=42%, signal=32%	5908/2316/5599/783/5530/84867/7010/4790/5321/1944/2260/2254/7189/2885/5494/8569/5566/3305/5534/5532/4615/781/1326/1845/5155/778/8817/7157/2768/6300/5058/3312/9344/374/5924/6722/4233/9064/51701/5607/9020/3551/7046/5062/10125/8912/5609/369/1956/8913/8822/1850/774/5159/1399/6789/4217/782/23118/3727/5495/1147/5923/7048/255189/1943/5871/1852/80310/8491/5598/836/2002/1849/5922/1846/208/4775/6885/8550/9…
hsa05200	Pathways in cancer	485	-0.388601394424362	-1.3365667648657	3.31904850978832e-06	0.000100899074697565	7.86090436528814e-05	7004	tags=45%, list=34%, signal=30%	6256/653689/5155/4855/89780/1871/999/8817/54567/1284/840/7157/2768/11040/4292/5291/5743/613/7296/817/119391/6093/2947/2770/3326/4233/3918/8321/80326/6778/26060/3572/3551/7046/10125/369/8900/5371/5330/1956/5292/8822/109/5159/1399/3674/6789/1282/23566/3454/4436/596/1147/91860/51426/6257/3066/7048/1856/3280/5915/867/3673/81029/107/836/5295/2002/4437/10683/2956/208/9138/1288/6772/2946/10681/7849/6258…
hsa05205	Proteoglycans in cancer	191	-0.396960988195468	-1.32166698761054	0.00238639132654291	0.0213371459785013	0.016623468992946	4700	tags=55%, list=23%, signal=43%	2260/2017/5170/288/2885/1839/7409/5566/3688/818/3685/1975/7291/5501/7855/8326/3091/4313/89780/7157/6300/5291/5058/5962/817/6093/4233/8321/80326/369/2817/7410/1956/29102/4659/7074/867/3673/81029/836/5295/2002/1277/208/9138/8323/3678/9475/5290/2317/22808/1432/2549/7473/23365/4660/1655/5894/2064/6383/287/5567/6198/3693/54361/5727/3710/5293/8324/2099/6654/6548/10818/3709/7430/2719/5603/1499/5829/3708…
hsa05207	Chemical carcinogenesis - receptor activation	166	-0.400954290236634	-1.32576527111782	0.00382966666529808	0.0314653693581248	0.0245142247423063	7004	tags=46%, list=34%, signal=31%	6256/653689/778/8817/54567/5465/5291/1388/1545/119391/2947/2770/3326/3839/993/1956/8822/406886/23633/109/774/3840/9586/596/6257/402569/107/1385/5295/10683/208/2946/6258/3837/5290/3836/775/3725/7184/196883/5894/773/3841/6776/367/113/2353/5567/6198/85315/5293/405/2099/6654/6777/776/6196/114/3845/90993/111/2941/164091/28514/182/6714/2248/2475/5582/7367/5241/112/54852/595/2944/9314/79852
hsa04360	Axon guidance	172	-0.401643200547538	-1.33133531298403	0.00531687566626502	0.0404082550636142	0.0314815006555166	8488	tags=58%, list=41%, signal=34%	5336/5530/4917/2043/10154/1944/2242/5170/3688/818/5534/5532/3897/57689/2048/1947/659/57522/5291/5058/10298/5998/817/6093/2770/4233/2045/5590/25791/10507/5062/9860/6259/55558/56963/85464/7869/1943/9353/81029/5295/8440/5362/4775/84552/57556/3983/9475/5290/10505/2041/6585/23365/5365/10509/64221/5894/56920/54910/80031/1969/54361/5727/4776/5293/57715/1946/8482/5921/23654/223117/5361/2932/9901/91653/91…
hsa04510	Focal adhesion	192	-0.402882654696685	-1.34174530390706	0.00209041115341923	0.0204995158270789	0.0159708831755289	8099	tags=54%, list=39%, signal=33%	2909/5170/2885/7409/81/3688/329/3685/87/3675/5501/3672/3910/3914/5155/1284/5291/5058/10298/7094/6093/4233/3918/85366/5062/7410/4638/1956/23396/5159/3696/1399/3674/1282/4659/596/83660/5923/1292/80310/3673/5295/2002/3691/1277/208/1288/1291/8515/8395/3678/9475/5290/55742/3371/7059/2317/3725/1793/4660/5894/2064/1398/3915/5602/56034/3693/5293/8394/6654/7148/5156/3655/2932/1293/1499/5829/2889/2324/3679…
hsa03013	Nucleocytoplasmic transport	101	-0.41819242523081	-1.33831991699705	0.00598612244424827	0.0433281243583684	0.0337563295728286	5776	tags=47%, list=28%, signal=34%	4686/10482/9984/348995/23633/10526/51194/3840/10762/55705/59343/10527/4927/55161/26019/402569/9939/10250/22916/9972/23279/57122/3837/3842/7514/3836/11260/9670/55746/1917/3841/5976/4928/100101267/22985/57510/8021/9883/23511/5411/5903/7175/30000/65109/22794/23225/7919
hsa04921	Oxytocin signaling pathway	136	-0.418904554976937	-1.36784466384811	0.00294135598648835	0.024838117219235	0.0193510262268971	6373	tags=46%, list=31%, signal=32%	817/6093/2770/85366/5607/7226/4638/5330/1956/109/782/4659/57172/91860/5020/255189/107/5598/2002/4775/9475/6262/1827/5565/775/3725/196883/4660/27092/5894/4846/5997/113/10645/2353/5567/5564/3710/4776/57118/3709/776/114/3708/3845/23236/111/5563/784/8681/3768/9254/6714/4773/5582/4882/59285/5332/112/595/6261/1026
hsa05226	Gastric cancer	132	-0.429708988783237	-1.40047191734031	0.00120574033677733	0.0140978870146273	0.0109834646062712	7004	tags=50%, list=34%, signal=33%	6256/89780/1871/999/8817/7157/4292/5291/4233/8321/80326/7046/369/1956/8822/596/51426/6257/7048/1856/5915/81029/5295/208/6258/8323/5290/324/10023/1855/2549/7473/4041/5894/2064/6198/54361/5293/1857/8324/6654/2932/1499/8313/3845/9965/7483/25759/4040/7040/7482/4088/7042/7043/2248/7475/2475/7474/6932/595/11211/1026/51176/7481/2535/83439
hsa05206	MicroRNAs in cancer	189	-0.431338888365919	-1.43531445194663	5.92238776115174e-05	0.00112525367461883	0.000876669240959961	7341	tags=54%, list=36%, signal=35%	406992/659/599/406896/407011/5155/4855/89780/1871/442898/407014/7157/5291/5743/5962/10298/406976/1545/6093/6659/4233/9493/406900/23414/3551/993/1956/10642/5292/406886/5159/1399/407007/23405/596/6935/407006/4363/3066/1943/5581/5598/836/5295/472/131405/3678/5290/324/3371/648/4170/7473/4082/5894/2064/1398/4194/5293/442891/57521/1387/6654/7148/1946/5156/7430/10018/90427/4851/2033/406925/1789/27086/17…
hsa04925	Aldosterone synthesis and secretion	87	-0.432654551267732	-1.36982959201491	0.00568867929109876	0.0421794757193664	0.0328614336456283	7973	tags=61%, list=39%, signal=37%	5566/818/8536/483/490/3777/3991/221955/778/1388/817/481/25865/5587/8912/5330/8913/109/9586/57172/84876/91860/5581/492/107/1385/747/775/196883/113/5567/3710/23683/57118/3709/776/4929/482/183/114/3708/23236/491/90993/111/1583/477/5582/949/5332/112/6770/3164
hsa05017	Spinocerebellar ataxia	131	-0.433024516810586	-1.40975670674621	0.000718971276171434	0.00950292469374417	0.00740359437705138	5995	tags=44%, list=29%, signal=31%	11273/5289/22863/5330/5705/5718/5709/3516/489/4217/9821/5707/55102/6908/4976/6095/342371/5295/9698/23152/208/5717/2081/9706/5290/9776/487/23369/23130/773/55626/8678/116444/7436/6667/5602/2906/3710/55062/5293/11317/3709/30849/488/4800/2905/3708/23236/6310/6311/6712/3748/8408/2475/5582/5332/6261
hsa05165	Human papillomavirus infection	304	-0.433462936882716	-1.47014071539445	1.3805513319747e-07	6.99479341533845e-06	5.44954473147906e-06	5445	tags=42%, list=27%, signal=31%	5159/3696/3674/3516/1282/9586/3454/1147/245973/528/3066/1292/1856/23545/90423/6908/3280/3673/81029/836/1385/5295/472/3691/9794/1277/208/9636/1288/1291/6772/8515/5934/8323/3993/84552/3678/5290/324/7187/1855/3371/7059/8638/3716/5519/29110/7473/23493/545/535/5894/1739/9368/3915/10379/5567/55534/6198/3693/54361/5293/1857/1387/8324/11317/6654/7148/3655/2932/4851/2033/1293/27175/1499/5610/1108/54626/72…
hsa04935	Growth hormone synthesis, secretion and action	104	-0.433988540537017	-1.3924281680741	0.00457326979793704	0.0365861583834963	0.0285037591284165	4539	tags=41%, list=22%, signal=32%	107/1385/5295/3483/208/6772/5290/775/196883/5608/1432/5894/1398/6776/4214/113/2353/5567/5602/3710/6416/5293/1387/6654/6777/3709/776/2932/2033/5603/114/3708/3845/23236/90993/111/25759/2475/5582/5335/5332/112/3667
hsa05225	Hepatocellular carcinoma	161	-0.441167916030667	-1.45550385383229	4.23752009998994e-05	0.000990927777228417	0.000772017831981973	4814	tags=39%, list=23%, signal=30%	7048/1856/8193/81029/5295/2002/208/2946/8323/5290/324/10023/1855/114112/2549/7473/4041/5894/6601/6599/6198/54361/5293/1857/8324/6654/2932/55274/1499/55193/8313/3845/7483/196528/6597/25759/6602/2941/4040/7040/57492/8289/7482/4088/7042/7043/3480/7475/2475/5582/5335/7474/1021/6932/595/2944/11211/7039/1026/51176/7481/2535/83439
hsa01522	Endocrine resistance	93	-0.445416203812449	-1.41714849506773	0.00209041115341923	0.0204995158270789	0.0159708831755289	4539	tags=43%, list=22%, signal=34%	107/5295/10683/208/5290/3714/3725/196883/1432/5894/2064/6667/113/2353/5567/5602/10498/6198/5293/2099/6654/5469/4851/5603/114/3845/8202/111/25759/9611/28514/182/4193/6714/3480/2475/112/595/1026/4854
hsa04390	Hippo signaling pathway	146	-0.449064823031587	-1.47140582068416	9.64494067399505e-05	0.00162892331383028	0.00126907114131514	6200	tags=49%, list=30%, signal=35%	8321/80326/5590/8994/1741/7046/1454/4092/10413/55233/166824/7048/1856/122786/81029/92597/25937/7159/85409/8323/3993/84552/324/1855/126374/5519/84962/7473/23291/8945/1739/9231/1453/54361/1857/8324/353500/7005/654/2932/2736/1499/652/655/26524/8313/85407/7003/7483/9113/5522/7040/3996/656/7482/3397/4088/7042/7043/7475/1742/894/7474/154796/7161/6932/595/11211/51176/7481/2535/83439
hsa04350	TGF-beta signaling pathway	91	-0.449258313876928	-1.42769510574753	0.00246038649701664	0.0213702141455159	0.0166492319346991	6588	tags=52%, list=32%, signal=35%	7050/4090/6093/8200/5933/7046/130399/4092/56963/57154/92/7048/83729/2200/3625/5519/64750/6667/6198/269/60436/1387/353500/4093/79875/9765/654/7044/2033/4756/93/10637/4052/91/652/655/2331/3400/8646/9372/7040/656/3397/4088/7042/7043/25805
hsa04540	Gap junction	77	-0.449667594904861	-1.41301013923938	0.00702717482176607	0.0485513896776565	0.037825701791803	6450	tags=49%, list=31%, signal=34%	10383/2770/5607/5330/1956/109/10382/5159/80310/107/5598/7082/196883/5894/1453/113/5567/1902/56034/3710/10746/6654/5156/3709/7280/114/3708/3845/23236/111/7846/2697/6714/113457/5582/5332/112/347733
hsa04974	Protein digestion and absorption	84	-0.450191185179951	-1.42473847212514	0.00227539865847252	0.0209612482477468	0.0163306123813817	4342	tags=40%, list=21%, signal=32%	84570/1277/1288/6550/1291/3784/23428/4311/340267/1289/255631/2006/120103/169044/1307/1302/1296/6564/1293/80781/206358/1306/482/1299/1278/85301/477/136227/1287/1297/7373/1298/1280/1294
hsa05231	Choline metabolism in cancer	89	-0.451523577978705	-1.43298489535202	0.00216440610994993	0.0205618580445243	0.0160194531164057	4861	tags=45%, list=24%, signal=34%	204962/255189/80310/5295/1609/208/57153/8395/56994/5290/8525/1119/5337/3725/5894/8527/6667/2353/5602/56034/6198/5130/5293/8394/6654/5156/3845/7248/80736/5900/10810/8526/126969/8681/56261/9468/8936/2475/5582/5335
hsa04912	GnRH signaling pathway	84	-0.452024131057264	-1.43053927097394	0.0020164162653316	0.0204995158270789	0.0159708831755289	5808	tags=50%, list=28%, signal=36%	5609/5330/1956/109/3972/91860/255189/107/5598/2002/2797/4215/5337/775/3725/196883/5608/1432/4216/5894/4214/113/5567/5602/3710/6416/10746/6654/3709/776/5603/114/3708/3845/23236/111/8681/4323/6714/1958/5332/112
hsa04750	Inflammatory mediator regulation of TRP channels	87	-0.453302232178425	-1.4352023108158	0.00197941884935215	0.0204995158270789	0.0159708831755289	5056	tags=40%, list=25%, signal=30%	91860/255189/5581/107/5583/5295/1573/8398/9311/5290/196883/5608/1432/113/5567/5602/3710/5293/239/3709/5603/114/3708/23236/111/41/8681/6714/2150/5582/3554/5335/5332/112/59341
hsa04928	Parathyroid hormone synthesis, secretion and action	97	-0.455671409108029	-1.4561694020076	0.00102166173996351	0.0124234067579563	0.00967890069439115	6261	tags=55%, list=30%, signal=38%	5745/6256/2768/1388/2770/10893/632/4209/369/5330/1956/109/5144/9586/3727/596/6257/107/1594/1385/9138/6258/10672/5337/196883/4041/4326/5894/9368/6667/113/2353/5567/3710/4205/9826/3709/4929/114/860/3708/23236/90993/111/4040/5141/4323/11214/1958/5582/5332/112/1026
hsa00562	Inositol phosphate metabolism	71	-0.458799405307675	-1.43486769378331	0.00524251498949909	0.0404082550636142	0.0314815006555166	7692	tags=63%, list=37%, signal=40%	27124/8898/64768/55613/8776/5291/22908/9651/5289/51763/9896/55361/3612/5286/5330/3633/23396/64419/3706/9108/5298/3636/5297/84812/8395/9562/5290/4952/8396/8867/79837/5293/8394/56623/3631/200576/23236/5287/9110/51196/8871/5333/5335/5332/23007
hsa05414	Dilated cardiomyopathy	83	-0.459808611543766	-1.45269527475365	0.00135300362750368	0.0152338186207822	0.0118684528728393	5479	tags=48%, list=27%, signal=35%	109/3696/3674/489/782/7134/7139/3673/107/3691/1605/8515/3678/1756/6262/487/775/196883/27092/113/5567/3693/3655/776/488/183/114/111/3679/7040/784/3680/9254/7042/7043/3908/1674/59285/112/284217
hsa04550	Signaling pathways regulating pluripotency of stem cells	128	-0.467343605018302	-1.51865756547061	5.13552562475321e-05	0.00104079985994998	0.000810872467066296	4999	tags=48%, list=24%, signal=36%	92/5978/1856/1852/3976/81029/5460/83729/463/5295/208/10336/3625/8323/5290/324/1855/3716/648/1432/7473/56916/5894/5013/54361/5293/1857/8324/4093/6498/9869/3718/2932/7044/93/10637/5603/1499/91/652/3400/8313/3845/7483/6926/7994/1749/7482/3397/4088/3720/3480/7475/2264/7474/2261/6932/11211/7481/2535/9314
hsa05210	Colorectal cancer	85	-0.469283920133811	-1.48690306293172	0.000636542635145292	0.00879586186746222	0.00685273171807133	6798	tags=52%, list=33%, signal=35%	7157/4292/5291/374/26060/7046/369/1956/4436/596/51426/7048/836/5295/4437/2956/208/5290/324/3725/5894/2353/5602/6198/842/5293/6654/2932/10018/1499/8313/3845/5900/7040/4088/7042/7043/2475/6932/595/7039/1026/51176/83439
hsa04934	Cushing syndrome	141	-0.469706022088308	-1.53697053532458	7.29438803645544e-06	0.000201590360280223	0.000157056201741864	6373	tags=52%, list=31%, signal=36%	817/1394/2770/8321/80326/11091/8912/79798/4221/5330/1956/8913/109/9586/84876/54554/8622/1856/5087/81029/107/1385/5151/5929/8323/324/1855/775/196883/1586/9101/7473/6667/113/5567/54361/3710/1857/405/8324/3709/776/2932/4297/183/1499/114/8313/3708/23236/7483/90993/111/1583/7482/7475/8085/949/5332/112/7474/1021/6932/595/6770/51655/11211/1026/51176/7481/3164/2535/2516/83439
hsa04310	Wnt signaling pathway	153	-0.476021796942664	-1.56615638997304	1.41179495336135e-06	5.36482082277313e-05	4.17965611192505e-05	4180	tags=42%, list=20%, signal=34%	4775/6885/85409/8323/1501/27130/9475/324/10023/1855/3725/7473/23291/4041/7090/8945/144165/5467/80319/23500/5567/5602/54361/2239/4776/1857/1387/8324/64840/2932/2033/8549/1499/8313/85407/23236/7483/4040/57680/55366/7482/4088/7091/166336/4920/7475/4773/6425/5582/894/57216/5332/7474/25805/6932/595/54894/11211/51176/7481/2535/6422/83439/343637/147111
hsa04070	Phosphatidylinositol signaling system	89	-0.478895552183515	-1.51985439121987	0.000252911442712927	0.00384425392923649	0.00299500392686361	7487	tags=63%, list=36%, signal=40%	51447/8898/64768/55613/8776/8760/5291/22908/23262/5289/55361/3612/5286/5330/3633/23396/64419/3706/117283/91860/9677/9108/5298/3636/5295/5297/1609/84812/8395/5290/8525/4952/8396/8867/79837/8527/3710/5293/8394/3709/56623/3631/200576/9807/3708/23236/1040/5287/9110/51196/8526/8871/5333/5582/5335/5332
hsa04919	Thyroid hormone signaling pathway	115	-0.479945516836322	-1.54844019336815	2.30382203017518e-05	0.000583634914311046	0.000454701716481944	4217	tags=46%, list=21%, signal=37%	208/84812/6772/6258/9882/5211/5213/5290/6567/1827/487/1733/5894/25942/9862/5567/54361/842/5293/8648/5208/1387/2099/6548/2648/5469/2932/488/4851/2033/482/1499/652/3845/23236/8202/10499/51196/9611/23389/9968/477/4193/6714/9969/5333/2475/5582/5335/5332/595/2626/4854
hsa04916	Melanogenesis	91	-0.483361223659676	-1.53607052337401	0.000175713452177056	0.0028114152348329	0.00219033389140375	4792	tags=44%, list=23%, signal=34%	1856/434/81029/107/1385/8323/1855/196883/7473/5894/113/5567/54361/4254/1857/1387/8324/4286/3815/2932/2033/1499/114/3845/23236/7483/90993/111/7482/7475/5582/5332/112/7474/6932/11211/51176/7481/2535/83439
hsa05224	Breast cancer	136	-0.504508806807623	-1.64736733238476	1.08547816793543e-07	6.59970726104742e-06	5.14173869022046e-06	4792	tags=46%, list=23%, signal=35%	1856/3280/81029/5295/10683/208/8323/5290/324/10023/1855/3714/3725/7473/23493/4041/5894/2064/6667/2353/6198/54361/5293/1857/8648/8324/2099/6654/3815/2932/4851/1499/8313/3845/9965/8202/7483/2324/25759/4040/672/28514/182/7482/23462/2248/3480/7475/2475/5241/7474/1021/6932/595/26508/11211/1026/51176/4854/7481/2535/83439
hsa04512	ECM-receptor interaction	80	-0.511798729049292	-1.61299989250681	5.07940022335463e-05	0.00104079985994998	0.000810872467066296	5420	tags=52%, list=26%, signal=39%	3696/3674/1282/1292/22987/3673/3691/1605/1277/1288/1291/8515/3678/3371/7059/3915/3693/7148/3655/1293/255743/3679/1299/3913/1278/10319/7450/3680/3911/3912/80144/3908/1101/6382/1287/1297/9900/1298/3339/284217/1280/7060
hsa04913	Ovarian steroidogenesis	39	-0.514219016197076	-1.51449542822388	0.00638343488174733	0.0451294000942137	0.0351596780512399	5479	tags=54%, list=27%, signal=40%	109/3972/8644/255189/107/1573/122970/3643/196883/1586/113/5567/654/114/111/1583/8681/3480/949/112/6770
hsa04927	Cortisol synthesis and secretion	57	-0.52000317683548	-1.58938207620986	0.000440623308611294	0.00637854694370635	0.00496943581140558	5831	tags=58%, list=28%, signal=42%	8912/5330/8913/109/9586/84876/8622/5087/107/1385/5151/775/196883/1586/6667/113/5567/3710/3709/776/183/114/3708/23236/90993/111/1583/949/5332/112/6770/3164/2516
hsa04330	Notch signaling pathway	58	-0.529632107595078	-1.62339136328049	7.62206753251169e-05	0.00136300501757856	0.0010618979534459	7675	tags=72%, list=37%, signal=45%	23220/7088/8850/4853/4855/54567/83464/5986/8650/5663/3516/3066/1856/3280/342371/10683/9794/6868/9253/151636/1855/3714/23493/7090/5664/55534/1857/1387/11317/2648/4851/2033/6310/9612/196403/1840/28514/182/23462/7091/26508/4854
hsa05217	Basal cell carcinoma	59	-0.587886769388712	-1.80497640978092	7.28699312943935e-07	3.16463701621366e-05	2.46552399116369e-05	3912	tags=51%, list=19%, signal=41%	8323/51684/324/1855/2735/7473/2737/54361/5727/1857/8324/2932/2736/1499/652/8313/7483/6608/7482/7475/8643/374654/7474/6932/11211/1026/51176/7481/2535/83439
hsa04340	Hedgehog signaling pathway	47	-0.609468721209289	-1.83591021335254	3.22876876558953e-06	0.000100899074697565	7.86090436528814e-05	5133	tags=70%, list=25%, signal=53%	596/57154/84455/84976/339745/57758/1954/51684/2735/23291/64750/8945/2737/1453/5567/23288/5727/4036/50937/132884/2932/91653/2736/11127/53944/6608/23432/55733/8643/894/374654/2121/595
