# Supplementary material for: Identifying the Role of Oxidative Stress-Related Genes as Prognostic Biomarkers and Predicting the Response of Immunotherapy and Chemotherapy in Ovarian Cancer
Source: Oxid Med Cell Longev. 2022 Dec 12;2022:6575534. doi: 10.1155/2022/6575534 (PMC9764017; doi:10.1155/2022/6575534)
Supplement: Supplementary 7 — Supplement Table 6: signaling pathway analysis in regard to FOXO1. [file 6575534.f7.txt]

ID	Description	setSize	enrichmentScore	NES	pvalue	p.adjust	qvalues	rank	leading_edge	core_enrichment
hsa00130	Ubiquinone and other terpenoid-quinone biosynthesis	11	0.578816320034211	1.74243203444793	0.0184135384921765	0.0359233450338168	0.0171233422206873	3018	tags=45%, list=15%, signal=39%	1728/51805/3242/79001/84274
hsa00790	Folate biosynthesis	21	0.559447676723384	2.12849164326455	0.000784439036860168	0.00196418593481522	0.000936255460487892	1761	tags=38%, list=9%, signal=35%	8644/57016/5805/5092/873/8836/5860/231
hsa03050	Proteasome	43	0.515573441022097	2.33961897610723	1.26954504262422e-05	5.17583748146796e-05	2.46713206663815e-05	3394	tags=53%, list=17%, signal=45%	5683/5691/5694/5686/5693/5720/5721/5685/5688/5692/5704/5714/5715/11047/5702/5682/5689/5690/5684/9861/5710/5695/10213
hsa00260	Glycine, serine and threonine metabolism	34	0.466078633237501	2.05169451773412	0.00105660466968784	0.00256488767145598	0.00122258796653314	2312	tags=32%, list=11%, signal=29%	26227/2593/2653/5723/6472/51268/4129/27232/55349/2628/9380
hsa05204	Chemical carcinogenesis - DNA adducts	40	0.438710401072766	1.91089597360402	0.000869743219580704	0.00214401816919895	0.00102197489693694	3056	tags=42%, list=15%, signal=36%	2938/4257/2939/2950/2947/4259/873/373156/2941/6799/1544/9446/2052/1577/119391/2948/6817
hsa00650	Butanoate metabolism	23	0.43035755175959	1.6922348032167	0.0241290678572672	0.0465032944158241	0.0221664164047622	3809	tags=48%, list=19%, signal=39%	3158/1892/2571/38/35/5019/622/64064/18/3033/79944
hsa03030	DNA replication	36	0.386186431998745	1.69175672549558	0.00621686236528849	0.0130063304747483	0.00619964113989988	2978	tags=33%, list=15%, signal=29%	56655/10535/6742/84153/6119/5982/5425/5111/5557/5427/5984/4175
hsa00480	Glutathione metabolism	54	0.370671439704721	1.76100652807956	0.00145471909804753	0.00345224382969487	0.0016455581313342	2663	tags=35%, list=13%, signal=31%	2938/494143/4257/2939/2950/3418/2947/4259/2877/373156/2876/79017/2941/9588/2678/9446/2879/119391/2882
hsa00980	Metabolism of xenobiotics by cytochrome P450	48	0.366607411197759	1.71967765063714	0.00373644213675489	0.00830901118523115	0.00396060116078545	2582	tags=33%, list=13%, signal=29%	2938/4257/2939/2950/2947/27294/4259/873/373156/2941/874/1544/9446/2052/1577/119391
hsa04260	Cardiac muscle contraction	71	0.349073380361788	1.6648471750535	0.000625856652508381	0.00160501947981988	0.000765053972506	1535	tags=27%, list=7%, signal=25%	1347/27089/1329/1337/1349/7137/10975/9377/1340/1351/29796/1345/483/9167/1537/1327/1350/778/440567
hsa00983	Drug metabolism - other enzymes	58	0.337041404159843	1.64497374700249	0.00434345406716592	0.00946039995451207	0.00450942599619245	3078	tags=34%, list=15%, signal=29%	2938/4830/4257/2939/2950/4832/2947/3251/4833/4259/654364/2941/1854/9446/119391/7378/4831/2948/2990/6241
hsa04024	cAMP signaling pathway	187	-0.416565867444439	-1.27385723378773	0.0175906061534674	0.034744178613681	0.016561276796988	4350	tags=30%, list=21%, signal=24%	5338/10846/112/10257/7074/2906/488/9475/775/208/51806/1385/817/5291/5727/2550/5144/5020/3725/2771/6548/5594/1906/56670/5290/115/5732/7409/4881/1387/493/4792/3991/2737/5465/64764/2033/27198/489/64411/6662/5733/5142/113/4772/5141/4790/7410/5350/1080/5293/2149/10000/2353/5880/90993/1909
hsa05168	Herpes simplex virus 1 infection	462	-0.425675013860532	-1.34331417358256	1.07678180767464e-05	4.44696902390306e-05	2.11970718120503e-05	9070	tags=64%, list=44%, signal=37%	342892/7769/125893/147923/7733/7132/126295/7692/5295/6429/25833/7539/374900/349075/255403/285268/84874/162967/7643/7553/25799/6426/3654/10794/90592/7565/8517/84503/90333/90233/7673/340385/3460/8427/90317/3551/51427/65251/91661/1616/51135/9668/79230/79898/7699/55786/207/6431/7766/147929/27153/158431/7770/79088/57711/10795/171392/29990/121274/7556/55900/596/7748/57677/81856/3109/80110/163087/5970/5…
hsa04921	Oxytocin signaling pathway	136	-0.42636727886047	-1.28901303459469	0.0182284368711786	0.0357817464508321	0.0170558473648455	7587	tags=53%, list=37%, signal=34%	5534/5604/1827/196883/6093/783/2773/3845/93589/8681/111/10645/818/5532/4659/2776/54776/57118/1938/5565/23236/71/9254/146850/27092/5567/5533/5021/4846/5743/29904/5562/782/112/2977/9475/775/60/51806/817/5598/6714/5579/952/5331/5020/3725/2771/8605/5594/4775/5578/4660/115/4881/1956/4208/3768/781/1026/5330/5294/23533/4773/4638/5997/113/5530/4772/595/3710/2353
hsa04140	Autophagy - animal	136	-0.430792060143041	-1.3023902354993	0.0123673426070194	0.0248912338546339	0.0118647390766875	8177	tags=62%, list=40%, signal=37%	4218/207/8878/5601/26100/115201/596/10533/10670/29110/5604/9706/7249/9140/5516/22863/29982/3845/84335/81671/9451/9342/5580/89849/5728/83452/10645/9110/6794/9821/55014/6885/1514/9776/440275/1509/81631/6198/5602/5567/5289/5562/8897/598/23130/51100/208/7879/8408/55102/7189/5291/30849/1613/1508/5170/57521/3146/5594/8837/2081/23710/1612/2475/7248/338382/55626/5290/53349/55062/79065/58476/140775/22808/…
hsa04910	Insulin signaling pathway	126	-0.439233711824785	-1.32197042848	0.0126418190393606	0.0252836380787213	0.0120517837912475	5473	tags=43%, list=27%, signal=32%	5834/5565/9322/32/8569/6198/5602/3632/8835/3099/5567/5562/868/6655/31/6654/3636/867/5792/2885/208/51806/2319/23265/2872/5291/2932/10580/5573/2997/5170/57521/5594/25759/2475/7248/2194/79660/5290/1399/3101/5770/3643/3667/3991/6464/2889/6720/5584/5293/10000/9021/8660/2308
hsa05225	Hepatocellular carcinoma	161	-0.445278443941784	-1.35350840809081	0.00413123460294416	0.0090602248533534	0.00431867718928464	5780	tags=47%, list=28%, signal=34%	8313/8312/7477/4040/10023/1499/4089/6198/8324/71/2949/55274/6599/51426/1855/6655/598/7046/4609/4233/6654/6597/4088/1871/2885/60/6601/208/4087/5336/6934/5291/2549/5579/2932/7481/4041/7472/5594/25759/2475/1452/5578/55193/5290/54361/57492/8289/1956/8325/324/5335/6464/3480/7042/1857/7474/1026/7483/7855/7043/1021/3162/6595/80326/7157/595/4616/5293/8321/10000/7048/5925/7040/7476/3481
hsa05132	Salmonella infection	244	-0.449985387339193	-1.39359628593856	9.30652563073903e-05	0.000298936883896466	0.000142492258461076	6200	tags=48%, list=30%, signal=34%	140735/5869/840/6885/6416/3606/5868/391/5063/3799/10006/837/9648/10640/10333/841/5286/1499/58484/7280/51164/10097/388/5602/998/84617/71/5878/29109/1639/257397/3840/9266/23191/5289/8767/27072/4615/63916/4609/112574/8797/10096/10454/1778/10810/399/9475/60/208/7879/23265/6934/57617/5606/7189/5291/1781/1432/23339/7186/5600/55770/10392/5287/2317/5420/3725/834/9844/9842/5609/5594/64746/23118/338382/302…
hsa04934	Cushing syndrome	141	-0.453283269448309	-1.37403285827502	0.00294429734247484	0.00659356728807746	0.00314291191487307	4492	tags=44%, list=22%, signal=35%	898/8622/8313/8312/7477/1499/185/54554/8324/23236/5567/1855/1386/9101/112/5087/1871/775/2767/1385/6934/817/4297/2932/8913/196/6667/7481/5331/2771/7472/5594/8912/57552/51655/54361/8085/115/1388/405/1956/8325/324/1857/64764/7474/1026/7483/5330/7855/1021/80326/113/595/3164/3710/1030/8321/3949/5925/90993/7476
hsa04211	Longevity regulating pathway	81	-0.454677411940928	-1.33345263122401	0.0253036437246964	0.0484732452075508	0.0231054197612953	5873	tags=58%, list=29%, signal=42%	196883/7249/3845/27244/84335/111/10645/6794/9821/9776/10891/83667/10919/5565/6198/847/5567/1386/5562/26060/112/208/1385/8408/5291/57521/79813/2475/7248/5290/115/1388/3479/3643/3667/3480/64764/2309/7157/113/4790/6648/5293/10000/90993/8660/2308
hsa04916	Melanogenesis	91	-0.457977765676987	-1.35566363979252	0.0138942412478281	0.0276148044800584	0.0131629653926793	3739	tags=34%, list=18%, signal=28%	3815/51806/1385/4286/6934/817/5579/2932/7481/5331/2771/7472/5594/5578/1906/54361/115/1387/8325/1857/64764/2033/7474/7483/5330/7855/80326/113/8321/90993/7476
hsa04713	Circadian entrainment	83	-0.463548955526506	-1.36316306080771	0.011676314734831	0.0238017184979246	0.0113454070297953	5109	tags=39%, list=25%, signal=29%	23236/55970/5567/9722/112/2977/2906/775/51806/1385/817/5579/8913/59345/5331/2788/2771/2782/5594/8912/5578/51655/115/5592/5330/54331/8864/113/5187/8863/3710/2353
hsa00564	Glycerophospholipid metabolism	78	-0.463890473098998	-1.35673646842499	0.0232588312164445	0.0450994410172521	0.0214972509317587	7286	tags=54%, list=35%, signal=35%	9791/10162/1609/8681/56894/10390/2819/3931/122618/10554/151056/5337/129642/9663/79143/8760/9926/9489/5338/23761/10555/8398/5322/23646/5130/23659/56261/8527/8525/162466/1606/8605/375775/23175/54947/154141/64900/56895/10908/160851/26279/5320
hsa04530	Tight junction	154	-0.464663194280345	-1.41135063252101	0.000719690247447605	0.0018163611007011	0.000865792778884337	5452	tags=46%, list=27%, signal=34%	137075/5565/8189/2017/9414/910/10097/5602/998/123720/71/8777/84552/5567/1739/7430/5562/23513/9181/10096/7074/100506658/9475/60/55114/57530/11149/6714/7082/3996/23370/3725/154810/4214/9074/84952/5609/51762/56288/4771/2064/81/51421/5010/9693/7408/87/7277/4734/911/4217/913/83700/4628/861/4629/79778/909/4478/595/58494/5584/3059/11346/4627/1080/3688/7454/79784/9076/10686
hsa04020	Calcium signaling pathway	206	-0.468859906651858	-1.43994581316766	5.8095838185476e-05	0.000192442463989389	9.17302708191727e-05	4796	tags=38%, list=23%, signal=29%	5567/5533/5021/4846/491/2263/5023/6546/5136/56848/4233/5154/219931/2906/5153/488/775/2767/51806/57192/5336/7852/57105/6915/817/7134/2066/5579/8913/952/2247/5331/80228/7422/8912/5578/444/3357/2064/5027/113026/552/115/80271/1956/8817/493/5335/2185/5330/56034/489/53373/624/2321/147/3791/3274/3707/8877/5733/4638/113/5530/80310/2252/5350/7424/2246/2769/5155/3710/3269/2149/5156/5724/1909/5159
hsa05170	Human immunodeficiency virus 1 infection	189	-0.469779450882438	-1.43591378801222	0.000128229659672964	0.000389130945471919	0.000185484462588402	4283	tags=39%, list=21%, signal=31%	4615/598/27350/10454/23291/3105/8945/164668/2767/208/51806/5336/7852/5606/7189/6891/5291/1432/7186/5579/164/3134/59345/5600/567/85363/2788/3725/2771/356/2782/5609/5594/3107/4775/2475/5578/6890/23118/8451/355/919/162/8737/5290/25939/917/1399/5335/4792/3106/3133/5829/2185/6892/54331/4773/5530/915/4772/4790/1234/7097/3710/5293/7099/920/10000/3985/2353/916/7133/5880/7124
hsa04750	Inflammatory mediator regulation of TRP channels	87	-0.473204395459937	-1.39708815459857	0.0083618030692754	0.0173794338302587	0.00828413926367842	4190	tags=39%, list=20%, signal=31%	112/8398/2150/51806/5336/5606/817/5291/1432/6714/5579/5600/5331/8605/5578/5583/3357/5290/5029/115/5732/3479/5335/5330/3556/624/5734/3553/51393/113/3554/3710/3269/5293
hsa04152	AMPK signaling pathway	110	-0.476697182838904	-1.42805854432387	0.00272481408566235	0.00618922056600448	0.00295017464913818	6679	tags=53%, list=33%, signal=36%	92335/5862/10645/3156/6794/5521/5520/6885/5210/5523/5208/5529/10891/1938/5565/32/200186/23216/6198/29904/5562/31/9230/51719/208/1385/8408/5526/5291/2997/5170/57521/2475/7248/51552/2194/5290/79966/81617/3479/3643/3667/3991/3480/64764/948/6720/5209/2309/8900/6319/595/1080/5293/10000/90993/8660/2308
hsa05418	Fluid shear stress and atherosclerosis	134	-0.481316616170819	-1.4522582489824	0.00043279097449245	0.00117630367426153	0.00056070085764204	3663	tags=37%, list=18%, signal=31%	60/208/92/51806/5291/1432/5598/6714/5600/90/3725/7422/5609/858/1906/2817/5290/3685/659/4205/4208/4217/6382/1003/652/3162/3690/653361/3791/3553/7157/4790/857/10365/6347/4688/5175/5155/3554/7056/5293/10000/2353/1843/5880/7124/7412/3383/4318/4313
hsa04915	Estrogen signaling pathway	112	-0.481633374022801	-1.44572839950501	0.00161393960153335	0.00374622476852267	0.00178568807238419	4902	tags=41%, list=24%, signal=31%	3860/5567/4846/1386/8648/6655/112/2852/6654/3868/2885/208/51806/1385/5291/2289/2550/6714/6667/5331/3725/2771/5594/10499/25759/3310/2099/5290/115/1388/8202/3861/1956/1839/6464/64764/5330/113/3710/5293/10000/2353/90993/3872/4318/4313
hsa05160	Hepatitis C	136	-0.485202228981159	-1.46688554347481	0.000180789758206289	0.000527441679904586	0.000251412121503675	4289	tags=62%, list=21%, signal=50%	24146/5970/8717/7122/29110/5604/5610/1147/5516/27102/3845/9451/9071/836/4600/3455/23586/7529/5521/5520/369/440275/7532/10197/841/1499/137075/975/3458/7534/6655/4609/7297/6654/3454/7098/7533/100506658/1871/2885/208/7189/5291/91543/7186/2932/4940/6772/356/8554/9074/6041/5594/8837/7187/4939/355/57506/9641/8737/317/5290/6773/5010/1956/6774/4792/3627/5465/1026/1021/3716/148022/6256/7157/595/4790/5293/…
hsa05131	Shigellosis	215	-0.485212514731811	-1.49239337002391	5.77221819748575e-06	2.5853033616908e-05	1.23231937796582e-05	5421	tags=47%, list=26%, signal=35%	58484/2017/10097/472/54874/6198/5602/23236/998/71/7335/257397/5747/3099/9266/7316/5289/8767/4615/63916/598/9181/1729/10096/10454/25851/23291/8945/3611/9475/5481/60/208/5336/55072/7189/23048/5291/30849/1432/10241/6714/7186/2932/5600/10392/5331/57521/3725/10892/834/9844/5594/824/4303/2475/23118/10318/9564/9267/113026/81/8737/5290/55062/1399/87/831/1793/3101/1956/8678/5335/4792/7100/10163/5829/9265/…
hsa04144	Endocytosis	239	-0.485752373483111	-1.50301109878402	8.81310753506618e-07	4.75011558669669e-06	2.26420603933904e-06	7513	tags=64%, list=37%, signal=41%	3306/9727/409/9744/3305/60682/58533/26052/3312/58513/119016/10109/92421/3304/23096/55040/64145/112936/5590/378/3135/1785/9135/23527/84612/9372/5869/377/10015/5868/5337/22841/3303/3799/9146/137492/10938/64750/9765/2060/30011/26119/9798/8027/10097/51652/89853/832/10254/3579/55738/998/5878/6642/84552/23550/7037/6455/8394/9266/8723/2263/23624/9525/83737/1173/161/868/55616/9101/5338/28964/7046/10096/6…
hsa05210	Colorectal cancer	85	-0.488541916307388	-1.43838023321287	0.00582119384457425	0.0122592029309577	0.00584351281713972	5780	tags=49%, list=28%, signal=36%	8313/8312/1499/4089/6198/5602/51426/26060/6655/7046/4609/6654/27113/4088/2885/4437/208/4087/6934/5291/5900/2932/3725/5594/2475/5899/5290/1956/324/7042/1026/7043/374/7157/595/4616/5293/10000/2353/7048/5880/7040
hsa05120	Epithelial cell signaling in Helicobacter pylori infection	68	-0.489251776105834	-1.41766785135345	0.0122143984717051	0.0247399918089314	0.0117926475355383	5164	tags=50%, list=25%, signal=38%	3579/5602/9020/998/245972/528/28964/523/4233/5781/5336/1432/6714/7082/5600/10392/3725/4067/102/526/535/1956/1839/2921/5335/4792/6868/83700/2920/3576/4790/58494/6352/2919
hsa04270	Vascular smooth muscle contraction	116	-0.491870804223074	-1.47391759463071	0.000647642351168593	0.0016476021413729	0.000785351566890757	4411	tags=41%, list=21%, signal=32%	3779/27345/112/8398/2977/5322/9475/775/2767/51806/9826/10203/5579/5331/23365/133/10268/8605/5594/10672/5578/5583/1906/4660/552/115/4881/2768/5592/9138/5330/5739/4628/147/4629/4638/800/113/3778/26279/4627/5320/3710/79784/72/59/1909
hsa04210	Apoptosis	132	-0.494013024017965	-1.48810688612271	0.000299978326649687	0.000836781648022811	0.000398863149007894	4245	tags=39%, list=21%, signal=31%	598/8797/331/84823/27113/60/208/5291/7186/7185/1508/843/5170/3725/356/5594/8837/824/2081/355/6709/8737/317/5290/4000/1522/7277/597/8795/4792/4217/4170/153090/330/1521/3002/8743/7157/1519/4790/5551/4616/5783/3710/5293/143/1520/10000/2353/1439/7124/1513
hsa05203	Viral carcinogenesis	161	-0.494125678307373	-1.50198885515788	4.85975358173308e-05	0.000166172219246357	7.92082077837649e-05	5204	tags=45%, list=25%, signal=34%	22938/8379/998/1642/5922/894/5567/245972/1739/7534/10013/9261/1386/3516/23513/7874/3105/7533/2885/1385/1654/8850/6722/5291/1237/9759/5966/6714/7186/7185/3134/3725/5594/3107/7187/4067/10014/81/1233/5934/5290/1388/87/1387/23352/4791/6774/4792/3106/3133/5829/64764/2033/6777/1026/6776/1021/3572/3716/2934/1960/8900/7157/595/4790/3718/1234/1030/1959/5293/5925/90993/718
hsa04071	Sphingolipid signaling pathway	115	-0.495291660896788	-1.48519737264485	0.000491476307703397	0.001302412215414	0.000620812178151659	7341	tags=63%, list=36%, signal=40%	596/5970/8717/5604/6093/2773/5516/5581/3845/253782/259230/5728/5590/2776/340485/5521/5520/55304/5337/5523/29956/1509/5529/427/5602/23236/4846/56848/5338/4363/9475/81537/208/9517/9294/5526/8439/5291/1432/7186/5579/5600/8879/1903/5331/5170/2771/140/10558/9846/6609/5594/10672/5578/8698/1901/5290/2768/166929/4217/5330/624/8877/2205/2207/7157/4790/5293/130367/10000/5880/7124
hsa04217	Necroptosis	116	-0.495802869869382	-1.48570024302045	0.000454776553613871	0.00122558427160348	0.000584191112581601	5597	tags=47%, list=27%, signal=34%	823/2495/841/5834/6775/51652/3458/5602/2752/9525/54822/3717/7297/8797/331/6778/3459/3454/7098/91782/5481/55072/817/7186/6772/356/834/3146/8605/1540/6609/8837/824/355/8737/90865/6773/197259/8795/6774/11035/114548/6777/6776/330/3716/3553/8743/148022/3718/7099/7124/7128/1536
hsa04022	cGMP-PKG signaling pathway	146	-0.500348516826032	-1.51749678415221	5.14066115037796e-05	0.000173907472959595	8.28953197821306e-05	4865	tags=42%, list=24%, signal=32%	146850/5533/4846/491/6546/1386/3779/27345/112/2977/488/9475/775/2767/208/51806/1385/6722/9569/5331/2771/140/5594/4775/10672/152/3764/115/2969/1388/7408/4881/2768/4205/493/4208/3643/3667/5592/64764/5330/489/150/4209/5294/624/147/23533/4773/4638/5997/113/5530/4772/3778/5350/3710/10000/90993/1909/8660
hsa04371	Apelin signaling pathway	129	-0.500760420753775	-1.5057640354928	0.000128486632938841	0.000389130945471919	0.000185484462588402	5705	tags=47%, list=28%, signal=34%	10891/81631/5565/4089/185/6198/23236/55970/146850/5567/4846/999/5289/6546/56848/5562/7046/112/4088/208/4087/51806/9759/30849/59345/5331/2788/2771/6548/2782/5594/10672/2475/10014/5346/115/22808/4205/182/4208/8678/3991/4854/5330/4209/54331/5294/6696/23533/8877/4638/113/595/10365/3710/10000/187/1958/59/5054
hsa04360	Axon guidance	172	-0.501685488660208	-1.52983477954667	7.71890914767173e-06	3.36248371090357e-05	1.6027727718309e-05	5097	tags=51%, list=25%, signal=38%	998/5062/1947/84552/5747/1949/5533/57522/6259/5998/4233/8440/25791/5781/5362/2051/3611/9475/5336/6405/7852/5364/817/5291/5727/91584/6714/2932/54910/57556/57689/85464/5170/2771/9353/23365/23380/5594/4775/4756/10512/22885/56920/5578/8633/56288/10507/55558/2050/5290/54361/10501/9423/22854/659/6091/223117/5335/5921/54434/7474/6586/2049/10154/1946/23654/8829/1808/64218/4773/25/5530/2048/3983/9037/8482…
hsa05224	Breast cancer	136	-0.501697920330102	-1.51675607111067	3.40584986416467e-05	0.000120340028533818	5.73616819227733e-05	5780	tags=54%, list=28%, signal=39%	8313/8312/7477/4040/10023/1499/54567/6198/8324/8600/51426/1855/8648/6655/4609/6654/26508/1871/3815/2885/208/6934/4855/5291/2932/2247/6667/3714/7481/4041/3725/7472/5594/25759/675/2475/1452/2099/2064/28514/5290/54361/8202/4853/1956/4791/8817/8325/182/3479/324/6464/3480/4854/1857/7474/1026/7483/7855/1021/80326/7157/595/4851/2252/2246/4616/5293/8321/10000/2353/5925/7476
hsa04142	Lysosome	129	-0.501885815311898	-1.5091480462515	0.000111448082922294	0.00034745578793421	0.000165619442113625	6332	tags=53%, list=31%, signal=37%	53/22901/10312/23062/537/1514/1509/256471/8905/427/26985/2760/6556/245972/3074/5641/2517/26503/55353/9516/79158/5476/4668/27074/2799/57192/23431/3373/6448/8546/1213/135112/4126/23659/164/4864/26088/138050/950/968/1508/23163/1657/3423/3988/23335/6609/2588/5660/162/54/535/4125/1510/1522/411/8943/9583/3916/1203/2548/1521/1200/1519/20/3482/1520/7805/1513
hsa05226	Gastric cancer	132	-0.502455232145349	-1.51353720361973	0.000121908823171207	0.000376378696781008	0.000179405932924413	6017	tags=55%, list=29%, signal=39%	369/898/6257/8313/8312/7477/4040/10023/1499/5243/4089/6198/8324/999/51426/2263/1495/1855/6655/7046/4609/4233/6654/4088/1871/2885/208/4087/6934/5291/2549/2932/2247/7481/4041/7472/5594/5915/25759/2475/1452/3728/2064/5290/54361/1956/8817/8325/324/6464/7042/1857/7474/1026/7483/7855/7043/80326/6256/7157/595/2252/2246/4616/1030/5293/8321/10000/7048/5925/7040/7476
hsa04912	GnRH signaling pathway	84	-0.502728428124771	-1.47870973979398	0.00155102839453599	0.00362666933428268	0.00172870037781101	5137	tags=46%, list=25%, signal=35%	4216/5602/23236/998/5567/10746/5338/6655/112/6654/775/2885/2767/51806/5606/817/1432/5598/6714/5579/5600/5331/3725/4214/8605/5609/5594/5578/115/4215/1956/1839/2185/5330/113/3710/1958/4323/4313
hsa04012	ErbB signaling pathway	82	-0.505668458376837	-1.48365850721741	0.00293959822767811	0.00659356728807746	0.00314291191487307	5171	tags=52%, list=25%, signal=39%	6198/5602/5062/5747/868/6655/4609/6654/8440/867/2885/208/5336/817/5291/2549/2066/6714/5579/2932/3725/27/5609/5594/25759/2475/5578/2064/5290/1399/685/1956/1839/5335/6464/6777/1026/6776/10718/374/25/5293/10000
hsa04218	Cellular senescence	152	-0.506608689245921	-1.53956562653765	3.11813260239943e-05	0.000111411928939665	5.31059840030182e-05	4486	tags=41%, list=22%, signal=32%	9261/54822/7046/4609/23291/3105/132660/8945/4088/1871/5481/208/4087/51806/204851/5606/5291/1432/3134/5600/10114/28996/5594/3107/4775/824/2475/7248/5934/5290/22808/3106/678/3133/7042/3569/1026/677/7043/1021/83593/3576/4773/2309/8900/7157/5530/4772/595/4790/4616/2113/3486/3710/1030/5293/10000/7048/5925/7040/5054/2308
hsa00310	Lysine degradation	55	-0.510129759301225	-1.45578621566792	0.00960010579085419	0.0196957009128493	0.00938821890582685	5759	tags=53%, list=28%, signal=38%	79709/10919/1962/219/8424/93166/85007/217/9739/29072/9869/4297/5352/2122/5351/10157/79813/9757/23067/84444/8085/58508/2145/55904/7799/64324/83852/55870/80854
hsa04931	Insulin resistance	98	-0.510692231003181	-1.5224453384644	0.000258242236220833	0.000733223492127007	0.000349500770825187	5733	tags=50%, list=28%, signal=36%	8473/10891/5834/5565/32/200186/6198/5602/6513/4846/5562/5781/5792/208/1385/5291/5579/2932/2997/5170/6197/133522/2475/9882/22877/6195/79660/5290/5770/3643/3667/6774/4792/5465/64764/948/3569/6720/28965/4790/6196/5293/10000/9021/9945/7124/90993/8660/2308
hsa04550	Signaling pathways regulating pluripotency of stem cells	128	-0.51092263960158	-1.53674306451817	4.6396673231857e-05	0.000160371109649245	7.64430314117553e-05	5780	tags=50%, list=28%, signal=36%	8313/8312/7477/6929/1499/4089/5978/8324/10336/2263/1855/3717/3231/4609/3399/56916/4088/2885/208/4087/92/9869/5291/1432/2932/3720/2247/5600/4093/90/7481/7472/5594/463/9314/6498/7994/6926/5290/54361/659/3397/8325/3479/324/6774/3480/1857/7474/7483/652/7855/3625/3572/4086/3716/80326/3718/5293/8321/10000/3976/3624/7476
hsa04066	HIF-1 signaling pathway	102	-0.511123998676006	-1.52347085276354	0.000271953864476186	0.000765321494720593	0.000364800712478535	5269	tags=48%, list=26%, signal=36%	8453/8569/6198/3458/6513/7010/3099/7037/4846/3459/208/5336/7428/2872/817/5291/5579/7422/5594/2475/5578/1906/2064/5290/284/1387/405/3091/3101/1956/3479/3643/5335/6774/3480/2033/3569/1026/3162/2321/5209/230/4790/3570/5293/7099/10000/1536/5054
hsa04540	Gap junction	77	-0.51239005315732	-1.49747348599367	0.00133350603832625	0.00318838285855448	0.00151978527517989	5109	tags=47%, list=25%, signal=35%	23236/84617/5567/10746/6655/112/2977/1453/6654/5154/2885/2767/5598/6714/5579/7082/5331/2771/5594/5578/3357/115/7277/1956/5592/5330/56034/113/80310/10382/1902/5155/2697/3710/5156/5159
hsa04014	Ras signaling pathway	209	-0.512996707612066	-1.57578833298204	1.21193787811103e-07	7.41146625460207e-07	3.53277438153822e-07	5116	tags=45%, list=25%, signal=34%	5602/998/5062/5878/7010/5922/55970/5567/2263/5228/10125/5338/6655/598/8036/8398/4233/6654/5154/7074/5322/5781/3815/2885/208/51806/5336/115727/5291/5900/5966/9771/2549/5579/2247/59345/55770/2788/356/2782/9846/7422/8605/27/2114/5594/4303/25759/5578/7535/8831/5899/5290/6789/284/22808/8844/4763/1956/8817/3479/3643/5335/6464/3480/5921/56034/1946/54331/83593/2321/3791/64926/1435/5924/25/80310/4790/2252…
hsa05130	Pathogenic Escherichia coli infection	184	-0.513361536425646	-1.56711454359307	7.55022445821172e-07	4.13960582364022e-06	1.97319840650179e-06	5490	tags=52%, list=27%, signal=38%	841/137075/7280/2017/10097/5602/998/84617/5062/71/257397/7430/9266/23191/2846/4615/9181/4691/8797/4645/10096/10454/8440/10802/10810/100506658/5781/9475/147179/60/9826/7189/1432/4644/6714/7186/7082/5600/10458/3725/356/834/9074/23365/5594/4641/10672/23118/355/9267/8737/10427/5010/57121/4430/7277/64005/2768/4643/8795/4792/7100/10163/9265/114548/9138/3569/9632/4628/4642/3553/4629/8743/3576/25/4790/27…
hsa05211	Renal cell carcinoma	65	-0.514428923955489	-1.48382311963317	0.0048891524240356	0.0104345669184116	0.00497377569100054	5269	tags=58%, list=26%, signal=44%	369/5063/112399/8453/998/5062/6513/9915/6655/4233/6654/5781/2885/208/7428/5291/7030/2549/201163/3725/7422/5594/5290/1399/1387/405/3091/7042/2033/1026/7043/2889/2034/2113/5155/5293/10000/7040
hsa05165	Human papillomavirus infection	304	-0.518323100704008	-1.61886374413099	1e-10	1.44545454545455e-09	6.88995215311005e-10	4492	tags=42%, list=22%, signal=34%	1855/5743/3516/23513/6655/3659/528/7297/523/6654/5663/3105/3454/7098/26508/2885/4799/208/1385/6934/5526/4855/1101/5291/3695/8516/9794/2932/3134/3996/7481/6772/356/7472/7422/5594/3107/7187/2475/7248/1452/56288/355/3911/3913/9641/5934/4242/5290/54361/6773/526/535/7450/131873/3685/1387/23352/4853/1956/8325/182/3672/324/7148/3955/3106/4854/3133/5829/1857/64764/2033/7474/1026/7483/3915/7855/3673/3381/…
hsa05218	Melanoma	65	-0.519111099114546	-1.49732842508481	0.00413116087116886	0.0090602248533534	0.00431867718928464	4130	tags=43%, list=20%, signal=35%	4233/5154/1871/208/4286/5291/2247/5594/5290/1956/8817/3479/3480/1026/56034/1021/7157/595/80310/2252/2246/4616/5155/5293/10000/5156/5925/5159
hsa05200	Pathways in cancer	485	-0.521635498806096	-1.64753347649348	1e-10	1.44545454545455e-09	6.88995215311005e-10	5318	tags=51%, list=26%, signal=39%	4089/10928/8453/185/7175/4149/6198/3458/8324/5602/23236/998/2949/6513/9915/55970/9002/5747/894/5567/3563/999/51426/2263/1495/5228/10125/1855/11040/5743/8648/2846/26060/5338/6655/3717/598/7046/4609/112/7709/4233/3574/6654/331/6778/3459/7704/27113/3454/5154/26508/4088/867/1871/3815/51561/9475/2885/4437/2767/208/4087/51806/5336/115727/4286/7428/9826/7852/6934/7189/4855/817/5291/5900/5727/238/7186/55…
hsa04621	NOD-like receptor signaling pathway	156	-0.525100547804192	-1.59545827822586	1.49885462350839e-06	7.81370115206015e-06	3.72450501786383e-06	4475	tags=43%, list=22%, signal=34%	8767/54822/4615/598/7297/10454/331/3454/55072/7189/1432/7186/4940/5600/10392/1508/22900/5331/6772/3725/834/3428/6041/9447/5594/7187/23710/4939/23118/10910/9927/57506/5027/9641/8737/6773/10628/9051/2921/4792/11035/114548/7158/3569/115361/5330/84674/330/3716/2920/3553/51393/3576/148022/4790/115362/2634/6347/3710/7099/118429/6352/7124/7128/2919/84168/1536
hsa04015	Rap1 signaling pathway	196	-0.525255857862097	-1.60710168711195	1.85798722741869e-08	1.23091653816488e-07	5.86732808658534e-08	5109	tags=49%, list=25%, signal=37%	23236/998/71/26037/7010/84552/9002/999/2263/5228/2846/51466/112/4233/5909/5154/7074/3815/60/208/51806/25865/5606/5291/5900/1432/9771/6714/5579/2247/5600/5331/2771/7422/5594/5578/56288/9564/5899/23094/5290/115/9693/1399/57121/284/7408/22808/7409/1956/8817/3397/3479/3643/1500/5335/3480/5330/56034/7094/1946/3690/2889/9732/83593/2321/64411/3791/1435/57568/113/80310/2252/7410/5584/7424/2246/5587/2357/…
hsa04370	VEGF signaling pathway	56	-0.525983535224714	-1.50132046796559	0.00454253687931415	0.00976031572717501	0.00465238485505859	5097	tags=52%, list=25%, signal=39%	998/5747/5533/4846/9261/5743/56848/208/5336/5291/1432/6714/5579/5600/7422/8605/5594/25759/5578/5290/5335/5829/3791/4773/8877/5530/5293/10000/5880
hsa04722	Neurotrophin signaling pathway	115	-0.526004131376003	-1.57729276625712	3.46214363210606e-05	0.000120984799451618	5.76690205926285e-05	4486	tags=45%, list=22%, signal=36%	9261/8767/11108/6655/6654/5663/5781/2885/208/51806/5336/7189/817/4145/5291/1432/2549/5598/2932/5600/5170/3725/356/4214/5609/5594/6197/25759/6195/9500/5290/4215/1399/4794/57498/3667/5335/4792/4217/6464/397/3656/2889/2309/25/7157/11213/4790/6196/5293/10000/10019
hsa05166	Human T-cell leukemia virus 1 infection	213	-0.528654970725374	-1.62605662193698	5.43024791664434e-09	4.42774060895615e-08	2.11054170039618e-08	4266	tags=53%, list=21%, signal=42%	6929/706/64682/4089/200186/472/8379/5602/9020/4049/6513/894/5567/5533/1739/1386/29882/598/7046/4609/112/331/3105/2005/4088/1871/996/208/4087/1385/8850/6722/5291/23373/8295/3134/567/3725/3601/4214/2114/5594/3107/4775/3123/3932/8881/5290/115/4215/917/1388/1387/958/3115/4791/3122/4792/3106/3133/7042/64764/2033/6777/3569/1026/7094/6776/7043/8829/3716/3119/5971/4773/8900/3111/7157/113/5530/8061/3127/9…
hsa04928	Parathyroid hormone synthesis, secretion and action	97	-0.529418634190458	-1.57685115489833	0.000208078442114217	0.00060153585993019	0.000286730102052126	5109	tags=52%, list=25%, signal=39%	23236/8600/5567/4929/1386/64386/5338/112/5744/2767/1385/9826/5579/6667/5144/4041/5331/2771/5594/10672/408/5578/115/1388/1956/2768/4205/1839/4208/860/9138/64764/1026/5330/4209/11214/2625/6256/5142/113/5141/7421/3710/2353/9935/10568/1958/90993/4323/4322
hsa05217	Basal cell carcinoma	59	-0.530705960916349	-1.5216425852807	0.00271035821258657	0.00618922056600448	0.00295017464913818	3511	tags=39%, list=17%, signal=32%	6934/5727/2932/7481/2736/7472/650/51684/54361/8325/324/1857/2737/7474/1026/7483/652/7855/80326/7157/4616/8321/7476
hsa05222	Small cell lung cancer	91	-0.531339003674738	-1.57282082596444	0.000149252135165397	0.000443571766192489	0.000211434406923927	4245	tags=48%, list=21%, signal=39%	51426/5743/598/4609/7709/331/1871/208/7189/5291/7186/7185/5915/7187/3911/3913/317/5290/3685/4792/1026/3915/3673/1021/330/6256/3910/3918/7157/3914/595/4790/3909/4616/3912/3675/3688/1030/5293/1284/10000/1282/5925/2335
hsa04010	MAPK signaling pathway	275	-0.534304442024136	-1.66119978034312	1e-10	1.44545454545455e-09	6.88995215311005e-10	5212	tags=51%, list=25%, signal=38%	4149/8569/4216/5602/9020/998/5062/7010/5922/55970/9254/27092/5567/5533/10746/2263/5228/10125/9261/1386/782/6655/4615/7046/4609/1326/4233/10454/6654/5154/9064/2005/51701/3815/775/2885/208/115727/2872/5606/7189/6722/994/1432/5598/2066/23162/7186/5579/8913/2247/5600/2122/2317/3725/356/4214/7422/8605/5609/5594/8912/6197/4775/408/5578/23118/3310/355/1845/2064/6195/6789/4215/9693/1399/284/22808/5778/47…
hsa05223	Non-small cell lung cancer	72	-0.535984299386959	-1.55950425739923	0.000579963589898966	0.00151170837367108	0.000720575987449967	4289	tags=47%, list=21%, signal=37%	6655/4233/6654/1871/2885/208/5336/5291/238/5579/5170/5594/5915/5578/2064/5290/6789/1956/5335/6774/6777/1026/6776/1021/83593/6256/2309/7157/595/3718/4616/5293/10000/5925
hsa05231	Choline metabolism in cancer	89	-0.537287175754822	-1.58665486641397	0.000179234076422603	0.000527441679904586	0.000251412121503675	4350	tags=47%, list=21%, signal=37%	5338/6655/6654/5154/10810/57153/2885/208/5130/5291/5900/6581/56261/8527/8525/5579/1606/6667/5170/3725/8605/5594/2475/7248/23396/5578/5290/3091/1956/5335/160851/10163/56034/80310/5155/7454/5293/10000/2353/5156/5880/5159
hsa05100	Bacterial invasion of epithelial cells	67	-0.537794309740309	-1.55606979624707	0.00052535180116274	0.00138067663446076	0.000658117958829357	5456	tags=55%, list=27%, signal=41%	1499/2017/10097/998/71/5747/999/79658/1495/63916/10096/4233/867/3611/60/5291/1213/2549/6714/9844/858/25759/9564/5290/1399/1793/1759/6464/10163/5829/7414/857/3059/3688/5293/3678/2335
hsa04390	Hippo signaling pathway	146	-0.539314601126826	-1.63567622434034	6.00858940496727e-07	3.35216040487648e-06	1.5978520301298e-06	5780	tags=57%, list=28%, signal=41%	8313/8312/7532/7477/1499/4089/353500/8324/654/71/84962/92597/84552/85407/894/1739/999/7534/1495/1855/23513/7046/4609/1453/23291/27113/23286/7533/7005/8945/4088/60485/60/4087/6934/25937/1454/2932/3996/126374/9113/7481/2736/7472/650/392255/56288/4771/1742/54361/7159/659/3397/8325/324/7042/1857/7474/7483/652/7855/7043/330/4092/4086/9231/80326/374/595/5584/2246/122786/286204/7003/8321/85409/7048/7040…
hsa04310	Wnt signaling pathway	153	-0.540994847711172	-1.64375338710045	8.03038414404279e-08	5.21155542409307e-07	2.48415750105727e-07	5780	tags=55%, list=28%, signal=40%	8313/8312/7477/4040/4919/10023/22943/1499/284654/7088/4089/283106/8324/5602/23236/6425/85407/894/5567/5533/6259/1855/59343/4609/57680/5663/23291/8945/4088/51701/9475/6907/6934/817/1454/5579/2932/23002/7481/4041/5331/166336/3725/1457/7472/79718/4775/1452/5578/54361/144165/1387/5467/8325/324/59352/1857/6422/2033/7474/7483/5330/7090/7855/27123/80326/4773/7157/5530/8061/4920/4772/595/23500/57216/8321…
hsa00562	Inositol phosphate metabolism	71	-0.541253961446161	-1.57351277197447	0.000829663581858922	0.00206119546118076	0.000982496346938198	5603	tags=59%, list=27%, signal=43%	4534/5286/8867/4952/27124/23236/253430/3632/8394/5289/3612/3631/8897/200576/55361/56623/3633/8776/3636/5298/5336/5291/5287/5331/9651/8396/23396/8821/8871/5305/113026/5290/22876/80271/5335/9107/5297/5330/5294/3707/5293/3635
hsa05417	Lipid and atherosclerosis	189	-0.542653286373	-1.65865776919249	3.63453292992951e-09	3.12373370734483e-08	1.48896939376913e-08	4469	tags=53%, list=22%, signal=42%	6401/5602/23236/998/142678/5747/5533/4846/22926/3309/5451/3717/4615/598/8797/10454/9475/9619/208/51806/5606/7189/817/5291/1432/6714/7186/2932/5600/414062/5331/5170/3725/356/834/5609/5594/959/4775/2081/7187/4067/5578/23118/3310/355/9641/317/5290/5452/7409/6348/958/2921/8795/5335/6774/4792/23643/4217/4312/114548/9138/948/6403/3569/5330/4689/653361/2920/3553/8743/3576/148022/4773/6256/7157/5530/4772…
hsa05162	Measles	122	-0.542673006488372	-1.62977949360357	6.55225875552348e-06	2.89391428368954e-05	1.37942289589968e-05	4378	tags=47%, list=21%, signal=37%	868/4615/598/7297/64135/940/27113/3454/208/6504/7189/5291/103/2932/4940/6772/3725/356/1457/7187/4939/23118/3310/355/57506/9641/317/5290/6773/917/2213/6774/4792/6777/3569/6776/1021/3716/3553/51284/7157/915/4478/3559/595/4790/30835/3718/7097/5293/7099/10000/2353/916/3561/7128/3560
hsa05214	Glioma	73	-0.543782871582209	-1.58491840947249	0.000597916856022153	0.00154583382288654	0.000736842338615234	4289	tags=44%, list=21%, signal=35%	6655/6654/5154/1871/2885/208/51806/5336/817/5291/5579/5594/25759/2475/5578/5290/1956/3479/5335/6464/3480/1026/1021/7157/595/4616/5155/5293/10000/5156/5925/5159
hsa05206	MicroRNAs in cancer	189	-0.544434655863349	-1.66410264978045	2.89651615491783e-09	2.55858927017742e-08	1.21958574943909e-08	4310	tags=44%, list=21%, signal=35%	1789/6655/4609/4233/6654/4363/5154/7168/1871/2885/8434/407007/5336/4855/5291/9759/994/407040/5598/5579/57521/27086/7422/5594/2475/5578/10014/2064/407018/5290/5292/6659/1399/442891/1387/4853/1956/659/324/7148/3667/5335/6774/6464/4854/54541/7042/6624/2033/442903/1026/90427/4170/1946/1021/3162/3690/7431/4082/407010/1545/25/960/7157/595/4790/10253/4851/9839/406903/5155/6935/5293/6541/5156/23414/3678/…
hsa04070	Phosphatidylinositol signaling system	89	-0.544707874477582	-1.60856882280818	0.000101672606650396	0.000320117712027979	0.000152588383091787	5603	tags=58%, list=27%, signal=43%	4534/5286/8867/4952/8760/23236/253430/3632/8394/5289/3612/3631/23262/8897/9677/200576/55361/9807/56623/3633/8776/3636/5298/51806/5336/5291/8527/8525/5579/1606/5287/5331/8396/23396/5578/8821/8871/5305/113026/5290/22876/80271/5335/117283/160851/9107/5297/5330/3707/3710/5293/3635
hsa04923	Regulation of lipolysis in adipocytes	47	-0.544891490924287	-1.52251494822057	0.00539449685583793	0.0114363333343764	0.0054512810332678	4796	tags=47%, list=23%, signal=36%	5567/5743/112/208/5291/2771/5346/5742/5290/115/4881/3643/3667/3991/5592/11343/5733/113/5293/10000/2167/8660
hsa05212	Pancreatic cancer	76	-0.54581052615091	-1.59452231253813	0.000210184499220636	0.000602150186956416	0.000287022929234439	5318	tags=54%, list=26%, signal=40%	4089/10928/6198/5602/998/51426/5338/598/7046/4088/1871/208/4087/5291/5900/6772/7422/5594/675/2475/2064/5899/5290/1956/6774/7042/1026/7043/1021/3716/9459/7157/595/4790/4616/5293/10000/7048/5925/5880/7040
hsa05167	Kaposi sarcoma-associated herpesvirus infection	177	-0.546409072740485	-1.66755431585376	1.83383565428678e-08	1.23091653816488e-07	5.86732808658534e-08	4921	tags=51%, list=24%, signal=39%	55970/146850/5533/7316/5289/9261/5743/3717/4609/7297/3459/3105/3454/7098/1871/208/51806/5336/1385/6934/5291/1237/1432/6714/7186/2932/2247/3134/59345/5600/6772/2788/3725/2782/7422/5609/5594/3107/4775/7187/4067/2475/355/9641/1233/5290/6773/57580/1387/3091/2921/8678/5335/6774/4792/3106/3133/2033/3569/1026/1021/54331/5294/3572/3716/2920/23533/3576/148022/4773/7157/5530/4772/595/1230/4790/942/9976/123…
hsa04810	Regulation of actin cytoskeleton	199	-0.549138332397713	-1.68275832045921	4.78864625690005e-10	5.85688272959314e-09	2.79176138054092e-09	5149	tags=52%, list=25%, signal=39%	3696/998/5062/71/55970/5747/7430/8394/23191/2263/2846/6655/28964/200576/1729/10096/6654/5154/7074/89846/9475/60/7852/5291/3695/8516/6714/2247/85464/81624/8826/10458/6548/23365/5594/10672/8396/221178/23396/5305/9564/81/10788/4660/5290/1399/57121/22808/87/7409/3685/1793/1956/2768/8817/3672/324/8874/10163/5829/9138/2909/54434/56034/7414/4628/3673/3690/624/3694/4629/2934/4638/3676/9459/4478/80310/369…
hsa04350	TGF-beta signaling pathway	91	-0.549781313799017	-1.62741205537118	2.70829716603622e-05	9.78680112272181e-05	4.66500947259828e-05	5781	tags=55%, list=28%, signal=40%	79875/4052/4091/64750/9765/4089/353500/6198/64388/3458/654/7046/4609/60436/3399/57154/4088/4087/92/2331/4093/6667/90/285704/650/392255/5594/4756/10468/1387/659/3397/7042/2033/652/7043/8646/3625/4092/4086/26585/4681/1030/7048/7124/7040/7057/2200/1634/3624
hsa04072	Phospholipase D signaling pathway	133	-0.550068950882387	-1.65811630923842	3.6827279002081e-07	2.12928631321123e-06	1.01495276101429e-06	4414	tags=50%, list=21%, signal=39%	56848/2846/5338/6655/10555/112/6654/5154/5781/3815/2885/208/5336/5291/5900/2549/8527/8525/1606/5331/9846/8605/10161/5594/10672/25759/2475/7248/23396/5578/5899/56895/9267/5290/552/115/57121/22808/1956/2768/1759/3643/5335/6464/160851/9265/2185/5330/56034/5294/554/23533/3576/8877/2205/2207/113/80310/27128/1902/5155/5293/2149/10000/5156/5159
hsa05169	Epstein-Barr virus infection	184	-0.550256158356264	-1.67974101539773	1.55416409702772e-09	1.49764903895398e-08	7.13874417773497e-09	4404	tags=47%, list=21%, signal=37%	3516/7874/4615/4609/7297/25942/10454/3105/3454/1871/208/5336/5606/7189/953/6891/5291/1432/7186/3134/4940/5600/567/6772/3725/5609/3107/3123/7187/4939/4067/6890/23118/355/57506/956/919/9641/8737/317/5290/6773/917/4794/4734/958/3115/4791/3122/6774/4792/3106/864/3627/3133/695/3569/1026/6892/1021/3716/7431/3119/5971/8900/3111/960/7157/3127/915/595/4790/9612/3718/3113/4616/7097/5293/3117/10000/3683/916…
hsa04919	Thyroid hormone signaling pathway	115	-0.550351922691556	-1.65030282991555	3.77885127150053e-06	1.73230009378665e-05	8.25723977177349e-06	4389	tags=50%, list=21%, signal=40%	8648/4609/25942/1735/488/60/7068/208/5336/8850/9968/4855/9282/5291/6714/5579/2932/7067/5331/5170/6772/6548/5594/10499/2475/5578/9882/2099/9969/113026/5290/54361/8202/3685/1387/4853/3091/5335/9611/4854/2033/29079/23389/652/5330/489/10231/3690/5469/6256/7157/595/4851/5350/5293/10000/1734/2308
hsa01522	Endocrine resistance	93	-0.553570655239925	-1.64365311798106	2.17288105855812e-05	8.22590686454145e-05	3.92098837634548e-05	5171	tags=54%, list=25%, signal=40%	6198/5602/5747/638/5567/6655/112/2852/6654/1871/2885/208/4855/5291/1432/6714/5600/6667/3714/3725/5594/25759/2475/2099/2064/28514/5290/115/8202/4853/1956/1839/182/3479/9611/6464/3480/4854/1026/5469/7157/113/595/4851/5293/10000/2353/5925/4318/4313
hsa04612	Antigen processing and presentation	61	-0.554690200586951	-1.59133883946767	0.000362208465601809	0.00100158514835978	0.000477418938642201	7976	tags=84%, list=39%, signal=51%	3805/3821/3109/926/3306/5993/3305/3312/10437/3304/821/3824/3135/811/3108/1514/3303/2923/10197/3458/5641/3309/3105/1385/6891/3134/567/1508/4261/4800/3107/3123/6890/3310/972/5994/3115/3122/3106/3133/6892/3119/3111/925/3127/3113/920/3117/1520/7124/3118
hsa04935	Growth hormone synthesis, secretion and action	104	-0.55772196720595	-1.66641719553854	2.67357637425414e-06	1.26895117464599e-05	6.04862526147047e-06	5116	tags=56%, list=25%, signal=42%	5602/23236/8835/5747/5567/1386/6655/3717/112/6654/775/2885/2767/208/5336/1385/5606/5291/1432/5579/2932/5600/5331/6772/2771/4214/3483/5594/25759/2475/5578/9564/5290/115/1399/1388/1387/3479/3667/5335/6774/6464/64764/2033/6777/5330/6776/2690/113/3726/3486/3710/5293/10000/2353/9021/90993/8660
hsa05134	Legionellosis	56	-0.55847453884057	-1.5940598894237	0.000926203684378068	0.00226563670486328	0.00107994599635985	7749	tags=77%, list=38%, signal=48%	375/5970/3306/3592/10767/3305/3312/3304/29108/836/9554/1378/7415/840/3606/3303/841/58484/1917/57396/1195/4615/23786/834/3310/317/4791/2921/4792/7100/3569/2920/3553/3576/4790/7097/929/3684/7099/7124/3689/2919/718
hsa04666	Fc gamma R-mediated phagocytosis	91	-0.558976583105371	-1.65463104544224	9.98406304379007e-06	4.23324273056699e-05	2.0178316888502e-05	4414	tags=48%, list=21%, signal=38%	56848/2215/55616/5338/8398/10096/3636/10810/208/5336/5291/5579/9846/8605/5594/50807/4067/23396/5578/2209/5290/1399/7408/7409/1793/2213/5335/10163/653361/4082/8877/2934/7410/8853/7454/5293/3055/10000/2212/3985/2214/5788/5880/3635
hsa04625	C-type lectin receptor signaling pathway	98	-0.55922959516613	-1.66714204486637	3.29452824512396e-06	1.54067644404326e-05	7.34384005105031e-06	4486	tags=52%, list=22%, signal=41%	9261/5743/868/3659/5781/51561/208/51806/5336/5291/1432/6714/5600/6772/3725/10892/834/23365/1540/5594/4775/9641/5290/6773/6367/22808/8844/4791/4792/114548/3586/3569/64581/602/3553/5971/4773/2207/1960/26253/4046/1263/5530/4772/4790/30835/3710/1959/5293/10000/7124
hsa04330	Notch signaling pathway	58	-0.562536245210795	-1.60940457706472	0.000485259711250324	0.00129674443846725	0.000618110556568303	5392	tags=59%, list=26%, signal=43%	54567/23385/7088/22938/1855/3516/5663/26508/8850/4855/8650/9794/3714/6310/1840/9253/28514/4242/1387/4853/151636/182/3955/4854/1857/2033/6868/7090/84441/342371/55534/9612/4851/7091
hsa04151	PI3K-Akt signaling pathway	311	-0.563074963200809	-1.76094861359886	1e-10	1.44545454545455e-09	6.88995215311005e-10	4945	tags=48%, list=24%, signal=37%	7010/55970/146850/5747/894/4846/3563/7534/2263/5228/1386/5562/2846/6655/3717/598/4609/4233/3574/6654/3454/5154/29941/7533/3815/2885/208/1385/5526/1101/5291/3695/8516/2066/2932/2247/59345/2997/5170/57521/2788/356/2782/7422/10161/5594/2475/7248/5578/3911/2064/3913/5934/5290/1388/57121/284/7450/131873/3685/5008/1956/8817/3479/3672/3643/7148/3667/3480/54541/64764/118788/3569/1026/56034/4170/3915/3673…
hsa04068	FoxO signaling pathway	123	-0.563743775197081	-1.69492587090471	1.59610222826507e-07	9.39926867756096e-07	4.48028695653353e-07	5441	tags=54%, list=26%, signal=40%	5565/10733/4089/472/5602/847/894/604/5562/7874/6655/7046/6654/4088/51701/2885/208/5291/1454/116986/1432/5600/901/5170/356/26260/5594/4303/23710/8698/1901/5934/5290/6789/1387/1956/3479/3643/3667/6774/3480/7042/3586/2033/3569/1026/7043/6446/114907/8743/2309/1263/80854/595/10365/4616/6648/1030/5293/10000/10769/7048/7040/8660/3575/2308
hsa05414	Dilated cardiomyopathy	83	-0.564136208522915	-1.6589610041276	1.36557117981079e-05	5.42814543974788e-05	2.58739802490465e-05	5149	tags=54%, list=25%, signal=41%	3696/71/9254/27092/5567/6546/782/112/7168/488/775/60/7169/6445/3695/7134/8516/6443/1605/115/4000/7171/3685/3479/3672/781/7042/489/3673/7043/1674/3690/3694/6444/3676/113/3693/5350/3691/3675/3688/7124/7040/3678/22801
hsa04662	B cell receptor signaling pathway	78	-0.565708073858427	-1.65452152780553	2.41656619355452e-05	9.04080058294513e-05	4.30941835135419e-05	4289	tags=51%, list=21%, signal=41%	6655/6654/3636/974/79168/2885/208/5336/5291/5579/2932/11025/3725/10892/5594/4775/4067/5290/4794/7409/2213/4792/695/118788/4773/5530/10288/4772/4790/7410/10859/933/5293/10000/11006/2353/973/5880/3635/84433
hsa04657	IL-17 signaling pathway	83	-0.567239256842595	-1.66808616943077	1.01542832192409e-05	4.24876587331394e-05	2.02523100217546e-05	3479	tags=57%, list=17%, signal=47%	6279/6361/841/6364/5597/3458/5602/29761/6280/257397/5743/3934/7189/1432/5598/7186/2932/5600/3725/1051/5594/727897/7187/23118/9641/2921/4792/4312/3627/6372/3569/6374/2920/3553/23765/3576/8061/4790/6347/2353/7124/7128/2919/4322/2354/6356/4318
hsa04926	Relaxin signaling pathway	121	-0.567911227161674	-1.70498309446159	1.4904016939207e-07	8.94241016352421e-07	4.26251924378512e-07	4289	tags=50%, list=21%, signal=39%	5602/23236/55970/5567/4846/1386/6655/7046/112/6654/2885/208/4087/1385/5291/1432/6714/59345/5600/5331/2788/3725/2771/2782/7422/5609/5594/408/25759/5578/1906/5290/115/1388/1956/4792/6464/4312/64764/5330/54331/113/4790/7424/2769/5293/1284/10000/1282/2353/7048/7040/59/90993/4322/1278/4318/4313/1281/1277
hsa04650	Natural killer cell mediated cytotoxicity	101	-0.568269577239567	-1.69271725307032	1.4503666246218e-06	7.68694311049551e-06	3.66408410430769e-06	4406	tags=49%, list=21%, signal=38%	2215/6655/8797/6654/3459/3105/3454/5781/2885/5336/5291/5579/356/7305/5594/3107/3932/25759/5578/355/7535/919/5290/7409/4068/8795/5335/3106/6464/3133/2185/6452/3002/8743/4773/2207/962/5530/4772/5551/7410/3937/5293/3683/2214/5880/7124/3689/3383
hsa05221	Acute myeloid leukemia	66	-0.569174085531636	-1.64327619349064	9.82155199864603e-05	0.000312325353556944	0.000148874051347898	4488	tags=53%, list=22%, signal=42%	11040/6655/4609/6654/7704/3815/2885/208/6934/5291/5594/5371/862/2475/3728/2209/5290/5292/5467/597/6774/6777/6776/8864/861/8900/1848/595/4790/6688/5293/929/3684/10000/1436
hsa05163	Human cytomegalovirus infection	203	-0.569477669223736	-1.74816378605818	1e-10	1.44545454545455e-09	6.88995215311005e-10	3747	tags=47%, list=18%, signal=39%	1871/9475/2885/2767/208/51806/1385/9826/7852/6891/5291/1432/6714/7186/5579/2932/3134/59345/5600/567/414062/6667/5331/2788/2771/356/2782/23365/7422/5594/3107/4775/10672/2475/7248/5578/6890/355/9564/8737/5290/115/5732/1399/1388/6376/3685/6348/1956/2768/6774/4792/3106/3133/5829/9138/64764/3569/1026/2185/5330/6892/1021/54331/3690/5734/3716/11214/3553/3576/4773/5733/7157/113/5530/4772/595/1230/4790/35…
hsa05410	Hypertrophic cardiomyopathy	79	-0.569696479250017	-1.66657120784986	1.94000867692005e-05	7.43280432844067e-05	3.54294545943547e-05	5444	tags=57%, list=27%, signal=42%	3908/5565/3696/71/9254/27092/6546/5562/782/7168/488/775/60/7169/6445/3695/7134/8516/6443/1605/1906/4000/7171/3685/3479/3672/781/7042/3569/489/3673/7043/1674/3690/3694/6444/3676/3693/3691/3675/3688/7124/7040/3678/22801
hsa05202	Transcriptional misregulation in cancer	156	-0.570802230928636	-1.734317643303	1.04304094871855e-09	1.14374835066379e-08	5.45182927823851e-09	5461	tags=57%, list=27%, signal=42%	6929/7403/4298/472/1655/4149/9915/2120/5747/894/604/51426/55589/2078/2130/221037/598/4609/25942/7709/4233/5087/7704/4066/5154/2005/4286/3695/7030/5966/4297/7185/51804/6667/1051/2118/5090/5371/862/51274/64919/8148/3728/2209/84444/958/597/3479/4208/9611/3480/64332/860/3087/3569/1026/7849/330/8013/4086/2321/4299/3002/8864/861/2313/3576/6256/2119/8900/7157/5218/1848/4790/942/4094/6688/4616/6935/3486/…
hsa05152	Tuberculosis	159	-0.571257706919265	-1.73620508954887	1.96836242684679e-09	1.84099779922729e-08	8.7753619029702e-09	3733	tags=47%, list=18%, signal=38%	51561/208/51806/7879/1385/7189/817/1432/6714/5600/843/4261/6772/10892/4800/1051/23365/11151/5594/3123/972/2209/5994/317/535/22925/8844/7096/1387/3115/3916/2213/3122/7042/3586/2033/3656/3569/64581/7043/9103/3716/3553/3119/8877/2207/26253/4046/1263/3111/5530/3127/4790/30835/4360/3113/3687/7421/7097/929/3684/7099/3117/1520/10000/3587/2212/9902/2214/7124/7040/3118/3689/718
hsa04936	Alcoholic liver disease	120	-0.572518546219128	-1.71838588309174	1.01501043920021e-07	6.45546639331335e-07	3.07708427883854e-07	5490	tags=55%, list=27%, signal=41%	841/1499/5565/32/9663/5602/9020/51/257397/219/5562/217/4615/31/10454/208/6934/5606/7189/1432/2932/5600/356/5609/7187/23175/23118/355/64900/2194/9641/8737/79966/721/717/2921/4792/23643/4217/5465/3569/50507/6720/2920/3553/23765/3576/148022/2309/6319/712/595/4790/720/714/929/7099/713/10000/125/728/719/7124/2919/718/2308
hsa04611	Platelet activation	111	-0.573660016315663	-1.71993287963633	1.1932453400853e-07	7.41146625460207e-07	3.53277438153822e-07	5109	tags=55%, list=25%, signal=42%	23236/71/9002/146850/5567/4846/64805/10125/5023/8773/112/2977/9475/60/208/5336/6915/5291/1432/6714/5600/5331/2771/23365/8605/5594/10672/4067/5742/5290/6916/115/7408/7450/5592/695/9138/2909/5330/5739/7094/3673/5294/3690/23533/2207/4638/113/5584/83706/3937/3688/3710/54518/5293/2149/10000/2212/1278/1281/1277
hsa04145	Phagosome	142	-0.57386961731124	-1.739365624951	4.92106406641597e-09	4.11815361347442e-08	1.96297292399972e-08	5055	tags=56%, list=25%, signal=42%	84617/71/5878/7037/245972/5289/29927/2215/528/200576/523/2204/1778/3105/60/7879/6891/23673/1781/3134/8417/11151/3107/3123/9341/6890/338382/2209/526/535/22925/7277/3685/3115/3916/4481/2213/3122/3106/3133/948/4689/64581/3673/9103/3690/653361/1783/3119/3111/3127/30835/3693/4360/4688/3113/10382/8685/7097/3688/4973/929/3684/7099/715/3117/1520/2212/9902/2214/81035/3118/3678/3689/7057/1536/718/1311/7058
hsa05215	Prostate cancer	93	-0.576641154058188	-1.71215367334301	1.88202703097322e-06	9.49975548967435e-06	4.52818533767993e-06	4323	tags=44%, list=21%, signal=35%	2078/6655/6654/5154/1871/2885/208/1385/6934/5291/2932/5170/5594/2475/2064/5290/1387/1956/3479/4792/3480/64764/2033/1026/56034/2119/7157/595/80310/4790/5155/6935/5293/10000/5156/5925/90993/5159/5328/4318/2308
hsa04660	T cell receptor signaling pathway	97	-0.57745065520174	-1.71991251109625	2.57008455998419e-06	1.2688263273829e-05	6.04803016031569e-06	5155	tags=59%, list=25%, signal=44%	3458/5602/9020/998/5062/5533/1739/10125/868/6655/1326/940/6654/8440/2885/208/5291/1432/2932/5600/5170/1493/3725/10892/5609/5594/959/4775/3932/3702/7535/919/5290/917/29851/4794/5133/7409/5335/4792/3586/4773/5530/925/915/4772/4790/7410/3937/5293/920/10000/2353/5788/916/7124/84433
hsa05220	Chronic myeloid leukemia	76	-0.578848643810553	-1.69103935141619	1.414711814787e-05	5.554053791386e-05	2.64741392240842e-05	4289	tags=50%, list=21%, signal=40%	6655/598/7046/4609/6654/5781/4088/867/1871/2885/208/5291/2122/9846/5594/25759/5290/1399/613/4792/6464/7042/6777/1026/6776/7043/1021/861/25/7157/595/4790/4616/5293/10000/7048/5925/7040
hsa05161	Hepatitis B	148	-0.58066807717768	-1.76245113960087	1.48891368546817e-09	1.479607974934e-08	7.05274903642819e-09	4289	tags=53%, list=21%, signal=42%	6655/3717/4615/7046/4609/7297/64135/10454/6654/6778/3454/7098/4088/1871/2885/208/1385/1654/5606/7189/5291/1432/6714/5579/5600/843/6772/3725/356/4214/5609/5594/4775/7187/5578/23118/355/57506/9641/317/5290/6773/1388/1387/6774/4792/7042/64764/2033/6777/3569/1026/2185/6776/7043/3716/3576/148022/4773/1960/8900/7157/4772/4790/3718/7097/1959/5293/7099/10000/2353/7048/5925/7124/7040/90993/3339/4318
hsa05164	Influenza A	148	-0.58162143980893	-1.7653447979953	1.23412899610489e-09	1.30817673587118e-08	6.23559913821417e-09	4286	tags=51%, list=21%, signal=40%	3717/4615/7297/8797/64135/3459/10482/3454/7098/9230/4928/60/208/5291/10241/103/91543/5579/4940/7706/4261/6772/356/834/6041/11100/5594/3123/7187/5371/4939/5578/355/57506/9641/317/90865/5290/6773/56649/1387/3115/8795/3122/4792/3627/114548/2033/3569/23430/1021/3716/3553/51284/8743/3576/148022/3119/3111/3127/5611/4790/6347/3113/5293/7099/3117/10000/64499/9021/7177/6352/7124/3118/3383
hsa04340	Hedgehog signaling pathway	47	-0.581695729741743	-1.62535194364218	0.00108562005798835	0.00261535741242649	0.00124664504266605	6133	tags=68%, list=30%, signal=48%	8405/57758/64750/91653/894/5567/23295/339745/1456/8452/1453/57154/23291/8945/1455/53944/50937/1454/5727/23288/2932/84976/2736/408/51684/1452/132884/2737/1954/595/2121/2619
hsa04917	Prolactin signaling pathway	63	-0.58190746244022	-1.67533466836276	6.02470543588708e-05	0.000197510961712587	9.41462379563473e-05	5116	tags=57%, list=25%, signal=43%	5602/9655/8600/1154/8835/894/9306/6655/3717/3659/6654/2885/208/5291/1432/8792/6714/2932/5600/6772/30837/5594/25759/2099/5290/6774/6464/6777/6776/2309/595/4790/5293/10000/2353/9021
hsa05235	PD-L1 expression and PD-1 checkpoint pathway in cancer	88	-0.582651253485588	-1.71905360888756	1.57842191597107e-06	8.09577692385163e-06	3.85896020203454e-06	5171	tags=59%, list=25%, signal=44%	6198/283106/3458/5533/29126/10125/116071/3717/4615/940/3459/5781/208/5606/7189/5291/1432/238/5600/6772/3725/1457/5594/4775/3932/2475/7535/919/5290/4215/917/4794/5133/3091/1956/5335/6774/4792/3716/148022/4773/5530/915/4772/4790/7097/5293/7099/920/10000/2353/916
hsa01521	EGFR tyrosine kinase inhibitor resistance	78	-0.585159090081057	-1.71140974730457	3.81323920015928e-06	1.73230009378665e-05	8.25723977177349e-06	4289	tags=55%, list=21%, signal=44%	6655/3717/598/4233/6654/5154/2885/208/5336/5291/2549/6714/5579/2932/2247/7422/5594/25759/2475/5578/2064/5290/4763/1956/3479/5335/6774/6464/3480/3569/56034/3716/3791/2309/80310/3570/5155/5293/2621/10000/558/5156/5159
hsa05412	Arrhythmogenic right ventricular cardiomyopathy	69	-0.588762392891795	-1.7083142667433	2.6197092413487e-05	9.57548895113663e-05	4.56428470362024e-05	5456	tags=55%, list=27%, signal=41%	1499/3908/3696/71/9254/27092/1495/6546/782/488/775/60/6934/6445/3695/8516/6443/1605/3728/4000/3685/3672/781/1832/489/3673/1674/3690/3694/6444/3676/3693/3691/3675/2697/3688/3678/22801
hsa05143	African trypanosomiasis	33	-0.591834501390716	-1.58533910655052	0.00449804199645546	0.00973045819641386	0.00463815286422905	5170	tags=61%, list=25%, signal=45%	6401/3458/23236/4615/3043/2150/5579/5331/356/5578/355/3586/3569/5330/3553/3910/8542/7124/7412/3383
hsa05135	Yersinia infection	133	-0.592221685494622	-1.78518062840682	6.64226576091539e-10	7.82311300730034e-09	3.72899130437355e-09	3720	tags=51%, list=18%, signal=42%	9475/147179/60/208/5606/7189/5291/1432/6714/7186/2932/5600/10458/3725/834/9844/23365/5609/5594/6197/4775/3932/23396/23118/7535/9564/6195/9815/5290/1399/7409/8935/1793/5335/4792/8874/10163/5829/114548/3586/9138/3569/2185/3553/3576/148022/4773/3676/925/4772/4790/6196/6347/7410/7456/3937/3688/7454/5293/7099/920/10000/2212/2353/5880/7124/3678/2335
hsa04392	Hippo signaling pathway - multiple species	28	-0.597559067664849	-1.56778617427403	0.00924004237108913	0.0190800874935477	0.00909477854707337	5023	tags=61%, list=24%, signal=46%	84962/92597/79633/23286/7005/60485/25937/1454/126374/9113/4771/83937/9770/122786/8642/7003/26524
hsa04062	Chemokine signaling pathway	179	-0.598257901477452	-1.82697888288367	1e-10	1.44545454545455e-09	6.88995215311005e-10	3720	tags=50%, list=18%, signal=41%	9475/2885/208/5336/7852/5291/1237/6714/5579/6355/2932/59345/2869/414062/5331/6772/2788/2771/2782/9844/5594/408/3702/4067/25759/56288/9564/1233/5290/115/6773/6373/6367/1399/6376/57580/7409/58191/6348/2921/5335/6774/4792/1236/6464/3627/5829/6372/6777/2185/5330/1524/54331/5294/729230/653361/10663/6374/2920/23533/3576/2309/2268/113/1794/2833/1230/4790/6347/7410/3718/388372/6363/1234/6351/7454/5293/30…
hsa04664	Fc epsilon RI signaling pathway	60	-0.598902643123614	-1.71883636770075	1.5879275768893e-05	6.15806060305851e-05	2.9353218366118e-05	4289	tags=52%, list=21%, signal=41%	6655/6654/2885/208/5336/5606/5291/1432/5600/5170/9846/8605/5609/5594/4067/5578/5290/7409/5335/695/2205/2207/7410/3937/5293/240/10000/241/5880/7124/3635
hsa05145	Toxoplasmosis	107	-0.599019744082099	-1.79094568546409	1.3019704559129e-08	9.20059122178446e-08	4.38558469360133e-08	4286	tags=55%, list=21%, signal=44%	3717/4615/598/7297/10454/331/3459/208/5606/7189/1432/5600/4261/5170/6772/2771/5594/959/3123/23118/3310/3911/3913/958/3115/3122/6774/4792/23643/7042/3586/3915/7043/5294/330/3716/23533/3119/3910/3111/3918/3127/3914/4790/3909/3113/1234/3912/7097/3688/7099/240/3117/10000/3587/3949/7124/7040/3118
hsa04060	Cytokine-cytokine receptor interaction	236	-0.601637131352295	-1.86098957700433	1e-10	1.44545454545455e-09	6.88995215311005e-10	3772	tags=47%, list=18%, signal=39%	608/51561/146433/1489/92/7852/8809/1237/8742/8792/6355/414062/90/3594/8794/356/943/3601/3590/650/392255/959/355/3597/23529/1233/90865/6373/6367/6376/58191/5008/8764/6348/958/659/8740/2921/8795/1236/3627/7042/3586/6372/3569/3557/652/939/3556/1524/60401/7043/8793/3625/729230/51554/10663/3572/6374/2920/2690/3603/3553/3604/8743/23765/1438/3576/1435/50615/1441/94/3559/2833/1230/3570/6347/388372/10148/…
hsa04670	Leukocyte transendothelial migration	103	-0.607880589010607	-1.8146823645967	1.09469344937281e-08	7.91164811137619e-08	3.77119274425081e-08	3990	tags=53%, list=19%, signal=43%	90952/100506658/399/5781/9475/60/5336/7852/5291/1432/5579/5600/2771/9074/3702/5578/9564/81/5290/5010/7408/87/7409/1500/5335/7070/5829/2909/1003/2185/83700/4689/7414/653361/83593/3676/4478/4688/58494/7410/5175/3688/5293/3684/3683/9076/5880/10686/3689/1536/7412/3383/4318/6387/4313
hsa04510	Focal adhesion	192	-0.611065447016518	-1.86735296613554	1e-10	1.44545454545455e-09	6.88995215311005e-10	4161	tags=54%, list=20%, signal=43%	1729/4233/6654/331/5154/3611/9475/2885/60/208/1101/5291/3695/8516/6714/5579/2932/2317/5170/3725/64098/7422/5594/824/858/25759/23396/55742/5578/3911/2064/9564/3913/81/4660/5290/1399/7408/7450/87/7409/131873/3685/1793/1956/3479/3672/7148/6464/3480/5829/2909/56034/7094/3915/7414/3673/3381/3690/2889/330/3694/2321/6696/3791/3910/4638/3676/2316/3918/3914/595/80310/857/3693/3909/7410/7424/3912/3691/5155…
hsa04630	JAK-STAT signaling pathway	130	-0.613427069867291	-1.84695067647647	1e-10	1.44545454545455e-09	6.88995215311005e-10	5537	tags=62%, list=27%, signal=46%	7066/9466/3589/316/6775/8027/10254/3458/9655/1154/8835/894/3563/9306/11009/6655/3717/598/4609/7297/3574/6654/6778/3459/3454/5154/5781/51561/2885/1489/208/5291/6772/3594/8554/3601/3590/2670/30837/2475/2273/3597/5290/5292/6773/5008/1387/10401/1956/6774/3586/2033/6777/3569/1026/4170/6776/3572/3716/2690/1438/50615/1441/3559/595/3570/3718/5155/5293/3566/10000/3587/9021/9180/5156/1439/3561/3976/3560/51…
hsa05142	Chagas disease	98	-0.613427235331167	-1.82871282980458	6.93095979936089e-09	5.51011304049191e-08	2.62646897659992e-08	3641	tags=49%, list=18%, signal=40%	2767/208/4087/7189/5291/1432/5600/414062/5331/3725/2771/356/5594/8837/355/919/5290/917/6348/4792/7042/3586/3569/5330/7043/624/3553/3576/148022/712/915/4790/6347/2769/7097/714/5293/7099/713/10000/2353/7048/916/6352/7124/7040/718/5054
hsa04520	Adherens junction	65	-0.619470224287405	-1.78680513073469	2.61195966483118e-06	1.2688263273829e-05	6.04803016031569e-06	5456	tags=69%, list=27%, signal=51%	1499/4089/283106/998/71/999/5797/1495/7046/4233/10810/4088/51701/5792/60/6615/6934/5787/6714/7082/10580/8826/2241/10458/1457/5594/56288/2064/81/87/1387/1956/5770/3643/1500/3480/10163/2033/7414/5795/4008/7454/7048/5880/6591
hsa04380	Osteoclast differentiation	124	-0.619980558839257	-1.86544998550285	1e-10	1.44545454545455e-09	6.88995215311005e-10	4244	tags=65%, list=21%, signal=52%	3458/5602/9020/8600/29760/5533/11024/2215/7046/7297/10454/3459/3454/79168/2885/208/5336/1385/4286/7189/5291/1432/8792/7186/11025/5600/6772/3725/7305/9846/1540/5609/5594/3932/23118/2209/5290/54/6773/55423/4791/2213/4792/7042/695/126014/4689/9103/3690/653361/3716/3553/1435/5971/4773/5530/8061/10288/4772/4790/4688/6688/10859/3726/2355/3554/3937/5293/10000/11006/2212/2353/2214/7048/9021/140885/7124/7…
hsa04613	Neutrophil extracellular trap formation	102	-0.62155117098193	-1.85261325029713	1.45998554236593e-09	1.479607974934e-08	7.05274903642819e-09	3663	tags=48%, list=18%, signal=40%	60/208/5336/5291/9759/1432/6714/5579/5600/5331/834/1182/3146/5594/2475/5578/10014/2209/5290/7450/5335/6403/366/5330/4689/64581/3690/653361/27180/51284/51311/4790/4688/2357/7097/5293/3684/7099/10000/3683/2212/728/2214/6404/5880/2359/3689/1536/718
hsa04620	Toll-like receptor signaling pathway	88	-0.624174928441433	-1.84156501319691	9.04905274516276e-09	6.85142564990894e-08	3.26582354712641e-08	4283	tags=58%, list=21%, signal=46%	4615/1326/10454/3454/7098/3663/208/5606/7189/5291/1432/5600/414062/6772/3725/5609/5594/7187/23118/9641/8737/5290/6373/7096/6348/958/4792/7100/23643/3627/3569/6696/3553/51284/51311/3576/148022/4790/942/388372/7097/6351/5293/929/7099/10000/2353/6352/7124/4283/1513
hsa05205	Proteoglycans in cancer	191	-0.626307790817286	-1.91275934514941	1e-10	1.44545454545455e-09	6.88995215311005e-10	3822	tags=52%, list=19%, signal=43%	5781/867/9475/2885/60/208/4087/5336/817/5291/5727/1432/2549/2066/6714/5579/2247/5600/2317/8826/7481/5170/356/6548/23365/7472/7422/5594/858/2475/5578/355/2099/2064/2817/4660/5290/54361/22808/7409/3685/3091/1956/1839/8325/3479/5335/6774/3480/5829/7042/9138/6382/7474/1026/7483/7855/10855/3673/3690/3791/80326/2316/960/7157/4478/595/857/3693/406903/7410/3059/7097/3688/5329/3710/5293/7099/8321/2318/100…
hsa05219	Bladder cancer	41	-0.626732548529848	-1.71687934228482	0.000382126783062156	0.00104755445701522	0.000499330823602091	3184	tags=44%, list=16%, signal=37%	6714/1613/7422/5594/1612/2064/1956/1839/4312/1026/1890/3576/7157/595/5925/7057/4318/4313
hsa04668	TNF signaling pathway	109	-0.628227777121367	-1.88215185495191	2.03219675372604e-10	2.692660698687e-09	1.28349268656381e-09	3618	tags=54%, list=18%, signal=45%	208/1385/5606/8809/5291/1432/7186/7185/5600/843/3725/1051/5609/5594/8837/7187/23118/355/1906/8737/5290/1388/197259/6376/182/2921/4792/11035/4217/3627/64764/6372/3569/153090/330/602/6374/2920/3553/1435/4790/6347/7424/3726/5293/10000/2353/9021/6352/7133/7124/90993/7128/3976/2919/4323/7412/3383/4318
hsa04940	Type I diabetes mellitus	37	-0.636138009120605	-1.72886610100954	0.000130889605639143	0.000392668816917429	0.0001871708362665	5155	tags=73%, list=25%, signal=55%	3458/4049/1363/941/940/3382/3105/3134/356/3107/3123/355/3115/3122/3106/3133/3002/3553/3119/3111/3127/942/5551/3113/3117/7124/3118
hsa04710	Circadian rhythm	29	-0.63675016460933	-1.68279226264241	0.00150280986958405	0.00353995213724244	0.00168736546760315	4615	tags=66%, list=22%, signal=51%	6095/5562/1453/23291/8945/9575/1385/1454/79365/1408/6097/406/9572/26224/8864/8553/5187/8863/4862
hsa04064	NF-kappa B signaling pathway	102	-0.637099877788726	-1.89895817184196	1.48377295041051e-10	2.05147738361105e-09	9.77864095465051e-10	5259	tags=67%, list=26%, signal=50%	472/283106/23085/9020/4049/8600/29760/257397/6357/5743/4615/598/10454/331/5336/7189/8792/7186/5579/7185/7706/10892/1457/1540/959/8837/7187/3932/4067/23118/7535/29775/8737/958/4791/8740/2921/597/5335/4792/23643/695/60401/330/2920/3553/3576/148022/5971/4790/388372/4616/10673/6363/6351/3554/929/7099/4050/7124/7128/6366/2919/7412/84433/3383/5328/6387
hsa04514	Cell adhesion molecules	132	-0.639671578636896	-1.92687163039639	1e-10	1.44545454545455e-09	6.88995215311005e-10	4696	tags=63%, list=23%, signal=49%	999/29126/5797/941/257194/83692/940/4685/90952/3105/100506658/5792/947/3695/8516/3385/3134/57689/1493/9074/3107/959/3123/201633/4756/4897/94030/57502/5010/29851/214/57555/80381/5133/22854/3685/958/3115/3122/5817/3106/2734/3133/6403/6382/1003/83700/9672/6693/4099/8506/923/6402/3119/3676/3111/925/3127/80380/942/58494/3113/5175/3897/933/3688/6614/3684/920/3117/3683/1272/6404/5788/9076/10686/3118/914…
hsa05416	Viral myocarditis	55	-0.64689761715332	-1.84608840560532	2.63341313230413e-06	1.2688263273829e-05	6.04803016031569e-06	4659	tags=67%, list=23%, signal=52%	1982/941/940/3105/60/6445/3134/6443/27/3107/959/1605/3123/958/3115/3122/3106/3133/8672/1981/1604/6444/3119/25/3111/3127/595/942/857/5551/3113/3117/3683/5880/3118/3689/3383
hsa05323	Rheumatoid arthritis	85	-0.652480094846006	-1.92105209330871	8.91827878140228e-10	1.01286166160212e-08	4.82794039293958e-09	3195	tags=55%, list=16%, signal=47%	8792/414062/1493/3725/7422/3123/54/526/535/284/6348/3115/2921/3122/4312/7042/6372/3569/7043/6374/2321/2920/3553/3576/1435/3119/3111/3127/942/6347/3113/10673/7097/7099/3117/3683/2353/4050/6352/7124/7040/3118/3689/2919/3383/6387/1513
hsa04933	AGE-RAGE signaling pathway in diabetic complications	99	-0.652754188446564	-1.94579261066344	1e-10	1.44545454545455e-09	6.88995215311005e-10	3618	tags=54%, list=18%, signal=44%	208/4087/5336/5291/1432/5579/5600/5331/6772/3725/7422/5594/5578/1906/113026/5290/5292/5335/6774/7042/6777/3569/5330/6776/7043/2152/50507/3553/3576/4772/595/4790/6347/7424/7056/5293/1284/10000/1282/7048/7124/7040/1958/1536/7412/3383/1278/4313/5054/1281/2335/1277/2308
hsa04672	Intestinal immune network for IgA production	39	-0.655857533863437	-1.78690781989432	6.24690215902307e-05	0.00020270560067034	9.66223319977789e-05	3772	tags=64%, list=18%, signal=52%	941/940/608/7852/3695/3601/959/3123/29851/958/3115/3122/3586/3569/3119/3676/3111/3127/942/3113/10673/3117/7040/3118/6387
hsa00532	Glycosaminoglycan biosynthesis - chondroitin sulfate / dermatan sulfate	20	-0.662054527433648	-1.63202170543615	0.002489949169872	0.00573770895666157	0.00273495560992806	3784	tags=70%, list=18%, signal=57%	64132/10090/55501/55790/54480/22856/64131/9469/55454/79586/29940/337876/50515/51363
hsa04658	Th1 and Th2 cell differentiation	84	-0.663236333234447	-1.95082269247685	1e-10	1.44545454545455e-09	6.88995215311005e-10	3290	tags=61%, list=16%, signal=51%	1432/9794/5600/3714/6772/3725/3594/5594/4775/3123/3932/7535/919/28514/917/4794/4853/3115/182/3122/5335/4792/864/4854/6777/6776/3716/2625/3119/4773/84441/3111/5530/3127/915/4772/3559/55534/4790/4851/4094/3718/3113/920/3566/3117/2353/916/3118/3561/3560
hsa05133	Pertussis	72	-0.670917677281608	-1.95210750628665	2.12184540990164e-09	1.92784811528206e-08	9.1893455346116e-09	3733	tags=54%, list=18%, signal=44%	51561/51806/7189/1432/5600/10392/3725/2771/834/5594/721/717/23643/114548/3586/6372/3569/710/6374/3553/3576/148022/712/3394/4790/720/3688/714/929/3684/7099/715/713/2353/7124/3678/3689/718/716
hsa04659	Th17 cell differentiation	98	-0.67279189744032	-2.005687233586	1e-10	1.44545454545455e-09	6.88995215311005e-10	4286	tags=69%, list=21%, signal=55%	3717/7046/7297/30009/6778/3459/4088/51561/4087/1432/5600/196/6772/3725/3594/5594/4775/3123/3932/2475/7535/919/917/4794/3091/3115/3122/5335/6774/4792/6097/50943/6777/3569/3556/6776/3572/3716/861/3662/3553/2625/3119/4773/6256/50615/3111/5530/3127/915/4772/3559/4790/3570/3718/3113/10148/3554/920/3566/3117/2353/7048/916/7040/3118/3561/3560
hsa05146	Amoebiasis	90	-0.675172150413522	-1.99387162138096	1e-10	1.44545454545455e-09	6.88995215311005e-10	2458	tags=50%, list=12%, signal=44%	5578/338382/3911/3913/81/5290/87/2921/911/913/7042/3586/3569/5330/3915/7414/7043/2920/3553/3576/3910/5272/3918/909/3914/4790/3909/2769/3912/7097/3554/5293/929/3684/7099/1284/1282/7124/7040/3689/2919/1278/1281/2335/1277
hsa04974	Protein digestion and absorption	84	-0.685193057147462	-2.01540551629935	1e-10	1.44545454545455e-09	6.88995215311005e-10	2594	tags=38%, list=13%, signal=33%	80781/206358/91522/4311/169044/131873/85301/9056/1803/1294/1306/3783/1359/1305/1284/1282/1296/50509/2006/1303/1307/1291/1292/1278/1293/1290/1295/1281/1301/1277/1289/1300
hsa05140	Leishmaniasis	72	-0.687517062318109	-2.00040521139525	2.17451716290163e-10	2.76598583121087e-09	1.31844409034878e-09	4471	tags=67%, list=22%, signal=52%	5743/2215/3717/4615/10454/3459/7189/1432/5579/5600/6772/3725/5594/3123/23118/2209/3115/3122/4792/7042/3586/4689/7043/9103/653361/3716/3553/3119/3676/3111/3127/4790/4688/3113/7097/3688/3684/7099/3117/2212/2353/2214/7124/7040/3118/3689/1536/718
hsa05332	Graft-versus-host disease	32	-0.689724029612696	-1.84230390309309	5.75068308335915e-05	0.000192442463989389	9.17302708191727e-05	3100	tags=66%, list=15%, signal=56%	3134/356/3107/3123/355/3115/3122/3106/3133/3569/3002/3553/3119/3111/3127/942/5551/3113/3117/7124/3118
hsa04640	Hematopoietic cell lineage	85	-0.692593576738295	-2.03915544844212	1e-10	1.44545454545455e-09	6.88995215311005e-10	2062	tags=54%, list=10%, signal=49%	2209/917/4311/3115/3672/911/3122/913/948/3569/3673/3690/1604/3553/1438/924/1435/3119/1441/3676/921/3111/960/925/3127/909/915/3559/3570/3113/951/3554/3675/933/929/3684/920/3566/3117/916/7124/3118/914/3678/1436/3575
hsa05321	Inflammatory bowel disease	53	-0.698121812490499	-1.98143230808116	9.50080836821988e-09	7.02617921184633e-08	3.34912216652059e-08	4149	tags=74%, list=20%, signal=59%	30009/6778/3459/4088/51561/4087/8809/6772/3725/3594/3123/3115/3122/6774/7100/6097/7042/3586/50943/3569/7043/3553/2625/3119/50615/3111/3127/4772/4790/4094/3113/7097/7099/3566/3117/7124/7040/3118/3561
hsa05340	Primary immunodeficiency	32	-0.700572061930765	-1.87127979986108	2.56161196722981e-05	9.47200704161722e-05	4.51495866929123e-05	3436	tags=59%, list=17%, signal=50%	6891/4261/959/3932/6890/7535/5994/29851/958/695/925/915/3718/920/973/5788/916/3561/3575
hsa05330	Allograft rejection	31	-0.706104518613124	-1.87827065269556	1.34759994349372e-05	5.42451622824056e-05	2.58566811276611e-05	3100	tags=71%, list=15%, signal=60%	3134/356/3107/959/3123/355/958/3115/3122/3106/3133/3586/3002/3119/3111/3127/942/5551/3113/3117/7124/3118
hsa04061	Viral protein interaction with cytokine and cytokine receptor	90	-0.713643516510059	-2.10748259459522	1e-10	1.44545454545455e-09	6.88995215311005e-10	2187	tags=54%, list=11%, signal=49%	1233/6373/6367/6376/8764/6348/8740/2921/8795/1236/3627/3586/6372/3569/1524/8793/729230/51554/3572/6374/2920/8743/3576/1435/3559/2833/1230/3570/6347/388372/6363/1234/6351/3587/57007/6352/7133/7124/6362/3561/3560/6366/2919/10563/1436/6356/6387/4283/9547
hsa05320	Autoimmune thyroid disease	32	-0.715004038716915	-1.90982867741346	7.97508887948642e-06	3.42713278875227e-05	1.63358861827318e-05	3100	tags=78%, list=15%, signal=66%	941/940/3105/3134/1493/356/3107/959/3123/355/958/3115/3122/3106/3133/3586/3002/3119/3111/3127/942/5551/3113/3117/3118
hsa04610	Complement and coagulation cascades	68	-0.715627758417465	-2.07362040608129	1e-10	1.44545454545455e-09	6.88995215311005e-10	1960	tags=46%, list=10%, signal=41%	7450/721/7035/5055/717/710/2152/624/1604/5265/712/5627/720/3687/7056/5329/714/3684/3075/715/713/2149/728/719/11326/3689/718/2162/5328/716/5054
hsa05322	Systemic lupus erythematosus	46	-0.716714949741224	-1.99533481470759	1.53257504573108e-08	1.05947579248366e-07	5.05013287380492e-08	2613	tags=61%, list=13%, signal=53%	959/3123/2209/81/87/721/958/3115/717/3122/3586/3119/3111/712/3127/942/3113/720/714/715/713/3117/2212/2214/7124/3118/718/716
hsa05144	Malaria	46	-0.721939324088178	-2.00987947576608	8.83982822591515e-09	6.85142564990894e-08	3.26582354712641e-08	1796	tags=54%, list=9%, signal=50%	958/7042/3586/948/6403/6382/3569/7043/3553/3576/6347/5175/7097/7099/3683/2532/7124/7040/4035/3689/7057/7412/3383/1311/7058
hsa04512	ECM-receptor interaction	80	-0.725054829574119	-2.12341868778419	1e-10	1.44545454545455e-09	6.88995215311005e-10	2316	tags=52%, list=11%, signal=47%	3911/3913/7450/131873/3685/3672/7148/948/6382/3915/3673/3381/3690/3694/6696/375790/3910/3676/960/3918/3914/3693/3909/3912/3691/3675/3688/1284/1282/3678/7057/3339/3371/1291/1292/1278/22801/1293/2335/1277/1311/7058
hsa05150	Staphylococcus aureus infection	61	-0.747834873681713	-2.14544745650605	1e-10	1.44545454545455e-09	6.88995215311005e-10	2595	tags=64%, list=13%, signal=56%	3123/1675/2209/721/3861/3115/717/2213/3122/3586/6403/9103/3119/3111/712/3127/3113/720/2357/714/3684/3075/715/713/3117/3683/2212/728/2214/719/6404/5724/3118/2359/3689/718/3872/3383/716
hsa05310	Asthma	21	-0.813926098871177	-2.01626277149933	3.98288488463255e-07	2.26170963091634e-06	1.07807410411107e-06	2613	tags=76%, list=13%, signal=67%	959/3123/958/3115/3122/3586/3119/2205/2207/3111/3127/3113/3117/7124/3118/6356
