# Supplementary material for: Identifying the Role of Oxidative Stress-Related Genes as Prognostic Biomarkers and Predicting the Response of Immunotherapy and Chemotherapy in Ovarian Cancer
Source: Oxid Med Cell Longev. 2022 Dec 12;2022:6575534. doi: 10.1155/2022/6575534 (PMC9764017; doi:10.1155/2022/6575534)
Supplement: Supplementary 8 — Supplement Table 7: signaling pathway analysis in regard to GPR37. [file 6575534.f8.txt]

ID	Description	setSize	enrichmentScore	NES	pvalue	p.adjust	qvalues	rank	leading_edge	core_enrichment
hsa04610	Complement and coagulation cascades	68	0.462973000310249	1.75705031182358	0.00070017447473245	0.0369651061418997	0.0353839941126151	1976	tags=28%, list=10%, signal=25%	720/721/718/5104/716/2152/715/5627/2159/1191/722/624/717/5054/733/5328/11326/10544/7035
hsa04974	Protein digestion and absorption	84	0.422480580660133	1.66246788538236	0.000893416462644101	0.0369651061418997	0.0353839941126151	1820	tags=25%, list=9%, signal=23%	1305/1299/1298/136227/1357/478/2006/3783/1295/5644/1296/1303/8645/85301/6543/91522/5222/80781/1307/1289/1360
hsa03010	Ribosome	132	0.383890600233306	1.62569393752822	0.000266557545619224	0.0369651061418997	0.0353839941126151	5300	tags=43%, list=26%, signal=32%	6193/6223/23521/6141/6205/6183/6158/6165/6206/6203/6134/6235/7311/6137/3921/200916/6202/6227/6228/6125/6171/6217/6233/6191/6187/6152/6142/64979/51373/6167/6208/6194/6201/6170/2197/6181/6207/6224/140801/6175/4736/6159/6161/219927/6204/6168/6135/65005/100529239/6173/11224/6144/6210/6160/6229/6128/6136
hsa05171	Coronavirus disease - COVID-19	199	0.330043488090821	1.47340244785578	0.000631673200359426	0.0369651061418997	0.0353839941126151	3854	tags=33%, list=19%, signal=27%	720/721/718/716/6193/6223/715/23521/3661/6141/6205/3576/6158/6165/717/6206/6203/6134/6235/7311/733/6137/6850/3921/200916/6202/6227/6228/6125/3455/6171/6217/6233/6191/6187/4793/6152/6142/1675/6300/5582/3716/6167/6208/6194/6201/6170/2197/6181/6207/3553/5335/8517/6224/2162/140801/6175/7124/4736/3569/5336/3654/57506/5600/6159
hsa05160	Hepatitis C	136	-0.428766858271317	-1.63600236382277	0.000887029712222527	0.0369651061418997	0.0353839941126151	4618	tags=36%, list=22%, signal=28%	440275/8503/4938/2885/3458/356/8837/836/4940/4599/3949/8737/4790/5604/6655/10197/3646/6041/5522/23586/1021/3434/6654/595/6774/1956/7533/4609/5610/6772/148022/1365/91543/5293/10000/8554/7157/7534/4939/100506658/841/7531/10686/7098/5521/1026/9074/3627/1366
hsa01240	Biosynthesis of cofactors	128	-0.429637737949223	-1.63233612407016	0.000769217134445616	0.0369651061418997	0.0353839941126151	4599	tags=41%, list=22%, signal=32%	210/26289/54995/25902/84274/80347/349565/221264/6697/27235/1719/5805/125061/4832/4337/55163/1738/10243/60490/4833/3145/10797/3620/53630/493911/27010/124454/4338/4144/79646/27430/79717/50808/8836/249/4143/1728/6999/7367/7358/2729/23057/23475/93100/10229/387787/129607/158067/11019/195814/122481/7364
hsa04012	ErbB signaling pathway	82	-0.472516924078085	-1.67536613613345	0.00123261779645935	0.045332943403116	0.0433939130683349	3634	tags=28%, list=18%, signal=23%	4690/817/5604/6655/868/2066/5578/6654/1956/4609/10718/5747/9542/5293/2549/5058/10000/1398/7039/1026/2065/374/685
hsa05416	Viral myocarditis	55	-0.546458774927616	-1.83916043478291	0.000459554095172481	0.0369651061418997	0.0353839941126151	3794	tags=40%, list=18%, signal=33%	836/959/1982/71/5551/3113/1605/3105/6443/284217/595/3908/3683/3133/3111/3134/3107/3106/841/6445/3112/3118
hsa04744	Phototransduction	21	-0.711065032456011	-1.94901410508678	0.00023384285483742	0.0369651061418997	0.0353839941126151	1312	tags=33%, list=6%, signal=31%	2792/5158/91860/9187/1258/1259/51806
