# Supplementary material for: Identifying the Role of Oxidative Stress-Related Genes as Prognostic Biomarkers and Predicting the Response of Immunotherapy and Chemotherapy in Ovarian Cancer
Source: Oxid Med Cell Longev. 2022 Dec 12;2022:6575534. doi: 10.1155/2022/6575534 (PMC9764017; doi:10.1155/2022/6575534)
Supplement: Supplementary 9 — Supplement Table 8: signaling pathway analysis in regard to HGF. [file 6575534.f9.txt]

ID	Description	setSize	enrichmentScore	NES	pvalue	p.adjust	qvalues	rank	leading_edge	core_enrichment
hsa04080	Neuroactive ligand-receptor interaction	236	-0.473330666918583	-1.26179960708668	0.0090422511800096	0.0234375150585849	0.0120309531489812	4104	tags=28%, list=20%, signal=22%	1511/6869/1241/2743/2563/5729/4987/57105/183/53637/147/5028/2922/5020/66004/6915/2568/624/2846/8973/1134/3953/5745/9934/1903/3269/3363/154/5737/5023/3274/185/2690/552/3357/10800/2908/10203/5739/1902/5031/2564/5733/5734/286530/6343/8698/5724/2149/718/5027/27334/1901/150/187/10161/5732/728/1909/140/3001/53829/2357/2359/719
hsa05225	Hepatocellular carcinoma	161	-0.477658030185763	-1.26240937327892	0.0132270145024293	0.0327141427388327	0.0167928348042091	5566	tags=45%, list=27%, signal=33%	6655/114112/2932/7042/6198/55193/3481/7473/8503/4088/1643/51426/324/8323/369/5604/4893/57492/4089/4609/5295/2475/2002/8110/7472/581/5335/5291/3845/7483/8325/2549/5728/578/1499/2885/5578/6464/1021/4233/5336/208/8322/5290/8313/5925/2949/81029/7477/595/653689/7474/25759/5594/7046/7039/1956/8324/1452/5579/54361/7481/4616/10000/6595/5293/1026/3082/7043/7048/8321/7040/3162
hsa05168	Herpes simplex virus 1 infection	462	-0.492297548380217	-1.32233843321007	9.79525512310821e-06	4.5995111012856e-05	2.36102259260274e-05	6861	tags=52%, list=33%, signal=36%	22835/84924/57711/90649/94039/199704/284406/126017/596/9451/93134/55659/163131/7771/90233/90321/9310/25888/256051/90987/7553/7565/84775/80264/84436/100129842/284323/340252/342926/147657/339559/284370/57474/55769/284349/5199/6885/7743/8717/7738/92285/7772/26149/90317/126068/7638/6892/57573/1965/7699/163081/7773/440275/7569/57209/10454/342909/162972/84911/3665/4792/59348/80110/54753/285268/148268/1…
hsa04934	Cushing syndrome	141	-0.49353077021261	-1.29765744098632	0.0136753831832138	0.0333164937241521	0.0171020338155167	5856	tags=48%, list=29%, signal=34%	1857/5331/4297/2767/54554/5929/2932/2773/818/7473/1031/8085/5151/5443/405/1388/324/8323/5604/2771/7472/949/183/9101/3164/7483/8325/3776/1499/9134/1021/5906/112/196883/8322/8313/5908/5925/81029/775/3708/3949/7477/595/7474/5594/817/109/64764/1956/196/8913/3709/115/8324/57552/185/8912/54361/7481/5567/1030/1026/113/5330/8321/90993
hsa05203	Viral carcinogenesis	161	-0.506579218091669	-1.33884560252974	0.00197941884935215	0.00616665103067399	0.00316546739066436	6802	tags=56%, list=33%, signal=38%	1386/1385/10013/1027/1237/245972/5700/3725/5933/3190/1642/8717/387/4193/85477/3665/4792/6722/998/5922/2957/6908/2960/8503/6714/9759/1388/9261/2959/7188/1654/6672/7534/8517/4893/5295/81/10379/3516/7187/5829/2033/581/5291/9114/3845/836/10014/1387/578/2885/23352/9134/1021/2934/896/7533/5290/87/4790/894/6774/5925/595/6777/5594/3718/3105/64764/3572/3716/6776/8850/5934/7185/4067/1233/3107/3133/5567/313…
hsa05131	Shigellosis	215	-0.512423665928733	-1.36108866769581	0.000257468283464926	0.000993091950507572	0.000509774295582184	6366	tags=55%, list=31%, signal=38%	3098/7316/3725/4671/57521/7335/6885/3710/8717/25851/81631/5331/387/30849/10454/4193/4792/2932/54874/6198/63916/10096/22863/8945/998/10892/10097/7189/10095/8503/1398/6714/10163/8915/23048/5747/7188/5289/8517/7414/23291/10092/5295/81/2475/7323/83660/1147/5829/29110/581/7132/3576/5335/5291/29108/6300/824/113026/3554/7124/5603/1399/4303/472/10392/831/5601/5336/1793/208/257397/8737/837/5290/5600/9564/…
hsa05206	MicroRNAs in cancer	189	-0.513301675113148	-1.36292134315371	0.00072813002286025	0.00259246293853539	0.00133076395155488	4933	tags=45%, list=24%, signal=34%	5598/11186/8503/1398/9759/63923/2744/324/10018/25/599/407006/5604/5243/4893/5743/4609/5295/2475/1946/407032/2033/6624/5335/3667/5291/3845/836/10014/5728/1387/407010/578/1399/472/2885/5154/9134/5578/6464/1021/4233/5336/4170/4855/407018/5290/27086/4790/894/6774/407007/595/407040/5594/5292/1956/8651/90427/3690/4853/5579/4851/7431/5155/7148/8434/3371/7168/23414/5293/960/1026/4082/1545/3678/6935/9839/…
hsa04066	HIF-1 signaling pathway	102	-0.514047822949065	-1.33432359367347	0.0150204900518947	0.0360491761245472	0.018504775268611	5338	tags=48%, list=26%, signal=36%	6198/818/1977/8503/405/3460/3479/7428/5230/1906/5604/5295/2475/2033/3458/5335/5291/8453/7076/1387/112399/5578/5209/8569/2321/5336/208/3091/5290/4790/6774/3570/5594/817/7037/1956/284/7010/3459/5579/3569/10000/3101/5293/1026/3162/5054/7099/1536
hsa04144	Endocytosis	239	-0.514698763863304	-1.37245366728889	0.000171178975219408	0.000684715900877632	0.000351478597591507	6843	tags=57%, list=33%, signal=38%	9765/23096/5338/147179/116983/2868/23527/30845/382/84552/832/8724/55737/3480/55048/57154/51028/22905/3800/137492/10254/56288/4087/387/3577/4193/57132/8027/2263/51534/5868/8218/7852/3799/8394/10096/998/10097/26119/116984/7189/9798/8411/10095/6714/8853/8729/4088/867/112936/378/9135/3306/829/868/29934/8723/64750/25978/10938/1759/51510/10092/6643/163/23396/5371/79643/9101/9372/6642/5584/160/11059/837…
hsa05132	Salmonella infection	244	-0.516426152868354	-1.37742965911767	7.05043024586755e-05	0.000308694513467714	0.000158459171955487	5831	tags=50%, list=28%, signal=37%	387/3836/1778/838/55823/10454/5868/4792/83547/3799/63916/10096/388/391/998/10097/51209/3839/7189/55770/7846/10095/5287/6416/26084/329/2317/9367/64746/8772/5289/5604/8517/7280/4609/23207/10092/84516/1147/51135/10640/581/7132/3576/55207/5291/51164/29108/6300/836/113146/7124/5603/578/1499/10006/330/10392/302/5601/208/79792/257397/8737/10810/23191/837/23339/57617/5290/5600/23265/112574/4615/9267/7944…
hsa04921	Oxytocin signaling pathway	136	-0.516782474408599	-1.35826730101335	0.004498909339188	0.0128995276628045	0.00662158989838569	5445	tags=48%, list=27%, signal=35%	2977/2773/818/4882/51422/814/5598/6714/27092/5021/5607/5604/5565/4893/5743/2771/2002/5532/3845/54776/5578/5562/5020/4775/4776/112/196883/5533/3762/781/5530/3759/775/3708/10398/4881/595/5594/93589/817/8536/8605/109/1956/4772/3709/4660/115/5579/1827/146850/7226/51806/4773/5567/2353/952/1026/113/4638/5330/4208/5294/23533/5997
hsa04931	Insulin resistance	98	-0.51870966609784	-1.34593148088642	0.019074966632756	0.0451115999198026	0.023156701713219	5491	tags=50%, list=27%, signal=37%	4792/2932/6198/32/10999/51422/22877/8503/5565/5170/5509/5295/2475/5792/183/7132/10062/3667/5291/6197/5728/7124/5562/6195/5601/1374/208/79660/5290/4790/6945/6774/5507/5465/6720/8473/9021/2308/64764/6196/5770/5579/3569/9882/10000/5293/948/9945/90993
hsa04915	Estrogen signaling pathway	112	-0.518986090297371	-1.35166320586915	0.00829497547231816	0.0218501792929356	0.0112161414174263	5840	tags=50%, list=28%, signal=36%	5331/4846/9166/6655/9568/3872/2773/5914/8503/6714/5443/3306/1388/3860/5604/4893/5295/2771/5291/3845/3310/2885/6464/112/208/196883/5290/3762/1509/3708/25759/5594/8202/10499/3868/7039/109/64764/1956/1839/3709/115/3866/2289/3312/25984/51806/10000/5567/2353/5293/113/5330/90993/4318/4313
hsa04360	Axon guidance	172	-0.523349826338173	-1.38511591778586	0.000755606271819847	0.0026610481746699	0.00136597014814114	6061	tags=53%, list=30%, signal=38%	10371/5062/6092/56288/387/4756/659/57689/2932/10507/80031/7852/2773/2050/818/91584/5998/998/85464/23365/8503/6714/1969/5747/7225/4690/6259/25/2242/5170/4893/5295/1946/2771/23380/5335/5291/5532/3845/55558/3985/2043/84628/56920/64218/5362/5578/4775/4776/4233/5336/5921/5533/7220/91653/5290/23654/5530/2042/81029/10398/9037/6091/7474/5594/5365/3611/817/8633/6586/22885/2048/10501/54434/9423/1808/2049/9…
hsa04550	Signaling pathways regulating pluripotency of stem cells	128	-0.52480713259937	-1.37789063895053	0.00301535139987831	0.00930451289105306	0.00477619570106038	5906	tags=55%, list=29%, signal=39%	6498/4087/1857/7994/659/2263/2932/84108/7473/84333/3977/5978/4090/8503/4088/56916/10336/3479/324/90/2247/8323/5604/4893/4089/4609/5295/7472/3976/5291/3397/6300/3845/7483/4093/8325/5603/1499/2885/208/8322/4086/5290/5600/8313/3198/6774/81029/7477/7474/9314/1432/5594/3718/3572/3716/6926/8324/3717/54361/6657/7481/3398/1749/10000/5293/3399/652/8321/3624
hsa04919	Thyroid hormone signaling pathway	115	-0.525327990904214	-1.37134528555356	0.00427582813668344	0.0123693599668342	0.00634944403755623	4219	tags=47%, list=21%, signal=38%	8503/6714/488/6257/9282/5604/5170/4893/4609/5295/2475/5208/2033/5335/5291/3845/113026/1387/1499/9969/5578/5336/208/4855/3091/5290/23389/595/6772/5469/5594/8202/10499/1734/2308/6256/3690/6567/8850/4853/5579/4851/1827/54361/9882/10000/5567/5293/3685/10231/489/5330/652/5350
hsa04390	Hippo signaling pathway	146	-0.526447866150254	-1.38796738162699	0.00113210881573487	0.00374289037038874	0.00192130174958226	5910	tags=51%, list=29%, signal=36%	56288/4087/1857/27113/7005/659/2932/84962/7042/8945/5519/7473/656/92597/11186/4088/329/324/8323/7534/23291/4089/4609/1742/25937/7472/6788/55233/5584/3397/7483/8325/1499/330/3996/9113/8322/154796/896/7533/4086/8313/894/7003/81029/7477/595/7474/7046/4092/650/353500/286204/392255/8324/85407/654/54361/6657/9231/26524/7481/3398/2246/7043/85409/122786/652/7048/8321/7040/5054/6591/3689
hsa04310	Wnt signaling pathway	153	-0.526490452883713	-1.39006537454446	0.00162912291858747	0.00512461966623633	0.00263057149858785	5302	tags=46%, list=26%, signal=34%	818/55366/51701/27130/8945/7473/4919/4088/57680/81839/324/2239/6259/8323/5663/23291/4089/4609/7472/5467/2033/5532/7483/8325/284654/22943/1387/1499/5578/4775/5601/4776/5533/8322/896/8313/894/5530/144165/81029/25805/7477/595/7474/7090/817/4772/8324/2487/1452/85407/166336/4920/5579/4316/54361/7481/23500/4773/5567/7091/27123/85409/5330/5880/8321/6422/5176/6423/6424
hsa04010	MAPK signaling pathway	275	-0.526503664093105	-1.40787037249829	6.0487284148404e-06	3.11077461334649e-05	1.59682387559696e-05	5643	tags=55%, list=27%, signal=40%	10454/9064/9344/6655/2263/9448/1326/7042/51701/6722/3481/998/5922/7189/5598/1398/6416/27092/1969/10746/2317/3306/5607/9261/3479/4149/4216/6789/5971/2247/369/2324/5604/8517/4893/4609/1946/2002/1147/57551/4214/51135/4803/6788/7132/3164/2005/5532/6300/3845/836/3554/6197/4254/2323/9693/7124/5603/8986/1399/3310/2885/5154/409/5578/6195/8569/9020/5906/4775/5601/4233/2321/208/5921/4763/5533/4915/10125/56…
hsa05130	Pathogenic Escherichia coli infection	184	-0.528456615339807	-1.40282980989428	0.000284809368655593	0.00108562629934603	0.000557274058793607	5132	tags=48%, list=25%, signal=37%	998/10097/23365/7189/7846/10095/4628/6714/10163/137075/10972/4690/8772/25/8517/7280/10092/1147/51135/581/7132/4643/3576/29108/6300/836/3554/7124/5603/79784/578/10006/5601/10427/4430/4642/10686/257397/8737/10810/23191/837/10672/5600/9138/4615/9267/4790/3654/2846/10802/2768/4627/840/1432/5594/4641/23118/114609/9632/9265/7100/64005/3569/84617/3606/356/7122/2353/9871/4644/1902/3688/8743/355/4629/2149…
hsa04020	Calcium signaling pathway	206	-0.533073043244925	-1.41681850550986	7.27603927567627e-05	0.000314324896709215	0.000161349362183418	3746	tags=38%, list=18%, signal=31%	4803/57105/6786/5335/57620/147/5532/2774/55283/113026/2668/5154/5578/5257/4233/2321/5336/3707/6915/196883/5533/4915/219931/624/6546/5530/9630/775/255231/3708/2185/5153/3269/817/8536/53373/3363/109/1956/154/8913/444/5737/3709/5023/3274/115/185/5579/8912/56034/5155/552/3357/10800/51806/5567/3791/5136/2246/5733/952/3082/489/5724/2149/113/5027/80310/4638/8877/5330/2769/2252/1909/5350/5159/5156
hsa05160	Hepatitis C	136	-0.535082669972742	-1.40636598560084	0.00111370095120655	0.00371999080609197	0.0019095469375001	4348	tags=50%, list=21%, signal=40%	8772/7534/9641/369/5604/8517/4893/4609/5295/10379/4600/7187/1147/29110/949/581/7132/8554/3458/10062/5291/3845/836/148022/637/7124/578/1499/2885/1021/317/208/10686/8737/23586/7533/5290/4790/6774/3454/5925/3455/3949/5465/595/6772/4938/5594/4940/9021/4599/6256/1956/6773/3716/7098/6041/3434/91543/356/7122/10000/5293/355/4939/1026/5010/3627
hsa04070	Phosphatidylinositol signaling system	89	-0.53513627380726	-1.38643722323066	0.0100884394781796	0.0259417015153189	0.0133164029870708	7353	tags=67%, list=36%, signal=43%	8898/808/22908/5333/55613/3636/56623/3628/5298/8760/3632/8525/3710/3631/160851/5331/80271/9807/200576/253430/8394/23262/5287/8503/4534/8396/8776/5289/5295/55361/3633/23396/5335/5291/9110/113026/1609/64768/55300/5728/5578/8867/3612/5336/3707/5297/5290/22876/4952/3708/8871/8821/3709/5305/9107/5579/51806/5293/5330/3635
hsa04218	Cellular senescence	152	-0.537369087524435	-1.41975517398072	0.000416958543405087	0.00153516554617327	0.000788031696866073	4144	tags=42%, list=20%, signal=34%	5604/4893/23291/4609/5295/2475/4683/3576/5291/5532/6300/3845/824/5728/5603/472/54822/9134/1021/4775/4776/208/5533/896/5290/5600/4790/894/5481/5530/5925/204851/3708/595/1432/5594/7046/3486/3105/2308/4772/678/3709/59341/5934/22808/3569/4616/3107/51806/3133/10000/4773/3134/3106/5293/1030/2113/1026/7043/83593/7048/7040/5054
hsa04657	IL-17 signaling pathway	83	-0.540651383387925	-1.39737249723771	0.010536806540443	0.0268813017252246	0.0137987188842933	5491	tags=57%, list=27%, signal=42%	4792/2932/1051/6374/84818/7189/5598/29761/2920/7188/5597/8772/9641/8517/5743/7187/1147/29110/3458/3576/6300/836/7124/5603/5601/257397/5600/4790/1432/5594/23118/6372/6279/2919/23765/3569/6361/7128/2354/2353/6280/4322/6347/3553/3627/6356/4318
hsa04722	Neurotrophin signaling pathway	115	-0.542039408029588	-1.41496969446875	0.00137141155808757	0.00435624847863109	0.00223615094094773	5566	tags=55%, list=27%, signal=40%	6655/4792/2932/818/998/7189/814/5598/8503/1398/5607/9261/4794/25/5663/5604/5170/4893/5295/4214/51135/4803/581/5335/3667/5291/6300/3845/6197/2549/5603/1399/2885/6464/6195/5906/5601/5336/208/4915/5290/5600/4790/5908/3654/3656/1432/25759/5594/817/4145/6196/2889/4215/11213/4217/356/51806/10000/4804/5293/10019/397
hsa01522	Endocrine resistance	93	-0.542644895653471	-1.40618206197058	0.00539123635998424	0.014929577612264	0.00766365582435906	5634	tags=56%, list=27%, signal=41%	4193/6655/28514/3714/6198/1031/8503/6714/5747/3479/369/5604/4893/5295/2475/581/5291/6300/3845/5603/54567/2885/6464/5601/112/208/182/4855/196883/5290/5600/5925/595/5469/1432/25759/5594/8202/109/1956/1839/115/4853/4851/10000/5567/2353/5293/1026/113/4318/4313
hsa04935	Growth hormone synthesis, secretion and action	104	-0.54353268706689	-1.4121455334621	0.00305234911522392	0.00932982182389197	0.00478918729101667	4890	tags=58%, list=24%, signal=44%	8503/1398/6416/1388/5747/3479/5604/4893/5295/2475/2771/4214/2033/5335/3667/5291/6300/3845/1387/5603/1399/2885/5578/6464/5601/112/5336/208/196883/5290/5600/9564/8835/6774/3726/775/3708/6772/6777/1432/25759/5594/9021/3486/109/64764/8651/3709/6776/115/5579/2690/3717/10000/5567/2353/5293/113/5330/90993
hsa04022	cGMP-PKG signaling pathway	146	-0.545358358812937	-1.43782444948489	0.000211989317561616	0.000827524564939319	0.000424785189280092	3058	tags=34%, list=15%, signal=29%	5138/7408/4775/4776/112/208/8654/196883/5533/10672/4209/624/6546/5530/775/3708/10398/4881/2768/5594/109/64764/154/4772/3709/115/3778/185/4205/3779/146850/3764/51806/10000/4773/5592/489/113/4638/5330/4208/150/5294/23533/1909/5350/140/5997/90993
hsa04912	GnRH signaling pathway	84	-0.548590663643662	-1.41694175283498	0.00583740084204028	0.0160281175662801	0.00822755872473117	6265	tags=57%, list=31%, signal=40%	3725/6654/3710/5331/2767/6655/818/998/5598/6714/6416/10746/4216/5604/4893/2002/4214/6300/3845/5603/2885/5578/5601/112/196883/5600/775/3708/2185/5337/1432/5594/817/8605/109/1956/1839/3709/115/5579/4215/51806/1958/5567/113/5330/4323/4313
hsa04014	Ras signaling pathway	209	-0.55176751280248	-1.46587070387899	7.43332459996087e-06	3.64908662179897e-05	1.87315037766159e-05	5185	tags=51%, list=25%, signal=38%	3481/998/5922/8036/9462/55770/11186/8503/2790/1969/2786/3479/5863/6789/25/2247/2324/5604/8517/4893/5295/1946/2002/1147/4803/29110/5335/5291/2788/3845/2549/5899/4254/2323/4303/2885/5154/2114/94235/5578/6464/5906/5601/4233/9610/2321/5336/208/5921/4763/9846/4915/5290/10125/4790/5908/55970/5337/5322/10235/25759/5594/7039/3363/5228/5878/8605/1956/284/3815/25780/7010/2793/5579/22808/56034/5155/2791/356…
hsa05223	Non-small cell lung cancer	72	-0.554866147638785	-1.42333363135697	0.0128042288583675	0.0319120780777776	0.0163811187013933	4898	tags=57%, list=24%, signal=44%	11186/8503/1643/51426/6257/6789/369/5604/5170/4893/5295/581/5335/5291/3845/578/2885/5578/1021/4233/5336/208/5290/6774/5925/595/6777/5594/3718/7039/6256/1956/6776/5915/5579/4616/10000/5293/1026/3082/83593
hsa05200	Pathways in cancer	485	-0.555237906324652	-1.49290263692184	1e-10	1.39859209381212e-09	7.17925766154368e-10	4898	tags=48%, list=24%, signal=38%	11186/8503/1398/3655/2790/4088/867/405/1643/329/51426/6257/3460/3673/331/5747/2786/7188/3479/7704/4149/7428/324/3675/1906/6789/10018/8772/25/4824/2247/8323/369/2324/5604/8517/4893/5743/4089/4609/5295/2475/2771/2002/7187/1147/7472/5467/2033/5371/581/183/3458/613/3576/5335/5291/8453/2788/3845/836/23462/51684/7483/8325/5728/5899/1387/4254/3563/3592/2323/637/54567/578/112399/1399/1499/2885/5154/94235…
hsa04210	Apoptosis	132	-0.555434837341644	-1.45868690058711	0.000390006898537427	0.00145243948420835	0.000745566726786611	4657	tags=49%, list=23%, signal=38%	329/8722/331/10018/8772/5604/8517/5170/4893/5295/1147/4803/581/153090/7132/5291/4000/3845/824/836/3563/637/7124/578/2081/472/330/9020/317/5601/4170/208/843/8737/5290/4790/1509/143/3708/840/1075/1508/3002/5594/5783/3709/7185/1514/4217/356/4616/10000/2353/1519/1512/5551/1522/5293/597/8743/355/1521/1520/1439/1513
hsa04071	Sphingolipid signaling pathway	115	-0.555738486917874	-1.4507305287954	0.000499162028709268	0.00181717412698655	0.000932792436854694	6005	tags=58%, list=29%, signal=41%	5526/5528/8717/134/5331/4846/387/5525/9294/2773/5519/8503/56848/9517/8560/5604/5170/4893/5295/2771/581/7132/53637/5291/6300/3845/5728/637/7124/5603/427/253782/5578/5601/208/8439/9846/10672/5290/5600/4790/55012/1509/624/340485/5337/2768/259230/1432/166929/1903/5594/10558/6609/5579/4217/10000/5293/8698/8877/2205/5330/1901/81537/5880/2207/140
hsa04924	Renin secretion	59	-0.5563949512061	-1.41241203216288	0.013799454199997	0.0333658444835748	0.0171273665640183	3903	tags=41%, list=19%, signal=33%	2771/183/5532/112/5533/5530/3759/775/3708/4881/5153/1508/154/3709/3778/185/51806/5567/5136/5734/358/5330/5732/1909
hsa05100	Bacterial invasion of epithelial cells	67	-0.557975862114836	-1.42691201734509	0.0120554523454467	0.030515363749412	0.0156641568304324	5519	tags=58%, list=27%, signal=43%	8218/63916/10096/391/998/10097/10095/8503/1398/6714/10163/867/26084/5747/7414/1759/10092/5295/5829/5291/2549/1399/1499/1213/6464/4233/1793/5290/9564/25759/3611/858/9844/857/5293/3688/3678/3059/2335
hsa04330	Notch signaling pathway	58	-0.55935901199689	-1.41724507945306	0.0195708668034693	0.0459489916255365	0.0235865519065457	5856	tags=59%, list=29%, signal=42%	1857/55534/7088/1840/28514/51107/3714/9253/5663/171558/3516/2033/9794/23462/1387/54567/8650/182/4855/6868/23220/6310/9612/7090/3955/342371/151636/84441/8850/4853/4851/4242/26508/7091
hsa05218	Melanoma	65	-0.560230478324043	-1.42971663043532	0.0125172479658072	0.0314386693094692	0.0161381083524891	4890	tags=55%, list=24%, signal=42%	8503/1643/51426/3479/2247/369/5604/4893/5295/581/5291/3845/5728/578/5154/1021/4233/208/5290/5925/595/5594/1956/4286/56034/5155/4616/10000/5293/2246/1026/3082/80310/2252/5159/5156
hsa04750	Inflammatory mediator regulation of TRP channels	87	-0.563512018766122	-1.45772367688271	0.00308934683606038	0.00935465770919216	0.00480193605605056	3966	tags=44%, list=19%, signal=35%	5295/4803/5335/5291/6300/3554/5603/5578/41/5601/112/5336/196883/5290/5600/624/3556/3708/1432/3269/817/5583/8605/109/3709/59341/115/5579/3357/51806/5567/5293/5734/113/5330/51393/3553/5732
hsa05215	Prostate cancer	93	-0.566491732052195	-1.46797752682656	0.00131618777808824	0.00422222613960981	0.00216735454859763	4304	tags=46%, list=21%, signal=37%	4824/369/5604/8517/5170/4893/5295/2475/1147/2033/5291/3845/5728/1387/1499/2885/5154/9134/208/5290/4790/5925/595/2119/5594/7039/2308/64764/1956/5327/2078/56034/5155/10000/5293/1026/80310/6935/90993/5328/5159/4318/5156
hsa04270	Vascular smooth muscle contraction	116	-0.566816246199251	-1.47976969324328	0.000298479933409678	0.00112450579563646	0.000577231694966085	3791	tags=40%, list=18%, signal=33%	10266/183/147/54776/79784/5578/112/196883/10672/9138/775/3708/10398/4881/2768/4627/5322/10267/5594/5583/8605/109/3709/4660/115/3778/185/5579/3779/552/10268/51806/5567/5592/10203/5739/4629/800/26279/113/4638/5330/5320/1909/72/59
hsa04928	Parathyroid hormone synthesis, secretion and action	97	-0.567577418308507	-1.47260784636916	0.00116892456426477	0.00378731558821787	0.00194410611740878	4617	tags=52%, list=22%, signal=40%	1388/5144/6257/4326/369/5604/10893/10568/2771/409/5578/112/196883/64386/10672/9138/4209/3708/5745/5337/2768/5594/5141/6256/109/64764/1956/1839/3709/115/11214/5744/4205/5579/7421/408/2625/1958/5567/2353/4322/860/1026/113/5142/5330/4208/9935/90993/4323
hsa05120	Epithelial cell signaling in Helicobacter pylori infection	68	-0.568457469047353	-1.45521078387793	0.00644516497541201	0.017548180269189	0.00900783782498981	5132	tags=56%, list=25%, signal=42%	998/1445/6714/6416/529/2920/535/537/8517/1147/3576/5335/9114/523/6300/836/5603/10392/9020/5601/4233/5336/6868/5600/4790/528/102/1432/3579/1956/1839/10312/526/2919/4067/58494/83700/6352
hsa04068	FoxO signaling pathway	123	-0.569826136341073	-1.49348142670419	0.000162110026722544	0.000656545608226301	0.000337018213449499	5050	tags=53%, list=25%, signal=40%	847/9454/51422/8503/4088/3479/6789/10018/369/5604/5565/5170/4893/4089/5295/1147/2033/3667/5291/6300/3845/5728/1387/5603/4303/472/2885/5562/5601/208/5290/5600/894/6774/6648/23710/595/1432/5594/7046/1263/2308/114907/1956/5934/116986/3569/356/4616/10000/10769/80854/5293/1030/8743/1026/7043/3586/8698/6446/1901/7048/3575/7040/10365
hsa05202	Transcriptional misregulation in cancer	156	-0.569928111343718	-1.5049231842186	1.63362914598405e-05	7.35133115692822e-05	3.77358779335497e-05	4710	tags=50%, list=23%, signal=39%	1643/3207/329/51426/6257/5747/3479/7704/4149/1655/171558/7030/4609/26471/958/5371/581/3576/51274/2005/578/472/5154/330/862/7403/4233/2321/8842/4086/64919/4790/894/55589/51513/5218/2119/3002/3486/2308/6256/8013/4286/5327/3695/64332/4299/7185/5468/2078/3569/4005/4616/3398/3087/5090/4804/860/597/1026/4066/4208/2115/7048/2313/1050/861/6935/2209/4094/6688/3560/3684/942/5328/4318/929/1436
hsa05212	Pancreatic cancer	76	-0.570993040864215	-1.47129279267754	0.00383349633196338	0.0111896649689742	0.00574388260265731	5408	tags=57%, list=26%, signal=42%	7042/6198/998/8503/4088/1643/51426/369/5604/8517/4089/5295/2475/1147/581/5291/3845/5899/578/1021/5601/208/5290/4790/6774/5925/5337/595/6772/5594/7046/7039/1956/3716/4616/10000/5293/1026/7043/7048/5880/9459/7040
hsa05170	Human immunodeficiency virus 1 infection	189	-0.571317122548247	-1.51696426834868	1.06954649190082e-06	5.97470798923908e-06	3.06693912378094e-06	6129	tags=61%, list=30%, signal=43%	85363/200316/6885/5062/3710/1642/8717/8905/2767/6892/200315/10454/4792/7852/2773/6198/8945/7189/8503/1398/8065/2790/2923/5747/2786/7188/8450/8772/5604/8517/27350/4893/23291/5295/2475/2771/1147/5829/51135/29110/581/7132/164/5335/5291/5532/2788/6300/3845/836/3985/637/7124/5603/578/1399/472/94235/5578/4775/5601/4776/5336/208/5533/8737/5290/6891/5600/4615/4790/3654/5530/55970/3708/162/2185/1432/5594/…
hsa04371	Apelin signaling pathway	129	-0.571598319985857	-1.50111062750342	8.29128147995031e-05	0.000344407076859474	0.000176791157062368	5871	tags=56%, list=29%, signal=40%	4087/81631/5331/4846/6548/30849/8862/2773/6198/51422/814/2790/4088/56848/9759/3991/2786/5289/5604/5565/4893/4089/2475/2771/4635/2788/3845/10014/94235/5562/112/208/182/196883/10672/4209/6546/55970/3708/595/5594/7046/8678/109/5346/3709/5327/115/2793/185/4205/22808/146850/2791/51806/10000/1958/5567/113/59345/4638/8877/5330/4208/5294/23533/6696/187/54331/10365/5054/59
hsa04917	Prolactin signaling pathway	63	-0.57162481591832	-1.45818696264144	0.00660079188931197	0.0176829431539009	0.00907701435450403	5566	tags=63%, list=27%, signal=46%	6655/9655/2932/8503/6714/122809/5604/4893/1154/5295/5291/6300/3845/5603/2885/6464/5601/208/5290/5600/8835/4790/894/6774/9306/595/6772/3659/6777/1432/25759/5594/9021/8651/6776/3717/8792/10000/2353/5293
hsa05412	Arrhythmogenic right ventricular cardiomyopathy	69	-0.573592033278958	-1.46858810599253	0.00466160111584199	0.0132487610660772	0.00680085850695323	5400	tags=49%, list=26%, signal=36%	1605/3691/6442/1756/3655/27092/8515/488/3673/3675/4000/1499/781/6546/775/93589/6443/3690/3908/3695/3694/1674/3693/8516/3672/3680/6444/3688/3685/489/2697/3678/3676/22801
hsa04370	VEGF signaling pathway	56	-0.573723338913239	-1.45157651251576	0.0136762150163958	0.0333164937241521	0.0171020338155167	5132	tags=62%, list=25%, signal=47%	998/8503/6714/56848/5747/9261/5604/4893/5743/5295/5829/5335/5291/5532/6300/3845/5603/5578/5336/208/5533/5290/5600/5530/1432/25759/5594/8605/5579/10000/4773/3791/5293/8877/5880
hsa05220	Chronic myeloid leukemia	76	-0.574112451742196	-1.47933066076649	0.00320354036964026	0.00954153333973859	0.00489786311786451	5634	tags=62%, list=27%, signal=45%	4193/6655/4792/7042/8503/1398/4088/867/1643/51426/25/369/5604/8517/4893/4089/4609/5295/1147/581/613/5291/3845/578/1399/2885/6464/1021/208/9846/5290/4790/5925/595/6777/25759/5594/7046/6776/4616/10000/5293/1026/7043/7048/861/7040
hsa04142	Lysosome	129	-0.574294410155528	-1.50819100101904	6.26079996471421e-05	0.000277876601173617	0.000142639710803871	4623	tags=51%, list=23%, signal=40%	535/9583/8722/537/135112/26503/1511/175/27074/3920/53/164/9114/2629/23335/1497/427/1213/23062/5538/950/2548/5476/3423/3073/2517/1509/4864/4126/4074/23431/23312/55353/162/2581/1075/1508/9516/6556/3074/4669/2799/2760/4125/410/6609/10312/1200/968/54/3482/4668/1514/79158/5641/411/23659/5660/1519/1512/1522/1521/3988/1520/7805/1513
hsa04810	Regulation of actin cytoskeleton	199	-0.575542178983328	-1.52798081138915	2.52056814861466e-07	1.57050784644452e-06	8.06173618382826e-07	5566	tags=54%, list=27%, signal=40%	6655/2263/85477/200576/7852/8394/2245/10096/3691/998/85464/10097/23365/10095/4628/8503/1398/6714/3655/10163/8515/3673/5747/324/3675/8396/8874/2247/369/5604/7414/4893/10092/5295/81/5829/23396/5291/3845/54776/3985/79784/221178/1399/5154/1793/10788/2934/23191/10672/5290/9564/9138/87/624/7410/2846/2909/55970/10398/2768/4627/8826/5594/1956/3690/4660/54434/3695/3694/5305/3693/8516/89846/22808/56034/515…
hsa05214	Glioma	73	-0.576319161639351	-1.47803706246517	0.00361453726237719	0.0106464552091837	0.00546504198522102	4971	tags=56%, list=24%, signal=43%	814/8503/1643/51426/3479/369/5604/4893/5295/2475/581/5335/5291/3845/5728/578/2885/5154/5578/6464/1021/5336/208/5290/5925/595/25759/5594/817/8536/7039/1956/5579/5155/4616/51806/10000/5293/1026/5159/5156
hsa05222	Small cell lung cancer	91	-0.577809607651764	-1.49753222418225	0.000508320710397255	0.00182995455743012	0.000939352891728261	4988	tags=55%, list=24%, signal=42%	7189/8503/3655/1643/329/51426/6257/3673/331/5747/7188/4149/3675/8517/5743/4609/5295/7187/1147/581/5291/836/5728/578/330/9134/3913/1021/317/208/5290/4790/5925/595/6256/3908/1284/5915/7185/4616/10000/1282/5293/1030/3688/3685/1026/3912/3910/2335
hsa05165	Human papillomavirus infection	304	-0.577814867953055	-1.54778725314443	1.28339193239762e-10	1.59930379268011e-09	8.20955163234102e-10	4699	tags=48%, list=23%, signal=38%	529/7248/8515/63923/535/3673/5747/324/3675/537/8772/8323/5663/9641/5604/8517/4893/5743/5295/10379/2475/3516/4600/7187/1147/5829/7472/29110/2033/581/7132/5584/5291/9114/523/3845/9794/836/23462/7483/8325/148022/27175/5728/1387/7124/578/1499/472/2885/23352/9134/3996/3913/1021/208/7448/182/4855/8322/131873/896/5290/8313/4790/55012/894/528/3454/5925/81029/3455/7477/595/6772/3659/7474/5594/4599/3955/11…
hsa05211	Renal cell carcinoma	65	-0.581206310183128	-1.48324726971054	0.00495993741455881	0.0138536182958367	0.00711134402450355	5566	tags=62%, list=27%, signal=45%	6655/7042/998/8503/1398/405/7428/369/7030/5604/4893/5295/2033/5291/8453/3845/2549/1387/112399/1399/2885/201163/5906/4233/208/3091/5290/5908/5594/7039/2889/5155/10000/2034/5293/2113/1026/3082/7043/7040
hsa04217	Necroptosis	116	-0.582610660746969	-1.52100368420059	8.29128147995031e-05	0.000344407076859474	0.000176791157062368	4657	tags=48%, list=23%, signal=38%	329/3460/331/7188/8772/25978/51510/10379/79643/581/7132/3458/29108/824/148022/2752/637/7124/330/54822/5601/8737/9525/2512/6774/5481/3454/11035/3455/6772/6777/81030/55072/6775/817/3718/8605/6773/3716/6776/1540/7098/6609/3459/3717/197259/356/7128/90865/8743/355/114548/834/3553/7099/1536
hsa05221	Acute myeloid leukemia	66	-0.582808903991228	-1.486716259814	0.0032099602902207	0.00954153333973859	0.00489786311786451	4189	tags=53%, list=20%, signal=42%	369/5604/8517/4893/4609/5295/2475/1147/5467/5371/5291/3845/2885/862/208/5290/4790/6774/595/6777/5594/5292/6776/3815/11040/10000/5293/597/1050/861/2209/6688/3684/929/1436
hsa04015	Rap1 signaling pathway	196	-0.583643414221942	-1.54928950139979	1.67562577942488e-07	1.08580550506732e-06	5.57366048735013e-07	4225	tags=47%, list=21%, signal=38%	2247/2324/5604/4893/5295/1500/1946/2771/83660/4803/5584/5335/5291/5028/3397/6300/3845/5899/4254/9693/5603/1399/6494/1499/5154/5578/7408/5906/4233/2321/112/208/196883/51466/23094/5290/5600/9564/5908/7410/2846/10235/1432/5594/7094/5228/109/1956/3690/115/284/3815/25780/7010/2889/5579/22808/56034/5155/51806/57568/10451/10000/9732/1435/3791/7409/4804/1902/5293/3688/2246/3082/5587/2149/113/80310/83593/…
hsa01521	EGFR tyrosine kinase inhibitor resistance	78	-0.583866957525609	-1.50667137496869	0.00115166720354497	0.00376909266614719	0.00193475192089427	5566	tags=65%, list=27%, signal=48%	6655/2263/2932/6198/1977/8503/6714/3479/10018/2247/369/5604/4893/5295/2475/2621/581/5335/5291/3845/2549/5728/2885/5154/5578/6464/4233/5336/208/4763/5290/6774/3570/25759/5594/7039/1956/3716/5579/3717/3569/56034/5155/10000/3791/5293/3082/80310/558/5159/5156
hsa04622	RIG-I-like receptor signaling pathway	52	-0.587073975365429	-1.47491792775801	0.00887635298932428	0.0231930513592021	0.0119054649602142	6046	tags=67%, list=29%, signal=48%	6885/8717/7706/9755/3665/4792/64343/7189/1654/10010/8772/79671/9641/8517/7187/1147/4214/29110/3576/6300/3592/7124/5603/54941/5601/843/8737/23586/5600/4790/64135/1432/1540/79132/3627
hsa05410	Hypertrophic cardiomyopathy	79	-0.590422172696465	-1.52479424130284	0.000811369364041901	0.00282670617150082	0.0014510057670472	5408	tags=57%, list=26%, signal=42%	7042/1605/3691/51422/6442/1756/3655/27092/8515/488/3673/3479/3675/1906/5565/183/4000/7124/5562/781/6546/775/93589/6443/3690/3908/3695/3694/7169/1674/3693/8516/3569/3672/3680/7168/6444/3688/3685/7043/489/3678/3676/7040/22801
hsa05418	Fluid shear stress and atherosclerosis	134	-0.59290879725787	-1.55715448324826	2.6999575534908e-06	1.43407581529675e-05	7.36140282056162e-06	4933	tags=49%, list=24%, signal=38%	5598/8503/6714/6416/5607/5747/6612/1906/90/8517/5295/1147/2817/7132/6401/3458/5291/6300/3554/7124/5603/1499/5154/5562/5601/208/5290/5600/4790/2949/653689/1432/858/59341/3690/5327/4205/1514/857/4217/5155/51806/10000/2353/1003/3791/5293/6383/3685/6347/1843/3383/4208/653361/652/6382/7056/5880/3553/4688/5175/10365/3162/4318/7412/4313
hsa04350	TGF-beta signaling pathway	91	-0.594231389899789	-1.54009321273151	0.000130368783663072	0.000534677036795384	0.000274460597185415	5871	tags=58%, list=29%, signal=42%	4087/387/4756/659/7042/6198/5519/656/4090/4088/4091/90/9241/64750/4089/4609/5308/2033/9372/3458/3397/4093/1387/7124/2331/4086/64388/79875/25805/5594/7046/4052/4092/650/353500/392255/654/3398/57817/10468/26585/4681/1030/8646/7043/3399/652/7048/7040/7057/3624/2200/1634
hsa04926	Relaxin signaling pathway	121	-0.596286248106419	-1.56134178065017	1.25740094627686e-05	5.81997009419576e-05	2.9875090152142e-05	4890	tags=50%, list=24%, signal=39%	8503/6714/6416/2790/1388/2786/1906/5604/4893/5295/2771/5291/2788/6300/3845/5603/2885/94235/409/5578/6464/5601/112/208/196883/5290/5600/4790/55970/1432/25759/5594/7046/109/64764/1956/115/1284/2793/2791/408/10000/5567/2353/1282/4322/5293/113/59345/5330/2769/7048/54331/7040/90993/4318/1278/4313/59/1277/1281
hsa04151	PI3K-Akt signaling pathway	311	-0.597218020957212	-1.59929256672062	1e-10	1.39859209381212e-09	7.17925766154368e-10	4672	tags=48%, list=23%, signal=38%	7248/8515/63923/1388/23035/3673/5747/2786/3479/3675/10018/2247/7534/2324/5604/8517/5170/4893/4609/5295/2475/1946/1147/4803/3164/3667/5291/5586/2788/3845/5728/4254/3563/2323/2885/5154/94235/9134/5578/5562/3913/1021/4233/2321/4170/208/7448/131873/896/7533/4915/5290/4790/55012/894/3574/3454/2846/55970/3455/595/3570/5594/3718/1101/3381/7039/5228/6256/64764/1956/3716/3690/3908/3695/1284/284/3694/3815/…
hsa04740	Olfactory transduction	46	-0.600194351930887	-1.48437582848052	0.00660381519019138	0.0176829431539009	0.00907701435450403	3508	tags=33%, list=17%, signal=27%	2774/2788/409/5138/6546/5153/817/109/83988/408/51806/5567/5592/5136/5997
hsa05414	Dilated cardiomyopathy	83	-0.602926767490554	-1.55833002305521	0.000173446213487218	0.000685324063047058	0.000351790779601804	5408	tags=58%, list=26%, signal=43%	7042/1605/3691/6442/1756/153/3655/27092/8515/488/3673/3479/3675/183/4000/7124/112/196883/781/6546/775/93589/109/6443/3690/115/3908/3695/3694/7169/1674/3693/8516/3672/5567/3680/7168/6444/3688/3685/7043/489/113/3678/3676/5350/7040/22801
hsa05161	Hepatitis B	148	-0.606460782077524	-1.59982200447018	2.73237580595273e-07	1.67035803986544e-06	8.57428753407211e-07	4988	tags=62%, list=24%, signal=47%	7189/8503/6714/6416/4088/1643/1388/1654/537/8772/7534/9641/369/5604/8517/4893/4089/4609/5295/2002/7187/1147/4214/51135/29110/2033/581/3576/5291/6300/3845/836/148022/1387/637/7124/5603/2885/9134/5578/317/4775/5601/4776/208/843/23586/5290/5600/4615/4790/3654/6774/3454/5925/64135/2185/6772/6777/1432/6775/5594/7046/23118/3718/114609/64764/6773/4772/3716/6776/7098/5579/3717/3569/356/10000/4773/2353/19…
hsa04072	Phospholipase D signaling pathway	133	-0.607030109412954	-1.5935187489528	1.2076521339073e-06	6.63185239637226e-06	3.40426471288765e-06	4144	tags=49%, list=20%, signal=39%	5604/4893/1759/5295/2475/23396/183/3576/5335/5291/3845/1609/2549/5899/4254/2885/5154/5578/6464/112/5336/208/196883/9846/10672/5290/9267/2846/2185/5337/2768/56894/25759/5594/3579/8605/109/1956/5737/115/3815/9265/185/22808/56034/5155/146850/552/10000/1902/5293/2149/113/80310/8877/2205/5330/5294/23533/57121/10161/2207/27128/5159/5156
hsa04623	Cytosolic DNA-sensing pathway	46	-0.607138062485024	-1.50154872601507	0.00492425403118253	0.0138536182958367	0.00711134402450355	4194	tags=43%, list=20%, signal=35%	9641/8517/1147/29110/29108/8737/23586/4790/11035/81030/9447/3569/3606/90865/834/3553/3627/6351/388372/6352
hsa04621	NOD-like receptor signaling pathway	156	-0.614070305590506	-1.62148281727065	5.08715429338047e-08	3.36375100215362e-07	1.72668180097554e-07	4668	tags=56%, list=23%, signal=43%	79184/329/2920/331/7188/10010/8772/79671/9641/8517/55669/10379/7187/1147/51135/29110/3576/29108/5586/6300/148022/7124/5603/24145/330/10392/54822/5601/140609/79792/257397/8737/7158/837/5600/4615/4790/23710/3454/11035/3428/3455/3708/6772/1432/1508/55072/4938/5594/4940/114769/23118/22861/22900/6773/3709/3716/58484/6041/10628/84674/2919/9447/64127/3569/3606/9051/7226/7128/2633/2635/4939/6347/114548/5…
hsa04936	Alcoholic liver disease	120	-0.615300854474549	-1.61179047988897	2.45920042233834e-06	1.3279682280627e-05	6.81673099525365e-06	4348	tags=54%, list=21%, signal=43%	8772/8310/9641/5565/8517/7187/1147/51135/29110/7132/51/3576/6300/836/50507/148022/3592/7124/5603/1499/5562/9020/5601/1374/208/126129/257397/8737/217/5600/4615/4790/3654/9663/5465/6720/595/1432/23118/219/717/2308/114609/79966/2919/721/23765/3569/4217/356/10000/355/720/6319/718/3553/125/728/23643/929/712/7099/714/713/719
hsa05163	Human cytomegalovirus infection	203	-0.619736118617079	-1.6465221505113	1e-10	1.39859209381212e-09	7.17925766154368e-10	4890	tags=60%, list=24%, signal=46%	8503/1398/6714/2790/7248/1388/2923/5747/2786/7188/8772/5604/8517/4893/5743/4609/5295/2475/2771/3588/2002/1147/5829/29110/581/7132/3576/5291/5532/2788/6300/3845/836/3554/637/7124/5603/578/1399/1499/2885/94235/5578/1021/4775/4776/112/208/196883/5533/8737/6376/10672/5290/6891/5600/9564/9138/4790/6774/5530/5925/55970/3708/2185/2768/595/3570/1432/5594/3579/3105/109/64764/1956/4772/3709/3716/3690/115/1…
hsa04666	Fc gamma R-mediated phagocytosis	91	-0.62095735632773	-1.60935996672494	1.43815723701568e-05	6.56285837736731e-05	3.36884867974021e-05	5338	tags=59%, list=26%, signal=44%	6198/8394/10096/998/10097/10095/8503/1398/10163/8853/56848/5604/10092/5295/23396/5335/5291/3985/50807/1399/5578/7408/5336/1793/208/2934/10810/9846/5290/55616/7410/5337/5594/8605/273/5579/2215/4067/10451/10000/7409/5293/4082/8877/653361/5880/7454/2213/2209/3635/2212/3055/5788/2214
hsa05167	Kaposi sarcoma-associated herpesvirus infection	177	-0.624218227314822	-1.65299729076427	9.1473454621233e-10	9.56045138621919e-09	4.907574135876e-09	4890	tags=62%, list=24%, signal=47%	8503/6714/6416/2790/2920/9261/2786/8772/2247/9641/5289/5604/8517/4893/5743/4609/5295/10379/2475/7187/1147/29110/2033/581/7132/3576/5335/5291/5532/2788/6300/3845/836/148022/1387/637/5603/578/1499/94235/1021/4775/5601/4776/5336/208/5533/3091/5290/5600/4790/6774/5530/3454/5925/55970/3455/3708/595/6772/1432/5594/7314/8678/4277/3105/100507436/3572/6773/4772/3709/3716/7098/2793/131450/2919/3459/1827/37…
hsa05205	Proteoglycans in cancer	191	-0.625735001835428	-1.66170654252503	1e-10	1.39859209381212e-09	7.17925766154368e-10	4225	tags=52%, list=21%, signal=42%	2247/8323/369/5604/5170/4893/4609/5295/2475/2002/5829/7472/2817/5335/5291/6300/3845/54776/836/7483/8325/2549/7124/5603/1499/2885/5578/4233/5336/208/7448/8322/3091/5290/5600/9138/6774/7410/81029/3708/7477/595/7474/8826/1432/5594/817/858/1956/1839/3709/3690/4660/2318/8324/3693/2316/5579/22808/1514/54361/857/356/7481/117581/10855/10451/10000/4478/5567/3791/7409/5293/6383/3688/960/355/3685/5329/1026/…
hsa05417	Lipid and atherosclerosis	189	-0.626479721636111	-1.6634322954092	1e-10	1.39859209381212e-09	7.17925766154368e-10	4194	tags=54%, list=20%, signal=44%	9641/8517/5170/4893/5295/7187/1147/51135/29110/958/581/7132/6401/7436/3576/5335/5291/5532/29108/6300/3845/836/148022/57534/3592/637/7124/5603/2081/3310/5578/5906/317/4775/5601/208/5533/5290/5600/9138/4615/4790/5908/3654/6774/6648/5530/7410/3708/3949/840/1432/5594/817/23118/114609/6256/4772/2919/3717/5468/959/4067/3569/3606/9619/4217/3312/356/5452/51806/19/10451/10000/4773/2353/10333/6403/7409/529…
hsa05134	Legionellosis	56	-0.627142381612422	-1.58673194797371	0.000995788849837943	0.00340491163892068	0.00174781039294824	4649	tags=55%, list=23%, signal=43%	2920/3306/23786/7415/51128/9554/3576/29108/836/3592/7124/1378/3310/317/4615/4790/840/58484/2919/7100/3569/3606/3312/718/834/3553/7097/3684/929/7099/3689
hsa04660	T cell receptor signaling pathway	97	-0.627608647340708	-1.62836185639208	7.8501347280943e-06	3.79618455507844e-05	1.94865873847431e-05	4480	tags=73%, list=22%, signal=57%	6654/6885/5062/387/5777/6655/1326/4792/2932/998/10892/8503/8915/4690/4794/868/5604/8517/5170/4893/5295/1147/3458/5335/5291/5532/6300/3845/7124/5603/2885/9020/4775/5601/208/5533/5290/10125/5600/4790/5530/7410/9402/1432/5594/4772/3702/959/940/1493/5133/29851/7535/10451/10000/4773/2353/84433/919/7409/917/5293/926/3586/3932/925/915/920/916/3937/5788
hsa05162	Measles	122	-0.627710964261815	-1.64448063025161	3.41016222873165e-07	2.00889556747101e-06	1.03120695146335e-06	4359	tags=67%, list=21%, signal=53%	27113/440275/3665/4792/2932/103/25898/51209/7189/8503/3306/9367/868/8772/9641/8517/5295/10379/4600/7187/1147/51135/29110/581/5291/836/3592/637/578/3310/9134/1021/317/5601/4179/208/23586/896/5290/4615/4790/3654/894/6774/3454/64135/3455/595/6772/6777/4938/4940/4599/23118/3718/6773/3716/6776/6504/940/3569/3312/356/10000/4478/7128/2353/917/5293/355/4939/3559/30835/3553/2213/7097/915/3561/916/3560/512…
hsa04625	C-type lectin receptor signaling pathway	98	-0.628096097006426	-1.62976394163316	7.43332459996087e-06	3.64908662179897e-05	1.87315037766159e-05	5138	tags=65%, list=25%, signal=49%	64170/10892/23365/8503/6714/8915/9261/868/5971/9641/8517/4893/5743/5295/10379/1147/5291/5532/29108/6300/3845/3592/7124/5603/9020/4775/5601/4776/5336/208/5533/5290/5600/4790/5530/3708/6772/3659/1432/5594/1263/6773/4772/3709/1540/6367/22808/3569/6361/51806/10000/4773/1960/26253/5293/30835/3586/114548/834/3553/1959/2207/4046/64581
hsa05169	Epstein-Barr virus infection	184	-0.629662936936469	-1.67148998135273	1.75363450254764e-10	2.02920563866227e-09	1.04163252406965e-09	4890	tags=58%, list=24%, signal=44%	8503/5713/6416/1643/51426/2923/7188/4794/10018/8772/5971/9641/8517/4609/5295/10379/3516/7187/1147/51135/29110/958/581/5291/6300/836/637/7124/5603/578/79685/9134/1021/9020/317/5601/5336/208/8737/23586/896/5290/6891/5600/4615/4790/3654/894/6774/3454/5925/3455/9612/595/6772/1432/4938/4940/23118/3718/3105/6773/3716/965/953/4067/7431/29760/3569/6890/4734/4616/3107/956/3133/3108/10000/7128/3134/919/864…
hsa05135	Yersinia infection	133	-0.63406286557226	-1.66448261566673	2.84645985057478e-08	2.14477439903774e-07	1.10095631919416e-07	5643	tags=68%, list=27%, signal=50%	10454/4210/4792/2932/63916/8394/10096/391/998/10097/23365/7189/10095/8503/1398/6714/10163/6416/5747/8874/5604/8517/10092/5295/1147/5829/51135/29110/23396/3576/5335/5291/29108/5586/6300/6197/148022/7124/5603/1399/6195/4775/5601/1793/208/5290/5600/9564/9138/4615/4790/3654/7410/2185/1432/5594/23118/9844/6196/4772/58484/9815/3569/3606/7535/10451/10000/4773/2353/7409/5293/3688/926/6347/8935/3586/3932/…
hsa04510	Focal adhesion	192	-0.63765243088536	-1.69362473990189	1e-10	1.39859209381212e-09	7.17925766154368e-10	4890	tags=60%, list=24%, signal=46%	8503/1398/6714/3655/8515/329/2317/63923/3673/331/5747/3479/3675/2324/5604/5170/7414/5295/81/83660/2002/5829/23396/5291/824/54776/5728/29780/1399/1499/2885/5154/330/5578/6464/3913/7408/5906/5601/4233/2321/1793/208/7448/131873/896/55742/5290/9564/87/5908/894/7410/2909/10398/595/25759/5594/3611/7094/1101/3381/5228/858/1956/3690/4660/3908/3695/2318/1284/64098/3694/2889/3693/8516/2316/5579/56034/857/5…
hsa04668	TNF signaling pathway	109	-0.637976383660936	-1.65878502108403	7.45744718825635e-07	4.23896998069308e-06	2.17594950275993e-06	4890	tags=66%, list=24%, signal=51%	8503/6416/329/2920/1388/7188/1906/8772/5604/8517/5743/5295/7187/1147/3976/8809/153090/7132/6401/5291/6300/83737/836/7124/5603/8986/330/9020/5601/208/182/843/3600/257397/8737/6376/5290/5600/4790/3726/11035/840/3659/1432/5594/9021/23118/64764/6372/2919/4049/7185/64127/3569/4217/197259/10000/7128/2353/1435/5293/355/6347/3383/3553/3627/7133/90993/4323/6352/4318/7412
hsa04670	Leukocyte transendothelial migration	103	-0.638944581136478	-1.65957670096214	6.51343704192057e-07	3.76848857425404e-06	1.93444182823957e-06	4118	tags=58%, list=20%, signal=47%	7070/7414/5295/81/1500/2771/5829/5335/5291/83692/6300/5603/6494/1499/5578/7408/5906/5336/10686/5290/5600/9564/87/5908/7410/2909/10398/2185/1432/4267/90952/3702/5579/399/7122/10451/4478/58494/1003/7409/83700/5293/3688/83593/3383/653361/5880/4688/5010/3676/5175/4689/3683/3684/4318/7412/4313/3689/6387/1536
hsa00590	Arachidonic acid metabolism	46	-0.640848689148155	-1.58492045255782	0.00101110867829699	0.00341249178925233	0.00175170143827768	2833	tags=35%, list=14%, signal=30%	151056/493869/5322/247/8605/113612/874/5730/2687/27306/26279/5320/2878/6916/240/5740
hsa05166	Human T-cell leukemia virus 1 infection	213	-0.640960898886437	-1.7023938055898	1e-10	1.39859209381212e-09	7.17925766154368e-10	4144	tags=51%, list=20%, signal=41%	5604/8517/4893/4089/4609/5295/83660/2002/1147/4214/958/2033/581/7132/5291/2005/29945/5532/3845/3554/5728/1387/7124/472/2114/9134/9020/4775/5601/4776/112/208/3600/196883/5533/896/5290/4790/894/5530/5925/595/6777/4488/64784/5594/7046/7094/3718/3105/3601/109/996/64764/4772/3716/6776/115/8850/4049/4215/4316/3569/3107/3133/3108/10000/4773/1958/5567/2353/3134/7538/3106/917/5293/1030/2113/1026/3559/7043…
hsa05235	PD-L1 expression and PD-1 checkpoint pathway in cancer	88	-0.643148026453107	-1.6646527971355	8.40588245171449e-06	4.00515575640514e-05	2.05592790614689e-05	4144	tags=61%, list=20%, signal=49%	5604/8517/4893/55509/5295/2475/1147/3458/5335/5291/5532/6300/3845/148022/5728/5603/4775/208/5533/3091/5290/10125/5600/4615/4790/6774/5530/6772/1432/29126/5594/114609/1956/4772/3716/3459/4215/3717/940/5133/7535/10000/4773/2353/919/10538/917/5293/3932/7097/915/920/916/7099
hsa04064	NF-kappa B signaling pathway	102	-0.651974019024618	-1.69234121264407	2.30876091311613e-07	1.46674222715613e-06	7.52908615629203e-07	4696	tags=62%, list=23%, signal=48%	8915/329/2920/331/7188/5971/8517/5743/7187/1147/51135/958/7132/3576/5335/3554/148022/7124/472/330/9020/5336/257397/8737/23586/4615/4790/3654/8740/23118/114609/1540/6357/2919/5579/4049/7185/959/4067/29760/8792/60401/4616/7535/7128/84433/597/4050/3932/3383/3553/6351/695/388372/6363/10673/5328/23643/929/6366/7099/7412/6387
hsa04664	Fc epsilon RI signaling pathway	60	-0.654130567606674	-1.66351301782046	7.78951158253402e-05	0.00033207917799224	0.000170462995850467	4144	tags=58%, list=20%, signal=47%	5604/5170/4893/5295/5335/5291/6300/3845/7124/5603/2885/5578/5601/5336/208/9846/5290/5600/7410/1432/5594/8605/4067/10451/10000/7409/5293/2205/5880/240/2207/695/3635/3937/241
hsa04062	Chemokine signaling pathway	179	-0.654388197437092	-1.73462113949795	1e-10	1.39859209381212e-09	7.17925766154368e-10	4271	tags=59%, list=21%, signal=47%	6369/6368/5604/8517/4893/2829/5295/2771/1147/5829/3576/5335/5291/2788/3845/1399/2885/94235/409/6464/5906/112/5336/208/6375/196883/6376/10344/5290/9564/4790/5908/6774/7410/55970/2185/6772/6777/10235/25759/5594/3579/3718/9844/109/6372/6773/115/2793/6357/3702/2919/6367/5579/3717/4067/2869/6361/146850/2791/6362/1233/408/10451/10000/5567/7409/5293/57580/6846/6347/10663/1236/113/59345/6373/6355/2268/53…
hsa04662	B cell receptor signaling pathway	78	-0.657271524070058	-1.6960921972622	4.04807825814884e-06	2.11544734780682e-05	1.08590214734723e-05	4144	tags=63%, list=20%, signal=50%	5604/8517/4893/5295/1147/5291/5532/3845/2885/4775/5336/208/5533/5290/79168/4790/5530/7410/23547/10990/5594/971/27071/353514/4772/974/11025/25780/5579/11024/4067/29760/11027/10451/10000/4773/2353/84433/7409/5293/5880/10288/118788/2213/695/10859/3635/973/11006
hsa04630	JAK-STAT signaling pathway	130	-0.658786294732994	-1.72945580966252	6.21333874163079e-10	6.94179914582199e-09	3.56336668304053e-09	4080	tags=56%, list=20%, signal=45%	1154/4609/5295/10379/2475/3588/3976/2273/2033/8554/3458/5291/1387/3563/3592/2885/5154/4170/208/3600/9466/896/5290/8835/894/6774/9306/3574/3454/3455/3953/595/6772/6777/3570/6775/9021/53832/3718/3601/5292/1956/3572/8651/6773/3716/6776/3597/3459/2690/3717/3569/5155/10000/9180/3594/5293/316/1026/3559/3566/3586/50615/5008/1441/3575/1438/3561/3560/1439/5159/3587/5156
hsa05164	Influenza A	148	-0.659870406571238	-1.74071469702455	1e-10	1.39859209381212e-09	7.17925766154368e-10	4348	tags=60%, list=21%, signal=48%	8772/79671/9641/5604/8517/5295/10379/4600/7187/1147/51135/29110/2033/5371/581/7132/3458/3576/5291/29108/836/148022/1387/3592/637/7124/578/5578/1021/317/208/55916/23586/896/5290/4615/4790/3454/5611/64135/10241/3455/6772/4938/5594/4940/9021/4599/6773/3716/7098/6041/3459/5579/3717/3569/23430/3606/91543/356/4261/3108/10000/90865/5293/8743/355/4939/6347/3109/114548/834/3383/3123/64499/3553/7177/3115/3…
hsa04613	Neutrophil extracellular trap formation	102	-0.665419492831551	-1.72724188166312	3.88711978263647e-08	2.67963150973238e-07	1.37550935197438e-07	4144	tags=52%, list=20%, signal=42%	5604/1511/5295/2475/10533/5335/5291/6300/10014/5603/1378/5578/5336/208/79792/837/5290/5600/4790/1432/5594/366/3690/5579/2215/10000/7450/6403/5293/718/834/5330/653361/5880/51311/27180/4688/2209/7097/728/4689/3683/3684/64581/51284/6404/2212/2357/7099/3689/2359/2214/1536
hsa04611	Platelet activation	111	-0.667869398217499	-1.73878375308054	2.22440425551309e-09	2.11972640819483e-08	1.08809867607142e-08	3966	tags=55%, list=19%, signal=45%	5295/2771/83660/6786/5584/5291/5028/6300/5603/7408/5906/112/5336/208/6915/196883/10672/5290/10125/5600/9138/5908/2909/3708/10235/1432/5594/7094/8605/109/3709/5023/3690/115/8773/4067/146850/10000/7450/5567/5592/5739/5293/3688/64805/2149/113/4638/5330/5294/23533/6916/2207/695/83706/3937/2212/54518/1278/1277/1281
hsa04650	Natural killer cell mediated cytotoxicity	101	-0.671620335831105	-1.74429474594995	1.0655807028828e-08	8.85251660856483e-08	4.54417681661223e-08	4189	tags=61%, list=20%, signal=49%	369/5604/4893/5295/3458/5335/5291/5532/3845/836/637/7124/259197/2885/5578/6464/5336/6452/5533/5290/5530/7410/3454/3384/3455/2185/25759/3002/5594/51744/4277/3105/100507436/4772/3459/5579/2215/10870/356/3107/3133/7535/10451/4773/919/7409/4068/3106/5551/5293/8743/355/3932/3383/5880/2207/7305/3937/3683/962/3689/2214
hsa04060	Cytokine-cytokine receptor interaction	236	-0.67464259446451	-1.79845469587054	1e-10	1.39859209381212e-09	7.17925766154368e-10	2943	tags=47%, list=14%, signal=41%	6375/3600/9466/6376/10344/970/146433/3574/3454/3556/8740/3455/3953/9235/3570/7046/53832/284340/3579/8764/8784/4982/650/353500/3601/3572/6372/27242/392255/3604/3597/943/6357/2919/3459/6367/4049/654/2690/959/7293/23765/3569/8792/6361/3606/60401/356/6362/1233/1435/8742/90865/9180/4804/3594/8743/608/355/6846/6347/7292/3559/3566/7043/94/10663/4050/3586/1236/944/6373/50615/6355/939/652/3603/7048/729230…
hsa05142	Chagas disease	98	-0.674822428383524	-1.75100795248779	2.11572587926177e-08	1.63213139257336e-07	8.37806237903155e-08	3966	tags=57%, list=19%, signal=46%	5295/2771/1147/51135/7132/3458/3576/5291/2774/6300/148022/3592/7124/5603/5601/208/5290/5600/4615/4790/3654/624/9630/1432/5594/7046/3459/3569/356/10000/2353/10333/919/917/5293/355/6347/7043/3586/718/5330/2769/7048/414062/6348/3553/7097/915/7040/916/6352/5054/712/7099/714/713
hsa05152	Tuberculosis	159	-0.677122481427156	-1.78949749740534	1e-10	1.39859209381212e-09	7.17925766154368e-10	3868	tags=57%, list=19%, signal=46%	3588/3920/51135/2033/581/7132/3458/9114/5532/6300/836/1387/3592/637/7124/5603/1378/317/5601/208/843/5533/5600/4615/4790/3654/1509/5530/3656/6772/1432/5594/817/1263/22925/5878/114609/3716/10312/3459/2215/3717/64127/3569/3606/7421/51806/4261/3108/10000/10333/26253/972/7043/3109/30835/3586/718/8877/11151/3123/9103/3553/3115/3111/4360/9902/7096/3122/2213/2207/3687/2209/7097/3127/3119/7040/1520/3118/4…
hsa05146	Amoebiasis	90	-0.679747238215124	-1.76079852083813	3.78276916199418e-08	2.66438523583938e-07	1.36768312950819e-07	4114	tags=57%, list=20%, signal=46%	7414/1511/5295/81/3458/3576/5291/2774/836/3554/910/3592/7124/5578/3913/5272/5290/87/4790/9630/5878/3908/1284/2919/5579/3569/909/338382/912/5567/1282/911/5293/913/7043/3586/3912/5330/2769/3910/3553/7097/7040/3684/929/1278/7099/3689/1277/1281/2335
hsa05145	Toxoplasmosis	107	-0.681470843094053	-1.77065237695302	1.23412899610489e-09	1.2495556085562e-08	6.41422307186093e-09	4132	tags=60%, list=20%, signal=48%	8517/5170/2771/3588/1147/51135/958/7132/3458/6300/836/3592/7124/5603/3310/330/3913/5601/208/5600/4615/4790/3654/6774/3949/6772/1432/5594/23118/8651/3716/3908/3459/3717/959/146850/3312/4261/3108/10000/3688/7043/3109/3586/3912/3123/5294/23533/3910/240/3115/3111/3122/7097/3127/3119/7040/1234/3118/3113/23643/3117/3587/7099
hsa04933	AGE-RAGE signaling pathway in diabetic complications	99	-0.686442320151464	-1.78198174927545	2.03034248258328e-09	1.99342716471813e-08	1.02326670573575e-08	3675	tags=58%, list=18%, signal=48%	581/183/6401/3576/5335/5291/6300/3845/836/113026/50507/7124/5603/5578/5601/5336/208/5290/5600/4790/6774/595/6772/6777/1432/5594/7046/2308/5292/4772/6776/1284/2152/185/5579/3717/3569/10000/1958/1282/5293/6347/7043/3383/5330/7056/7048/3553/7040/5054/1278/7412/4313/1277/1281/2335/1536
hsa05143	African trypanosomiasis	33	-0.692002399496955	-1.66933821159372	0.000998353721288471	0.00340491163892068	0.00174781039294824	3654	tags=61%, list=18%, signal=50%	3620/6401/3458/3592/7124/5578/4615/5579/3043/3569/3606/356/8542/355/3586/3383/5330/3910/3553/7412
hsa00532	Glycosaminoglycan biosynthesis - chondroitin sulfate / dermatan sulfate	20	-0.699868704658893	-1.61470156040739	0.0082581493659351	0.0218501792929356	0.0112161414174263	3362	tags=65%, list=16%, signal=54%	56548/113189/54480/166012/55790/22856/9469/55454/64131/51363/337876/29940/50515
hsa04620	Toll-like receptor signaling pathway	88	-0.700045198884296	-1.81191910806398	7.42682272195526e-09	6.50348800517164e-08	3.33837266022456e-08	4194	tags=67%, list=20%, signal=54%	9641/5604/8517/5295/7187/1147/51135/29110/958/3576/5291/6300/148022/3592/7124/5603/5601/3663/208/8737/5290/5600/4615/4790/3654/3454/3455/6772/1432/5594/23118/114609/941/7098/7100/3569/10000/2353/10333/5293/6373/414062/6348/3553/51311/6696/3627/7096/6351/388372/7097/6352/942/51284/23643/929/7099/1513/4283
hsa04974	Protein digestion and absorption	84	-0.701740132574724	-1.81250786675974	3.43811594308788e-09	3.1827130444585e-08	1.63375133536206e-08	1159	tags=29%, list=6%, signal=27%	206358/4311/1282/1803/50509/1359/7373/1306/1303/1296/2006/9056/1291/1292/1307/1278/1293/1290/1277/1289/1301/1295/1281/1300
hsa04612	Antigen processing and presentation	61	-0.712401571835639	-1.81466100175512	3.29955841418067e-07	1.9797350485084e-06	1.01623826401666e-06	2215	tags=48%, list=11%, signal=43%	10437/1508/3105/1514/3312/6890/5641/3107/4261/3133/3108/3134/3106/972/926/3109/567/3123/3115/3111/925/3122/3127/3119/1520/3118/920/3113/3117
hsa04380	Osteoclast differentiation	124	-0.718381039068721	-1.88323923431055	1e-10	1.39859209381212e-09	7.17925766154368e-10	3653	tags=71%, list=18%, signal=59%	5604/8517/5295/10379/1147/7132/3458/5291/5532/6300/3554/7124/5603/2885/9020/5601/5336/208/5533/9846/5290/5600/79168/4790/5530/3454/23547/3726/2355/3455/10326/6772/10990/1432/2274/5594/7046/9021/23118/4982/353514/8651/6773/4286/4772/3716/3690/1540/11025/3459/2215/54/11024/5468/29760/8792/11027/10000/4773/2354/2353/55423/1435/5293/3932/653361/7048/9103/126014/3553/140885/4688/10288/2213/695/2209/10…
hsa04061	Viral protein interaction with cytokine and cytokine receptor	90	-0.721008154626265	-1.86767966209282	1e-10	1.39859209381212e-09	7.17925766154368e-10	2147	tags=52%, list=10%, signal=47%	3570/53832/3579/8764/3572/6372/6357/2919/6367/4049/3569/6361/3606/6362/1233/1435/8743/6846/6347/3559/3586/1236/6373/6355/729230/414062/6348/3627/6351/388372/2833/6363/7133/10563/1234/3561/6352/3560/1230/6356/1524/6366/3587/9547/6387/4283/1436
hsa05133	Pertussis	72	-0.721578202997972	-1.85098068849885	7.31227380930235e-09	6.50348800517164e-08	3.33837266022456e-08	3903	tags=64%, list=19%, signal=52%	2771/51135/3576/29108/6300/836/148022/3592/7124/5603/10392/5601/5600/4615/4790/3654/840/3659/1432/5594/717/114609/6372/721/3569/51806/2353/3688/720/715/3586/718/114548/834/3678/3553/716/3394/3684/23643/929/712/7099/3689/714/713
hsa04659	Th17 cell differentiation	98	-0.723050217111675	-1.87614789751923	1e-10	1.39859209381212e-09	7.17925766154368e-10	4012	tags=72%, list=20%, signal=59%	4089/2475/1147/6095/3458/5335/5532/6300/3554/5603/4775/5601/5533/9466/3091/5600/4790/6774/5530/3556/6772/6777/3570/1432/5594/7046/3718/30009/6256/3572/4772/196/3716/6776/3459/3717/3569/2625/7535/3108/4773/2353/50943/919/3594/917/3559/3566/3109/3932/3662/50615/3123/7048/3553/861/3115/3111/3122/915/3127/10148/3119/7040/3118/3561/920/916/3560/3113/3117
hsa00603	Glycosphingolipid biosynthesis - globo and isoglobo series	14	-0.726680725185498	-1.57147118173268	0.0158496365050153	0.037759428144301	0.019382682413254	3178	tags=64%, list=15%, signal=54%	6483/6489/8706/3073/53947/3074/4668/6482/26301
hsa04514	Cell adhesion molecules	132	-0.728532235396632	-1.91327651235325	1e-10	1.39859209381212e-09	7.17925766154368e-10	2488	tags=54%, list=12%, signal=48%	3384/8506/5817/23114/94030/29126/214/4267/3105/941/201633/80381/90952/3695/965/8516/57502/959/940/947/3385/1493/7122/5133/3107/923/3133/29851/3108/58494/3680/3134/1003/6403/3106/83700/6383/3688/3685/926/3109/6693/3383/3123/6382/6402/5010/3115/3111/925/3122/3676/80380/5175/1272/3127/3119/3118/920/3683/3684/942/3113/6404/6614/3117/914/5788/7412/3689/1462
hsa04145	Phagosome	142	-0.729417481742922	-1.91898278302087	1e-10	1.39859209381212e-09	7.17925766154368e-10	1947	tags=45%, list=9%, signal=41%	7037/22925/3105/5878/1783/3690/10312/23673/526/3693/2215/1514/84617/6890/338382/3107/3133/3108/3134/8685/10333/3106/3688/3685/3109/715/30835/718/948/11151/653361/3123/9103/3678/4688/3115/3111/4360/9902/3122/2213/2209/7097/81035/3127/3119/1520/4689/3118/3684/3113/4481/64581/7057/2212/929/4973/3117/7099/3689/2214/1311/1536/7058
hsa04658	Th1 and Th2 cell differentiation	84	-0.729740612131575	-1.88482963818761	1e-10	1.39859209381212e-09	7.17925766154368e-10	3891	tags=71%, list=19%, signal=58%	3516/1147/3458/5335/5532/6300/9794/3592/5603/54567/4775/5601/182/5533/5600/4790/5530/6772/6777/1432/6775/5594/3718/30009/4772/3716/6776/84441/4853/3459/4851/3717/2625/7535/3108/4773/2353/919/864/3594/917/3559/3566/3109/3932/3123/3115/3111/3122/915/3127/4094/3119/3118/3561/920/916/3560/3113/3117
hsa04512	ECM-receptor interaction	80	-0.743192485368189	-1.92058227673229	1e-10	1.39859209381212e-09	7.17925766154368e-10	1945	tags=45%, list=9%, signal=41%	1101/3381/3690/3908/3695/1284/3694/3693/8516/7148/3672/7450/3371/3680/1282/3688/960/3685/3339/948/3912/6382/3910/3678/6696/1291/3676/1292/7057/1278/1293/22801/1277/1311/2335/7058
hsa05140	Leishmaniasis	72	-0.747588057224783	-1.91770074418301	1.60008373096853e-10	1.92010047716224e-09	9.85626625703812e-10	2671	tags=67%, list=13%, signal=58%	3592/7124/5603/1378/5600/4615/4790/3654/6772/1432/5594/23118/3716/3459/5579/2215/3717/3108/2353/3688/7043/3109/3586/718/653361/3123/9103/3553/4688/3115/3111/3122/3676/2209/7097/3127/3119/7040/4689/3118/3684/3113/2212/3117/7099/3689/2214/1536
hsa05416	Viral myocarditis	55	-0.753413353406814	-1.9012873768994	3.51181729841132e-08	2.52850845485615e-07	1.2979348143836e-07	1883	tags=53%, list=9%, signal=48%	3105/941/6443/3908/959/940/857/3107/3133/3108/3134/6444/3106/5551/3109/3383/3123/5880/3115/3111/3122/3127/3119/3118/3683/942/3113/3117/3689
hsa05321	Inflammatory bowel disease	53	-0.757351555633553	-1.90325872363888	3.25765773412925e-08	2.39882069513154e-07	1.23136344974263e-07	2594	tags=66%, list=13%, signal=58%	4790/6774/6772/6775/30009/4772/7100/3459/64127/3569/3606/2625/3108/50943/3594/3566/7043/3109/3586/50615/3123/3553/3115/3111/3122/7097/3127/4094/3119/7040/3118/3561/3113/3117/7099
hsa05323	Rheumatoid arthritis	85	-0.762037769909954	-1.9691115693063	1e-10	1.39859209381212e-09	7.17925766154368e-10	1816	tags=52%, list=9%, signal=47%	941/6372/284/7010/10312/526/2919/54/1514/940/3569/8792/3606/1493/3108/2353/1435/6347/7043/3109/4050/3383/3123/414062/6348/3553/3115/3111/3122/7097/3127/3119/7040/3118/10673/6352/3683/942/3113/3117/7099/3689/6387/1513
hsa04610	Complement and coagulation cascades	68	-0.765677536511866	-1.96008016214902	1e-10	1.39859209381212e-09	7.17925766154368e-10	1876	tags=49%, list=9%, signal=44%	717/7035/5345/5327/2152/721/10544/7450/5627/720/5329/715/2149/718/7056/2/5265/3687/3075/728/1675/730/716/3684/5328/5054/712/3689/11326/714/713/719/2162
hsa04640	Hematopoietic cell lineage	85	-0.773809405094975	-1.99952956687513	1e-10	1.39859209381212e-09	7.17925766154368e-10	2186	tags=61%, list=11%, signal=55%	931/3570/7037/3690/3815/3569/909/947/912/3108/4311/3672/1435/911/917/960/913/952/924/926/290/3559/945/3566/3109/921/948/3123/3678/3553/3115/3111/925/3122/3676/2209/1441/3575/915/3127/3119/1438/3118/920/951/916/3684/3113/929/3117/914/1436
hsa05340	Primary immunodeficiency	32	-0.778896418356302	-1.87426137087757	6.89829313914311e-06	3.4922609016912e-05	1.79264854602732e-05	1384	tags=56%, list=7%, signal=53%	3718/959/29760/6890/4261/29851/7535/926/3932/925/695/3575/915/3561/920/916/973/5788
hsa05322	Systemic lupus erythematosus	46	-0.81438187946858	-2.01409555612562	1.17680472234577e-10	1.52513892016012e-09	7.82884825813187e-10	1876	tags=65%, list=9%, signal=59%	717/941/721/2215/959/940/3108/720/3109/715/3586/718/3123/3115/3111/3122/2209/3127/3119/730/3118/716/942/3113/2212/3117/712/714/713/2214
hsa05144	Malaria	46	-0.81558142151558	-2.01706221386587	1.03599414356453e-10	1.39859209381212e-09	7.17925766154368e-10	1384	tags=61%, list=7%, signal=57%	959/3043/3569/3606/2532/6403/3820/6383/6347/3082/7043/3586/948/3383/6382/3553/2995/4035/7097/5175/7040/3683/7057/7099/7412/3689/1311/7058
hsa04940	Type I diabetes mellitus	37	-0.816801263155974	-1.98756070426415	1.37541689232078e-08	1.11408768277983e-07	5.71883865754429e-08	2364	tags=73%, list=12%, signal=65%	5799/1363/3002/3105/941/4049/940/356/3107/3133/3108/3134/3106/5551/355/3109/3123/3553/3115/3111/3122/3127/3119/3118/942/3113/3117
hsa04672	Intestinal immune network for IgA production	39	-0.830650627213044	-2.03164275366808	7.49361727537734e-10	8.09310665740753e-09	4.1543562438934e-09	1852	tags=64%, list=9%, signal=58%	3601/941/3695/959/940/3569/29851/3108/608/3109/3586/3123/3115/3111/3122/3676/3127/3119/7040/3118/10673/942/3113/3117/6387
hsa05330	Allograft rejection	31	-0.838350544379351	-2.01153602520124	1.44067471247969e-08	1.13848440693517e-07	5.84407200441057e-08	2099	tags=81%, list=10%, signal=73%	3002/3105/941/959/940/356/3107/3133/3108/3134/3106/5551/355/3109/3586/3123/3115/3111/3122/3127/3119/3118/942/3113/3117
hsa05332	Graft-versus-host disease	32	-0.838742133992394	-2.01826834072081	1.04848217916458e-08	8.85251660856483e-08	4.54417681661223e-08	2099	tags=78%, list=10%, signal=70%	3002/3105/941/940/3569/356/3107/3133/3108/3134/3106/5551/355/3109/3123/3553/3115/3111/3122/3127/3119/3118/942/3113/3117
hsa05150	Staphylococcus aureus infection	61	-0.846889396056911	-2.15723437536012	1e-10	1.39859209381212e-09	7.17925766154368e-10	1436	tags=67%, list=7%, signal=63%	721/2215/3866/25984/3108/6403/720/3109/715/3586/5724/718/3383/3123/9103/3115/3111/3122/2213/2209/3075/728/1675/3127/3119/3118/716/3683/3684/3113/6404/2212/2357/3117/712/3689/2359/714/713/719/2214
hsa05320	Autoimmune thyroid disease	32	-0.871845858454738	-2.09792595697084	1e-10	1.39859209381212e-09	7.17925766154368e-10	2099	tags=81%, list=10%, signal=73%	3002/3105/941/959/940/356/1493/3107/3133/3108/3134/3106/5551/355/3109/3586/3123/3115/3111/3122/3127/3119/3118/942/3113/3117
hsa05310	Asthma	21	-0.882816790689609	-2.05787353850279	4.68999184995677e-08	3.16574449872082e-07	1.62504103573064e-07	1384	tags=76%, list=7%, signal=71%	959/3108/3109/3586/2205/3123/3115/3111/3122/2207/3127/3119/3118/6356/3113/3117
