# Supplementary material for: Identifying the Role of Oxidative Stress-Related Genes as Prognostic Biomarkers and Predicting the Response of Immunotherapy and Chemotherapy in Ovarian Cancer
Source: Oxid Med Cell Longev. 2022 Dec 12;2022:6575534. doi: 10.1155/2022/6575534 (PMC9764017; doi:10.1155/2022/6575534)
Supplement: Supplementary 10 — Supplement Table 9: signaling pathway analysis in regard to IL18BP. [file 6575534.f10.txt]

ID	Description	setSize	enrichmentScore	NES	pvalue	p.adjust	qvalues	rank	leading_edge	core_enrichment
hsa00040	Pentose and glucuronate interconversions	16	0.567248881057769	1.69152734857878	0.0161750900082843	0.04722548600633	0.0278199386420679	1078	tags=19%, list=5%, signal=18%	7367/27294/7364
hsa00190	Oxidative phosphorylation	103	0.450871852293773	2.0417012901838	1.54832268951557e-06	8.03653205510465e-06	4.73421975240351e-06	4144	tags=49%, list=20%, signal=39%	56901/4713/51079/1350/1329/4697/1339/1340/4725/9167/4696/1337/4714/1327/126328/4704/4709/84701/4710/55967/29796/1347/4708/525/4711/155066/534/1353/4707/4726/4698/1349/7386/90423/4695/1351/4717/4694/4716/10975/7381/27068/6391/496/4722/6390/9377/9296/4729/4706
hsa04260	Cardiac muscle contraction	71	0.359851884660172	1.5508854349186	0.00806605708708476	0.0261148580938289	0.0153839337877698	3471	tags=35%, list=17%, signal=29%	7134/7139/482/1350/477/1329/59285/1339/1340/9167/1337/1327/84701/29796/1347/10345/70/7137/4634/1349/7386/1351/10975/3270/7381
hsa03040	Spliceosome	137	0.349766852738566	1.64567776792464	3.16267446997329e-05	0.000129274318960158	7.61538721059358e-05	4073	tags=33%, list=20%, signal=27%	26863/26864/26834/6635/26835/6633/6636/6637/25804/51639/23658/57819/6629/26870/27316/8896/6631/51690/26831/151903/6628/6431/3178/10907/83443/27258/10465/55110/10713/6100/8683/9939/56259/22916/6632/101954271/6626/25949/9410/11017/4116/3183/101954268/10189/51340
hsa04014	Ras signaling pathway	209	-0.442389030739928	-1.28661057567952	0.015802290147311	0.0465526925961323	0.0274236045230717	5658	tags=44%, list=28%, signal=32%	5567/5966/8036/27/6789/80310/7010/5601/7074/4763/25/382/5922/2002/285/387/3363/1942/1950/10000/5878/5900/10928/5595/11186/2246/56034/3643/3551/5899/5906/1946/2788/5604/10235/5291/29110/4303/5058/5336/7422/5594/55770/8517/1956/5970/5156/5290/6464/5869/6654/9771/207/5337/5924/5155/2114/22808/2885/2323/9610/5320/23179/5578/2321/115727/2252/3791/22821/8605/2793/2324/10125/83593/4790/25780/5293/54331/…
hsa05171	Coronavirus disease - COVID-19	199	-0.446012157494343	-1.29407345011925	0.0152003167004877	0.0451863960096316	0.0266187364228636	1962	tags=30%, list=10%, signal=28%	2353/5610/6774/59272/5578/5600/4312/103/3576/8829/3716/3654/4790/5293/8503/10379/5579/4792/114548/4615/1839/3569/9641/3570/2162/6773/51311/1675/7098/720/4600/728/7099/51284/721/715/9636/3553/23586/7097/6772/64135/7124/629/6347/4938/716/2212/717/834/719/718/4940/4599/712/714/713/1536/4939/3627
hsa05206	MicroRNAs in cancer	189	-0.455254360847002	-1.32110266154355	0.0105579012482317	0.0322657355903902	0.0190073382038996	5673	tags=48%, list=28%, signal=35%	63923/1870/407032/1789/406992/6093/599/7157/23414/25/1871/4363/407018/387/407040/27086/5743/406886/2475/2033/7431/324/1942/472/57521/898/1591/9134/5243/5595/11186/442891/406913/7148/3551/1786/4609/442903/1946/5604/836/8434/4855/6935/5291/407010/5336/7422/5594/4853/1956/4851/5156/7078/5290/6464/6654/7168/5292/407007/5155/4170/578/4082/2885/2065/406903/407006/54541/6768/6774/3690/5578/1029/1545/479…
hsa04010	MAPK signaling pathway	275	-0.476725961809358	-1.39908384534434	0.000325821097939234	0.00123887789565267	0.000729807355237207	5468	tags=48%, list=27%, signal=36%	6789/80310/1848/7010/6788/5601/7157/2069/781/4763/3556/5922/2002/285/468/7786/23118/5606/7132/6195/1942/778/1950/10000/5871/6722/7043/5595/2768/1432/2246/56034/2005/4214/3643/409/3551/4609/5906/1844/2317/1946/51135/4149/369/5604/836/9693/1326/10235/3164/9344/5058/1849/5533/7189/7422/5594/1846/8517/1956/5970/5156/374/8912/6654/9020/6196/7186/3312/207/5603/5924/5155/6197/93589/22808/8717/4296/2885/…
hsa05200	Pathways in cancer	485	-0.48134621294932	-1.42699953038131	1.03532174630377e-06	5.4604872748602e-06	3.21670423724261e-06	4161	tags=38%, list=20%, signal=31%	7043/7849/4041/5900/10928/5595/2768/3913/11186/4087/2246/3714/867/3551/51561/5899/4609/7855/8031/3728/10672/613/2788/4286/3592/4149/5914/3909/4088/369/3688/5604/836/5747/8772/3454/10235/331/3460/624/4855/6932/5291/23365/6667/54567/5979/5336/2944/7189/7422/2099/5594/5468/4853/3673/1902/8517/1956/5970/841/4851/5156/5290/5331/1906/2767/1613/6778/6654/8321/8202/2308/1643/5292/7704/1050/896/3572/7186/…
hsa04015	Rap1 signaling pathway	196	-0.489082347898675	-1.41873901396926	0.00117126475358262	0.00411831800453245	0.00242604923492496	4095	tags=38%, list=20%, signal=31%	5900/5595/1432/2246/5587/56034/3643/5899/5906/26037/1946/3688/5604/9693/10235/5291/23094/9564/260425/10636/60/7422/5594/5584/1902/1956/5156/5290/5331/25865/9771/207/5603/5155/22808/1500/51466/109/115/2771/3690/6494/5578/2321/5600/2149/2252/2889/3791/2324/83593/10411/25780/5293/8503/196883/5579/7094/5159/113/57121/7057/10451/5330/51806/2357/7409/3684/5880/54518/1435/3937/1436/3683/3689
hsa04931	Insulin resistance	98	-0.500670198989857	-1.41593946079864	0.0099283868605763	0.0309198333657948	0.0182144841652678	5634	tags=53%, list=27%, signal=39%	22877/4846/2997/5601/5588/5170/6199/10488/2475/28965/11001/7132/6195/5562/10000/5499/5837/1374/3643/3551/64764/5580/5465/5291/133522/8473/10999/5970/5290/1375/2308/10062/6196/5792/207/948/5105/6197/5770/90993/5106/6774/4790/5293/8503/5579/9021/4792/9945/6720/3569/7124
hsa04151	PI3K-Akt signaling pathway	311	-0.505445114191158	-1.48588275309557	8.82269380437027e-06	4.02427796076292e-05	2.37065143029008e-05	4442	tags=42%, list=22%, signal=34%	3912/1942/5562/1950/57521/10000/898/9134/3696/5595/3913/1388/2246/56034/7148/3643/3551/6794/7534/4609/8115/1946/7450/2788/3909/64764/3688/5604/5747/930/3454/3164/23035/5291/7422/5594/5934/3693/3673/1902/8517/1956/5970/5156/5290/374/131873/6654/5519/896/1284/207/5155/5105/4170/3455/90993/3672/5106/2885/2065/3675/2323/3563/54541/3691/3685/3690/5578/2321/2149/5526/3918/2252/1282/3680/3791/3574/3716/…
hsa05165	Human papillomavirus infection	304	-0.50614359598451	-1.48711902778692	1.14625066712327e-05	5.13457490615492e-05	3.02471336818397e-05	3482	tags=35%, list=17%, signal=29%	3909/64764/3688/5604/836/5747/8772/3454/23352/4855/6932/5291/29110/7422/5594/4853/5934/3693/5584/3673/8517/1956/5970/841/4851/9114/5290/131873/6654/8321/5519/2308/896/1284/23513/207/526/8717/537/4799/3455/578/8322/7187/528/90993/3672/2885/3675/3691/5610/84441/3685/3690/5526/3918/1282/3680/3716/4790/1026/1311/4242/5293/8503/355/10379/5734/1291/5159/3910/148022/3381/1292/1278/9641/6773/7057/1293/31…
hsa04722	Neurotrophin signaling pathway	115	-0.508719995742657	-1.45047592333861	0.00353517010089444	0.0119175321957988	0.00702046802456518	5318	tags=45%, list=26%, signal=34%	5663/5601/7157/814/25/5170/468/387/817/6195/10000/5595/1432/4214/3551/5906/51135/5604/5580/5291/396/5336/7189/5594/5970/5290/6464/6654/6272/6196/207/5603/6197/2885/4215/4145/11213/4217/5600/2889/4794/3654/4790/5293/8503/4792/8767/356/10019/3656/51806/397
hsa04012	ErbB signaling pathway	82	-0.510883510954158	-1.42723390984615	0.014668872201942	0.044006616605826	0.0259237432443784	6184	tags=54%, list=30%, signal=38%	3725/2549/6198/6777/818/27/9542/5601/2069/25/2002/6199/2475/817/1950/10000/5595/867/4609/369/5604/5747/4690/868/5291/5058/5336/5594/1956/5290/6464/374/6654/207/2885/2065/5578/6776/1026/5293/8503/685/5579/1839
hsa05132	Salmonella infection	244	-0.51797436446321	-1.51576629351341	1.32686992351561e-05	5.86333060796764e-05	3.45401416789982e-05	4390	tags=41%, list=21%, signal=33%	10000/23339/10096/55207/4646/5878/5595/1432/5287/4074/3551/257397/4609/7277/2317/51135/23265/114609/5604/836/8772/257364/6932/5291/84617/5058/23191/7189/60/5594/64837/51429/55770/29109/1783/8517/5970/841/5290/1778/57617/5869/57381/7186/838/207/5603/6990/7100/8717/9842/578/8737/8797/10095/9367/10392/2353/79443/5600/391/58484/83547/338382/3576/3654/4790/9267/5293/79026/840/9844/10333/113146/4792/36…
hsa04070	Phosphatidylinositol signaling system	89	-0.518874240856722	-1.46231921834855	0.00816740993887513	0.0261837553922761	0.0154245203179995	4301	tags=39%, list=21%, signal=31%	113026/3612/3628/22876/5287/8871/55300/4952/8867/1609/79837/1606/55361/64768/8776/5291/5336/5290/5331/3707/8821/5297/8525/4534/5578/23396/3710/3636/5305/5293/8503/5579/5330/51806/3635
hsa04144	Endocytosis	239	-0.520272359216169	-1.52215023668907	2.30382203017518e-05	9.65833081881134e-05	5.68960096520996e-05	5817	tags=45%, list=28%, signal=32%	163/81873/10015/29924/161/8411/1212/23550/57132/829/60682/6642/84364/64145/382/1213/387/7879/1785/26119/51510/89853/8853/64750/116983/10096/6455/1173/5878/2348/10565/1759/273/4087/147179/23624/9146/409/867/56904/26286/112936/4088/80223/2060/6643/30845/868/57154/11059/9525/51100/9922/3579/377/8729/7189/2869/5584/50807/1956/5156/26056/5869/7037/9815/23096/55048/11021/3312/5337/4734/30011/10938/3482…
hsa04935	Growth hormone synthesis, secretion and action	104	-0.52297074545916	-1.4847928436123	0.00461941782818867	0.01522924228295	0.0089713547007238	5271	tags=50%, list=26%, signal=37%	5601/2773/468/10488/2475/2033/5606/3709/778/51738/10000/5595/1432/1388/4214/3486/64764/5604/5747/5291/9564/5336/5594/5290/6464/5331/2767/6654/207/5603/90993/3726/2885/109/2353/6774/115/2771/5578/5600/3710/6776/5293/8503/196883/5579/9021/113/3717/8651/5330/6772
hsa04915	Estrogen signaling pathway	112	-0.525335393672262	-1.49471927559801	0.0029050890265714	0.00999962222830366	0.00589065143338023	3484	tags=37%, list=17%, signal=31%	5914/64764/5604/5580/5291/6667/2099/5594/1956/5290/6464/5331/6654/8202/10499/3312/207/90993/9568/2885/109/2353/115/2771/3710/3861/5293/8503/196883/1509/3310/3868/113/1839/3303/25984/4313/5330/2289/51806/4318
hsa05220	Chronic myeloid leukemia	76	-0.530424103712583	-1.47702251059668	0.00886853551287008	0.0281554476961992	0.0165860194057764	4390	tags=53%, list=21%, signal=42%	6777/1869/1647/1870/7157/25/1871/10000/7043/5595/867/3551/4609/613/4088/369/5604/5291/5594/8517/5970/5290/6464/6654/1643/207/578/2885/1029/7048/6776/4790/1026/5293/8503/4792/4616/861/9846/7040
hsa05418	Fluid shear stress and atherosclerosis	134	-0.533614018550306	-1.53298423610546	0.000549899632081415	0.00202041774933284	0.00119020263360022	2971	tags=43%, list=14%, signal=37%	7132/6385/5562/445/59341/10000/6382/1432/6401/3551/90/5747/5291/2944/60/7422/4205/8517/5970/5290/1535/1906/207/5603/5155/1843/2353/4208/1003/3685/8878/4217/3690/1728/5600/3791/4790/5293/8503/3554/3458/7056/1514/10365/4313/5175/3162/51806/3553/4688/653361/3383/7412/7124/6347/5880/4318
hsa04068	FoxO signaling pathway	123	-0.534984904455801	-1.52645784447858	0.00103197114198131	0.00366798438508573	0.00216076337508672	4439	tags=41%, list=22%, signal=33%	472/5562/1950/10000/7043/5347/5595/1432/3643/3551/6794/4088/369/5604/5291/4303/5594/5934/1956/5290/6654/2308/207/5603/5105/604/80854/5106/2885/6774/5600/1901/7048/116986/6446/1026/5293/8503/1263/3586/4616/1030/3569/10365/356/7040/6648/114907/8698/3575/8743
hsa05205	Proteoglycans in cancer	191	-0.537020571993582	-1.55782002064648	1.66488019026624e-05	7.16336608180343e-05	4.21984868169975e-05	4561	tags=46%, list=22%, signal=36%	817/3709/6385/10000/5499/29102/6382/5595/1432/54776/4087/867/4609/4660/7855/2317/369/3688/5777/5604/836/5747/1655/5291/23365/5058/5336/60/7422/2099/5594/3693/3673/1956/7078/5290/6654/8321/207/5603/3339/22808/8322/2885/2065/406903/2017/6548/3685/6774/3690/5578/7291/5600/117581/3791/3710/8826/1026/5293/8503/355/5579/1634/2316/1514/1839/1278/5329/7057/4313/10451/3678/10855/356/7040/4478/7099/4060/12…
hsa04929	GnRH secretion	58	-0.537633731007887	-1.45963596604377	0.0173050264244712	0.0497422178680243	0.0293025136644083	4551	tags=41%, list=22%, signal=32%	3709/778/10000/5595/409/3762/5604/5291/610/5594/5290/5331/2767/8912/207/9568/5578/3710/5293/408/8503/5579/5330/6696
hsa04810	Regulation of actin cytoskeleton	199	-0.537858877396788	-1.56056036019367	7.44820613069153e-06	3.47937629248018e-05	2.04965672468654e-05	4489	tags=45%, list=22%, signal=35%	1730/1950/1072/10096/5499/3696/5595/2768/54776/2246/56034/85464/54434/3681/4660/10672/7114/369/3688/79837/5604/85477/5747/624/5291/23365/54961/128239/5058/9564/23191/60/5594/221178/3693/3673/1902/1956/5156/5290/6654/79784/87/4629/3984/5155/22808/3672/10095/3675/3691/6548/7414/1729/3985/3685/2934/89846/3690/23396/2149/2252/7852/3680/4638/8826/5305/5293/8503/5159/4627/6387/57121/10451/3676/9459/367…
hsa04072	Phospholipase D signaling pathway	133	-0.538477055152737	-1.54617018475973	0.000402348552540506	0.00151227559403156	0.000890862493828344	4095	tags=42%, list=20%, signal=34%	5900/5595/2768/1759/56034/3643/5899/10672/1609/5604/1606/5291/5336/3579/5594/1902/1956/5156/2205/5290/6464/5331/6654/207/5337/5155/22808/8525/552/2885/109/115/5578/23396/2149/3576/8605/56894/10161/10411/146850/9267/5293/8503/196883/5159/113/2185/9846/57121/5294/23533/5330/8877/27128/2207
hsa04510	Focal adhesion	192	-0.542108312594684	-1.57297589524105	5.92230606707678e-06	2.84793247637369e-05	1.67768113045673e-05	4442	tags=46%, list=22%, signal=36%	3912/1950/10000/3611/5499/3696/5595/3913/54776/56034/7148/5906/4660/2317/7450/3909/3688/5604/5747/331/5291/5058/9564/60/7422/5594/3693/3673/1956/5156/5290/6464/131873/6654/87/7791/896/1284/207/29780/5155/3672/2885/3675/3691/7414/1729/3685/3690/5578/23396/2321/3918/2889/1282/3680/3791/4638/2324/1311/5293/8503/1291/5579/7094/5159/3910/3381/1292/2316/1278/64098/7057/1293/10451/3676/3678/3695/3694/33…
hsa05168	Herpes simplex virus 1 infection	462	-0.542751308986272	-1.60687672296227	1e-10	8.60526315789474e-10	5.06925207756233e-10	3585	tags=23%, list=17%, signal=19%	51135/5199/80778/121274/7592/3592/836/8772/3454/3460/79891/5291/29110/9831/64170/7189/340385/6041/346171/8517/5970/284371/841/58500/5290/2923/10308/7186/3054/207/8717/3455/578/7187/5610/5452/3690/3459/139735/3716/3654/4790/5293/286075/6672/8503/355/10379/9021/4792/3458/148022/90649/4615/3569/9641/25833/3717/6773/5371/3135/7098/3678/8740/29992/356/6892/4049/8764/3112/3553/3665/23586/3109/7097/6891…
hsa05130	Pathogenic Escherichia coli infection	184	-0.542889725814093	-1.57533446769884	3.00877933930676e-05	0.000124540613158647	7.33653056753014e-05	4087	tags=44%, list=20%, signal=36%	5595/2768/1432/147179/3551/257397/7277/137075/51135/10672/114609/3688/5777/836/8772/4690/4645/23365/84617/5058/23191/7189/60/5594/10802/4642/1902/55930/8517/5970/841/79784/7186/4629/5603/7100/8717/578/8737/8797/10095/2017/4643/2353/9871/9632/5600/2149/10686/3576/3654/4790/4641/9267/355/840/3554/4792/3606/837/4644/29108/9071/114548/4627/4615/3569/57121/64005/356/7456/7099/3059/4542/3553/27128/3071…
hsa04218	Cellular senescence	152	-0.544578868535712	-1.5680640107182	9.47613061289309e-05	0.000377889598831224	0.000222610000277206	5902	tags=54%, list=29%, signal=39%	3552/890/292/1869/6237/1647/1870/132660/7248/4775/7157/545/28996/5933/1871/204851/5883/678/2475/5606/3709/5481/4776/472/59341/10000/898/5499/9134/7043/5595/1432/4087/90550/3364/7416/3486/4609/4088/5604/10111/5291/4683/10114/5533/5594/5934/5970/5290/2308/896/823/207/5603/4773/22808/8878/5600/1029/3576/7048/3710/83593/4790/1026/5293/8503/4772/4616/3805/1030/3569/2113/3135/7040/51806/3133/5054/3105/…
hsa05131	Shigellosis	215	-0.544724258815349	-1.58579424546343	2.70536287391821e-06	1.36100563041731e-05	8.01751264659161e-06	5271	tags=49%, list=26%, signal=37%	5601/3456/92610/7157/9181/382/5588/83660/10627/387/6199/2475/81/23118/3709/7132/8915/25851/5481/472/57521/10000/3611/81858/10096/113026/5595/1432/8678/7316/7416/3551/257397/3098/10892/3688/5580/5747/831/5291/29110/10670/4303/9564/5336/7189/60/5594/55072/55062/8517/1956/5970/5290/5331/87/2308/7186/823/207/5603/7100/10318/10616/8717/8737/10095/2017/10392/7414/1729/8878/10241/23048/5600/58484/3576/3…
hsa05212	Pancreatic cancer	76	-0.550227727829153	-1.53216781490475	0.00376078093504312	0.0125487282220316	0.00739229764890322	5271	tags=58%, list=26%, signal=43%	1869/1647/1870/5601/7157/1871/6199/2475/1950/10000/7043/5900/10928/5595/4087/3551/5899/4088/369/5604/5291/7422/5594/8517/1956/5970/5290/1643/207/5337/578/6774/1029/7048/3716/4790/1026/5293/8503/4616/9459/7040/6772/5880
hsa05120	Epithelial cell signaling in Helicobacter pylori infection	68	-0.550770188477172	-1.52611531055581	0.0101652674599469	0.03135889112644	0.0184731275587913	4081	tags=51%, list=20%, signal=41%	7082/529/5601/245972/6868/83700/1445/102/1432/3551/836/5058/5336/3579/2921/8517/1956/5970/9114/9020/5603/526/537/528/10392/5600/3576/4790/2920/4792/2919/1839/4067/10312/6352
hsa04926	Relaxin signaling pathway	121	-0.558195845265086	-1.5918687000112	0.000163580783013373	0.000644468868016542	0.000379648488160397	4087	tags=43%, list=20%, signal=35%	5595/1432/1388/4087/409/2788/64764/5604/5291/7422/5594/1956/5970/5290/6464/5331/1906/6654/1284/207/5603/90993/2885/109/2353/115/2771/5578/5600/1282/4312/7048/2793/4790/5293/408/54331/8503/196883/4792/113/1278/4313/59/5330/59345/1281/4322/7040/1277/2769/4318
hsa04928	Parathyroid hormone synthesis, secretion and action	97	-0.559104748038385	-1.58027755527507	0.000804293641535115	0.00289015407452728	0.00170255334182679	5252	tags=58%, list=26%, signal=43%	2773/9138/468/387/10488/3709/9826/4324/1591/5744/4041/5595/2768/1388/409/1594/10672/64764/5141/369/5604/6667/4205/5594/4929/1956/4209/5331/2767/5337/860/90993/11214/109/2353/4208/115/2771/5578/64386/3710/1026/408/196883/5579/4323/1958/113/1839/9935/2625/5142/5330/4322/10568/7421
hsa05203	Viral carcinogenesis	161	-0.560008106550771	-1.61516310176904	7.03760688316478e-06	3.33521369680418e-05	1.96473235639841e-05	3476	tags=49%, list=17%, signal=41%	5315/1232/245972/7157/5922/5933/468/387/10488/1642/2033/81/898/9134/6722/5595/1388/7534/8379/64764/85477/836/23352/5291/83933/9734/1654/1960/5594/5934/8517/5970/841/9114/5290/87/51564/896/3572/7186/23513/8717/578/7187/90993/2885/5610/6774/2934/1029/8850/5366/1237/4791/3716/6776/4790/1026/5293/7533/6672/8503/10379/4792/1233/1030/1959/7185/3718/3135/4067/3665/3133/3105/1234/3107/718/3106/3134
hsa04071	Sphingolipid signaling pathway	115	-0.560541677797284	-1.59823127550914	0.000166203677157448	0.000647007171791492	0.000381143770924974	5498	tags=53%, list=27%, signal=39%	4846/8560/6093/28227/5601/2773/7157/55304/5170/4363/387/7132/10000/1903/5595/2768/1432/10672/5604/8439/10558/8879/624/5291/5594/5970/2205/5290/5331/5519/259230/7186/207/5603/5337/9517/8717/6609/166929/2771/4217/5578/5600/5526/1901/340485/4790/5293/8503/1509/5579/130367/81537/9846/5330/8877/140/8698/7124/5880/2207
hsa04066	HIF-1 signaling pathway	102	-0.56427529573027	-1.60364647896852	0.000541750078903949	0.0020130940431999	0.0011858883306151	5051	tags=50%, list=25%, signal=38%	3091/285/6199/226/2475/2033/817/5160/1950/10000/5230/5595/3643/3098/5604/3460/5291/5336/7422/5594/1956/5970/3939/5290/5211/1906/7037/207/112399/7076/6774/8569/5578/5214/2321/3459/2872/5209/4790/1026/5293/8503/5579/3458/3569/3570/3162/7099/3101/5054/1536
hsa04917	Prolactin signaling pathway	63	-0.570765186962495	-1.56498315659737	0.00345275479098643	0.0117609460067975	0.00692822507401883	4390	tags=46%, list=21%, signal=36%	10000/2592/5595/1432/5604/5291/2099/5594/5970/5290/6464/6654/207/5603/2885/2353/6774/5600/1154/6776/4790/5293/8503/9021/8792/3717/8651/6772/3659
hsa04512	ECM-receptor interaction	80	-0.576744035261505	-1.61140757493496	0.000654860408818538	0.00237932615204069	0.00140163105045371	4546	tags=59%, list=22%, signal=46%	255743/6385/3912/3161/3696/961/6382/3913/7148/2811/7450/3909/3688/1605/3693/3673/131873/1284/3339/948/3672/3675/3691/3685/3690/3918/1282/3680/1311/1291/3910/3381/1292/1278/7057/1293/3676/3678/3695/3694/3371/1277/6696/960/22801/7058/2335
hsa05202	Transcriptional misregulation in cancer	156	-0.583311985186963	-1.68138270269775	5.17183820391245e-07	2.86642558081249e-06	1.6885751852203e-06	3929	tags=46%, list=19%, signal=37%	171558/2005/6760/3486/4609/8148/3728/4286/4149/5914/2115/5747/6935/1655/6667/84444/5468/5970/1051/2308/1643/2120/7704/1050/64919/4299/604/6692/860/578/55589/2078/8013/4208/5090/7030/2321/3087/3576/7048/1031/4086/7490/4005/4790/1026/4094/4066/64332/4616/861/3569/2313/7185/26471/5371/3695/958/597/330/2209/3684/5328/942/929/6688/1436/51513/3002/3560/4318
hsa05219	Bladder cancer	41	-0.591772287540561	-1.55844619988905	0.0111217267815614	0.0336741171997276	0.0198369980606797	5221	tags=54%, list=25%, signal=40%	7157/1871/23604/1950/5595/11186/4609/369/5604/7422/5594/1956/1613/1029/4312/3576/1026/1839/7057/4313/1890/4318
hsa00760	Nicotinate and nicotinamide metabolism	34	-0.593674575405549	-1.53395722229041	0.0173413236604122	0.0497422178680243	0.0293025136644083	4326	tags=44%, list=21%, signal=35%	5167/51548/51547/22978/4860/23057/65220/54981/93100/10135/55191/683/4907/952/4837
hsa04978	Mineral absorption	53	-0.594255935691581	-1.60659203378419	0.00465726063698777	0.01522924228295	0.0089713547007238	3134	tags=36%, list=15%, signal=30%	65010/538/115019/26872/1317/6546/261729/30061/9843/2495/4493/4496/4499/4495/6523/4502/10568/3162/7421
hsa04216	Ferroptosis	39	-0.595482591318702	-1.56019466417624	0.00926704291048044	0.0291377214589145	0.0171646645001814	3980	tags=46%, list=19%, signal=37%	10533/23657/8031/55240/5621/6520/7037/2182/23516/30061/64116/2495/2180/1356/6303/3162/51703/1536
hsa04611	Platelet activation	111	-0.595521190647504	-1.69310242413138	1.62848049829751e-05	7.10017497257716e-05	4.1826235956273e-05	4631	tags=54%, list=23%, signal=42%	84876/3709/5592/10000/5499/5595/1432/2811/5906/10672/7450/3688/10235/5291/23365/5336/60/5594/5584/3673/5290/5331/64805/207/5603/6915/5742/109/5023/115/2771/3690/6786/5600/2149/8605/3710/4638/10125/146850/5293/8503/196883/5739/7094/113/1278/5294/6916/23533/5330/1281/4067/695/1277/2212/54518/83706/2207/3937
hsa04142	Lysosome	129	-0.607709200848817	-1.73885348519606	5.63315411647414e-07	3.0700689934784e-06	1.8085389531838e-06	4269	tags=50%, list=21%, signal=40%	1201/138050/175/4126/57192/8905/4074/26088/2588/23335/6448/950/23312/3920/4125/23431/9114/1510/55353/23163/6272/2717/2799/79158/8943/23062/3423/537/6609/3482/2629/2548/23659/3074/5476/4864/3988/9516/411/2760/1508/1512/53/1075/5660/4668/1509/162/5641/135112/6556/1522/1200/410/1514/1519/968/10312/54/1513/27074/1520/1521/7805
hsa00590	Arachidonic acid metabolism	46	-0.611458874261777	-1.62904414560012	0.00247036231792949	0.00859370721237173	0.00506244461568977	2437	tags=35%, list=12%, signal=31%	9536/5742/5320/2678/247/5730/8605/27306/5740/1573/874/2687/6916/2878/240/26279
hsa05221	Acute myeloid leukemia	66	-0.612439163269302	-1.68870117314562	0.000258691944626926	0.000995203128152997	0.000586261620640587	3835	tags=50%, list=19%, signal=41%	3551/4609/3728/5914/369/5604/6932/5291/5594/8517/5970/5290/6654/5292/7704/1050/207/5467/2885/6774/6776/4790/5293/8503/861/11040/5371/597/2209/3684/929/6688/1436
hsa05160	Hepatitis C	136	-0.619217646922411	-1.77995323060914	4.71687218430223e-08	2.75431643619077e-07	1.62253310099118e-07	3835	tags=49%, list=19%, signal=40%	3551/57506/975/7534/4609/137075/369/5604/836/8772/5465/3454/5291/29110/7189/5594/6041/8517/1956/5970/841/5290/6654/5519/10062/7186/207/8717/3455/578/7187/8737/2885/5610/6774/8837/10686/3716/4790/1026/5293/7533/8503/355/10379/9021/4792/3458/148022/3949/9071/9641/6773/7098/356/4600/3665/23586/3434/6772/7124/4938/4940/91543/4599/4939/3627
hsa04666	Fc gamma R-mediated phagocytosis	91	-0.620515870514299	-1.7485589374484	8.8607955099367e-06	4.02427796076292e-05	2.37065143029008e-05	3398	tags=43%, list=17%, signal=36%	5604/85477/5580/5291/5058/5336/5594/50807/5290/2215/207/3984/5337/10095/4082/3985/2934/5578/23396/8605/3636/5293/8503/5579/9846/10451/8877/4067/2213/7409/2209/3635/653361/7454/2212/5880/3055/5788/2214
hsa04670	Leukocyte transendothelial migration	103	-0.623720084391972	-1.77120961289265	3.00816568039881e-06	1.49040935983396e-05	8.77981370834103e-06	3412	tags=48%, list=17%, signal=40%	3688/5747/5291/9564/5336/60/5290/1535/90952/87/5603/1500/7294/4267/1003/7414/2771/6494/5578/5600/10686/7852/83593/10411/5293/8503/5579/9071/399/2185/3702/6387/4313/10451/3676/5175/4478/7409/4689/4688/3684/653361/3383/7412/5880/3683/3689/1536/4318
hsa04210	Apoptosis	132	-0.625282145557388	-1.79480631047162	4.02362730695703e-08	2.39222932613627e-07	1.40923214769978e-07	3398	tags=44%, list=17%, signal=37%	5604/836/8772/331/5291/9131/60/5594/8517/5970/841/5290/9020/7186/823/207/4170/153090/8717/4000/578/8737/8797/3563/2081/2353/8837/4217/5366/1508/1512/3710/4790/5293/10039/8503/1075/355/840/1509/4792/843/4616/1522/1514/7185/1519/356/597/330/1439/7124/1513/1520/8743/5551/1521/3002
hsa05163	Human cytomegalovirus infection	203	-0.625861765123242	-1.81651972516591	1e-10	8.60526315789474e-10	5.06925207756233e-10	3574	tags=47%, list=17%, signal=39%	10672/2788/64764/5604/836/5747/8772/5291/29110/23365/6667/9564/3579/5533/7422/5594/8517/1956/5970/841/5156/5290/5331/2767/2923/6654/7186/207/5603/4773/8717/578/90993/8737/2885/11214/109/3685/6774/115/2771/3690/5578/5600/1029/7852/3576/3710/3716/2793/4790/1026/5293/54331/8503/355/4772/5734/196883/3554/5579/4792/5732/5733/113/2185/6376/3569/6387/3570/414062/3135/5330/59345/356/6892/51806/3553/6348/…
hsa05167	Kaposi sarcoma-associated herpesvirus infection	177	-0.629097256353759	-1.81903107575147	1.69824718112589e-10	1.32220673387659e-09	7.7889532367428e-10	3398	tags=46%, list=17%, signal=39%	5604/836/8772/3454/6932/5291/29110/5336/5533/2921/7422/5594/8517/5970/841/5290/3572/7186/207/5603/131450/5155/4773/8717/3455/578/7187/100507436/2353/5610/6774/1827/5600/3459/57580/1237/3576/3710/3716/2793/4790/1026/146850/5293/54331/8503/355/4772/10379/2920/4792/1233/148022/7538/2919/3569/9641/3717/6773/5294/23533/7314/3135/59345/7098/9976/4067/51806/3665/4277/3133/6772/3105/3383/942/3055/1234/31…
hsa05170	Human immunodeficiency virus 1 infection	189	-0.640389926332039	-1.85834757195716	1e-10	8.60526315789474e-10	5.06925207756233e-10	3404	tags=42%, list=17%, signal=35%	9582/5604/836/5747/8772/5291/29110/5058/5336/5533/7189/5594/8517/5970/841/5290/2767/2923/7186/207/3984/5603/4773/8717/578/8737/2353/3985/2771/5578/5600/7852/200316/3710/3654/2793/4790/5293/54331/85363/8503/355/4772/27350/5579/162/4792/2185/4615/164668/3135/59345/200315/356/6892/7099/51806/919/25939/917/140564/60489/7097/7133/6891/3133/3105/684/567/7124/5880/920/1234/3107/3106/3134/915/6890/916
hsa04664	Fc epsilon RI signaling pathway	60	-0.640982666592652	-1.74635800975154	9.42970467339449e-05	0.000377889598831224	0.000222610000277206	3156	tags=45%, list=15%, signal=38%	5604/5291/5336/5594/2205/5290/6654/207/5603/2885/5578/5600/8605/5293/8503/9846/10451/4067/695/7409/3635/7124/240/5880/2207/3937/241
hsa05161	Hepatitis B	148	-0.643669046885699	-1.85636967275521	4.3310575194871e-10	3.2936181601681e-09	1.94022894997831e-09	5271	tags=64%, list=26%, signal=48%	5601/3456/7157/1871/2002/468/10488/1642/2033/23118/5606/4776/10000/898/9134/7043/5595/1432/1388/7297/4214/3551/57506/7534/4609/51135/64764/4088/114609/369/5604/836/8772/3454/5291/29110/1654/1960/7189/5594/8517/5970/841/5290/6778/6654/1643/207/5603/3339/4773/537/7187/90993/2885/2353/6774/5578/5600/3576/7048/3716/3654/6776/4790/1026/5293/8503/355/4772/5579/4792/843/6775/148022/2185/4615/3569/1959/9…
hsa04630	JAK-STAT signaling pathway	130	-0.651367788130485	-1.86369046214373	1.13285661310234e-09	7.88178962732906e-09	4.64306293835899e-09	2821	tags=43%, list=14%, signal=37%	282618/1956/5156/5290/6778/6654/5292/896/3572/207/5155/4170/3455/2885/53832/3563/6774/3459/1154/3574/3716/11009/6776/1026/5293/8503/10379/9021/3586/5159/6775/3458/3976/3597/3569/3570/3717/6773/3718/3600/8651/5008/1441/9180/3566/1438/3559/3594/50615/6772/1439/3575/3587/3601/3560/3561
hsa04217	Necroptosis	116	-0.652848642427845	-1.86074712346396	1.50776204252611e-08	9.30260731898185e-08	5.48004873450403e-08	3342	tags=45%, list=16%, signal=38%	8772/3454/2752/331/3460/9525/9131/55072/841/6778/7186/823/10616/8717/6609/3455/8737/8797/5610/6774/8837/8878/3459/8605/3716/6776/355/10379/6775/3458/1540/148022/29108/2495/114548/3717/6773/3718/11035/7098/356/7099/197259/3553/7128/330/6772/7124/81030/834/8743/1536
hsa05135	Yersinia infection	133	-0.65422360032823	-1.87852205644445	9.06981199918272e-10	6.59073005273944e-09	3.88251601368523e-09	3412	tags=49%, list=17%, signal=41%	3688/5604/5747/4210/5291/29110/23365/9564/7189/60/5594/8517/5970/5290/9815/6196/7186/207/3984/5603/4773/6197/10095/2353/23396/5600/391/58484/3576/3654/4790/8935/5293/8503/4772/9844/926/4792/3606/3586/148022/29108/2185/114548/4615/3569/10451/3676/3678/7535/3932/7456/7099/7409/3553/7124/6347/7454/2212/2335/834/925/5880/920/3937
hsa04936	Alcoholic liver disease	120	-0.657648306725303	-1.87630708433216	4.95575434684388e-09	3.17751308121166e-08	1.8718329111918e-08	3893	tags=53%, list=19%, signal=43%	1374/217/3551/257397/51/9663/51135/2194/3592/114609/836/8772/5465/6932/29110/23175/7189/219/2921/84818/8517/5970/841/1375/2308/9020/207/5603/8717/125/7187/8737/4217/5600/3576/3654/4790/355/50507/2920/4792/23765/6720/148022/4615/2919/3569/9641/6319/720/356/23643/728/7099/721/3553/7124/717/929/719/718/712/714/713
hsa05166	Human T-cell leukemia virus 1 infection	213	-0.657748874394593	-1.91535581590755	1e-10	8.60526315789474e-10	5.06925207756233e-10	2452	tags=36%, list=12%, signal=32%	9020/896/207/2114/4773/90993/109/2353/4215/115/4488/1029/8850/5971/4791/7048/8061/8829/3716/1031/6776/4790/1026/5293/8503/4772/196883/3554/4792/7094/1958/7538/113/1030/3569/1959/2113/3718/3600/3135/958/7040/4049/3932/4316/3112/917/3559/3109/3133/3105/3383/567/7124/3108/920/3119/3601/6688/3107/3115/3127/3111/3123/3122/3683/3689/3118/3106/3134/915/3113/3117/916/3560/3561
hsa04933	AGE-RAGE signaling pathway in diabetic complications	99	-0.660086095910644	-1.86712159933644	9.63486574199705e-08	5.43207085798799e-07	3.19996448418414e-07	3454	tags=51%, list=17%, signal=42%	4088/836/5580/2152/5291/5336/7422/5594/5970/5290/5331/1906/2308/5292/1284/207/5603/1729/6774/5578/5600/1282/3576/7048/6776/4790/5293/8503/50507/4772/5579/1958/7056/3569/1278/3717/4313/5330/1281/7040/1277/3553/6772/5054/3383/7412/7124/6347/2335/1536
hsa05146	Amoebiasis	90	-0.676341492510495	-1.90360413374177	5.52773214218461e-08	3.17117264999012e-07	1.86809784306516e-07	3499	tags=56%, list=17%, signal=46%	3592/3909/836/5747/910/5291/2921/5970/5290/5331/5869/2767/87/1284/912/7414/5578/3918/1282/338382/3576/5272/4790/5293/8503/3554/5579/2920/913/911/3586/3458/3910/909/2919/3569/1278/5330/1281/7040/7099/1277/2769/3553/7097/3684/7124/2335/929/3689
hsa05417	Lipid and atherosclerosis	189	-0.677743397364899	-1.96674361215673	1e-10	8.60526315789474e-10	5.06925207756233e-10	2950	tags=46%, list=14%, signal=39%	5533/7189/2921/5594/5468/8517/5970/841/5290/5331/1535/7186/3312/207/5603/948/4773/7187/6403/8797/3309/2081/2353/6774/5452/4217/9619/5578/5600/4312/3576/3654/4790/5293/8503/355/840/4772/10333/3310/19/2920/4792/3606/1573/148022/29108/3949/114548/4615/2919/3569/9641/25833/959/3303/414062/3717/10451/5330/958/356/23643/6648/4067/7099/51806/7409/3553/3665/4689/6348/7097/4688/653361/3383/7412/4973/7124/…
hsa04625	C-type lectin receptor signaling pathway	98	-0.685331733200085	-1.93817855892634	1.92943472596731e-09	1.31442740706523e-08	7.74312620289512e-09	4551	tags=64%, list=22%, signal=50%	3709/8915/4776/10000/5595/1432/3551/51561/10892/93978/3592/5580/868/5291/23365/5058/5336/1960/64170/5533/5594/8517/5970/841/5290/9020/207/5603/4773/22808/5600/5971/4791/3710/4790/5293/8503/6361/4772/10379/4792/1263/3586/6367/1540/29108/114548/3569/1959/9641/6773/30835/602/51806/26253/3553/4046/6772/64581/7124/834/3659/2207
hsa04660	T cell receptor signaling pathway	97	-0.697052296232329	-1.9701784011916	5.9060931089582e-10	4.38930101506666e-09	2.58568191133816e-09	3405	tags=53%, list=17%, signal=44%	5777/5604/1326/4690/868/5291/5058/5533/5594/8517/5970/5290/6654/9020/207/5603/4773/2885/2353/940/5600/9402/4794/10125/4790/5293/8503/4772/926/4792/3586/3458/84433/3702/959/10451/7535/3932/919/29851/917/1493/7409/5133/7124/925/920/5788/3937/915/916
hsa04657	IL-17 signaling pathway	83	-0.69720652147523	-1.95384408094592	1.26378911162433e-08	7.94728922117608e-08	4.68164792362859e-08	4087	tags=63%, list=20%, signal=50%	5595/1432/3551/1673/257397/836/8772/29110/7189/2921/5594/84818/8517/5970/1051/841/7186/6372/5603/8717/7187/6374/2353/29761/5600/4312/3576/8061/4790/2354/6361/2920/4792/23765/3458/6278/2919/3569/9641/6364/4322/3934/6279/3553/6354/7128/7124/6356/6347/6280/4318/3627
hsa04621	NOD-like receptor signaling pathway	156	-0.698629057538638	-2.01378137733788	1e-10	8.60526315789474e-10	5.06925207756233e-10	4087	tags=61%, list=20%, signal=49%	5595/1432/7297/90550/7416/3551/57506/1673/257397/51135/5580/8772/22900/3454/331/4210/29110/64170/7189/2921/5594/55072/6041/8517/5970/841/5331/1535/79184/7186/838/5603/10135/10616/3455/10628/7187/8737/79671/10392/84168/24145/5600/58484/3576/1508/3710/3716/4790/118429/10379/2920/4792/3606/837/79792/148022/29108/8767/114548/4615/2919/3569/9051/9641/7226/6773/84674/5027/11035/5330/114769/64127/51393/…
hsa05235	PD-L1 expression and PD-1 checkpoint pathway in cancer	88	-0.69913538921998	-1.96831996975718	2.03911072425479e-09	1.36079429965575e-08	8.0162677237084e-09	3424	tags=55%, list=17%, signal=46%	114609/5777/5604/3460/5291/5533/7189/5594/8517/1956/5970/5290/55509/207/5603/4773/2353/940/4215/6774/5600/3459/4794/3716/10125/4790/5293/8503/4772/4792/3458/148022/4615/3717/7535/3932/7099/919/917/29126/5133/7097/6772/10538/920/116071/915/916
hsa04613	Neutrophil extracellular trap formation	102	-0.701760123569555	-1.99437253368747	1.04010824346416e-10	8.72090757981487e-10	5.13737674909423e-10	3156	tags=50%, list=15%, signal=43%	5291/83933/9734/5336/60/5594/5970/5290/5331/1535/10105/51564/2215/207/5603/2358/6403/3690/5578/5600/4790/5293/8503/5579/837/79792/5330/51311/366/728/7099/51284/2357/27180/4689/7097/4688/2209/3684/653361/64581/2212/834/5880/6404/718/3683/3689/2214/2359/1536
hsa05169	Epstein-Barr virus infection	184	-0.706178739627779	-2.04915962854807	1e-10	8.60526315789474e-10	5.06925207756233e-10	3396	tags=52%, list=17%, signal=43%	836/8772/930/9612/3454/5291/29110/5336/7189/79685/8517/5970/841/5290/2923/1643/9020/896/7186/207/5603/4734/8717/3455/578/7187/8737/5610/6774/953/5600/5971/965/4791/4794/3716/3654/4790/1026/5293/8503/355/10379/4792/29760/4616/4615/3569/9641/6773/3718/3135/864/958/6892/4067/695/919/3112/917/960/9636/3665/23586/3109/7097/7128/6891/3133/6772/3105/3383/567/7124/4938/3108/3119/3107/3115/4940/3127/3111/…
hsa05145	Toxoplasmosis	107	-0.706570669582673	-2.00464108548777	1e-10	8.60526315789474e-10	5.06925207756233e-10	3585	tags=58%, list=17%, signal=48%	51135/3592/3909/3688/836/331/3460/7189/5594/8517/5970/841/10105/3312/207/5603/6774/2771/5600/3459/3918/3716/3654/4790/146850/3310/4792/3586/3458/3910/3949/4615/959/3303/3717/5294/8651/23533/958/7040/23643/7099/3112/3109/7097/330/6772/7124/240/3108/3587/3119/1234/4261/3115/3127/3111/3123/3122/3118/3113/3117
hsa05134	Legionellosis	56	-0.709405641477607	-1.92829145170129	9.34525491800979e-07	5.00966943965443e-06	2.95113313200309e-06	3499	tags=57%, list=17%, signal=48%	3592/836/3297/2921/5970/841/3312/7100/7415/58484/4791/3576/4790/840/3310/2920/4792/3606/29108/4615/2919/3569/3303/7099/3553/7097/3684/7124/834/929/718/3689
hsa05142	Chagas disease	98	-0.70972597830251	-2.00716763462249	1e-10	8.60526315789474e-10	5.06925207756233e-10	3342	tags=57%, list=16%, signal=48%	8772/3460/624/5291/7189/5594/8517/5970/841/5290/5331/2767/5519/207/5603/1636/2353/8837/2771/5600/3459/3576/7048/3654/4790/5293/8503/355/10333/4792/3586/3458/148022/4615/3569/414062/5330/356/7040/7099/919/917/2769/3553/6348/7097/5054/7124/6347/718/712/714/713/915/916/6352
hsa04668	TNF signaling pathway	109	-0.709768038726098	-2.01837619788308	1e-10	8.60526315789474e-10	5.06925207756233e-10	3476	tags=61%, list=17%, signal=51%	64764/5604/836/8772/1326/5291/2921/5594/8517/5970/1051/841/5290/1906/9020/7186/6372/207/5603/153090/8717/7187/90993/6374/3726/8737/2353/8837/4217/5600/8986/4790/5293/8503/355/840/4323/2920/9021/4792/843/3976/6376/2919/3569/7185/6364/3600/602/11035/64127/4049/197259/3553/7128/7133/330/3383/7412/7124/6347/1435/3659/4318/6352/3627
hsa05162	Measles	122	-0.709999174992533	-2.02585852050916	1e-10	8.60526315789474e-10	5.06925207756233e-10	3585	tags=55%, list=17%, signal=46%	51135/3592/836/8772/3454/868/5291/29110/7189/8517/5970/841/5290/896/3312/207/8717/3455/578/7187/9367/2353/940/5610/6774/103/3716/3654/6776/4790/5293/8503/355/10379/3310/4792/4615/3569/9641/3303/6504/6773/3718/30835/356/4600/4478/2213/7099/51284/917/3559/3553/3665/23586/7097/7128/6772/64135/4938/4940/4599/915/4939/916/3560/3561
hsa04622	RIG-I-like receptor signaling pathway	52	-0.71105137922712	-1.91767768432453	4.95333578221705e-06	2.41752358326116e-05	1.42413267579846e-05	4101	tags=67%, list=20%, signal=54%	7706/1432/4214/3551/57506/3592/8772/55593/29110/1654/7189/8517/5970/841/7186/5603/8717/7187/8737/79671/54941/5600/3576/4790/4792/843/1540/9641/79132/9636/3665/23586/64135/7124/3627
hsa04145	Phagosome	142	-0.713076395327725	-2.05308421144066	1e-10	8.60526315789474e-10	5.06925207756233e-10	2831	tags=50%, list=14%, signal=43%	3693/3673/1783/9114/1778/5869/1535/7037/2215/948/526/537/528/2204/3685/3690/83547/338382/1311/10333/81035/9902/1514/4360/7057/30835/9103/3135/3678/2213/10312/7099/4481/3112/715/3109/4689/7097/4688/8685/6891/2209/11151/3133/3684/653361/3105/4973/64581/7058/3108/2212/3119/929/3107/718/3115/1520/3127/3111/3123/3122/3689/3118/3106/2214/3134/6890/3113/1536/3117
hsa05152	Tuberculosis	159	-0.719034881717082	-2.07330661728382	1e-10	8.60526315789474e-10	5.06925207756233e-10	3017	tags=50%, list=15%, signal=43%	3920/64170/5533/7189/5594/5970/1051/841/9114/5869/2215/207/5603/8717/537/5993/5600/3459/3716/3654/4790/10333/1509/1263/3606/3586/843/3458/8767/9902/4615/3569/4360/3717/30835/9103/7096/8877/7040/64127/3656/2213/10312/7099/51806/3112/7421/26253/3553/3109/7097/2209/11151/4046/3684/6772/3687/64581/7124/3108/2212/3587/3119/929/2207/4261/718/3115/1520/3127/3111/3123/3122/3689/972/3118/2214/3113/3117
hsa04662	B cell receptor signaling pathway	78	-0.719388121964702	-2.00419616633743	2.85706364715471e-09	1.86851962523918e-08	1.10072136300908e-08	3835	tags=67%, list=19%, signal=54%	3551/975/10892/5777/5604/930/5291/5336/5533/10990/5594/8517/5970/5290/6654/207/4773/23547/2885/11027/2353/11024/974/4794/3636/4790/25780/5293/8503/4772/5579/79168/4792/29760/353514/11025/84433/971/10451/27071/4067/2213/8519/695/118788/7409/3635/10859/10288/5880/973/11006
hsa04623	Cytosolic DNA-sensing pathway	46	-0.721533343355397	-1.92230372037282	2.63257199783425e-06	1.34507975514344e-05	7.92369532242876e-06	1541	tags=39%, list=8%, signal=36%	103/4790/4792/3606/29108/3569/9641/11035/3553/3665/23586/388372/9447/81030/834/6351/6352/3627
hsa04060	Cytokine-cytokine receptor interaction	236	-0.722221034530291	-2.11321340297356	1e-10	8.60526315789474e-10	5.06925207756233e-10	2508	tags=50%, list=12%, signal=45%	10344/2829/3572/246778/6372/4982/9966/8741/8744/3455/6374/8797/53832/3563/970/8742/8807/3459/7852/1237/1524/3574/3576/7048/11009/7293/94/27242/944/355/6361/3554/2920/51554/23765/8792/3606/3586/1233/6367/3458/84957/58191/3976/6376/7292/9547/3597/608/2919/3569/6387/959/3570/414062/6364/3600/3603/6370/3604/5008/8740/958/729230/8784/1441/356/7040/4049/9180/1236/8764/3557/3566/3624/6366/1438/3559/3594…
hsa04062	Chemokine signaling pathway	179	-0.724800363919041	-2.09827252034429	1e-10	8.60526315789474e-10	5.06925207756233e-10	3064	tags=56%, list=15%, signal=48%	5604/5580/5747/10235/5291/5058/6369/9564/5336/3579/6368/2921/5594/2869/8517/5970/5290/6464/5331/6654/10344/2829/6372/207/6374/2885/109/6774/115/2771/7852/57580/1237/1524/3576/2793/4790/146850/5293/408/54331/8503/6361/9844/196883/5579/2920/4792/1233/6367/113/58191/2185/6376/9547/3702/2919/6387/414062/3717/6773/5294/6364/3718/6370/10451/23533/5330/59345/729230/4067/1236/6366/1794/7409/2268/6354/635…
hsa04514	Cell adhesion molecules	132	-0.72513084190129	-2.08141143995385	1e-10	8.60526315789474e-10	5.06925207756233e-10	2160	tags=46%, list=11%, signal=42%	6403/84628/947/940/4267/1003/3685/10686/3680/965/9672/926/3385/9071/941/959/6693/3135/201633/3676/3695/958/5175/923/3112/29851/1462/1493/79679/29126/5133/3109/3133/3684/3105/3383/7412/3108/942/925/920/3119/6402/80380/6404/5788/3107/3115/3127/3111/3123/3122/3683/3689/3118/6614/3106/3134/3113/3117/914
hsa05164	Influenza A	148	-0.731164370887403	-2.10871001251602	1e-10	8.60526315789474e-10	5.06925207756233e-10	3398	tags=60%, list=17%, signal=51%	5604/836/8772/3454/3460/5291/29110/60/5594/6041/55916/8517/5970/841/5290/5611/896/207/8717/3455/578/7187/8797/79671/5610/10241/5578/3459/103/3576/3716/23430/4790/5293/8503/355/10379/5579/9021/4792/3606/3458/148022/29108/64499/114548/4615/3569/9641/3717/6773/56649/5371/7177/7098/356/4600/7099/51284/3112/3553/3665/23586/3109/6772/64135/3383/7124/6347/4938/3108/834/3119/4261/3115/4940/3127/91543/311…
hsa04064	NF-kappa B signaling pathway	102	-0.740504121328378	-2.1044813335184	1e-10	8.60526315789474e-10	5.06925207756233e-10	2981	tags=57%, list=15%, signal=49%	5336/7189/2921/8517/5970/9020/7186/8717/7187/8737/8837/79092/5971/4791/3576/3654/4790/3554/5579/2920/4792/8792/29760/1540/148022/4616/84433/4615/2919/6387/7185/959/8740/958/7535/23643/4049/4067/3932/7099/695/6366/3553/23586/6357/6363/597/7128/330/388372/3383/7412/7124/5328/929/4050/6351/10673
hsa05133	Pertussis	72	-0.745351934683635	-2.06684098242447	1.59548653953289e-10	1.27249780104209e-09	7.49612417803644e-10	3585	tags=65%, list=17%, signal=54%	51135/3592/114609/3688/836/7189/5594/5970/6372/5603/6374/10392/2353/2771/5600/3576/3654/4790/840/3586/148022/29108/114548/4615/3569/710/3678/720/23643/7099/51806/721/3394/715/3553/3684/7124/716/717/834/929/3659/718/712/3689/714/713
hsa05143	African trypanosomiasis	33	-0.748634040139086	-1.9216141556874	2.12004038929946e-05	9.00328840650548e-05	5.30372373536296e-05	1269	tags=52%, list=6%, signal=48%	5578/355/5579/3606/3586/3458/3910/4615/3569/5330/356/3553/3383/7412/7124/8542/3620
hsa04610	Complement and coagulation cascades	68	-0.750884154349101	-2.08060608286429	1.3123053366069e-10	1.07280961267614e-09	6.31978622629113e-10	1035	tags=38%, list=5%, signal=36%	3075/7056/5329/710/2162/1675/720/2/728/721/715/3684/5054/3687/629/716/717/5328/11326/719/718/5265/712/3689/714/713
hsa04620	Toll-like receptor signaling pathway	88	-0.75107292754396	-2.11454299814254	1e-10	8.60526315789474e-10	5.06925207756233e-10	3585	tags=68%, list=17%, signal=57%	51135/3592/114609/5604/8772/3454/1326/5291/29110/7189/5594/8517/5970/841/5290/207/5603/7100/3455/7187/8737/2353/5600/3576/3654/4790/5293/8503/10333/3663/4792/148022/941/4615/3569/9641/414062/51311/7096/7098/958/23643/7099/51284/6696/3553/3665/6348/7097/388372/6772/7124/1513/942/929/6351/6352/6373/3627/4283
hsa04659	Th17 cell differentiation	98	-0.754625903301792	-2.13414858080553	1e-10	8.60526315789474e-10	5.06925207756233e-10	2950	tags=61%, list=14%, signal=53%	5533/5594/8517/5970/6778/3572/246778/5603/4773/2353/6774/5600/3459/7048/4794/3716/6776/4790/4772/3554/4792/3458/861/30009/3569/2625/3570/3717/3718/7040/7535/3662/3932/3566/919/3112/917/3559/3594/3553/50615/3109/10148/6772/50943/3108/920/3119/3115/3127/3111/3123/3122/3118/915/3113/3117/916/3560/3561
hsa04658	Th1 and Th2 cell differentiation	84	-0.756127153710837	-2.12099099538137	1e-10	8.60526315789474e-10	5.06925207756233e-10	2950	tags=62%, list=14%, signal=53%	5533/5594/4853/8517/5970/4851/6778/5603/4773/2353/84441/5600/3459/4794/3716/6776/4790/4094/4772/4792/6775/3458/30009/2625/3717/3718/864/7535/3932/3566/919/3112/917/3559/3594/3109/6772/3108/920/3119/3115/3127/3111/3123/3122/3118/915/3113/3117/916/3560/3561
hsa04650	Natural killer cell mediated cytotoxicity	101	-0.756560294617893	-2.14726740193031	1e-10	8.60526315789474e-10	5.06925207756233e-10	3416	tags=61%, list=17%, signal=51%	369/5777/5604/836/9437/3454/3460/5291/5058/5336/5533/5594/5290/6464/3384/6654/2215/117157/4773/3455/100507436/8797/2885/3821/5578/3459/51744/5293/8503/355/4772/5579/3458/259197/2185/10451/3135/4068/10870/356/7535/3932/919/7409/4277/7305/3133/3105/3383/7124/5880/2207/3107/3937/962/3683/8743/3689/5551/3106/2214/3002
hsa04380	Osteoclast differentiation	124	-0.757707984018695	-2.16271080848921	1e-10	8.60526315789474e-10	5.06925207756233e-10	2981	tags=66%, list=15%, signal=57%	5336/5533/10990/7189/5594/5468/8517/5970/5290/1535/9020/2215/7186/207/5603/4982/4773/23547/3455/3726/2885/11027/2353/11024/8878/3690/5600/3459/5971/4791/7048/8061/3716/2355/4790/2354/5293/8503/4772/10379/10326/3554/79168/9021/4792/8792/29760/3458/1540/353514/11025/9846/6773/8651/9103/54209/140885/7040/3932/2213/695/54/3553/4689/4688/126014/7305/2209/6772/653361/55423/7124/10859/10288/1513/2212/14…
hsa05144	Malaria	46	-0.769465267700417	-2.05000359362411	2.43792728316854e-08	1.47630041036317e-07	8.69669966510417e-08	2331	tags=61%, list=11%, signal=54%	948/6403/2995/4035/2532/3576/1311/3606/3586/3458/4615/3569/959/7057/958/5175/7040/7099/3820/3553/7097/3383/7412/7124/7058/6347/3683/3689
hsa05140	Leishmaniasis	72	-0.783217186878116	-2.1718403141544	1e-10	8.60526315789474e-10	5.06925207756233e-10	1698	tags=57%, list=8%, signal=52%	5600/3459/3716/3654/4790/5579/4792/3586/3458/4615/3717/9103/3676/7040/7099/3112/3553/3109/4689/7097/4688/2209/3684/6772/653361/7124/3108/2212/3119/718/3115/3127/3111/3123/3122/3689/3118/2214/3113/1536/3117
hsa05323	Rheumatoid arthritis	85	-0.810185612908116	-2.27718458148111	1e-10	8.60526315789474e-10	5.06925207756233e-10	2403	tags=64%, list=12%, signal=56%	6372/526/8741/537/528/6374/2353/940/2321/4312/3576/2920/8792/3606/3458/941/1514/2919/3569/6387/414062/6364/3600/7040/10312/7099/3112/1493/54/3553/3109/6348/7097/3383/7124/1513/6347/3108/942/3119/4050/1435/3115/3127/3111/3123/3122/3683/3689/3118/10673/3113/3117/6352
hsa04640	Hematopoietic cell lineage	85	-0.810488789099699	-2.27803671726079	1e-10	8.60526315789474e-10	5.06925207756233e-10	2331	tags=67%, list=11%, signal=60%	948/912/931/3672/947/3675/2323/3563/966/3690/3574/926/3554/913/911/945/909/3569/3570/3676/3678/1441/3566/1438/3112/917/3559/960/3553/3109/921/2209/3684/290/7124/951/3108/3575/925/920/3119/929/952/1435/3115/1436/3127/3111/3123/3122/924/3118/915/3113/3117/916/914
hsa04061	Viral protein interaction with cytokine and cytokine receptor	90	-0.819579851445391	-2.30675717876159	1e-10	8.60526315789474e-10	5.06925207756233e-10	2508	tags=70%, list=12%, signal=62%	10344/2829/3572/6372/6374/8797/53832/8807/7852/1237/1524/3576/11009/6361/2920/51554/3606/3586/1233/6367/6376/9547/2919/3569/6387/3570/414062/6364/6370/8740/729230/4049/1236/8764/6366/3559/6354/6357/6348/6362/6363/7133/6846/388372/7124/6356/6347/3587/1435/1234/1436/6351/8743/1230/2833/6355/3560/3561/6352/10563/6373/3627/4283
hsa05416	Viral myocarditis	55	-0.821674788293093	-2.22599279004745	1e-10	8.60526315789474e-10	5.06925207756233e-10	1011	tags=49%, list=5%, signal=47%	941/959/3135/958/3112/3109/3133/3105/3383/3108/942/5880/3119/3107/3115/3127/3111/3123/3122/3683/3689/5551/3118/3106/3134/3113/3117
hsa05321	Inflammatory bowel disease	53	-0.825322244393429	-2.23128800826239	1e-10	8.60526315789474e-10	5.06925207756233e-10	1868	tags=70%, list=9%, signal=64%	6774/8807/3459/4790/4094/4772/3606/3586/6775/3458/30009/3569/2625/7040/64127/7099/3566/3112/3594/3553/50615/3109/7097/6772/7124/50943/3108/3119/3115/3127/3111/3123/3122/3118/3113/3117/3561
hsa04612	Antigen processing and presentation	61	-0.839042342783813	-2.2968560369088	1e-10	8.60526315789474e-10	5.06925207756233e-10	1210	tags=61%, list=6%, signal=57%	926/3310/5641/5721/3458/3805/10437/1514/3303/3135/6892/3112/3109/6891/3133/3105/567/7124/3108/925/920/3119/4261/3107/3115/1520/3127/3111/3123/3122/972/3118/3106/3134/6890/3113/3117
hsa05340	Primary immunodeficiency	32	-0.8506618287968	-2.17815385243435	1.01894150658995e-09	7.24334505771551e-09	4.26696328846592e-09	1210	tags=62%, list=6%, signal=59%	926/29760/959/3718/958/7535/3932/695/29851/6891/3575/925/920/973/5788/4261/915/6890/916/3561
hsa05150	Staphylococcus aureus infection	61	-0.872180655630831	-2.3875712845602	1e-10	8.60526315789474e-10	5.06925207756233e-10	1133	tags=69%, list=6%, signal=65%	3586/3868/3075/25984/9103/1675/720/728/2213/2357/721/3112/715/3109/5724/2209/3684/3383/629/716/3108/2212/717/3119/6404/719/718/3115/3127/3111/3123/3122/3683/712/3689/3118/2214/714/713/2359/3113/3117
hsa04672	Intestinal immune network for IgA production	39	-0.880178582030232	-2.30611263406493	1e-10	8.60526315789474e-10	5.06925207756233e-10	1133	tags=74%, list=6%, signal=70%	3586/941/608/3569/6387/959/3600/6370/3676/3695/958/7040/3112/29851/3109/3108/942/5284/3119/3601/3115/3127/3111/3123/3122/3118/10673/3113/3117
hsa05322	Systemic lupus erythematosus	46	-0.885708336381327	-2.35969750514	1e-10	8.60526315789474e-10	5.06925207756233e-10	1133	tags=70%, list=6%, signal=66%	3586/3458/941/959/720/958/6737/721/3112/715/3109/2209/7124/716/3108/2212/717/942/3119/718/3115/3127/3111/3123/3122/712/3118/2214/714/713/3113/3117
hsa05332	Graft-versus-host disease	32	-0.905128157756026	-2.31761708004655	1e-10	8.60526315789474e-10	5.06925207756233e-10	1269	tags=88%, list=6%, signal=82%	355/3458/941/3569/3135/356/3112/3553/3109/3133/3105/7124/3108/942/3119/3107/3115/3127/3111/3123/3122/5551/3118/3106/3134/3113/3002/3117
hsa04940	Type I diabetes mellitus	37	-0.905135174962847	-2.35933010028755	1e-10	8.60526315789474e-10	5.06925207756233e-10	1269	tags=76%, list=6%, signal=71%	355/3458/941/3135/356/4049/3112/3553/3109/3133/3105/7124/3108/942/3119/3107/3115/3127/3111/3123/3122/5551/3118/3106/3134/3113/3002/3117
hsa05320	Autoimmune thyroid disease	32	-0.913125067561196	-2.33809348948452	1e-10	8.60526315789474e-10	5.06925207756233e-10	1269	tags=88%, list=6%, signal=82%	355/3586/941/959/3135/958/356/3112/1493/3109/3133/3105/3108/942/3119/3107/3115/3127/3111/3123/3122/5551/3118/3106/3134/3113/3002/3117
hsa05330	Allograft rejection	31	-0.920404820879605	-2.34351712273657	1e-10	8.60526315789474e-10	5.06925207756233e-10	1269	tags=94%, list=6%, signal=88%	355/3586/3458/941/959/3135/958/356/3112/3109/3133/3105/7124/3108/942/3119/3107/3115/3127/3111/3123/3122/5551/3118/3106/3134/3113/3002/3117
hsa05310	Asthma	21	-0.925034616185014	-2.18228225814246	1e-10	8.60526315789474e-10	5.06925207756233e-10	1133	tags=86%, list=6%, signal=81%	3586/959/958/3112/3109/7124/6356/3108/3119/2207/3115/3127/3111/3123/3122/3118/3113/3117
