# Supplementary material for: Identifying the Role of Oxidative Stress-Related Genes as Prognostic Biomarkers and Predicting the Response of Immunotherapy and Chemotherapy in Ovarian Cancer
Source: Oxid Med Cell Longev. 2022 Dec 12;2022:6575534. doi: 10.1155/2022/6575534 (PMC9764017; doi:10.1155/2022/6575534)
Supplement: Supplementary 11 — Supplement Table 10: signaling pathway analysis in regard to MAPK13. [file 6575534.f11.txt]

ID	Description	setSize	enrichmentScore	NES	pvalue	p.adjust	qvalues	rank	leading_edge	core_enrichment
hsa05200	Pathways in cancer	485	-0.374997925750074	-1.24372230175574	0.00100325392285567	0.00387137984349011	0.00204999253586607	6926	tags=48%, list=34%, signal=32%	5899/1019/2149/7422/6775/1286/329/2941/2271/3918/7473/8312/27436/8030/4292/5894/9817/405/596/7852/1613/3673/5567/1027/3575/1487/4792/11040/5594/8648/4233/1647/1856/817/7482/6932/5155/3091/6199/8454/5880/183/2932/10023/2776/3569/6654/7175/3065/2773/1950/51561/2261/182/196883/5888/8324/4087/6513/115/4258/3674/8323/25780/6655/356/10125/613/3728/9826/332/2353/3460/26060/7189/8326/59345/81029/1910/359…
hsa05165	Human papillomavirus infection	304	-0.394166302167507	-1.28934821715712	0.00382966666529808	0.0120781794828632	0.0063956983782812	6922	tags=48%, list=34%, signal=33%	1019/7422/9794/1286/7337/3918/7473/8312/5894/3673/6908/5567/1027/5590/5594/50855/7132/1856/7482/6932/28227/1297/5663/6199/7283/2932/526/545/6654/3065/50617/1950/3516/182/8324/23513/3674/8323/537/6655/356/90423/7248/8326/81029/529/9114/3455/3996/7479/10379/523/54626/5584/1452/5293/57801/836/5933/5700/4853/2033/2885/5970/8517/10488/1956/3691/84441/4600/51606/4799/3688/3551/7450/29110/4893/5527/3690…
hsa05168	Herpes simplex virus 1 infection	462	-0.399587468295927	-1.32326161094533	3.95689387760141e-05	0.00021276412981201	0.000112663932666822	7655	tags=41%, list=37%, signal=26%	10838/8893/6347/22835/10482/7561/125893/57232/79818/7644/388558/26149/7700/126375/388536/8890/7772/57506/58500/253639/6429/10794/208/92595/7569/8717/79724/1965/440275/80818/27300/80264/7691/329/8427/347344/596/641339/84527/91664/84436/4792/7592/163059/7132/2923/90333/83744/54811/163081/344787/342892/3569/442319/56242/146434/6428/285268/22869/7553/730087/6041/7752/162966/170960/285267/356/7248/652…
hsa05131	Shigellosis	215	-0.405169928531	-1.31132089349999	0.00234939375828211	0.00794434178058279	0.0042067278363163	7494	tags=52%, list=36%, signal=33%	1399/25851/51196/26100/9844/831/382/5481/208/8717/5600/10097/29108/5333/596/3708/653857/10627/11146/4792/5594/81631/7132/10095/3606/2309/6199/8454/3611/10670/2932/54874/4636/3554/8976/7316/83660/10241/58484/114548/10392/92610/3098/64121/7189/7100/6093/55072/5293/3101/8878/6885/8767/5970/8517/57521/1956/7323/8915/257397/3688/8678/6714/9474/9267/23118/7094/3551/30849/29110/823/100132074/10092/5289/…
hsa04150	mTOR signaling pathway	147	-0.416231708308459	-1.31517467745118	0.0114449751301189	0.0308317605923241	0.0163261890171164	6776	tags=50%, list=33%, signal=34%	201163/7473/5894/5170/54468/5594/7132/9681/84219/1856/7482/1977/6199/10670/2932/526/6654/8408/8649/55004/8324/8323/6655/90423/7248/64121/55437/8326/81029/529/7479/523/51719/6249/5293/2885/57521/5562/51606/9706/3551/4893/6196/3643/3845/51256/6520/5290/9663/6197/220441/79109/5604/9550/5595/7124/6195/81929/83667/2475/5291/6446/528/58528/207/4041/525/79899/8140/7477/64798/8322/245973/8503
hsa00230	Purine metabolism	110	-0.419992676324947	-1.31315604914995	0.01824672015791	0.0460378785522652	0.0243782091178555	5267	tags=38%, list=26%, signal=29%	196883/115/132/53343/203/5158/3614/4907/955/5198/204/9061/10201/5471/10606/50808/56953/272/22978/9060/2618/6241/4832/5141/1633/957/5236/3251/5634/50484/6240/124583/205/55276/5151/109/112/7498/122481/113/22875/2766
hsa04120	Ubiquitin mediated proteolysis	136	-0.423829604041129	-1.33834877967662	0.00689222362445774	0.0196578204245403	0.0104093079911719	7444	tags=57%, list=36%, signal=36%	89910/4734/10393/26272/6502/25898/7337/9320/329/9817/8451/51343/23624/8452/63893/55284/8454/10401/27339/7316/8924/64750/10277/4214/23327/7189/65264/7428/11060/868/4281/7317/9354/83737/8925/331/29945/9039/55120/867/51588/996/11059/7323/8554/8065/55236/55958/64682/8453/84447/90293/29882/246184/991/8450/7319/57448/10075/3093/9690/1642/330/7318/7326/57154/1643/7314/51465/92912/51366/5371/9820/378884/…
hsa01200	Carbon metabolism	103	-0.424420118990997	-1.32232948732357	0.011467910952023	0.0308317605923241	0.0163261890171164	7579	tags=58%, list=37%, signal=37%	226/5162/5315/128/2539/6120/414328/5631/8277/2271/5096/4329/5095/2746/6888/2806/84706/6391/9563/7086/1738/1431/5226/132158/2747/3098/50/5211/84693/4200/48/3101/5160/2875/5230/8801/6392/83440/113675/1743/5091/6389/38/55902/51/5634/847/3417/39/1737/8310/10873/9104/10993/3418/35/3419/84532/4199/2203
hsa05207	Chemical carcinogenesis - receptor activation	166	-0.427536449131329	-1.36244241411711	0.00168434684638379	0.00581542911172507	0.00307941528701745	7064	tags=54%, list=34%, signal=35%	208/3840/6777/402569/7422/2941/5894/405/596/5567/5594/3837/688/993/6199/10728/6654/2773/1950/182/153/196883/1136/164091/406886/115/4258/6655/332/2353/778/6776/5293/3836/5465/4853/990/2885/6256/331/5970/10488/85315/1956/2939/3838/3326/6714/4893/6196/409/3845/23633/604/5290/6197/5604/5595/4790/367/6195/9641/2475/5291/4609/6774/653689/196/6257/207/1388/5241/3320/3717/253152/109/1143/408/112/896/113/…
hsa04919	Thyroid hormone signaling pathway	115	-0.427815023441134	-1.3407021817539	0.0132667750670658	0.0347219100458398	0.0183861205313337	6621	tags=51%, list=32%, signal=35%	5894/5333/2648/5567/5170/5594/8648/3091/9611/1735/2932/3065/476/6513/5208/1733/23389/5211/9969/9440/9968/1827/90390/5293/4853/2033/6256/8850/6714/9442/4893/3690/5469/9882/6548/483/488/3845/5290/5604/5595/5331/8202/10499/2475/25942/5291/4609/9282/4851/6257/207/2626/5330/6772/489/2099/3685/8503
hsa05017	Spinocerebellar ataxia	131	-0.429334637544501	-1.35229082583309	0.00577457767765073	0.0166145743707846	0.0087978330268917	6548	tags=49%, list=32%, signal=33%	3708/6908/5702/9861/2959/9698/292/2776/8408/9821/11273/5701/3516/5714/10524/5707/5709/5689/55102/5293/7419/2081/5700/5718/10105/342371/5717/9706/8678/60673/10213/30849/5289/5687/488/5695/5290/9776/7186/5686/5713/5708/3709/55626/6667/5331/115209/5690/2475/4800/5291/6261/10939/5685/207/6310/7436/23130/4217/5330/489/8503/3710/6712
hsa01240	Biosynthesis of cofactors	128	-0.429919086202184	-1.35189109311178	0.00532752006199328	0.015742581804809	0.00833609113540911	6523	tags=49%, list=32%, signal=34%	224/5805/23057/7372/349565/54995/8566/441024/2677/3145/1738/4522/55163/217/219/53630/195814/10797/5373/203/7360/53354/8942/2990/204/80347/211/10201/51805/2937/50808/55191/7358/4351/56474/4832/5372/27235/65220/493911/2356/210/2730/2235/25902/205/9104/23475/79717/51727/2643/3620/122481/2729/93100/6697/1503/55312/387787/129607/4337/9249/1728
hsa04066	HIF-1 signaling pathway	102	-0.433821195245583	-1.35154393727166	0.00980912695834716	0.0272660478164226	0.0144380548450248	7634	tags=53%, list=37%, signal=33%	1387/226/5162/2321/2064/208/7422/7076/405/596/1027/5594/817/3091/1977/6199/4846/3569/1950/6513/5209/3098/3460/7428/5211/2872/5293/3101/4055/5160/2033/5230/5970/1956/8453/3643/5290/5604/5595/4790/3162/2475/5291/7037/8569/6774/1906/7099/207/3459/3570/1026/8503/1536
hsa04935	Growth hormone synthesis, secretion and action	104	-0.437614410878395	-1.36374036707286	0.0071974675568674	0.0203514599883837	0.0107766075034766	5754	tags=41%, list=28%, signal=30%	2932/2776/6654/2773/196883/6416/115/6655/4214/2353/778/2767/6776/5293/2033/2885/10488/4893/3845/5290/5747/3709/5604/5595/5331/2475/5291/1398/6774/207/1388/3717/109/112/5330/113/6772/8651/1432/8503/3710/6750/5603
hsa04910	Insulin signaling pathway	126	-0.439789255444119	-1.38310227451105	0.0052530105150036	0.0156635222629198	0.00829422712895305	6418	tags=48%, list=31%, signal=33%	5567/5170/5590/5594/1977/6199/5571/2932/6654/5576/51422/6655/7248/5255/3098/868/2872/5584/5261/5293/3101/3636/5499/5577/369/2885/31/5770/5500/57521/867/5562/23265/3551/4893/3643/3845/5290/5257/5509/5604/5595/5256/2475/5291/1398/6720/2002/10211/5105/8569/2194/2889/207/5106/5792/8651/8503/51806/2203
hsa04144	Endocytosis	239	-0.441253544889912	-1.42976606624515	2.89051812184138e-05	0.000161014918971164	8.52614301355649e-05	7747	tags=58%, list=38%, signal=37%	1173/55048/5119/5338/84313/116986/9922/51100/10617/4734/57403/7879/10890/6455/4218/112936/9798/382/92421/9744/10097/2352/55040/7852/653857/5590/50855/23624/1785/10095/163/55616/50807/10015/64145/26286/1213/8723/2350/9815/2261/8976/8394/378/2868/4087/830/25978/9146/84364/51324/5878/64750/3800/11031/23327/7189/868/8411/9829/23096/26056/3559/23396/377/6457/7046/79643/5584/30844/829/11311/83737/29934…
hsa05231	Choline metabolism in cancer	89	-0.443863156605731	-1.37237781840902	0.014900805517906	0.0381833141396341	0.0202190206451849	6626	tags=46%, list=32%, signal=31%	5130/5894/8526/6581/5170/5594/5155/3091/6199/5880/6654/1950/8394/6655/7248/2353/23396/5293/2885/1119/1956/5337/8525/7454/4893/3845/5290/5604/6667/5595/2475/5291/10434/5900/1609/23446/207/56994/8503/126969/80736
hsa04141	Protein processing in endoplasmic reticulum	156	-0.444491083844025	-1.40967582749481	0.000600507646837922	0.00255800659951738	0.00135452852670208	7086	tags=55%, list=35%, signal=36%	10113/1965/6396/440275/9871/165324/3703/596/10905/6400/6185/9601/258010/22872/56886/2923/29927/1649/80700/8454/80267/55432/64215/10483/51360/22926/27248/23193/7841/10277/6184/201595/51009/10525/51128/5611/5034/23190/54431/10294/55768/2081/23471/29978/22824/3303/79139/7323/3326/9632/10130/3304/823/3998/10134/84447/9695/7186/3305/267/10427/11253/3312/7326/9709/4121/3301/7466/5610/26270/51465/9373/6…
hsa04012	ErbB signaling pathway	82	-0.445174310386201	-1.36493893498884	0.0110736748207926	0.0302680445101664	0.0160276872406208	7064	tags=55%, list=34%, signal=36%	208/6777/10298/5894/1027/5594/2069/817/6199/2932/6654/1950/6416/6655/868/1839/6776/5293/25/369/2885/867/1956/145957/6714/4893/4690/3845/5290/5747/5604/5595/685/2475/5291/4609/1398/2002/207/1026/5058/8503/374/7039/2065
hsa04110	Cell cycle	126	-0.450425146280813	-1.41655130634979	0.00231702562388883	0.00791650421495349	0.00419198714848307	9037	tags=72%, list=44%, signal=41%	4999/3066/1869/8697/25847/5000/5111/9126/983/1874/4193/1029/51434/7157/4176/472/1387/7532/10393/6502/9088/701/1019/10926/7029/10971/8318/1027/1031/51343/9184/699/1647/7529/994/993/8454/2932/8556/8317/545/3065/27127/4087/1111/7027/25/9700/4085/4174/5933/5591/7534/2033/990/29945/10274/996/1030/5347/4089/10735/64682/29882/7531/246184/991/1017/9133/1870/7465/7272/4171/4173/4088/4609/7533/7040/9134/23…
hsa05130	Pathogenic Escherichia coli infection	184	-0.451330935299826	-1.44891643409996	0.000175713452177056	0.000847559004618743	0.000448803709120965	6914	tags=54%, list=34%, signal=36%	79861/2149/5600/9871/203068/1364/4643/10097/29108/653857/149461/4792/100506658/5594/7132/10095/3606/4627/10972/3569/10006/3554/8976/114548/356/9826/2353/7189/10383/7100/6093/4644/836/25/51135/137075/79784/10376/6885/5970/8517/9170/112714/23365/4542/257397/3688/6714/84790/9632/9267/23118/3551/55971/4690/10092/114609/5777/7186/10787/841/1366/5595/4790/10427/2017/7124/8797/27128/8772/834/23191/7009/…
hsa05222	Small cell lung cancer	91	-0.452278172487696	-1.40072460796773	0.00996886057447489	0.0274771955330064	0.0145498628464251	4243	tags=49%, list=21%, signal=39%	6502/208/1019/1286/329/3918/596/3673/1027/4792/1647/3674/7189/7185/9618/5293/836/6256/331/5970/8517/1030/3688/3551/10319/7187/5290/7186/1017/1870/5747/4790/330/5291/4609/1643/9134/1871/6257/207/578/3655/1026/3685/8503
hsa05418	Fluid shear stress and atherosclerosis	134	-0.452983021805113	-1.4294916508079	0.000986817779118682	0.00387137984349011	0.00204999253586607	7135	tags=54%, list=35%, signal=35%	1499/801/208/5600/7422/2941/9817/596/5590/7132/3791/5155/5880/4846/7341/1843/90/659/3554/5607/6416/4258/3674/4208/59341/445/2353/5293/8878/6885/5175/5970/8517/2939/51588/5562/3326/3383/6714/3552/3551/3690/653361/4205/5290/5747/7295/7056/4790/1514/7124/3162/5291/6385/4688/653689/1906/207/3320/1535/4217/4780/3553/4318/3685/1432/8503/4257/1728/2938/51806/5603
hsa04914	Progesterone-mediated oocyte maturation	91	-0.453197109904504	-1.40357059597069	0.00951914621513933	0.0266861534920145	0.0141309862842824	7439	tags=57%, list=36%, signal=37%	2771/10393/9088/208/80315/5600/5894/5567/51343/5594/699/22849/994/729597/993/3835/2773/196883/115/6793/5293/6790/4085/369/132864/29945/996/5347/3326/64682/6196/29882/246184/3845/5290/1017/9133/6197/5604/5595/6195/5291/890/207/5241/3320/109/112/113/1432/8503/5603
hsa04060	Cytokine-cytokine receptor interaction	236	-0.456589211155832	-1.47869271889329	5.56483563729839e-06	3.57895311575269e-05	1.89514526347623e-05	4631	tags=40%, list=23%, signal=31%	3595/388372/3455/2919/3559/729230/7046/1524/5618/353500/939/1236/4055/23765/50615/84818/3588/6351/6361/8794/3552/27189/6375/4049/8792/9180/55540/6846/58985/8764/3454/6369/7124/10663/8797/1439/8718/8808/58191/4050/1438/3594/920/6355/7040/90865/56477/10913/6364/10673/3592/6357/6376/10563/1435/3556/944/2920/10148/5008/2833/3576/3600/3601/1234/9966/3459/3625/7133/3557/3587/3561/53832/3570/3553/1230/6…
hsa05132	Salmonella infection	244	-0.457241391719419	-1.48326131600794	4.80443386596657e-06	3.15170861607407e-05	1.6689086060726e-05	7135	tags=58%, list=35%, signal=38%	1499/382/399/208/3840/8717/1434/79861/5600/203068/329/23643/10097/29108/5894/596/653857/10627/4792/5594/1639/6990/1785/51209/7132/391/10095/3606/6932/6993/29109/3569/10006/4636/64746/8976/23339/58484/1780/6416/114548/10392/5878/1781/3800/2353/9648/7189/197259/55823/10383/7100/113146/147700/2316/5293/55207/836/3836/51135/10376/6885/8767/64837/5970/8517/79792/5869/112714/5868/3799/3326/257397/23265…
hsa04211	Longevity regulating pathway	81	-0.459180480829973	-1.40761897807004	0.00513483130260467	0.0154516024518746	0.00818201028420831	7451	tags=59%, list=36%, signal=38%	148327/6794/5564/208/143686/5567/10645/2309/1977/6199/5571/27244/8408/9821/196883/115/51422/79602/7248/26060/5293/5970/57521/10488/5562/60673/9474/79813/51094/4893/3643/3845/5290/9776/5468/4790/847/6648/83667/2475/5291/10919/207/1388/109/112/113/8503
hsa04114	Oocyte meiosis	115	-0.459732596534274	-1.44072662581868	0.00150477698955322	0.0053702380932832	0.00284367549868975	4045	tags=35%, list=20%, signal=28%	6790/9700/5499/4085/7534/132864/5500/29945/996/5347/9748/64682/5527/6196/29882/7531/246184/991/1017/9133/6197/3709/5604/5595/367/26271/6195/7533/9134/8243/5241/109/5528/5519/112/113/1432/3710/51806/5603
hsa03013	Nucleocytoplasmic transport	101	-0.460205892963425	-1.43284419798599	0.00376659506174108	0.0119945939830201	0.00635143776379436	8468	tags=65%, list=41%, signal=39%	23636/26019/129401/22985/79228/6612/4116/59343/79023/10482/3840/1434/64901/6396/402569/23534/9688/100101267/25909/79902/57187/10527/22794/3837/55746/9984/51068/9883/55705/7341/348995/7175/10762/7514/10526/11260/10189/5903/56000/55706/3836/23279/9631/3838/5976/10073/4927/4928/23214/9775/23633/23165/5905/81929/4686/8021/53371/7919/9670/55161/23511/2733/57510/9972/55916/23225
hsa04611	Platelet activation	111	-0.463754260394741	-1.44998014545754	0.00150628629445748	0.0053702380932832	0.00284367549868975	6912	tags=58%, list=34%, signal=38%	2149/5600/340156/5593/3708/3673/10627/5567/5590/5594/5742/4846/2776/5908/2773/83660/4638/196883/8773/115/3674/10125/64805/5906/6093/9002/5584/5293/5499/2207/5500/23533/23365/3688/6714/7094/7450/5294/3690/5290/3709/8673/5595/5331/6850/84876/5291/695/6786/3937/2212/6916/207/109/83706/54518/112/5330/113/4067/1432/8503/3710/5603
hsa04722	Neurotrophin signaling pathway	115	-0.464691596479909	-1.45626731906726	0.00098780657448854	0.00387137984349011	0.00204999253586607	8368	tags=63%, list=41%, signal=37%	387/11108/4145/10818/396/7157/25759/6464/91860/4909/10782/673/1399/801/208/4215/5600/627/5894/596/5170/11213/4792/5594/817/2309/5663/2932/6654/5908/5607/5664/6655/9261/356/4214/7189/5906/5293/25/51135/2885/8767/5970/3551/4893/6196/7531/3845/5290/6197/10019/7161/5604/5595/4790/5580/6195/397/5291/1398/4794/6272/2889/207/4217/3656/3654/1432/8503/51806/5603
hsa04666	Fc gamma R-mediated phagocytosis	91	-0.472370756692338	-1.46295219011767	0.00358105004666095	0.0116295486663841	0.00615813713078745	6662	tags=51%, list=32%, signal=34%	10097/5894/653857/5594/1785/10095/55616/50807/6199/5880/3985/8394/3984/23396/5293/3636/2209/5337/273/7454/10092/2213/653361/5290/8853/5604/5595/5580/6850/2934/3635/5291/1398/3055/2212/207/7409/5788/7410/9846/81873/5058/4067/2214/8503/10451
hsa04115	p53 signaling pathway	71	-0.472681752954011	-1.43993879782087	0.0036922646831901	0.0118731648635917	0.00628713800543207	8321	tags=58%, list=41%, signal=34%	983/27113/4193/1029/7157/8493/472/51246/143686/25898/1019/596/51512/1647/27244/545/10572/1111/901/9538/84883/836/63970/6241/1017/9133/841/7161/8797/50484/83667/1643/9134/637/896/5366/3732/1026/64065/55240/2810
hsa04062	Chemokine signaling pathway	179	-0.472766841797129	-1.51369196344494	9.23950556481322e-06	5.71803363256365e-05	3.02784194278884e-05	6296	tags=54%, list=31%, signal=38%	4792/5590/5594/7074/2309/5880/6372/2932/2776/6654/5908/6374/2773/196883/2868/6354/115/6370/6655/59345/388372/5906/2919/6093/729230/1524/2268/5293/1236/2885/5970/8517/57580/23533/2185/6351/6361/6714/10681/7454/3551/5294/4893/409/653361/6375/3845/5290/5747/6846/56288/1794/5604/5595/4790/5580/5331/6369/10663/58191/5291/1398/6355/56477/2790/6364/3055/6774/6357/6376/10563/6773/207/2920/7409/3717/2833/…
hsa04750	Inflammatory mediator regulation of TRP channels	87	-0.474870268757425	-1.46621216955559	0.00328089074234978	0.0107613216349073	0.00569838918408119	4071	tags=30%, list=20%, signal=24%	5293/5499/5029/5500/6714/5290/2150/3709/5580/5331/5291/51393/3556/109/5583/5732/112/5330/113/3553/1432/8503/3710/1573/51806/5603
hsa04140	Autophagy - animal	136	-0.475603053116737	-1.50183649202449	0.000103424353602255	0.000516187413053066	0.000273334156462632	7465	tags=60%, list=36%, signal=38%	51100/26100/64422/7879/6794/4218/208/1965/440275/5894/596/1613/3708/9110/5567/5170/5594/81631/203228/10645/22808/9342/64419/3091/81671/285973/89849/6199/53349/10670/8408/10533/9821/84938/7248/64121/7189/55102/1509/5293/8878/2081/6885/57521/5562/58476/23710/9706/8678/60673/9474/115201/30849/29110/4893/5289/3845/5290/9776/55626/5604/8673/5595/5580/1508/1514/8837/2475/1612/5291/10010/58528/207/3920/…
hsa04070	Phosphatidylinositol signaling system	89	-0.476572947851996	-1.4735130247966	0.00146638109621613	0.00534414443954323	0.00282985825585569	6611	tags=51%, list=32%, signal=34%	5333/8526/3708/9110/9807/3707/64419/55613/8394/80271/22908/5305/56623/23396/3705/79837/5293/3636/8821/5298/3633/3628/8525/5297/5289/5290/8776/3709/5331/3635/5291/4952/5287/1609/64768/8871/1040/4534/5330/55300/3706/3613/8503/3710/51806
hsa01524	Platinum drug resistance	71	-0.478240509197156	-1.45687253544055	0.00253024441530561	0.00846857314510448	0.00448432146643851	6773	tags=62%, list=33%, signal=42%	27113/4193/1029/7157/472/2064/208/329/2941/5980/4292/596/5170/7507/5594/4258/356/332/7153/5293/836/331/2939/4436/5290/841/5595/8772/538/330/2956/5291/653689/207/4217/637/5429/5366/578/1317/1026/8503/4257/2938
hsa04068	FoxO signaling pathway	123	-0.481993487621032	-1.51396809866012	0.000146532159287512	0.000717351466362746	0.000379855558247282	7640	tags=61%, list=37%, signal=39%	472/1387/673/116986/6794/6502/5564/208/51701/5600/23678/5894/5170/1027/3575/5594/1647/2309/7874/5571/3569/6654/1950/3586/51422/10733/6655/356/1901/901/7046/5293/2033/369/2885/1956/1030/5562/5347/23710/4089/3551/4893/3643/100132074/3845/604/5290/1017/9133/1263/5604/5595/847/6648/4303/4088/8698/5291/10018/7040/6446/5105/114907/6774/5934/80854/207/9455/5106/1026/1432/8503/8743/5603
hsa04213	Longevity regulating pathway - multiple species	57	-0.482115446907142	-1.44038739660296	0.0123269159601855	0.0328717758938281	0.0174064281851144	5995	tags=53%, list=29%, signal=37%	2309/6199/5571/3065/196883/115/51422/5293/57521/3303/5562/9474/3304/4893/3643/3845/5290/3305/3170/847/6648/3312/2475/5291/81570/207/109/112/113/8503
hsa04218	Cellular senescence	152	-0.483230139864523	-1.5282792081801	2.89630494490813e-05	0.000161014918971164	8.52614301355649e-05	7124	tags=56%, list=35%, signal=37%	801/5481/208/5883/1019/5600/90550/10758/5894/3708/3364/5594/22808/5928/1647/2309/993/292/3569/545/4775/4772/4087/1111/9261/7248/59341/7046/2113/5293/8878/28996/5499/7419/3805/5933/54822/5500/5970/10114/1030/4683/132660/3552/823/4893/3845/5290/204851/1017/9133/1870/2305/4773/3709/5604/5595/4790/4088/2475/5291/4609/7040/9134/1871/83593/890/5934/207/3576/2626/678/896/3135/1026/3105/1432/3133/8503/31…
hsa04071	Sphingolipid signaling pathway	115	-0.484093821813047	-1.51707071401535	0.000192160037773317	0.000913456411444174	0.000483698035585009	7199	tags=54%, list=35%, signal=35%	1903/208/8717/5600/130367/5894/596/5170/5590/5594/7132/8439/28227/5880/4846/2776/6610/29956/2773/259230/123099/9294/9517/1901/4363/6609/6093/1509/55304/253782/5293/2207/5970/5337/4893/5527/3845/5290/7186/5604/5595/4790/5331/7124/8698/140/5291/166929/207/10558/4217/5528/637/81537/5519/9846/5330/5522/1432/340485/8503/5603
hsa00480	Glutathione metabolism	54	-0.486965855084031	-1.44931369803535	0.0146839481240406	0.0379238975172072	0.020081653049869	5311	tags=43%, list=26%, signal=32%	5226/4258/2877/2878/10314/2937/2939/6241/494143/2730/50484/3417/6240/653689/3418/26873/2678/2729/51056/290/4257/124975/2938
hsa05223	Non-small cell lung cancer	72	-0.488017278116262	-1.48790803739197	0.00114584522199252	0.00431996819325915	0.00228753129617381	8095	tags=62%, list=39%, signal=38%	1029/7157/6789/3718/5915/673/2064/208/6777/1019/27436/5894/5170/5594/4233/1647/2309/6654/1950/6655/3800/6776/5293/369/2885/6256/1956/3799/4893/3845/5290/1870/5604/5595/5291/1643/6774/1871/83593/6257/207/578/1026/8503/7039
hsa01522	Endocrine resistance	93	-0.489892920690723	-1.51730417331543	0.000450657534306365	0.00199750907097956	0.00105773105491537	8146	tags=67%, list=40%, signal=40%	4193/1029/4855/7157/25759/2100/6464/673/2064/10498/208/1019/5600/5894/596/5567/1027/1031/5594/6199/9611/6654/182/196883/1565/115/6655/2353/2852/1839/5293/4853/369/2885/1956/6714/4893/5469/3845/638/5290/1870/5747/5604/6667/5595/8202/2475/5291/3714/1871/4851/207/109/112/113/1026/2099/4318/1432/8503/5603
hsa04146	Peroxisome	75	-0.490062898167815	-1.49668336844112	0.00155416178523202	0.00548134479092584	0.00290250927632466	8268	tags=68%, list=40%, signal=41%	283927/92960/8799/55670/5828/8309/26061/5830/10478/23600/30/3155/23417/5193/2181/5827/5189/3295/10005/8800/55711/51268/55825/10901/5052/8504/10455/5190/2180/5825/5192/8540/5264/51703/51/847/6648/3417/5191/5194/1962/6342/255027/390916/8310/215/3418/8528/7498/11001/1384
hsa04061	Viral protein interaction with cytokine and cytokine receptor	90	-0.490102729350313	-1.51803685946228	0.000719690247447605	0.0029880810273774	0.00158226370191679	4617	tags=51%, list=22%, signal=40%	6354/3586/6370/388372/2919/3559/729230/1524/1236/4055/3588/6351/6361/8794/6375/4049/6846/58985/8764/6369/7124/8797/6355/56477/6364/6357/6376/10563/1435/2920/2833/3576/1234/7133/3587/3561/53832/3570/1230/6352/3560/1436/6373/4283/8743/3627
hsa05211	Renal cell carcinoma	65	-0.491086767336788	-1.48788642962074	0.00457198806957075	0.014147283837917	0.00749134092829368	7634	tags=63%, list=37%, signal=40%	1387/673/1399/208/10298/7422/201163/2271/5894/405/5594/4233/5155/3091/6654/5908/6513/6655/7428/5906/2113/5293/2033/369/2885/4893/8453/3845/5290/5604/5595/5291/1398/7040/2889/207/1026/2034/5058/8503/7039
hsa05163	Human cytomegalovirus infection	203	-0.49264364678314	-1.59014957569595	2.4358451976331e-07	2.15934385087475e-06	1.14342662193303e-06	3752	tags=37%, list=18%, signal=31%	2885/11214/5970/8517/10488/1956/2185/3588/23365/6351/6714/10681/3551/29110/4893/3690/3845/5290/7186/1870/4773/5747/841/3709/5604/6667/5595/4790/5331/7124/8772/2475/5291/4609/1398/2002/2790/3716/6774/1871/6376/207/1388/3576/8737/1234/109/5732/637/3587/2786/112/3570/567/5330/113/3553/1230/6352/578/3135/6892/1026/3105/3685/1432/3133/8503/3134/3710/3106/3107/6891/51806/6890/5603
hsa04630	JAK-STAT signaling pathway	130	-0.492645734069433	-1.55184723997059	2.19651160507128e-05	0.000126395755519891	6.69297164980168e-05	5690	tags=48%, list=28%, signal=35%	3569/10401/6654/1950/51561/3586/6655/3460/3595/3455/3559/10379/6776/5293/5618/2033/2885/1956/50615/51588/3588/8554/5771/5777/9180/5290/9306/58985/3454/4170/1439/2475/1438/3594/5291/6778/4609/3716/6774/3592/6773/207/5008/3717/3600/3601/3459/3587/3561/53832/3570/896/1154/3597/3560/6772/1026/8651/1441/5292/3566/9466/8503
hsa00280	Valine, leucine and isoleucine degradation	46	-0.493940320995243	-1.45114949374692	0.0190449712585551	0.0476851188763823	0.0252504641033475	6975	tags=61%, list=34%, signal=40%	3155/34/5096/4329/5095/224/11112/3032/1738/3712/217/219/1629/84693/3157/56922/223/65985/5019/594/549/38/1962/39/259307/3033/35/3158
hsa03050	Proteasome	43	-0.494149939780651	-1.4389255932228	0.0131822930545992	0.0347219100458398	0.0183861205313337	6477	tags=58%, list=32%, signal=40%	5702/9861/5720/10197/5701/5714/5707/5709/5689/5700/5718/5721/5717/10213/5687/5695/5686/5713/5708/5690/23198/5685/5699/5696/5698
hsa05220	Chronic myeloid leukemia	76	-0.495347895267216	-1.51414650216612	0.000993781211027786	0.00387137984349011	0.00204999253586607	8146	tags=67%, list=40%, signal=41%	4193/1029/7157/25759/6464/673/1399/208/6777/1019/5894/1027/1487/4792/5594/1647/6654/3065/6655/613/7046/6776/5293/25/369/2885/5970/8517/867/4089/3551/4893/3845/5290/1870/5604/5595/4790/4088/5291/4609/1398/7040/1643/1871/207/9846/578/861/1026/8503
hsa05210	Colorectal cancer	85	-0.497735976345755	-1.53215553804942	0.000694966406494383	0.00292242283756612	0.00154749604684984	7135	tags=60%, list=35%, signal=39%	1499/208/5899/8312/4292/5894/596/5594/1647/2069/6932/6199/5880/2932/6654/1950/4087/6655/332/2353/26060/7046/5293/836/369/2885/1956/4089/4436/4893/3845/5290/51176/5604/5595/2956/4088/2475/5291/4609/10018/5900/7040/1643/207/5366/578/1026/8503/374/7039
hsa05212	Pancreatic cancer	76	-0.498971114766961	-1.5252217185636	0.00080867081323341	0.00331555033425698	0.00175566689715148	7623	tags=62%, list=37%, signal=39%	5338/673/2064/208/5899/1019/7422/5894/5594/1647/6199/5880/1950/5888/4087/7046/5293/369/5970/8517/1956/5337/4089/10928/3551/3845/5290/1870/5604/9459/5595/4790/4088/2475/5291/5900/7040/1643/3716/6774/1871/207/578/6772/1026/8503/7039
hsa05203	Viral carcinogenesis	161	-0.500085822949238	-1.59061051318895	6.59857880528547e-07	5.1531758288896e-06	2.72873559617068e-06	8484	tags=73%, list=41%, signal=43%	2967/5902/387/983/1233/87/5829/4193/1386/1029/7157/3718/1387/22938/5315/7532/148327/1108/6502/8717/6777/1019/7337/10971/2648/6908/5567/1027/4792/2959/5594/51564/2957/7529/7874/9093/5922/2960/2965/3065/3516/23513/10013/1111/9261/5423/9114/55869/10379/7185/6776/5293/836/10014/7419/5966/5933/4055/5700/7534/2033/3190/2885/5970/8517/10488/1654/79885/1959/1030/8850/6714/9734/4893/7531/991/3845/23352/71…
hsa05213	Endometrial cancer	57	-0.503848920448101	-1.50531919161933	0.00491417367492627	0.0149245274571835	0.00790291088072938	7612	tags=63%, list=37%, signal=40%	673/2064/1499/208/8312/4292/5894/5170/5594/1647/2309/6932/3611/2932/6654/1950/6655/5293/369/2885/1956/4893/3845/5290/51176/999/5604/5595/5291/4609/2002/1643/207/578/1026/8503
hsa04915	Estrogen signaling pathway	112	-0.5048934847301	-1.58007656923172	3.68731889631773e-05	0.000201573432998702	0.000106738178577618	5802	tags=57%, list=28%, signal=41%	5894/596/3708/5567/5594/8648/4846/2776/6654/2773/196883/115/5443/6655/2288/2353/2852/1509/1839/5293/2885/3303/10488/1956/3326/6714/3304/4893/3845/5290/3709/9568/5604/3305/6667/5595/5580/5331/3860/3312/8202/3880/10499/5291/207/1388/5241/3320/9166/109/112/5330/113/3861/2099/3866/4318/8503/3710/25984/3868/2289/7039/51806
hsa00562	Inositol phosphate metabolism	71	-0.50516705911743	-1.53889936148017	0.000496450764259099	0.0021425769825919	0.00113454814546747	7463	tags=63%, list=36%, signal=40%	51196/9562/200576/8867/4329/5333/9110/27124/3707/64419/55613/8394/80271/22908/5305/9896/56623/23396/3705/79837/5293/3636/8821/5298/3633/3628/5294/5297/5289/5290/8776/138429/5331/3635/5291/4952/5287/64768/8871/4534/5330/55300/51763/3706/3613
hsa05170	Human immunodeficiency virus 1 infection	189	-0.5053274260595	-1.62610834520114	3.52189281905279e-08	3.90015590369464e-07	2.06523018006937e-07	3193	tags=54%, list=16%, signal=46%	5894/596/7852/3708/8451/4792/5594/7132/85363/2923/6199/8454/5880/3985/2776/545/2773/4775/4772/164668/1111/356/3984/2353/7189/59345/200315/2767/5293/836/51135/6885/5970/8517/2185/8065/10681/27350/23118/3551/919/29110/4893/162/164/8450/3845/5290/7186/9133/4773/5747/7465/841/3709/5604/5595/4790/7124/917/1642/8772/130340/2475/920/5291/1398/2790/916/7099/4615/915/200316/207/8737/1234/7133/637/2786/567…
hsa04217	Necroptosis	116	-0.509490628716903	-1.59676645691831	1.13576076921957e-05	6.89869504266702e-05	3.65303171386411e-05	7088	tags=60%, list=35%, signal=40%	5481/8717/92421/6777/6775/329/29108/596/2746/246/7132/817/292/11124/25978/114548/356/2747/3460/197259/3455/6609/10379/79643/55072/6776/8878/7419/54822/331/2495/3326/3552/823/7186/841/3454/81030/7124/8797/8837/2752/8772/330/834/11035/9131/6778/51510/7098/1540/5610/90865/3716/6774/7099/6773/3320/3717/8737/3459/57132/148022/637/7128/9525/3553/6772/1536/8743
hsa05135	Yersinia infection	133	-0.512507772730421	-1.61695547407847	1.62038211877453e-06	1.13081986161287e-05	5.98797423511306e-06	6296	tags=59%, list=31%, signal=41%	10097/29108/653857/4792/5594/391/10095/3606/5880/8935/2932/926/2776/3569/9815/8976/7535/8394/4775/58484/4772/6416/3586/114548/3984/2353/7189/6093/23396/5293/51135/6885/5586/5970/8517/2185/23365/3688/6714/7454/23118/3551/29110/6196/10092/3676/5290/7186/4773/6197/925/5747/5604/5595/4790/7124/6195/834/920/5291/1398/3932/3937/7099/4615/2212/644150/207/7409/3576/7410/148022/3553/81873/3654/1432/8503/1…
hsa00513	Various types of N-glycan biosynthesis	36	-0.514462470525564	-1.46086354539151	0.0195896897161621	0.0486774108098574	0.0257759075212659	7502	tags=67%, list=37%, signal=42%	79087/4247/79796/3074/3703/10905/6185/4245/11282/56052/3073/6184/79868/201595/4124/8704/11320/11253/4121/85365/83539/4122/283358/2683
hsa05167	Kaposi sarcoma-associated herpesvirus infection	177	-0.519447237142235	-1.66201257463128	2.19360439980144e-08	2.56965086833883e-07	1.36069445852345e-07	3593	tags=41%, list=17%, signal=34%	5970/8517/57580/23533/7538/3383/8678/6714/10681/3551/5294/29110/4893/5289/3845/7187/5290/7186/51176/1870/4773/841/3709/5604/5595/4790/3454/6850/718/8772/9641/2475/5291/3665/4609/7098/5610/7314/2790/3055/3716/6774/1871/6773/207/2920/3717/3576/1234/3459/100507436/942/148022/637/2786/1230/578/3135/6772/1026/4067/3105/1432/3133/8503/3134/3710/3106/3107/4277/51806/5603
hsa00071	Fatty acid degradation	39	-0.521359829847136	-1.50120401441034	0.0133382947127312	0.0347219100458398	0.0183861205313337	7455	tags=64%, list=36%, signal=41%	30/128/34/1375/2181/224/1632/3032/217/219/113612/37/223/10455/2180/38/51703/51/1962/39/8310/3033/1374/35/1376
hsa04064	NF-kappa B signaling pathway	102	-0.521485770561866	-1.62465766841416	1.4969972852655e-05	8.92754744667423e-05	4.72735984820683e-05	4738	tags=50%, list=23%, signal=39%	7189/388372/2919/7185/51135/4055/6885/331/5970/8517/51588/6351/3383/8915/257397/23118/3551/7706/114609/4049/29760/8792/7187/7186/4790/29775/7124/6850/9020/8837/330/4050/695/1540/10913/10673/6357/3932/7099/4615/929/2920/3576/8737/148022/7128/79092/3553/3654/4067/23586
hsa04142	Lysosome	129	-0.521584913188448	-1.64113349575488	1.31174112449686e-06	9.35328453989062e-06	4.95279829615517e-06	5896	tags=57%, list=29%, signal=41%	138050/1213/8722/6556/8372/2548/3073/2720/50617/3988/23457/2717/537/23659/9114/5660/10947/2990/6609/1509/256471/4669/1200/1777/23335/53/1521/10239/410/5538/285362/23431/51606/1201/1497/26503/6448/4126/162/164/5641/4864/950/2519/23062/2799/8763/533/1508/1514/4668/1512/130340/55353/9374/5476/6272/4891/79158/3482/1522/4758/9516/3920/2629/4074/1515/1075/54/7805/135112/10312/1520/27074
hsa04623	Cytosolic DNA-sensing pathway	46	-0.522196220268223	-1.53416262748489	0.00540448764622924	0.0158274281068142	0.00838101937620136	3593	tags=41%, list=17%, signal=34%	5970/8517/6351/3551/29110/4790/81030/9641/834/11035/3665/103/90865/9533/8737/3553/6352/23586/3627
hsa04210	Apoptosis	132	-0.522454694323267	-1.64629699390741	9.85954616380758e-07	7.52077009704392e-06	3.98243602699694e-06	7141	tags=65%, list=35%, signal=43%	27429/1519/208/8717/1965/4001/79861/329/835/5894/596/3708/5170/4792/5594/7132/1647/1649/8722/6709/356/332/2353/1509/7185/143/5293/836/2081/1521/10376/331/5970/8517/4000/10039/63970/112714/3002/84790/3551/823/4893/3845/5290/7186/841/3709/5604/5595/4790/1508/1514/7124/9020/8797/4170/8837/1512/8772/1439/330/1616/9131/5291/5551/10018/1522/839/840/207/2021/8737/4217/153090/1515/637/113457/843/1075/536…
hsa04917	Prolactin signaling pathway	63	-0.525153159849247	-1.58704124468796	0.000917732309216074	0.00371624935089966	0.0019678470567986	4113	tags=41%, list=20%, signal=33%	6776/5293/5618/2885/5970/6714/4893/3845/8792/5290/9306/5604/5595/4790/5291/6774/207/3717/3659/1154/6772/8651/2099/1432/8503/5603
hsa05166	Human T-cell leukemia virus 1 infection	213	-0.528019995718918	-1.70803074215403	1e-10	2.73333333333333e-09	1.44736842105263e-09	5370	tags=52%, list=26%, signal=39%	83660/2224/4775/196883/4772/10524/7514/8829/4087/6513/2114/6416/115/1111/8295/5423/4214/2353/2005/3559/8061/7046/2113/6776/5293/9700/7419/4085/4055/2033/331/29945/5970/8517/10488/1959/996/1030/7538/8850/4089/3383/7094/3551/64682/4893/6688/29882/246184/991/4049/3845/5290/1017/9133/1870/4773/5604/5595/4790/7124/9020/917/4088/920/5291/4609/2002/7040/9134/64784/3716/3932/1871/916/890/6722/915/207/138…
hsa05417	Lipid and atherosclerosis	189	-0.528038979761577	-1.69919253795002	7.40058615458811e-10	1.27757487300258e-08	6.76507875627168e-09	4071	tags=44%, list=20%, signal=36%	5293/836/2081/51135/6885/6256/5970/8517/3303/3326/3383/6714/3304/23118/3551/29110/4893/114609/653361/3845/7187/5290/4689/7186/5468/4773/5747/841/3305/5595/4790/5331/7124/3949/8797/6648/3312/9641/834/5291/3665/4688/6774/3592/7099/4615/839/840/10010/929/6257/207/2920/3309/7409/7436/3320/3717/3576/1535/4217/7410/148022/10333/637/4780/4973/5330/3553/7097/6352/3654/4067/4318/1432/25833/8503/1536/10451…
hsa05221	Acute myeloid leukemia	66	-0.529869550536692	-1.60785828913612	0.000215214307179693	0.00100843275364199	0.000533990386235328	4113	tags=48%, list=20%, signal=39%	6776/5293/2209/369/2885/8864/5970/8517/3551/4893/6688/3845/5290/51176/5604/5595/4790/2475/5291/4609/6774/890/929/5371/207/5467/1050/3684/861/1436/5292/8503
hsa04660	T cell receptor signaling pathway	97	-0.531525076263405	-1.6512263142222	6.28751734989254e-06	3.96597248223991e-05	2.10008170593577e-05	5754	tags=55%, list=28%, signal=40%	2932/926/6654/7535/4775/4772/3586/6655/10125/2353/868/7006/5293/2885/6885/5970/8517/29851/8915/1326/3551/919/5133/4893/4690/3845/5777/5290/4773/925/5604/5595/4790/7124/9020/917/1493/920/5291/4794/3932/3937/916/915/207/7409/5788/7410/5058/1432/8503/10451/5603
hsa00020	Citrate cycle (TCA cycle)	29	-0.534235994133782	-1.46477658900068	0.0172239548808877	0.0437942418676835	0.0231901473304486	5875	tags=62%, list=29%, signal=44%	6391/1738/1431/50/48/5160/8801/6392/47/1743/5091/6389/3417/1737/5105/3418/5106/3419
hsa05160	Hepatitis C	136	-0.536735868249949	-1.69487876125633	6.56736199019172e-08	6.73154603994651e-07	3.56452213283432e-07	7136	tags=67%, list=35%, signal=44%	57506/1499/208/8717/1965/1019/440275/1364/5894/10062/10971/149461/4792/100506658/5594/7132/7529/10197/2932/6654/1950/6041/6655/356/7189/3455/10379/5293/836/137075/5465/7534/369/2885/6256/5970/8517/1956/4600/8554/3551/29110/4893/7531/3845/7187/5290/7186/1017/1870/841/949/5604/1366/5595/4790/3454/7124/3949/8837/8772/9641/5291/3665/4609/7098/7533/5610/3716/6774/1871/6773/207/8737/148022/637/5519/343…
hsa04936	Alcoholic liver disease	120	-0.541079996451811	-1.70012349177572	2.8623200244115e-07	2.47063412633414e-06	1.30826261503573e-06	7135	tags=70%, list=35%, signal=46%	1499/5564/208/8717/23417/34/5600/2921/1375/23643/224/4792/7132/10645/2309/6932/5571/2932/3569/217/219/6416/51422/79602/356/7189/2919/836/51135/5465/6885/31/23765/5970/8517/37/223/5562/84818/257397/51094/728/23118/3551/29110/114609/79966/7187/51176/9663/841/4790/51/7124/9020/718/8772/9641/6319/6720/8310/2194/3592/7099/4615/929/207/2920/3576/717/8737/4217/148022/712/719/1374/713/3553/714/3654/1432/…
hsa04668	TNF signaling pathway	109	-0.541291128480088	-1.69241486933416	6.19142587540666e-07	4.95314070032533e-06	2.62281198829807e-06	4878	tags=52%, list=24%, signal=40%	602/2353/197259/2919/7185/5293/836/83737/6885/5970/8517/10488/3383/1326/257397/23118/3551/4049/7187/5290/7186/841/5604/8986/5595/4790/7124/9020/8837/8772/330/11035/5291/6364/6376/1906/1435/840/207/2920/1388/8737/3600/4217/153090/7133/7128/3659/843/3553/6352/4318/64127/1432/8503/3627/5603
hsa04514	Cell adhesion molecules	132	-0.542183577495771	-1.70846430030344	9.2993348598003e-08	9.24297525458939e-07	4.89438676831595e-07	3668	tags=41%, list=18%, signal=34%	50848/5175/29851/6693/3383/3688/4359/5133/923/3676/925/999/1366/1493/29126/80380/920/214/6385/3695/6402/3683/942/5788/6614/5792/965/3684/914/3127/3135/3115/3655/3105/3689/6404/3685/3133/3112/3134/3119/3117/9071/3106/3680/3107/3123/3108/3113/3109/3122/3111/3118/79679
hsa00510	N-Glycan biosynthesis	48	-0.543691148413276	-1.6047122136509	0.00133375527664233	0.00491541270492904	0.00260283407032507	6806	tags=67%, list=33%, signal=45%	79796/3703/10905/6185/4245/11282/56052/23193/7841/6184/8818/79868/201595/1798/4124/84920/4248/4249/8704/11320/11253/146664/4121/29929/79644/85365/4122/22845/57171/79053/6480/2683
hsa04662	B cell receptor signaling pathway	78	-0.543955196248903	-1.66183214477739	4.44586881420688e-05	0.000235200801783848	0.000124544712112756	6296	tags=56%, list=31%, signal=39%	4792/5594/5880/2932/6654/4775/4772/25780/6655/2353/971/5293/3636/2885/5970/8517/8915/10288/3551/4893/2213/29760/3845/5777/5290/4773/5604/5595/4790/6850/118788/3635/10859/5291/695/4794/11006/207/7409/7410/4067/27071/8503/10451
hsa00520	Amino sugar and nucleotide sugar metabolism	46	-0.544494002976876	-1.5996713837333	0.00162252616863045	0.00566158067351903	0.00299794868783903	7142	tags=74%, list=35%, signal=48%	140838/132789/29925/3074/8790/55577/91373/55907/51005/3073/2673/10020/5373/3098/6675/7360/606495/3101/51167/2585/54187/7358/2584/4351/5372/5236/80896/64841/5238/51706/51700/55276/2762/5973
hsa05161	Hepatitis B	148	-0.547147807779478	-1.72915698014582	2.06644448453904e-09	3.05666372347307e-08	1.61857995626783e-08	5292	tags=57%, list=26%, signal=42%	4775/4772/6416/537/6655/356/4214/332/2353/7189/7046/6776/5293/836/7419/51135/7534/2033/369/2885/6885/5970/8517/10488/1654/1959/2185/4089/6714/23118/3551/29110/4893/114609/3845/7187/5290/1017/1870/4773/841/5604/5595/4790/3454/7124/1642/8772/9641/4088/5291/3665/6778/4609/7098/2002/7040/1643/9134/3716/6774/1871/890/7099/4615/6773/1960/207/1388/3717/3576/148022/637/843/7097/6772/1026/3654/4318/23586/…
hsa05134	Legionellosis	56	-0.547724634124843	-1.63713305557097	0.000258330973628204	0.00117684110208404	0.000623166822348738	6819	tags=68%, list=33%, signal=45%	9554/2921/29108/3297/4792/3606/3569/58484/3329/23786/51128/7100/2919/836/5970/3303/10767/3304/81876/841/3305/4790/7124/3312/718/834/3592/7099/4615/840/929/7415/2920/3576/3553/7097/3684/3689
hsa05120	Epithelial cell signaling in Helicobacter pylori infection	68	-0.552639435065814	-1.6792332468726	5.54989912151987e-05	0.000288947128866431	0.000153004737686011	5661	tags=54%, list=28%, signal=40%	526/50617/6416/10392/537/90423/529/9114/2919/523/1839/836/50848/5970/8517/1956/102/51606/6714/3551/1445/533/9550/4790/9020/6868/528/2920/3576/525/6352/10312/5058/4067/1432/245973/5603
hsa04216	Ferroptosis	39	-0.553237171685663	-1.5929916643157	0.00477355898616786	0.0146329658641407	0.00774852171881649	6676	tags=67%, list=33%, signal=45%	2181/246/81631/5093/64116/23657/10533/23516/10162/7419/2495/2937/9474/2180/6520/51703/2730/3162/4891/7037/2729/6303/1356/1536/55240/30061
hsa04625	C-type lectin receptor signaling pathway	98	-0.554153908744579	-1.72174098039869	5.09146201969878e-07	4.174998856153e-06	2.21076640329026e-06	5458	tags=54%, list=27%, signal=40%	51561/4775/4772/3586/114548/9261/602/868/10379/5293/2207/26253/5970/8517/1959/23365/6361/8915/6714/3551/4893/3845/5290/4773/841/3709/1263/4046/5595/4790/5580/7124/6850/9020/9641/834/5291/1540/64170/3592/6773/1960/207/3659/3553/6772/5058/64581/1432/8503/3710/51806/5603
hsa05235	PD-L1 expression and PD-1 checkpoint pathway in cancer	88	-0.563146161219617	-1.74087760794062	1.68896909467425e-06	1.15412888136073e-05	6.11140132941339e-06	5465	tags=56%, list=27%, signal=41%	1950/1460/7535/4775/4772/10125/2353/3460/7189/5293/5970/8517/1956/3551/919/5133/4893/114609/3845/5777/5290/4773/5604/5595/4790/917/29126/2475/920/5291/4794/3716/6774/3932/916/7099/4615/915/207/3717/3459/116071/148022/10538/7097/6772/1432/8503/5603
hsa04621	NOD-like receptor signaling pathway	156	-0.563238676597962	-1.78627643246255	1e-10	2.73333333333333e-09	1.44736842105263e-09	4738	tags=54%, list=23%, signal=42%	7189/140609/3455/2919/55669/10379/55072/9051/7419/51135/54822/56919/6885/8767/5586/331/5970/8517/79792/3326/23710/257397/9474/23118/3551/29110/10628/7531/24145/7187/7186/7295/841/3709/1673/5595/4790/3454/5580/5331/1508/7124/10135/8772/330/9641/834/11035/3665/51393/84674/64170/3716/7099/4615/6773/10010/2920/3320/3576/1535/8737/148022/7128/7226/5330/3553/3428/79184/79671/6352/2634/115362/6772/2633/…
hsa04650	Natural killer cell mediated cytotoxicity	101	-0.563742767585762	-1.75520471606829	2.18823497217123e-07	1.99372519686712e-06	1.05572739885454e-06	5434	tags=52%, list=26%, signal=39%	259197/7535/4772/6655/356/3460/7305/3455/80328/5293/836/2207/369/2885/2185/3383/79465/3002/919/4893/3845/5777/5290/4773/5604/5595/3454/7124/6850/8797/5291/5551/962/3932/3937/7409/3459/100507436/3683/7410/637/3135/5058/3105/3689/2214/3133/8503/10451/3106/3107/4277/8743
hsa00600	Sphingolipid metabolism	41	-0.565197504226348	-1.63900522708583	0.00118415979576865	0.00441368651150134	0.00233715749164866	5560	tags=59%, list=27%, signal=43%	2720/6610/29956/259230/2717/123099/9517/5660/6609/55304/253782/2531/57704/410/10825/166929/55331/4758/2629/10558/81537/7357/7368/340485
hsa05142	Chagas disease	98	-0.565334082871817	-1.75647747446488	1.09092735552547e-07	1.05242403709516e-06	5.57284872017654e-07	5704	tags=57%, list=28%, signal=41%	2776/3569/2773/2774/4087/6416/3586/356/2353/3460/7189/7046/2767/5293/51135/5970/8517/3551/919/5290/841/5595/4790/5331/7124/917/8837/718/8772/5291/7040/3592/916/7099/4615/915/207/3576/3459/148022/10333/712/5519/5330/2769/713/1636/3553/7097/6352/714/3654/5522/1432/8503/5603
hsa04145	Phagosome	142	-0.568760981554386	-1.79659437237145	1.77677798740447e-10	3.88522119912443e-09	2.05732188015254e-09	3446	tags=58%, list=17%, signal=49%	1780/9146/537/5878/90423/1781/22925/529/9114/10383/8411/523/9103/4360/2209/10376/5869/112714/5868/51606/3688/84790/53407/3690/5289/2213/653361/8685/4689/1783/949/533/9550/1514/718/4481/1778/4688/528/7037/83547/7099/2212/929/3920/4074/11151/1535/78989/10333/525/4973/113457/7097/3684/3127/3135/3115/10312/3105/64581/3689/2214/3685/1520/3133/3112/245973/3134/3119/1536/3117/3106/3107/3123/3108/3113/31…
hsa04657	IL-17 signaling pathway	83	-0.571187848765911	-1.75144115576474	1.0447147863408e-06	7.78787386181323e-06	4.12387415660842e-06	4776	tags=55%, list=23%, signal=43%	2353/7189/2919/8061/5597/9618/836/6885/23765/5970/8517/84818/3326/6361/29761/257397/27189/23118/3551/29110/7187/7186/55540/841/1673/5595/4790/7124/8772/9641/6364/2920/3320/3576/7128/727897/3553/132014/4318/1432/6278/6279/3627/6280/3934/5603
hsa04613	Neutrophil extracellular trap formation	102	-0.573251264365123	-1.78592996233714	4.36542017088723e-08	4.61889618080972e-07	2.44582114837485e-07	4071	tags=48%, list=20%, signal=39%	5293/10014/7419/2209/6885/10105/5970/79792/79885/6714/728/7450/9734/3690/653361/8520/27180/5290/4689/5604/1184/5595/4790/5331/6850/718/2357/834/2475/5291/51284/4688/7099/2212/207/1535/3683/2359/5330/7097/3684/64581/3689/2214/6404/1432/8503/1536/5603
hsa04664	Fc epsilon RI signaling pathway	60	-0.573588860120345	-1.72589715916823	1.6954284506381e-05	9.93036663945172e-05	5.25837771344523e-05	2963	tags=42%, list=14%, signal=36%	5293/2207/2885/4893/3845/5290/5604/5595/7124/6850/3635/5291/695/3937/207/7409/7410/9846/240/4067/1432/8503/241/10451/5603
hsa01212	Fatty acid metabolism	51	-0.577954993833868	-1.71655838609437	0.0001038669794558	0.000516187413053066	0.000273334156462632	3743	tags=47%, list=18%, signal=39%	6785/31/37/5538/2180/38/79966/51703/51/9374/6319/1962/6342/39/8310/2194/7923/64834/83401/3033/1374/60481/35/1376
hsa05162	Measles	122	-0.582397079596863	-1.82909098490557	4.79823313629325e-10	8.74344704835658e-09	4.62987407887945e-09	4776	tags=57%, list=23%, signal=44%	356/2353/7189/868/3455/3559/4478/10379/6776/5293/836/51135/6885/5970/8517/3303/4600/3552/3304/23118/3551/29110/2213/7187/5290/1017/841/7161/3305/4790/3454/917/3312/8772/9641/5291/3665/51284/103/5610/9134/3716/6774/3592/916/7099/4615/6773/915/207/4179/637/7128/3561/896/9367/3553/7097/578/3560/6772/3654/23586/4599/8503/4938/64135/4940/4939
hsa03030	DNA replication	36	-0.582533970245371	-1.65415883536515	0.00114190903446034	0.00431996819325915	0.00228753129617381	5489	tags=53%, list=27%, signal=39%	5982/57804/56655/5426/4174/5985/6117/5558/5422/4171/5981/4173/23649/4175/2237/4172/5557/54107/10714
hsa04380	Osteoclast differentiation	124	-0.584017217333378	-1.83454466240786	3.49218532496301e-10	6.73786345051686e-09	3.56786735986933e-09	4776	tags=57%, list=23%, signal=44%	2353/3460/7189/7305/3455/7006/8061/10379/7046/2274/9103/5293/8878/2209/2885/6885/5970/8517/55423/10288/2355/3552/23118/3551/3690/6688/2213/653361/29760/8792/5290/4689/7186/5468/4773/5604/5595/4790/3454/7124/6850/9020/10859/5291/695/1540/7040/4688/3716/3932/126014/3937/6773/54209/2212/1435/11006/207/1535/3459/9846/3553/54/1436/6772/8651/4982/2214/1432/8503/5603
hsa05323	Rheumatoid arthritis	85	-0.58621268842062	-1.80450893590737	1.49339446840649e-07	1.39952395896379e-06	7.41082969284421e-07	2339	tags=45%, list=11%, signal=40%	533/9550/1514/7124/1493/4050/7040/6364/10673/528/7099/1435/2920/3576/3600/3683/942/525/3553/7097/54/6352/3127/3115/10312/3689/3112/245973/8741/3119/3117/3123/3108/3113/3109/3122/3111/3118
hsa05133	Pertussis	72	-0.58678534146884	-1.78904039866244	3.58016649387092e-07	3.01101182048631e-06	1.59440613087369e-06	5763	tags=61%, list=28%, signal=44%	6372/3569/6374/2773/51561/3586/114548/10392/2353/7189/836/51135/722/5970/3688/3552/114609/5595/4790/7124/718/834/3592/7099/4615/840/929/3576/717/148022/3394/712/3659/713/3553/3684/714/3654/3689/1432/720/721/51806/5603
hsa04610	Complement and coagulation cascades	68	-0.598207828839839	-1.8176959713483	1.10207247465e-06	8.0328838152267e-06	4.25361306005265e-06	4883	tags=47%, list=24%, signal=36%	5104/2161/3075/2157/9002/1675/722/728/7450/1604/3426/966/11326/7056/718/3687/4179/717/5345/2152/712/719/713/3684/714/3689/730/2/720/629/721/5265
hsa05152	Tuberculosis	159	-0.600856749735449	-1.90819584326026	1e-10	2.73333333333333e-09	1.44736842105263e-09	5148	tags=59%, list=25%, signal=45%	3586/4802/537/5878/3329/3460/7189/22925/9114/8411/1594/1509/9103/836/2207/51135/4360/2209/26253/2033/8767/5970/5869/5868/3588/23365/8915/51606/6714/3552/5289/2213/114609/841/1263/533/4046/5595/4790/7124/6850/718/8772/3687/4800/7040/5993/972/64170/3716/3592/7099/4615/2212/929/207/3920/3717/11151/3459/10333/637/3587/3656/843/3553/7097/3684/3127/3115/6772/10312/3654/7421/7096/64581/3689/2214/64127/1…
hsa01040	Biosynthesis of unsaturated fatty acids	22	-0.602520894395995	-1.58064554394846	0.00443366117539652	0.0138499130050482	0.00733387562847545	3743	tags=55%, list=18%, signal=45%	6785/641371/79966/51/6319/6342/10965/8310/122970/64834/83401/60481
hsa05164	Influenza A	148	-0.603675638702585	-1.90780247963138	1e-10	2.73333333333333e-09	1.44736842105263e-09	4174	tags=55%, list=20%, signal=44%	56000/5293/836/3836/51135/2033/7113/5970/8517/3838/4600/3383/3552/3551/29110/4928/7706/7187/23633/5290/841/5604/5595/4790/3454/7124/8797/8766/8772/9641/834/5291/3665/51284/103/7098/5610/90865/3716/3592/7099/4615/6773/5371/207/3717/3576/3459/148022/637/896/3553/79671/6352/578/3127/3115/91543/6772/55916/23586/3112/4599/8503/4938/3119/3117/64135/4940/56649/3123/4939/3108/3113/3109/3122/8743/4261/311…
hsa05169	Epstein-Barr virus infection	184	-0.610693036109121	-1.96051966972105	1e-10	2.73333333333333e-09	1.44736842105263e-09	4071	tags=52%, list=20%, signal=42%	5293/836/51135/5700/5718/6885/5970/8517/5717/3383/10213/23118/3551/919/29110/29760/7187/5290/7186/1017/1870/5713/5708/841/4790/3454/7124/6850/9020/917/8772/864/9641/25942/5291/3665/695/4609/10018/4794/5610/1643/9134/960/3716/6774/1871/916/890/4615/6773/915/207/8737/3683/637/7128/567/896/7097/9636/965/578/3127/3135/3115/6892/6772/1026/3654/4067/3105/23586/1432/3133/3112/8503/3134/4938/3119/3117/49…
hsa00062	Fatty acid elongation	23	-0.611747177703465	-1.62270535407847	0.00290905159110235	0.00963806991799565	0.00510359928263569	3743	tags=48%, list=18%, signal=39%	6785/5538/641371/9374/284486/10965/122970/64834/83401/3033/60481
hsa05145	Toxoplasmosis	107	-0.612443998797557	-1.91364302026356	1e-10	2.73333333333333e-09	1.44736842105263e-09	3732	tags=52%, list=18%, signal=43%	836/51135/6885/10105/331/5970/8517/3303/23533/3588/3688/3304/23118/3551/5294/10319/841/3305/5595/4790/7124/3949/3312/330/7040/3716/6774/3592/7099/4615/207/3717/1234/3459/3587/7097/240/3127/3115/3655/6772/8651/3654/1432/3112/3119/3117/3123/3108/3113/3109/3122/4261/3111/3118/5603
hsa04620	Toll-like receptor signaling pathway	88	-0.618632229252454	-1.91240404289286	1.18754448137749e-09	1.94757294945909e-08	1.03128862856466e-08	4776	tags=62%, list=23%, signal=48%	2353/7189/51311/388372/3455/7100/5293/51135/6885/5970/8517/6351/1326/23118/3551/29110/114609/7187/5290/3663/841/5604/5595/4790/3454/7124/8772/6696/9641/5291/3665/51284/7098/3592/7099/4615/929/207/3576/8737/942/148022/10333/3553/7097/6352/6772/3654/7096/1432/8503/6373/4283/3627/5603
hsa04658	Th1 and Th2 cell differentiation	84	-0.619018534808265	-1.90116994023962	2.14339224511831e-09	3.05666372347307e-08	1.61857995626783e-08	5379	tags=62%, list=26%, signal=46%	3516/7535/182/4775/4772/2353/3460/3595/3559/6776/4853/5970/8517/84441/3551/919/4773/5595/4790/917/864/3594/920/6778/4794/3714/3716/3592/3932/916/4851/915/3717/3459/3561/3127/3560/3115/6772/3566/1432/3112/3119/3117/3123/3108/3113/3109/3122/3111/3118/5603
hsa04978	Mineral absorption	53	-0.629637676715017	-1.87175920292723	1.78875404643548e-06	1.19737005557314e-05	6.34037417103876e-06	2758	tags=47%, list=13%, signal=41%	54822/2495/79901/483/55503/538/3162/4494/4891/261729/10568/7779/4501/26872/115019/4502/1317/7421/4489/4493/6523/30061/4499/4496/4495
hsa05340	Primary immunodeficiency	32	-0.629723146318339	-1.75091934091501	0.000231807838988445	0.0010708869181438	0.000567061429697456	4014	tags=53%, list=20%, signal=43%	7374/8517/29851/29760/925/84876/920/695/5993/3932/916/915/5788/3561/6891/4261/6890
hsa04640	Hematopoietic cell lineage	85	-0.638765174689843	-1.96627860236146	1.34890993748214e-10	3.36648349622739e-09	1.78263728137843e-09	3123	tags=48%, list=15%, signal=41%	3552/951/3690/3676/1604/966/925/921/7124/917/1438/920/7037/960/916/1435/915/929/3570/3553/3684/914/3127/3115/1436/952/3655/1441/924/3566/3112/3119/3117/290/3123/3108/3113/3109/3122/3111/3118
hsa04659	Th17 cell differentiation	98	-0.64080289568684	-1.99095700391552	1e-10	2.73333333333333e-09	1.44736842105263e-09	3724	tags=56%, list=18%, signal=46%	6256/5970/8517/50615/3326/4089/3551/919/4773/50943/5595/4790/917/6097/4088/2475/3594/920/6778/4794/7040/3716/6774/3932/916/915/196/6257/3556/10148/3320/3717/3459/3561/3570/3553/3127/861/3560/3115/6772/3566/9466/1432/3112/3119/3117/3123/3108/3113/3109/3122/3111/3118/5603
hsa00650	Butanoate metabolism	23	-0.661532722951972	-1.75476525361695	0.000481846287430123	0.00210727443036107	0.0011158545603645	3997	tags=48%, list=19%, signal=39%	2571/3157/65985/5019/38/1962/39/3033/35/7915/3158
hsa00533	Glycosaminoglycan biosynthesis - keratan sulfate	14	-0.670564723925469	-1.62523920353937	0.00568967533302263	0.0165151637985082	0.00874519264041671	3986	tags=57%, list=19%, signal=46%	8702/8534/93010/8704/4166/10678/10164/2683
hsa04622	RIG-I-like receptor signaling pathway	52	-0.676434027756122	-2.00844190459818	1.99171140778724e-08	2.41956052501561e-07	1.28121786465846e-07	3732	tags=60%, list=18%, signal=49%	6885/5970/8517/1654/9474/3551/29110/7706/7187/7186/841/4790/7124/8772/9641/3665/1540/3592/10010/3576/8737/843/54941/79132/9636/79671/23586/1432/64135/3627/5603
hsa00601	Glycosphingolipid biosynthesis - lacto and neolacto series	25	-0.683227283769757	-1.83124075453211	7.79391084473599e-05	0.00039943793079272	0.000211512383121947	5009	tags=68%, list=24%, signal=51%	79369/10402/8702/2526/6484/8704/10317/10678/2525/28/84002/2651/8706/53947/2683/2524/10331
hsa05416	Viral myocarditis	55	-0.684673495035106	-2.04238084360869	1.88559607879469e-09	2.94512149449837e-08	1.55951555389034e-08	1775	tags=44%, list=9%, signal=40%	5551/1981/3683/942/637/3127/3135/3115/3105/3689/3133/3112/3134/3119/3117/3106/3107/3123/3108/3113/3109/3122/3111/3118
hsa05321	Inflammatory bowel disease	53	-0.68740258111213	-2.04348017104909	3.80541078384237e-09	4.80067206577038e-08	2.54207602969227e-08	2319	tags=57%, list=11%, signal=50%	50943/4790/7124/6097/4088/3594/6778/7040/6774/3592/7099/3459/3561/3553/7097/3127/3115/6772/3566/64127/3112/3119/3117/3123/3108/3113/3109/3122/3111/3118
hsa05140	Leishmaniasis	72	-0.689221749017706	-2.10135711560705	1e-10	2.73333333333333e-09	1.44736842105263e-09	4122	tags=68%, list=20%, signal=55%	9103/51135/2209/6885/5970/3688/3552/23118/653361/3676/5777/4689/5595/4790/7124/718/2002/7040/4688/3716/3592/7099/4615/2212/3717/1535/3459/3553/7097/3684/3127/3115/6772/3654/3689/2214/1432/3112/3119/1536/3117/3123/3108/3113/3109/3122/3111/3118/5603
hsa00515	Mannose type O-glycan biosynthesis	18	-0.693831355973825	-1.76031099661691	0.000312745562174189	0.00140521293689225	0.00074409542550456	3731	tags=50%, list=18%, signal=41%	2526/55624/2218/8704/148789/146664/10585/84197/2683
hsa04672	Intestinal immune network for IgA production	39	-0.719950074186199	-2.07302496216525	3.56721576557437e-08	3.90015590369464e-07	2.06523018006937e-07	1655	tags=56%, list=8%, signal=52%	9020/7040/56477/10673/3695/3600/3601/942/3127/3115/3112/8741/3119/3117/5284/3123/3108/3113/3109/3122/3111/3118
hsa04612	Antigen processing and presentation	61	-0.726400294686264	-2.18533824578505	1e-10	2.73333333333333e-09	1.44736842105263e-09	3561	tags=69%, list=17%, signal=57%	3303/5721/3326/3304/10437/5641/925/3305/1508/1514/7124/3312/4800/920/5993/972/3309/3320/567/3127/3135/3115/6892/3105/1520/3133/3112/3134/3119/3117/3106/3107/3123/3108/3113/3109/3122/6891/4261/3111/3118/6890
hsa05322	Systemic lupus erythematosus	46	-0.730962102207376	-2.1474968523103	2.6997509169744e-10	5.53448937979752e-09	2.93065066645248e-09	2410	tags=54%, list=12%, signal=48%	81/7124/718/2212/717/942/712/713/3127/3115/714/2214/730/3112/3119/720/3117/721/3123/3108/3113/3109/3122/3111/3118
hsa05150	Staphylococcus aureus infection	61	-0.740012049022884	-2.22628851461292	1e-10	2.73333333333333e-09	1.44736842105263e-09	2567	tags=64%, list=13%, signal=56%	3426/1673/3860/718/2357/3880/1672/2212/717/3683/5724/712/2359/719/713/3684/3861/3127/3115/714/3866/3689/2214/6404/3112/3119/720/3117/629/721/3123/25984/3108/3113/3109/3122/3868/3111/3118
hsa04940	Type I diabetes mellitus	37	-0.750947884086247	-2.14539920586976	2.27409867672811e-09	3.10793485819509e-08	1.64572930552692e-08	2159	tags=70%, list=11%, signal=63%	3002/3552/4049/7124/5551/3592/942/3553/3127/3135/3115/3105/3133/3112/3134/3119/3117/3106/3107/3123/3108/3113/3109/3122/3111/3118
hsa05320	Autoimmune thyroid disease	32	-0.797364229068237	-2.21703848523235	1.43691368741413e-10	3.36648349622739e-09	1.78263728137843e-09	1007	tags=59%, list=5%, signal=57%	942/3127/3135/3115/3105/3133/3112/3134/3119/3117/3106/3107/3123/3108/3113/3109/3122/3111/3118
hsa05332	Graft-versus-host disease	32	-0.804780930419773	-2.23766031868109	1e-10	2.73333333333333e-09	1.44736842105263e-09	1007	tags=62%, list=5%, signal=60%	942/3553/3127/3135/3115/3105/3133/3112/3134/3119/3117/3106/3107/3123/3108/3113/3109/3122/3111/3118
hsa05330	Allograft rejection	31	-0.809087940678747	-2.24259370697715	1e-10	2.73333333333333e-09	1.44736842105263e-09	2159	tags=71%, list=11%, signal=64%	7124/5551/3592/942/3127/3135/3115/3105/3133/3112/3134/3119/3117/3106/3107/3123/3108/3113/3109/3122/3111/3118
hsa05310	Asthma	21	-0.849729898138707	-2.2143026892424	2.40922966489378e-09	3.16090932034064e-08	1.67378060929463e-08	538	tags=57%, list=3%, signal=56%	3127/3115/3112/3119/3117/3123/3108/3113/3109/3122/3111/3118
