# Supplementary material for: Identifying the Role of Oxidative Stress-Related Genes as Prognostic Biomarkers and Predicting the Response of Immunotherapy and Chemotherapy in Ovarian Cancer
Source: Oxid Med Cell Longev. 2022 Dec 12;2022:6575534. doi: 10.1155/2022/6575534 (PMC9764017; doi:10.1155/2022/6575534)
Supplement: Supplementary 12 — Supplement Table 11: signaling pathway analysis in regard to OGG1. [file 6575534.f12.txt]

ID	Description	setSize	enrichmentScore	NES	pvalue	p.adjust	qvalues	rank	leading_edge	core_enrichment
hsa00512	Mucin type O-glycan biosynthesis	31	0.511732501794942	2.08286697235666	0.000131703642352241	0.00424085728374216	0.00332724991205661	1223	tags=29%, list=6%, signal=27%	10331/55808/10610/9245/79695/11226/2591/50614/51301
hsa00140	Steroid hormone biosynthesis	34	0.460652027600458	1.93507126133805	0.000452095099994253	0.0114647597401491	0.00899490793604379	1522	tags=32%, list=7%, signal=30%	6820/1545/7364/79644/1583/1577/8644/3284/1544/3293/6716
hsa05332	Graft-versus-host disease	32	0.425536213875133	1.7277541737468	0.00261177206961703	0.0400471717341278	0.0314198143713327	2025	tags=41%, list=10%, signal=37%	3106/3107/3112/3134/3105/3135/3552/3569/3002/3133/3108/7124/3123
hsa04612	Antigen processing and presentation	61	0.415779004815103	1.91655552374177	6.20953190405459e-05	0.00249933659138197	0.00196090481180671	2057	tags=43%, list=10%, signal=38%	3303/6891/3106/6890/3107/6892/3112/5721/3134/3320/3105/3135/567/5720/3133/926/1520/3108/3304/972/3309/2923/3306/7124/3123/821
hsa05150	Staphylococcus aureus infection	61	0.397761068270368	1.83350088314827	0.00015693070572589	0.00459378974943061	0.00360415017935059	1082	tags=23%, list=5%, signal=22%	1672/25984/3868/717/629/1673/3872/3880/3112/3875/3861/3860/820/5724
hsa04061	Viral protein interaction with cytokine and cytokine receptor	90	0.385988381582072	2.10484747531813	9.93376745621013e-06	0.000799668280224915	0.000627395839339587	1997	tags=29%, list=10%, signal=26%	6373/6364/53832/2919/3627/3606/6374/8743/6363/8740/3561/3569/2920/6376/9547/5196/6352/3579/2921/3577/6367/4055/3572/3588/1236/7124
hsa04657	IL-17 signaling pathway	83	0.335391103613292	1.77507996044397	0.000891368216202847	0.0204532193228701	0.0160469847580543	888	tags=22%, list=4%, signal=21%	3934/6279/6280/1673/6364/6278/727897/2919/3627/8061/6374/3320/2353/7128/4322/3569/4792/2920
hsa04150	mTOR signaling pathway	147	-0.418948628128859	-1.37522311158073	0.0030584599242634	0.0447647316187644	0.0351210709006324	6425	tags=44%, list=31%, signal=31%	84335/5291/81617/153129/6446/6199/23175/10670/5562/54361/81929/526/5595/7483/8321/253260/3643/7248/5290/7482/387/8322/10000/201163/92335/389541/83667/1857/8408/6194/9706/1978/4893/8324/5578/3551/1855/4041/9681/2475/2887/208/6195/79726/10641/8131/6502/80326/9663/3480/1856/7249/534/84219/64900/3667/9675/64223/5293/6396/9894/7481/2535/5894/7475
hsa05206	MicroRNAs in cancer	189	-0.432915986994791	-1.4425807898448	0.000125960167947812	0.00424085728374216	0.00332724991205661	4353	tags=35%, list=21%, signal=28%	442891/472/5290/4855/1944/7431/4194/10298/406896/5155/387/406992/10018/442903/7329/7148/2064/406900/4893/407032/5292/1387/1399/1946/2146/5578/3551/993/1945/407011/3065/898/9134/9759/25/4854/2475/3236/113130/3162/672/1788/10014/994/5159/407019/4318/995/1029/3667/90427/1870/11186/8091/5598/7078/5293/23414/1869/131405/407014/6624/5335/4609/5894/3925
hsa03013	Nucleocytoplasmic transport	101	-0.45535878123881	-1.46003208841976	0.000952789720009476	0.0204532193228701	0.0160469847580543	6734	tags=56%, list=33%, signal=38%	3839/8021/26019/23214/9670/11269/23039/4927/81929/9688/3842/7175/55308/22916/11260/4928/5901/29107/5905/59343/51194/55916/10073/57122/2733/23165/9984/7514/79902/10482/30000/3843/10250/23511/4686/7329/9972/100101267/348995/8480/79228/53371/55706/55746/23279/7919/55705/57510/22794/1434/1915/9883/9631/8563/10921/6396/23225
hsa04360	Axon guidance	172	-0.460835220797265	-1.52746116737748	2.02457452963988e-05	0.00108652166424007	0.000852452433532583	6036	tags=47%, list=29%, signal=33%	55558/84448/6259/8633/5534/54361/4690/54961/818/1969/5595/6585/2242/2771/5336/64221/5998/5290/1944/10298/387/57556/5921/57715/5361/8829/2047/56963/9353/6387/5532/2049/56288/4893/7220/10154/1946/4636/5578/9423/4775/10398/1945/2051/6091/6586/3688/5727/84552/6714/25/5590/2770/10505/54910/23380/7869/9037/50855/80031/285220/25791/1808/3611/57689/6608/2048/5364/91653/5881/9901/5293/5335/4776/6405/4917/…
hsa04914	Progesterone-mediated oocyte maturation	91	-0.467507316581918	-1.48985423700872	0.00162696837732777	0.0276685179676212	0.02170789248849	5746	tags=49%, list=28%, signal=36%	699/3326/132864/1432/5595/441273/2771/8881/729597/891/6790/5567/5290/5602/4085/10000/983/51343/29945/29882/51433/8697/25906/890/9133/107/64682/993/441272/2770/208/113/5347/6195/1017/112/3835/994/995/3480/10459/9088/5293/109/5894
hsa04540	Gap junction	77	-0.476042388481399	-1.49740304574041	0.00208465224549496	0.0335629011524688	0.0263324494167784	5542	tags=38%, list=27%, signal=28%	5330/5595/5593/2771/5331/3710/5567/5607/5155/983/4893/107/5578/84617/6714/2770/113/7280/203068/112/5159/3708/10376/347733/7846/5598/109/10382/5894
hsa04110	Cell cycle	126	-0.488917366425561	-1.59074270957688	2.39717549190112e-05	0.00110270072627452	0.000865146042189878	6020	tags=56%, list=29%, signal=40%	1871/902/8243/699/5934/990/7040/1874/1021/8881/1027/891/23595/7027/4173/472/5885/1875/4085/983/51343/29945/29882/51433/4089/8697/11200/25906/890/9133/991/1387/64682/7029/993/1111/3065/898/9134/8317/25/7709/9700/5347/7272/1017/4998/994/6502/4174/10971/896/10274/8318/995/5933/1019/1029/10459/9088/5111/4175/701/1028/1870/4172/4176/1869/4609/4171
hsa00310	Lysine degradation	55	-0.514779180572108	-1.55328658283669	0.00163261441423852	0.0276685179676212	0.02170789248849	5361	tags=53%, list=26%, signal=39%	51166/501/8985/56950/79709/1743/38/85007/29072/3033/9739/9757/39/1962/2146/3030/5351/7799/219/10919/224/84444/55526/10157/2639/2145/9869/79723/6419
hsa03420	Nucleotide excision repair	45	-0.556531777381724	-1.64506418295902	0.000462862970875587	0.0114647597401491	0.00899490793604379	6769	tags=67%, list=33%, signal=45%	1161/2965/6119/1643/902/2067/728340/2068/54107/2072/8451/5425/56655/10714/1642/2968/5982/5985/5981/2071/5427/5983/6117/5984/5426/6118/3978/5111/5424/7508
hsa03440	Homologous recombination	37	-0.571046152823608	-1.63832256837238	0.00119104129504034	0.0225597233531169	0.0176996848798564	6868	tags=65%, list=33%, signal=43%	5890/29086/6119/7516/5892/51720/580/472/5425/10714/7517/5932/79728/80198/83990/146956/11073/672/6117/7156/6118/5888/8438/5424
hsa00970	Aminoacyl-tRNA biosynthesis	25	-0.620923249840847	-1.69005043298747	0.00118528474237754	0.0225597233531169	0.0176996848798564	4399	tags=64%, list=21%, signal=50%	23438/283459/124454/2193/57038/79731/5188/57505/51091/55157/57176/25973/10667/80222/54938/23395
hsa03460	Fanconi anemia pathway	47	-0.622402292015209	-1.84556980546411	4.45619589921579e-06	0.000478298359849162	0.000375258602039225	2789	tags=57%, list=14%, signal=50%	84464/80010/79728/80198/83990/146956/5429/5395/51455/22909/197342/672/57599/55120/6117/116028/29089/2175/7156/6118/2178/5888/2176/4292/9894/2189/2177
hsa03410	Base excision repair	33	-0.650965029179078	-1.839499622744	1.95821468904712e-05	0.00108652166424007	0.000852452433532583	3865	tags=58%, list=19%, signal=47%	10039/5425/56655/10714/4595/27343/55247/3980/5427/142/252969/4913/4350/7374/5426/3978/5111/5424/4968
hsa03030	DNA replication	36	-0.689159659732746	-1.97260415257409	2.33567754248865e-07	7.52088168681345e-05	5.90065905470817e-05	3783	tags=69%, list=18%, signal=57%	5425/56655/10714/5982/10535/5985/5981/5558/5427/23649/1763/5983/6117/5984/4174/5557/5426/6118/3978/5111/4175/4172/4176/5424/4171
hsa03430	Mismatch repair	23	-0.74867556300535	-1.99469648706154	9.82864999158539e-07	0.000158241264864525	0.000124151368314763	3783	tags=74%, list=18%, signal=60%	5425/10714/5982/5985/5981/5395/5983/6117/5984/4436/9156/6118/3978/2956/5111/4292/5424
