# Supplementary material for: Identifying the Role of Oxidative Stress-Related Genes as Prognostic Biomarkers and Predicting the Response of Immunotherapy and Chemotherapy in Ovarian Cancer
Source: Oxid Med Cell Longev. 2022 Dec 12;2022:6575534. doi: 10.1155/2022/6575534 (PMC9764017; doi:10.1155/2022/6575534)
Supplement: Supplementary 13 — Supplement Table 12: signaling pathway analysis in regard to PLA2R1. [file 6575534.f13.txt]

ID	Description	setSize	enrichmentScore	NES	pvalue	p.adjust	qvalues	rank	leading_edge	core_enrichment
hsa03030	DNA replication	36	0.744138583884464	3.02236978378952	1e-10	2.43846153846154e-09	8.34008097165992e-10	2895	tags=64%, list=14%, signal=55%	10535/5111/1763/5984/4176/6119/4171/6742/5427/5557/84153/4172/5982/5425/23649/56655/4173/2237/5985/4175/5558/6118/4174
hsa03050	Proteasome	43	0.582789003485037	2.48362188863225	2.25648159406059e-07	1.49021805274418e-06	5.09687728482984e-07	4711	tags=65%, list=23%, signal=50%	5683/5691/5685/5694/5693/11047/51371/5689/5704/5702/5684/5714/5692/5721/5688/5682/5686/5695/5715/5705/5719/5710/9491/5690/3458/5718/5720/5687
hsa03410	Base excision repair	33	0.543748999340755	2.14341968169274	8.90449076157549e-05	0.000288033017491778	9.85137001549168e-05	1941	tags=39%, list=9%, signal=36%	5111/4913/4595/55247/328/7374/5427/23583/5425/56655/5423/2237/10038
hsa03430	Mismatch repair	23	0.539207126689974	1.95923382353343	0.00138895727760564	0.00328581684329096	0.00112382246342012	2812	tags=39%, list=14%, signal=34%	5111/5984/9156/6119/6742/5982/5425/5985/6118
hsa00670	One carbon pool by folate	19	0.469613400409782	1.65472119310117	0.0218626716619336	0.036096181858505	0.0123456972652366	1841	tags=26%, list=9%, signal=24%	7298/6472/10797/1719/441024
hsa03440	Homologous recombination	37	0.458908549891283	1.86346644610666	0.000662948878552199	0.00175128995417539	0.000598980127112952	2812	tags=35%, list=14%, signal=30%	146956/5888/641/6119/29086/6742/8438/25788/5425/5889/83990/7516/6118
hsa00790	Folate biosynthesis	21	0.455669186688857	1.64192577466468	0.0115656173156458	0.0209502896517699	0.00716546516397907	965	tags=19%, list=5%, signal=18%	249/8836/1719/5805
hsa03008	Ribosome biogenesis in eukaryotes	74	0.431175748929617	2.00527414032187	6.51565478129889e-06	2.79116562928615e-05	9.54640743205955e-06	2010	tags=30%, list=10%, signal=27%	1460/55505/51367/29107/6023/2091/10248/100169760/3692/5901/10528/10556/10799/55272/10436/55651/54913/54433/138716/780852/10557/27341
hsa03020	RNA polymerase	30	0.41375905215322	1.62387378876771	0.0189166292773051	0.0320256356177213	0.0109534798891758	1153	tags=23%, list=6%, signal=22%	51728/5441/5438/5437/5439/5436/9533
hsa00970	Aminoacyl-tRNA biosynthesis	25	0.412609251474281	1.55235211665035	0.0279417045245977	0.0445101524336557	0.015223462396369	3105	tags=32%, list=15%, signal=27%	54938/2193/79731/5188/118672/10667/57176/10056
hsa03460	Fanconi anemia pathway	47	0.383891933835349	1.74337488789123	0.00469568971033425	0.00930333523859974	0.00318194763266071	3283	tags=34%, list=16%, signal=29%	29089/116028/146956/5888/641/55215/6119/3280/5889/2189/2175/83990/6118/2177/2178/2187
hsa00983	Drug metabolism - other enzymes	58	0.310124141867691	1.37468860010931	0.0264344510184541	0.0427536784329079	0.0146227092099934	995	tags=21%, list=5%, signal=20%	4830/7367/7083/6241/1854/4831/3704/2950/4833/4258/119391/654364
hsa04260	Cardiac muscle contraction	71	0.294552382975797	1.3850703994022	0.0148791743266238	0.0259159245139547	0.00886382276253471	2288	tags=31%, list=11%, signal=28%	7137/1347/341947/1337/27089/1329/482/1350/10975/9377/1340/1351/9254/29796/1349/487/9167/84701/1327/481/440567/1345
hsa05203	Viral carcinogenesis	161	-0.406656670855781	-1.28873488287459	0.024975024975025	0.0408097057581594	0.0139578273056298	5022	tags=36%, list=24%, signal=27%	1654/79885/3107/1642/10013/2965/3516/3718/5594/5829/7533/5966/9261/1233/7185/2033/23352/5567/5922/7187/4790/6722/3106/10014/81/6672/8717/1386/3133/1387/2934/4067/5293/9759/6774/1021/8850/6777/1234/1026/3725/7188/894/595/87/5291/6776/5934/64764/5925/5295/3716/3572/1030/1959/90993/1960/718
hsa04218	Cellular senescence	152	-0.413909273945656	-1.30718910790869	0.0169722605500448	0.0289258419051839	0.00989328147512515	6162	tags=48%, list=30%, signal=34%	3134/776/3364/5290/2309/3576/4087/545/2626/7248/5533/10758/208/8945/5603/8878/4088/4775/3107/1432/5606/472/5594/54822/9261/2475/28996/5530/4776/4790/1647/23291/3106/823/7046/3708/3133/5728/4609/204851/5293/7042/1021/10114/3569/51806/1026/894/2308/2113/3486/59341/595/5291/7043/5934/5925/5295/22808/678/4773/677/3709/824/3710/4772/1030/7040/10000/4616/7048/83593/5054
hsa05160	Hepatitis C	136	-0.414433704588102	-1.30229522147176	0.0260521042084168	0.0423513694054776	0.0144851105720212	7719	tags=57%, list=38%, signal=36%	4792/3845/4599/7157/27102/4940/207/5894/3551/10197/4938/356/5519/57506/5970/4600/975/5595/100506658/8503/841/5290/9451/637/1499/7122/137075/8554/208/8517/8737/29110/91543/9071/4939/2932/5594/7533/5522/7187/4790/949/317/369/7132/7124/23586/8837/3454/7189/8717/6655/3455/4609/5293/6773/6774/1021/1026/6256/595/5291/7098/5465/5925/148022/10686/5521/5295/3716/9076/9021/3949/6041/355/5010/10000/1956
hsa04150	mTOR signaling pathway	147	-0.418250841525467	-1.31905247032604	0.0126291898495111	0.0224362058742525	0.00767368157080528	5844	tags=44%, list=28%, signal=32%	8408/64121/253260/7248/5579/208/10670/81617/83667/54468/2887/9681/6195/3480/2932/5594/96459/5578/526/57600/2475/58528/27330/64798/11211/51719/6249/245973/5170/7132/7124/528/9706/54541/6655/8140/8322/9663/8325/4041/523/3643/5728/81029/7476/201163/54361/5562/6197/79899/5293/23175/8323/5291/64900/6446/220441/5295/3667/7483/6196/8324/10000/7477/8321
hsa05207	Chemical carcinogenesis - receptor activation	166	-0.422732943972653	-1.34030960606356	0.00874334070676697	0.0162084152283341	0.00554363861370882	3936	tags=36%, list=19%, signal=29%	688/2475/5567/5241/27330/408/4790/2946/596/2247/775/85315/2770/2052/6655/2949/1386/3717/653689/2254/331/1544/196883/6197/4609/114/5293/112/405/6774/196/6777/4257/3725/6256/604/595/5291/1545/113/6776/109/2947/5465/64764/5925/9314/5295/7421/2099/2252/4853/6196/10000/115/367/1956/90993/2353
hsa04152	AMPK signaling pathway	110	-0.431845198618764	-1.33617643306095	0.0292044310171198	0.0462890231621349	0.0158318757619123	6012	tags=45%, list=29%, signal=32%	5290/1938/5527/200186/10645/2309/8408/5529/7248/208/81617/5211/31/3480/5522/5208/5525/2475/2997/51719/23216/5523/5170/3953/51422/32/5526/3643/29904/5565/5562/6319/948/51552/5293/5468/8660/79966/6720/2308/595/5291/5209/64764/5521/5295/2203/3667/10000/90993
hsa04530	Tight junction	154	-0.432110974210114	-1.36476119667815	0.00546559706996485	0.0106950263653016	0.00365793696040533	6409	tags=49%, list=31%, signal=34%	113457/57826/9223/6714/776/3996/912/50848/5906/7122/2626/137075/7430/9181/6093/8189/4214/9693/5584/9071/10096/123720/2017/60/2064/5522/54566/5567/79861/9414/23327/9475/4771/23370/7408/5601/4628/81/51422/909/27134/911/51762/84952/5565/5562/913/4627/4734/79778/79784/7277/8777/58494/7454/3725/10095/83700/4217/57530/595/87/3059/51421/154810/10686/4478/5521/154796/10398/9076/3688/4629/5010/11346/861
hsa05170	Human immunodeficiency virus 1 infection	189	-0.440527852762668	-1.40294118807506	0.00126222499995497	0.00307788711527482	0.00105270587040779	7337	tags=59%, list=36%, signal=38%	6890/207/94235/5894/3551/356/5970/85363/7465/200316/6885/5595/917/91860/8503/8906/2773/3134/841/5290/637/164668/919/8451/2771/5335/545/10681/3984/5533/5579/208/8945/5603/8517/8737/29110/4775/25939/3107/567/1432/1642/51135/5606/2790/472/5594/5829/6891/5747/164/5578/162/2475/5530/8450/4776/4790/5601/23291/3106/1398/2775/5063/2767/2791/596/7132/7124/2770/140564/23118/7189/8717/3708/60489/59345/5336/…
hsa05168	Herpes simplex virus 1 infection	462	-0.44657568691025	-1.45379013349712	1.69670255709161e-07	1.14437172467668e-06	3.91400589877797e-07	8140	tags=59%, list=40%, signal=36%	400720/147923/7249/25888/80778/146540/440275/256051/284323/79744/170959/339327/255403/7633/7694/55900/5371/55659/4792/155061/9310/57474/7565/7157/100289635/7700/51427/57677/27102/9534/4940/163049/92285/388569/79230/6890/163087/90576/207/163255/162963/3551/126295/10482/4938/329/356/57506/641339/163131/5970/147929/51710/6885/6940/57541/127396/29992/7673/7691/7695/7539/155054/91661/125919/7554/90075…
hsa05132	Salmonella infection	244	-0.447308847802747	-1.43790359470919	0.000107837647168648	0.000331888681091858	0.000113513312809103	5751	tags=44%, list=28%, signal=32%	3576/9844/1499/83547/5868/5878/208/26999/5603/5869/10006/8517/8737/27072/1781/23265/79792/6934/1432/51135/5606/10096/5594/6416/60/1778/8795/147700/23191/23339/197259/51209/10787/29109/114609/837/29108/79861/55207/8976/9475/9267/4790/9648/112574/5601/5063/596/6281/7132/7124/23118/7189/64746/8717/4074/5287/330/338382/23643/257397/302/51429/10392/6990/4609/57381/3800/5293/840/3569/5294/8743/388/4615…
hsa04724	Glutamatergic synapse	98	-0.448630068789045	-1.38255955632627	0.0147489313363287	0.0258310012906972	0.00883477713080461	5872	tags=44%, list=29%, signal=31%	8681/5331/2771/10681/5533/5579/1742/2790/9454/50944/5594/6507/5578/5567/5530/2744/2752/2775/2791/775/2770/3708/59345/85358/5330/196883/22941/5338/2786/114/112/2776/113/109/2788/55970/54331/7220/3709/3710/6505/115/2899
hsa05224	Breast cancer	136	-0.448658253882813	-1.40984069016819	0.00391576236244811	0.00800836560578098	0.00273903920768866	3901	tags=35%, list=19%, signal=29%	2475/5241/11211/6667/324/1647/369/8313/2247/6655/4851/8322/8325/2254/4041/2324/5728/81029/7476/8648/54361/4609/6464/5293/26508/1452/1021/8202/1026/3725/8323/595/5291/5925/5295/2099/2252/7483/25759/4853/2246/8324/10000/4616/1956/7477/8321/2353
hsa04550	Signaling pathways regulating pluripotency of stem cells	128	-0.452820504381006	-1.41574631384457	0.00358105004666095	0.00741956120778771	0.00253765500382578	5619	tags=44%, list=27%, signal=32%	1499/4087/5013/208/5603/4088/92/1432/3480/7994/2932/3718/5594/3397/4089/4086/6657/11211/324/8313/2247/90/4093/3398/3717/8322/8325/3198/3977/81029/7476/54361/5460/659/4609/2263/5293/6774/1749/6926/8323/3399/5291/9314/5295/3716/3572/3625/7483/8324/3976/10000/7477/652/8321/3624
hsa05225	Hepatocellular carcinoma	161	-0.453501704876121	-1.43719139117289	0.00107688524328728	0.00268797340253596	0.000919346705831657	5728	tags=45%, list=28%, signal=33%	221357/5335/1499/4087/2944/5579/208/2549/51426/4088/6934/3480/2932/5594/4089/60/5578/2475/6601/3082/11211/324/2002/1647/369/2946/7046/8313/6655/2949/8322/5336/8325/653689/4780/4041/57492/5728/81029/7476/54361/4609/6464/5293/7042/1452/1021/1026/4257/8110/8323/595/5291/7043/3162/6604/2947/5925/5295/7039/7483/25759/8324/7040/4233/10000/4616/1956/7048/7477/8321/6595
hsa04024	cAMP signaling pathway	187	-0.45428300435809	-1.44588817172878	0.000244041565765559	0.00072982241837436	0.000249615504209062	5791	tags=43%, list=28%, signal=31%	64399/2771/5906/84152/154/2696/3362/490/208/778/6093/51/153/11069/5594/818/1259/5727/6548/2033/8310/493/5567/7434/476/117/9475/4790/5601/817/338442/775/2770/10846/483/27198/2737/2149/1394/5142/196883/1387/10257/5338/114/5293/112/51806/10411/9568/3725/134/7409/5291/489/113/109/5465/10451/5880/64764/5295/10398/6662/1906/7410/5350/4772/5733/2550/4881/10000/115/5021/1909/5141/478/90993/2353/5732
hsa05226	Gastric cancer	132	-0.456028120523162	-1.42972791804157	0.00310174140711779	0.00659900688628416	0.00225700717013869	4532	tags=39%, list=22%, signal=31%	2932/5594/4089/5243/2064/2475/3082/11211/324/1647/369/7046/596/8313/2247/6655/8322/8325/2254/4041/81029/7476/54361/4609/2263/999/6464/5293/7042/1452/1026/8323/6256/595/5291/7043/5925/5295/2252/7483/25759/2246/8324/1030/7040/4233/10000/4616/1956/7048/7477/8321
hsa04910	Insulin signaling pathway	126	-0.457522608078248	-1.42841960413345	0.00358105004666095	0.00741956120778771	0.00253765500382578	5521	tags=44%, list=27%, signal=33%	5255/7248/208/31/5256/23265/867/5584/5573/2932/5594/5575/868/89801/8569/2872/5834/2475/5567/2997/5170/2002/5601/1398/369/51422/5770/6655/32/5257/3098/9322/5792/3643/2889/5565/5562/6464/5293/5509/5577/10580/8660/51806/5836/6720/2308/79660/5291/5507/5295/2203/3667/9021/25759/10000
hsa04971	Gastric acid secretion	68	-0.459803608601116	-1.37205599365709	0.0306748466257669	0.0479011151742271	0.0163832470959502	4432	tags=40%, list=22%, signal=31%	818/60/5578/6548/5567/3776/476/389015/817/2770/483/3274/3708/3784/5330/196883/114/112/2776/51806/113/109/3709/3710/115/478/4638
hsa04728	Dopaminergic synapse	118	-0.459808485346244	-1.42791116243617	0.00299631361197827	0.00646143819725926	0.00220995561785723	6169	tags=46%, list=30%, signal=32%	3798/776/5527/5529/5331/2771/84152/10681/5533/5579/208/5603/1432/2790/2932/818/5578/5522/5525/5567/5530/408/5523/9575/5601/2775/817/2791/775/2770/2774/1386/3708/59345/5526/5330/2786/3800/3762/4128/2776/51806/4129/406/2788/64764/55970/5521/54331/3709/3710/10000/90993/2353
hsa04211	Longevity regulating pathway	81	-0.462437994787203	-1.4070278111586	0.0214346362399502	0.0355747627647341	0.0121673603346094	3901	tags=58%, list=19%, signal=47%	3845/79602/7157/51094/3479/9776/207/5970/79813/8503/5290/10645/2309/8408/7248/208/83667/27244/3480/2475/5567/4790/51422/26060/143686/1386/847/3643/5565/196883/5562/114/5293/112/5468/8660/6648/2308/5291/113/109/64764/5295/3667/10000/115/90993
hsa05212	Pancreatic cancer	76	-0.465066282600579	-1.40348741323337	0.0224374815967323	0.0368532728816795	0.0126046392389606	4491	tags=61%, list=22%, signal=47%	5900/207/5894/3551/5970/5595/5337/8503/1643/5290/4087/208/8517/51426/4088/5594/4089/2064/2475/4790/1647/5601/369/7046/5899/10928/5338/5293/6774/7042/1021/1026/595/5291/7043/5880/5925/5295/3716/7039/9459/7040/10000/4616/1956/7048
hsa05220	Chronic myeloid leukemia	76	-0.465921870550537	-1.40606942565526	0.0206058799537906	0.0343792839229032	0.0117584799736312	5403	tags=64%, list=26%, signal=48%	4792/3845/7157/1399/207/5894/3551/1488/1027/5970/5595/8503/1643/5290/208/613/8517/51426/4088/867/5594/4089/9846/25/4790/1647/1398/369/7046/6655/4609/6464/5293/7042/1021/6777/1026/595/5291/7043/6776/5925/5295/25759/7040/10000/4616/7048/861
hsa04066	HIF-1 signaling pathway	102	-0.465967581220363	-1.43951771649141	0.00364004306967219	0.00749281592913043	0.00256270974829963	7379	tags=56%, list=36%, signal=36%	3479/4055/207/1027/5970/3101/5595/8503/5214/3570/5290/8453/5335/5579/208/5211/7010/5160/3480/2321/7428/5594/818/5578/2064/8569/2872/2033/2475/4790/54583/817/596/3091/112399/3098/5336/3643/1387/3459/5293/405/6774/284/3569/1026/7076/5291/3162/5209/5295/1906/7099/10000/1956/1536/5054
hsa04140	Autophagy - animal	136	-0.471257371206982	-1.48085499758316	0.000647642351168593	0.00172523214554995	0.000590067776827643	7301	tags=66%, list=36%, signal=43%	5516/7249/29982/440275/6198/55578/55054/79065/3845/9776/207/5894/10325/5580/643246/6885/5289/5595/9342/8503/7879/26100/1508/3476/5290/9451/203228/81671/10533/10645/8408/64121/30849/9110/7248/208/10670/8878/29110/1613/22863/116442/55626/3480/23130/81631/5594/5588/8897/2475/5567/58528/64798/3916/5170/55014/115201/1514/5601/596/3091/8837/7189/9706/54541/3708/338382/5728/10010/55102/1509/5562/53349/2…
hsa05169	Epstein-Barr virus infection	184	-0.472115235536566	-1.50164900169076	8.86416111651989e-05	0.000288033017491778	9.85137001549168e-05	5277	tags=45%, list=26%, signal=33%	5603/8517/8737/51426/29110/3107/953/965/567/10018/1432/51135/5606/3109/3516/4939/3718/6416/6891/7187/4790/1647/5601/317/3106/596/7124/23586/3454/23118/7189/8717/79685/5336/3133/6892/916/4067/3455/4609/5293/695/9020/6773/4734/6774/1021/3569/29760/4615/9612/7431/3654/1026/3725/7188/894/595/5291/960/3683/3108/5925/7128/5295/3716/7097/3115/355/3127/3123/3117/864/3122/956/10000/3119/4616/3118/3113/311…
hsa04720	Long-term potentiation	60	-0.472155320501972	-1.39686550982581	0.0276639344262295	0.0442902384500745	0.0151482469213272	5756	tags=43%, list=28%, signal=31%	5331/5906/5533/5579/6195/5594/818/5578/2033/5567/5530/27330/369/817/775/3708/5330/6197/1387/114/2776/51806/10411/3709/3710/6196
hsa05120	Epithelial cell signaling in Helicobacter pylori infection	68	-0.472249977768432	-1.40919601408285	0.013996992399179	0.0246502588363318	0.00843093694219551	7214	tags=72%, list=35%, signal=47%	5879/51382/3577/529/5781/5600/525/4792/50617/3551/245972/9114/5970/28964/7082/6714/50848/3576/5335/5603/8517/535/1432/6416/3579/2921/537/526/4790/10312/6352/245973/5601/102/528/6868/5336/523/10392/4067/2920/1839/9020/58494/3725/83700/2919/4233/1956
hsa05206	MicroRNAs in cancer	189	-0.472588453682084	-1.50504401145435	6.605811877137e-05	0.000232671373894714	7.95787863561533e-05	4571	tags=43%, list=22%, signal=34%	472/2065/5594/27250/85414/406886/5598/5243/5578/407032/2064/25/2033/2475/5155/5292/2744/406984/1591/1942/4790/324/1398/10014/596/599/54541/6655/4851/4318/5336/1946/5728/27086/442891/1387/659/4609/6464/5293/6541/9759/6774/7042/1021/8660/7431/1026/894/4170/7148/407011/407006/407019/595/5291/1545/3162/960/407007/8434/5154/9839/5295/3667/407018/7168/6935/407040/4853/3371/407010/3678/5159/4233/23414/3…
hsa05165	Human papillomavirus infection	304	-0.474190861982687	-1.5294745436436	9.80508576844266e-08	7.40050521094363e-07	2.53113742894635e-07	4626	tags=40%, list=23%, signal=31%	3915/3516/1286/472/2932/5594/5829/5747/537/3659/5522/2033/526/23352/4799/5525/2475/5567/11211/5734/5523/7187/4790/10312/245973/1284/324/3106/9794/8313/7132/7124/528/3655/8516/3454/8717/6655/4851/8322/5526/8325/1282/3693/3133/523/5728/81029/7476/3695/3908/3672/54361/3675/1387/3914/3911/1287/8515/3455/5293/6773/26508/1452/1021/3680/3676/7450/1101/84441/1026/894/8323/3685/7148/2308/3913/595/5291/709…
hsa04727	GABAergic synapse	74	-0.47737925269161	-1.43900344468666	0.0117711477479057	0.0212014422504893	0.00725136494039647	6344	tags=54%, list=31%, signal=37%	2773/6714/776/2561/2771/10681/5579/778/10243/5334/2790/5578/5567/2744/2752/2775/4905/2791/775/2770/59345/196883/6538/2786/114/112/2564/2568/6539/9568/66008/23710/113/109/2788/55970/54331/2550/92745/115
hsa04742	Taste transduction	53	-0.477980097470875	-1.39423827253783	0.0299896587383661	0.0470629793072379	0.0160965859825519	4093	tags=32%, list=20%, signal=26%	5153/6340/5567/775/3359/5330/6338/196883/40/114/112/5028/6337/9568/5136/3710/2550
hsa04144	Endocytosis	239	-0.478072832416659	-1.53467421746415	1.70440972666331e-06	9.00496472253782e-06	3.07989827800563e-06	7897	tags=62%, list=38%, signal=38%	6455/829/55738/10097/1785/5371/116984/137492/56288/23527/382/55680/10552/3305/5590/80230/55048/10092/28964/9765/9798/84552/8218/83737/58533/5337/5867/7879/23550/116988/6714/6642/9101/3798/3134/57403/8395/64750/8723/3310/3306/23624/4087/161/11021/57132/5868/3559/274/6643/5878/22841/830/5869/3312/4088/51652/3107/1213/10015/9135/3480/867/9727/5584/64145/10096/29934/8729/377/25978/26119/3579/378/868/…
hsa04726	Serotonergic synapse	91	-0.47976004837356	-1.46913999567391	0.00439852393493289	0.00882488662894763	0.00301830756361151	6403	tags=58%, list=31%, signal=40%	774/3355/94235/5894/8605/5595/239/5742/2773/776/8681/2561/5331/2771/10681/1573/3362/5579/778/5743/2790/5594/3363/5578/5567/351/260293/369/2775/2791/775/2770/3359/3357/3708/59345/5330/2786/247/3762/4128/2776/10411/4129/2788/55970/54331/7220/3709/3710/3751/240/1843
hsa04014	Ras signaling pathway	209	-0.480454054222813	-1.53461005672191	6.19317055994504e-06	2.68936310616792e-05	9.19822015391982e-06	5541	tags=48%, list=27%, signal=35%	10681/5868/5579/5878/208/3815/9771/5869/2549/8517/283455/29110/7010/8036/3480/25780/2321/2790/5594/4254/9846/3363/5966/5578/8831/7424/25/27/5567/5155/3082/56034/1942/8844/5923/5922/4763/4790/2002/5921/5601/4303/9462/5063/2791/2247/5899/5322/6655/10928/59345/5336/2254/2324/1946/3643/4909/1969/2263/5320/64926/6464/5338/2786/5293/3791/284/2114/9610/4804/51806/10125/2113/8437/51365/5291/2788/5880/115…
hsa05210	Colorectal cancer	85	-0.481157659450345	-1.46634513847329	0.00644158358006284	0.0124511097248776	0.0042585565388092	5619	tags=46%, list=27%, signal=33%	1499/4087/208/51426/4088/6934/10018/2932/5594/4089/2475/324/1647/5601/369/7046/596/8313/5899/26060/6655/27113/4609/5293/7042/1026/3725/595/5291/7043/5880/5295/7039/7040/10000/4616/1956/7048/2353
hsa05166	Human T-cell leukemia virus 1 infection	213	-0.481390315087481	-1.54029582420868	3.63290143100145e-06	1.77173808250379e-05	6.05973841932226e-06	3641	tags=38%, list=18%, signal=32%	4776/8295/4790/6722/2005/2002/5601/4488/3106/3561/7046/7132/7124/1386/3601/3600/64784/3133/331/5728/916/4316/196883/1387/4609/114/5293/112/4215/9020/7042/2114/3569/8850/6777/1026/6688/3554/3725/894/83660/7094/2113/8829/595/5291/7043/920/113/6776/109/3683/3108/64764/5925/5295/3560/4773/3716/3115/4772/3127/3123/3117/1030/7040/3122/10000/115/3119/3118/3113/7048/3111/3689/1959/3383/90993/7538/1958/23…
hsa05235	PD-L1 expression and PD-1 checkpoint pathway in cancer	88	-0.482857401969087	-1.47846362921314	0.00515039139746104	0.0101408327515227	0.00346839041476618	5790	tags=48%, list=28%, signal=34%	919/29126/5335/5533/208/5603/8517/4775/940/1432/5606/5594/5588/114609/2475/5530/4790/238/3091/7189/3717/5728/916/3459/5293/4215/6774/4615/10125/3725/5291/920/148022/5295/4773/3716/7097/4772/7099/10000/1956/2353
hsa05223	Non-small cell lung cancer	72	-0.48512269610169	-1.45419262037344	0.00862538256436207	0.0160838016053104	0.00550101798222472	6527	tags=57%, list=32%, signal=39%	8503/6789/1643/3798/5290/5915/2309/5335/5579/208/51426/3718/5594/5578/2064/3082/5170/238/1647/369/5979/6655/5336/3800/5293/6774/1021/6777/1026/6256/595/5291/6776/5925/5295/7039/4233/10000/4616/1956/83593
hsa05231	Choline metabolism in cancer	89	-0.485170454839926	-1.48710754110027	0.00274404160441198	0.00595795334656574	0.00203775259736434	6087	tags=52%, list=30%, signal=37%	80736/5290/8681/8395/5335/7248/5579/208/10163/1606/6583/57153/5594/5130/8394/5578/6584/2475/5155/56034/6667/1609/5170/5601/3091/6655/160851/23396/5338/5293/6581/23446/7454/3725/5291/5880/5154/5295/126969/10810/5159/10000/1956/80310/5156/2353
hsa05130	Pathogenic Escherichia coli infection	184	-0.48631785463209	-1.54682303375086	1.80297814040041e-05	6.9700496403284e-05	2.38391204699925e-05	5576	tags=51%, list=27%, signal=38%	7122/137075/7430/26999/9181/5603/10006/6093/8517/8737/10163/2846/64005/8440/1432/51135/9071/10096/2017/5594/60/8795/23191/25/10802/10787/114609/837/29108/79861/147179/4690/8976/9475/9267/4790/5601/4628/9138/5063/7132/7124/9826/23118/7189/8717/4643/2149/4651/257397/2768/9871/4627/840/55930/3569/8743/4615/79784/9632/7277/3654/4542/3554/3725/23365/10095/834/84617/3059/1902/4645/114548/4644/3071/1068…
hsa05221	Acute myeloid leukemia	66	-0.48824608200225	-1.45891525476336	0.00919846893413578	0.0167581301846037	0.00573165335883839	3901	tags=41%, list=19%, signal=33%	2475/5292/4790/369/1050/11040/5467/6655/862/5914/2209/4609/5293/6774/6777/6688/595/5291/6776/5295/8864/7704/929/3684/10000/861/1436
hsa01522	Endocrine resistance	93	-0.488402744067792	-1.49493668084219	0.00212221254013453	0.00470448514141711	0.00160903858398128	4900	tags=43%, list=24%, signal=33%	2852/1432/3480/5594/5747/2064/2475/5567/6667/9611/5601/369/596/6655/4851/4318/5469/196883/6464/114/5293/112/1839/8202/1026/3725/595/5291/113/109/5925/5295/2099/25759/4853/10000/115/1956/2353/4313
hsa04650	Natural killer cell mediated cytotoxicity	101	-0.48862491464096	-1.51123671009054	0.00123276899354361	0.00302936256552964	0.00103610939481837	6012	tags=47%, list=29%, signal=33%	5290/637/919/5335/2215/5533/5579/4277/3107/5594/8795/5578/962/5530/7305/100507436/2207/3106/369/80328/7124/3454/6655/5336/3133/6452/3459/3455/6464/5293/8743/2185/7409/5291/3937/3683/10451/5880/5295/4773/7410/25759/4772/355/2214/3689/3383
hsa04012	ErbB signaling pathway	82	-0.488963918804943	-1.48868315401878	0.00425244617460653	0.0085861492824858	0.00293665407968134	5457	tags=49%, list=27%, signal=36%	5579/208/2549/8440/867/2932/2065/5594/6416/818/5747/868/5578/2064/25/27/2475/4690/2002/5601/1398/369/817/5063/6655/5336/4609/6464/5293/1839/6777/1026/3725/5291/6776/5295/7039/25759/10000/1956
hsa05100	Bacterial invasion of epithelial cells	67	-0.489614590572739	-1.46099117621643	0.00801475255732429	0.0151230747659036	0.00517242802884964	7970	tags=72%, list=39%, signal=44%	1495/391/10097/1785/26084/79767/1399/10552/10092/8218/8503/63916/6714/5290/9844/1499/23607/2549/10163/1213/867/10096/2017/5829/60/5747/8976/9564/1398/3611/1759/999/26052/6464/5293/1793/10095/7414/5291/3059/5295/3688/25759/857/3678/4233/858/2335
hsa05202	Transcriptional misregulation in cancer	156	-0.489976697644227	-1.54839019833505	3.50789265272251e-05	0.000127816318495751	4.37160245892823e-05	5827	tags=53%, list=28%, signal=38%	597/3576/55589/2119/3205/4066/3207/5327/51426/7850/905/3480/2321/4005/472/7113/85414/5747/4300/5966/4149/7185/4086/1051/6667/4790/2005/9611/1647/51274/2120/4297/1050/4318/3398/330/7403/3206/3695/862/5914/2209/4609/5090/26471/3569/4286/5468/4804/2078/7030/2313/1026/6688/894/2308/6256/3486/942/604/64332/4208/5154/3560/4299/8864/8013/7704/6935/5218/860/8842/929/3684/4233/4094/4616/2115/7048/861/1436…
hsa04010	MAPK signaling pathway	275	-0.490384630405038	-1.57803145275669	3.10449144666439e-08	2.73367719053503e-07	9.34978418147462e-08	5750	tags=53%, list=28%, signal=39%	80824/5906/781/3310/3306/5533/5579/208/3815/778/5801/5603/3312/8517/4775/7010/782/1326/4214/4137/9693/8986/6195/1432/3480/25780/51135/5606/4216/2321/6788/2065/5594/4254/6416/5598/5578/4149/57551/3556/2064/8569/2872/7424/9261/8913/9448/5567/5155/3082/1849/5530/56034/27330/408/1942/5923/23542/5922/4763/4790/6722/2005/1844/2002/5921/1647/5601/1398/369/7046/2247/7132/7124/775/23118/7189/8717/10746/66…
hsa05214	Glioma	73	-0.490412286256299	-1.47504021809297	0.0057229458805113	0.0111299008841846	0.00380667372097297	4491	tags=62%, list=22%, signal=48%	3845/7157/3479/207/5894/8536/5595/91860/8503/1643/5290/5335/5579/208/51426/3480/5594/818/5578/2475/5155/1647/369/817/6655/5336/5728/6464/5293/1021/51806/1026/595/5291/57118/5925/5154/5295/7039/25759/5159/10000/4616/1956/5156
hsa05217	Basal cell carcinoma	59	-0.491611925787912	-1.45287238193906	0.0125313488139138	0.0224362058742525	0.00767368157080528	5791	tags=47%, list=28%, signal=34%	64399/374654/1499/51426/6934/2932/51684/5727/11211/324/1647/8313/2737/8322/8325/81029/7476/2736/54361/1026/650/8323/7483/8324/4616/7477/652/8321
hsa05213	Endometrial cancer	57	-0.491676393944499	-1.44437673213311	0.0163083552243426	0.0280964598158512	0.00960961434843988	6738	tags=61%, list=33%, signal=41%	3845/7157/207/5894/5595/8503/1643/5290/2309/1499/208/51426/6934/2932/5594/2064/5170/324/2002/1647/369/8313/3611/6655/5728/4609/999/5293/1026/595/5291/5295/10000/4616/1956
hsa04922	Glucagon signaling pathway	88	-0.49446477091779	-1.51400429349939	0.0025625415062277	0.00560224591361505	0.00191609274149876	5944	tags=43%, list=29%, signal=31%	200186/5331/5255/5533/150094/208/5211/31/5256/5160/818/5834/2033/5567/2997/5530/817/51422/32/1386/3708/5257/23235/5330/5565/5562/1387/2776/51806/5836/2308/5465/64764/2203/3709/3710/10000/90993
hsa04917	Prolactin signaling pathway	63	-0.495392294696913	-1.47340995152118	0.00846408812211057	0.015876425649166	0.00543009079151286	7267	tags=59%, list=35%, signal=38%	207/5894/5970/5595/8503/6714/5290/2309/8835/208/5603/9655/1432/2932/5594/3659/4790/5601/6655/8792/3717/9306/6464/5293/6774/1154/6777/894/595/5291/6776/5295/2099/9021/25759/10000/2353
hsa04142	Lysosome	129	-0.496392509091374	-1.55338671229979	0.00011484241205527	0.00035004850597616	0.000119724376940211	6695	tags=60%, list=33%, signal=40%	245972/9114/1657/23163/22901/8218/10717/8906/1508/285362/26985/967/4668/4669/2629/4125/6556/2517/1497/2720/535/1213/8943/10577/2760/1203/23431/3425/8722/6272/537/164/162/23062/427/2581/411/3916/5538/4126/10312/23659/79158/1514/2588/26503/4891/9583/5660/4074/5476/3074/1510/4864/23335/9516/1521/410/950/2548/1512/1509/3920/135112/1200/138050/2799/3988/6609/1519/20/1522/3482/1520/3423/7805/1513
hsa05131	Shigellosis	215	-0.497448109588148	-1.59208959783613	7.03131212750696e-07	4.37044302827393e-06	1.49478874950096e-06	5846	tags=50%, list=28%, signal=36%	2309/64121/5331/3576/9844/5335/30849/208/9181/10670/25851/8945/5603/6093/8517/8737/8878/8915/29110/10163/5333/22863/7316/1432/10096/472/2017/2932/81631/5594/5829/60/5588/5747/55072/1729/837/29108/2475/58528/8976/9475/9267/4790/6352/54874/9564/5601/4303/23291/1398/823/10241/596/81/7132/7124/3611/23118/7189/8717/3708/3098/5336/10892/257397/5330/10392/5293/4615/8678/23048/1793/3554/3725/7188/10095/8…
hsa04660	T cell receptor signaling pathway	97	-0.498385790867795	-1.53595346303352	0.000838086062566391	0.00219564695730203	0.000750960108258706	7719	tags=62%, list=38%, signal=39%	4792/3845/915/7535/207/5894/3551/5970/6885/5595/917/8503/959/3702/5290/919/5335/5533/208/5603/8517/8915/4775/1326/940/8440/1432/2932/5594/5588/868/5530/4690/925/4790/5170/5601/5063/7124/6655/10892/916/3586/5293/9020/10125/3725/7409/5291/3937/920/10451/5295/4773/5788/7410/4772/10000/84433/2353
hsa04722	Neurotrophin signaling pathway	115	-0.499879834406038	-1.54873030331539	0.000388162604882061	0.00110308223428589	0.000377278665553535	7746	tags=63%, list=38%, signal=39%	5908/4792/3845/7157/25970/1399/207/5894/3551/356/5580/5970/10782/5595/91860/8503/4803/10818/5290/4915/2309/5906/5335/208/57498/5603/2549/5663/4214/6195/1432/51135/2932/5594/818/6272/5598/25/9261/27330/11213/4790/5170/5601/1398/817/596/7189/6655/5336/4909/2889/3656/6197/6464/9500/5293/4215/4804/3654/51806/397/4145/3725/4217/5291/10019/5295/3667/25759/6196/10000
hsa04062	Chemokine signaling pathway	179	-0.500364417111155	-1.59037571611129	2.56494439086422e-06	1.33293011787534e-05	4.55891755408135e-06	6022	tags=54%, list=29%, signal=39%	3702/5290/653361/2309/5331/3576/2771/5906/9844/5335/146850/10681/5579/208/6093/8517/2790/1236/2932/3718/5594/5829/729230/3579/5747/2921/57580/1233/6846/5567/10344/2833/408/9475/4790/6352/9564/1398/4283/2791/6367/2770/2268/6655/2869/3717/59345/5336/6347/5330/6356/196883/4067/2920/6464/2786/114/5293/112/23533/6773/6774/388372/2776/5294/6777/58191/1234/7454/2185/7409/6372/6351/6348/5291/1794/113/414…
hsa05218	Melanoma	65	-0.500613300577927	-1.49283028352564	0.00701153910471821	0.0133895053987691	0.00457950873675317	3871	tags=42%, list=19%, signal=34%	5155/3082/56034/1647/369/2247/2254/5728/999/5293/1021/4286/1026/595/5291/5925/5154/5295/2252/2246/5159/4233/10000/4616/1956/80310/5156
hsa04210	Apoptosis	132	-0.500632945422762	-1.56957184557208	8.43780380007303e-05	0.000280877091044119	9.60662141044138e-05	4828	tags=45%, list=24%, signal=34%	10018/8739/472/5594/60/8795/8722/6709/10039/7185/3563/79861/4790/5170/1514/1647/5601/317/823/5783/596/7132/7124/8837/8717/3708/330/27113/331/153090/1521/1512/1509/2081/843/5293/840/9020/8743/7277/1519/3725/4217/4170/4000/1522/5291/1439/1520/5295/3709/824/3710/143/355/10000/4616/1513/2353
hsa04261	Adrenergic signaling in cardiomyocytes	131	-0.500847362914115	-1.56882259460118	5.32518131060325e-05	0.000189672188254071	6.4872108219058e-05	6738	tags=55%, list=33%, signal=37%	5595/91860/147/786/784/2773/491/776/5527/93589/5529/5331/2771/781/154/146850/490/208/778/5603/782/153/1432/11069/5594/185/818/5578/6548/5522/6330/493/6331/5525/5567/476/5523/7169/7171/817/596/6332/775/2770/483/6324/1386/5526/3784/5330/196883/114/112/23533/2776/5294/51806/10411/489/113/183/109/7139/64764/5521/7168/5350/10000/115/27092/478/90993
hsa04916	Melanogenesis	91	-0.501701969676359	-1.53633140579061	0.00103301353707422	0.00259893088295656	0.000888892183113152	5756	tags=46%, list=28%, signal=33%	5331/2771/1499/4157/5579/3815/6934/2932/5594/4254/818/5578/2033/5567/11211/2775/817/2770/8322/8325/81029/7476/5330/54361/196883/1387/114/112/2776/4286/51806/8323/113/109/64764/1906/7483/8324/115/7477/90993/8321
hsa04934	Cushing syndrome	141	-0.504146831282773	-1.58697974526899	1.99664980950932e-05	7.62575891101752e-05	2.60817920582701e-05	4532	tags=41%, list=22%, signal=32%	2932/5594/185/818/5151/8913/5567/11211/3776/6667/324/949/4297/817/2767/8313/775/2770/1386/3708/8322/8085/8325/81029/7476/5330/1394/54361/196883/114/112/405/1021/2776/196/1026/8323/57552/595/113/183/109/8912/64764/5925/3709/3949/7483/3710/8324/1030/51655/115/1956/7477/3164/90993/8321
hsa05200	Pathways in cancer	485	-0.504968867445949	-1.64503213942136	1e-10	2.43846153846154e-09	8.34008097165992e-10	4839	tags=47%, list=24%, signal=37%	6934/10018/5743/3480/867/25780/2790/7428/3915/1286/2932/3718/5594/51684/4254/185/818/4089/5747/5578/4149/2064/5727/7424/25/7185/3594/2033/3563/2475/3592/5567/5155/3082/5292/11211/5734/9475/6667/7187/4790/1284/238/54583/324/2002/1647/5601/317/1398/3561/369/6778/2946/7046/9138/817/1050/2767/2791/596/11040/8313/2247/2770/5467/3091/3655/5899/5979/3454/9826/112399/7189/26060/6655/2949/4851/4318/10928/…
hsa04360	Axon guidance	172	-0.506288236608537	-1.60594009486184	1.60323537890371e-06	8.61399347648265e-06	2.94617741350727e-06	6536	tags=59%, list=32%, signal=40%	151449/8503/56920/2047/2773/6714/56963/9901/6092/5290/10507/57689/5998/2771/5335/3984/5533/55740/22854/6093/64218/4775/25791/8440/85464/10501/2932/5594/6091/818/5747/2042/5578/5727/25/84628/2050/5530/4690/1942/9475/4776/57522/5170/8633/5921/7869/6259/817/5063/2770/3611/90249/5336/84448/1946/54434/5364/5362/223117/81029/54437/22885/3983/54361/54961/8482/1969/659/5293/9353/10154/2043/55558/3985/236…
hsa04213	Longevity regulating pathway - multiple species	57	-0.506449493510484	-1.48777503544275	0.00919595941088647	0.0167581301846037	0.00573165335883839	6012	tags=54%, list=29%, signal=39%	5290/2309/3310/3306/208/3312/3480/1979/2475/5567/51422/847/3303/3643/5565/196883/5562/114/5293/112/8660/6648/2308/5291/113/109/5295/3667/10000/115/1410
hsa05161	Hepatitis B	148	-0.506543342812222	-1.59769766650062	7.01651515424421e-06	2.92662539986239e-05	1.00097099845866e-05	5457	tags=52%, list=27%, signal=38%	5579/208/5603/8517/4088/29110/4775/1654/4214/1432/1642/51135/5606/3718/5594/6416/4089/537/5578/2033/114609/4776/7187/4790/2002/5601/317/369/6778/7046/596/7124/23586/64135/3454/23118/7189/6655/1386/4318/3717/1387/843/4609/5293/6773/6774/7042/3569/4615/3654/6777/1026/3725/2185/5291/7043/6776/7098/64764/5925/148022/5295/4773/3716/7097/3339/4772/355/7099/7040/10000/7048/1959/90993/1960/2353
hsa04657	IL-17 signaling pathway	83	-0.506924239912702	-1.54434539942722	0.00148120800315462	0.00347809582962973	0.00118958615458032	5751	tags=52%, list=28%, signal=37%	3576/8061/10758/29761/5603/8517/29110/5743/1432/2932/5594/2921/5598/4322/6279/1051/7187/4790/84818/5601/132014/7124/23118/7189/8717/4318/6347/257397/6356/6280/2920/3569/3934/3725/7188/6372/7128/2919/3553/23765/727897/2353/2354
hsa04962	Vasopressin-regulated water reabsorption	41	-0.508244043167418	-1.44016260988902	0.0294016946404689	0.0463698368210381	0.0158595158312035	6306	tags=46%, list=31%, signal=32%	360/51164/5868/6810/5878/5869/1781/1778/554/6844/5567/4905/112/1783/397/109/64764/115/90993
hsa04662	B cell receptor signaling pathway	78	-0.508251763609558	-1.54140836729808	0.00178111007758883	0.00401119657963874	0.00137191847153508	7267	tags=65%, list=35%, signal=42%	207/5894/3551/3636/10990/5970/975/5595/8519/8503/5290/5533/5579/208/27071/8517/8915/4775/25780/11025/2932/5594/5530/11024/4790/10288/11027/6655/5336/10892/11006/2213/4067/5293/695/29760/10859/3725/7409/118788/5291/10451/5880/5295/4773/3635/7410/4772/10000/84433/2353
hsa04310	Wnt signaling pathway	153	-0.508532278946117	-1.60561979827696	5.28832571386585e-06	2.391989657731e-05	8.18113680047461e-06	3882	tags=40%, list=19%, signal=33%	5567/5530/11211/57216/9475/7090/4776/7091/324/27130/5601/6259/23291/81839/817/8313/5467/4007/8322/8325/2239/4041/81029/7476/5330/54361/4316/25805/1387/4609/1501/22943/27123/1452/144165/3725/894/8323/6907/4920/166336/595/64840/23500/5880/4773/4919/7483/85407/4772/85409/8324/7089/7477/5176/8321/59352/6422/6423/6424/284654
hsa04020	Calcium signaling pathway	206	-0.508546501257229	-1.62352309469563	1.14985668203848e-07	8.47685042339994e-07	2.89927143818759e-07	5756	tags=47%, list=28%, signal=34%	5331/5335/154/3362/5255/5533/5579/490/219931/778/553/5256/5333/153/57620/2321/80228/2065/185/552/818/3363/5578/2064/6915/7424/8913/5153/5737/493/5567/5155/3082/5530/56034/80271/55283/2668/817/2767/2247/775/5979/3357/2774/8877/3274/3708/5257/2149/5336/136/2254/2324/5330/196883/9630/624/3707/2263/114/3791/53373/2776/4842/51806/444/2185/489/5027/57118/113/109/5724/8912/6786/2769/5154/6869/3709/2252/…
hsa05222	Small cell lung cancer	91	-0.508651873316921	-1.55761367270517	0.000504708273472705	0.0013912393277465	0.000475834802450239	3521	tags=43%, list=17%, signal=36%	7187/4790/1284/1647/317/596/3655/7189/330/1282/331/5728/3908/3675/3914/3911/1287/4609/5293/1021/1026/7188/3685/6256/3913/595/5291/5925/5295/3910/3909/3688/3918/3673/1030/10000/3912/4616/2335
hsa05215	Prostate cancer	93	-0.508730174465869	-1.55715627665415	0.00051605378408484	0.00141025042719737	0.00048233702142231	5721	tags=49%, list=28%, signal=36%	2119/1499/208/8517/5327/7850/6934/3480/2932/7113/5594/2064/2033/2475/5155/56034/4790/5170/369/596/6655/4318/5728/1387/2263/4824/5293/2078/1026/2308/595/5291/64764/5925/5154/5295/7039/6935/5159/10000/367/1956/80310/90993/5156/5328
hsa04540	Gap junction	77	-0.508940760495086	-1.54028129091272	0.00128014705877786	0.00309776043994338	0.00105950298958714	4491	tags=44%, list=22%, signal=35%	5594/5598/5578/5567/5155/79861/56034/2767/2697/2770/3357/10746/6655/3708/2977/5330/196883/114/112/2776/7277/84617/5592/113/109/1902/5154/3709/3710/5159/115/1956/80310/5156
hsa04725	Cholinergic synapse	98	-0.509654674386942	-1.57062129696739	0.000389732524416468	0.00110308223428589	0.000377278665553535	7680	tags=66%, list=37%, signal=42%	3845/3770/1143/43/774/207/94235/3759/3761/5595/8503/2773/776/9132/5290/56479/5331/2771/146850/10681/5579/208/778/2790/5594/818/5578/5567/3786/8973/3768/2775/817/2767/2791/596/775/2770/3708/3717/59345/3784/5330/196883/2786/114/5293/112/23533/2776/5294/5291/113/109/2788/64764/55970/5295/54331/3709/3710/10000/115/90993/2353
hsa05164	Influenza A	148	-0.50969301952167	-1.60763211969268	5.35745317662148e-06	2.391989657731e-05	8.18113680047461e-06	4755	tags=45%, list=23%, signal=35%	51135/3109/4939/7113/5594/60/8795/5578/2033/29108/3592/103/79671/7187/4790/6352/7177/317/10241/7132/7124/23586/64135/3454/64499/8717/3717/6347/1387/3459/3455/90865/5293/5611/6773/1021/3569/8743/4615/834/5291/7098/114548/3108/148022/5295/3716/3553/9021/3606/6041/3115/355/51284/3127/7099/3123/3117/3122/4261/10000/3119/3118/3113/3111/3383
hsa04666	Fc gamma R-mediated phagocytosis	91	-0.510117151873091	-1.56210070604396	0.000458451515663276	0.00127481693390578	0.000436015753585572	7487	tags=69%, list=36%, signal=44%	382/1399/85477/10552/207/5894/3636/10092/5580/8605/5595/5337/8503/4082/5290/653361/8681/8395/5335/2215/3984/274/5579/208/10163/10096/5594/9846/8394/5578/273/7408/1398/8877/5336/4651/8853/50807/2213/2209/23396/2934/4067/5338/5293/3985/1793/7454/10095/7409/55616/5291/10451/5880/5295/5788/3055/3635/7410/10810/2212/10000/2214
hsa02010	ABC transporters	41	-0.511001138813114	-1.44797512852883	0.0268588713114698	0.0432196051052586	0.0147820664978968	7858	tags=68%, list=38%, signal=42%	5244/154664/21/6890/10349/5825/9429/215/23461/10057/4363/22/23456/6891/5243/23460/64137/10350/10347/9619/10257/10060/10351/24/20/19/1672/8714
hsa04740	Olfactory transduction	46	-0.511984271356965	-1.47043523749234	0.0169695926780054	0.0289258419051839	0.00989328147512515	5013	tags=35%, list=24%, signal=26%	343171/818/5153/5567/408/817/5138/2774/57101/83988/51806/5592/109/2788/5997/5136
hsa04390	Hippo signaling pathway	146	-0.512767942387482	-1.61646888518833	7.15545155296578e-06	2.94581576920799e-05	1.00753453172314e-05	5145	tags=49%, list=25%, signal=37%	84962/4088/1742/6934/5584/4092/6788/92597/2932/3397/7159/4089/60/7533/9113/5522/4086/353500/6657/55233/11211/4771/324/60485/23291/7046/8313/656/392255/3398/330/27113/8322/8325/654/81029/7476/2736/54361/126374/659/4609/999/7003/7042/25937/894/650/8323/23286/595/7043/5521/154796/286204/26524/7483/85407/122786/2246/85409/9231/8324/7040/6591/7048/7477/3689/652/8321/5054
hsa05162	Measles	122	-0.513545386079256	-1.59809942279294	2.20091784700723e-05	8.30584473215823e-05	2.84078368723991e-05	7719	tags=69%, list=38%, signal=43%	4792/4599/7157/915/27102/4940/207/3551/3305/4938/356/57506/1027/5970/6885/4600/917/896/8503/9367/841/5290/9451/637/3310/3306/3559/208/3312/8517/29110/940/51135/4939/2932/3718/868/51209/3592/103/4179/7187/4790/5601/317/3561/596/23586/64135/3454/23118/7189/8717/27113/3303/916/30835/2213/3455/5293/6773/6774/1021/3569/4615/3654/6777/3725/894/595/5291/6776/4478/7128/5295/3560/3716/3553/7097/355/51284/…
hsa04920	Adipocytokine signaling pathway	63	-0.517004959970307	-1.53769095959015	0.0030390744586324	0.00650936894180047	0.00222634899885588	3518	tags=38%, list=17%, signal=32%	2475/4790/5601/3953/7132/7124/51422/8717/32/3717/5565/5562/948/6774/8660/6256/7133/5465/2182/3667/9021/2180/10000/51703
hsa05032	Morphine addiction	73	-0.517893891416547	-1.55769816530421	0.00132288965320736	0.0031769395459601	0.0010865840054255	4340	tags=45%, list=21%, signal=36%	5151/5578/5153/5567/27115/408/2775/2791/2770/10846/5138/5150/2869/59345/5142/196883/2786/114/112/2564/3762/2568/9568/134/113/109/2788/55970/54331/5136/2550/115/5141
hsa04015	Rap1 signaling pathway	196	-0.519233059065575	-1.65650730810184	4.67442033464351e-08	3.89945064758419e-07	1.33369887664344e-07	5802	tags=54%, list=28%, signal=39%	9863/5331/2771/5906/5335/1499/5579/208/6494/3815/9771/55740/5603/7010/2846/9693/26037/1432/3480/25780/5606/2321/5584/11069/889/5594/3397/4254/60/25865/5578/7424/5155/3082/56034/9855/1942/7408/9564/1398/23094/2775/2247/2770/5899/2149/136/2254/2324/1946/3643/5330/1500/2889/196883/1969/2263/999/114/5293/112/3791/284/5028/2776/4804/51806/10411/83660/7094/7409/5587/5291/3937/113/109/3683/1902/9732/235…
hsa05167	Kaposi sarcoma-associated herpesvirus infection	177	-0.519840060211342	-1.6514195254574	1.52961653017745e-07	1.0775298668139e-06	3.68539187387784e-07	5751	tags=53%, list=28%, signal=39%	3576/5335/146850/1499/10681/5533/208/5603/8517/29110/4775/4277/22863/3107/7316/6934/5743/1432/2790/2932/81631/5594/6416/2921/57580/9261/1233/2033/2475/5155/5530/4776/7187/4790/100507436/5601/3106/2791/2247/7132/3091/3454/8717/3708/3717/59345/5336/3133/1387/3459/4067/3455/4609/2920/2786/5293/23533/6773/6774/1021/3569/5294/8678/1234/51806/1026/3725/942/595/5291/7098/2788/5925/148022/55970/5295/5433…
hsa04919	Thyroid hormone signaling pathway	115	-0.520079771660325	-1.61131385399604	7.33465792039471e-05	0.000250009307609153	8.55087454216927e-05	5756	tags=51%, list=28%, signal=37%	5331/5335/1499/2626/5579/208/5211/5333/9969/2932/5594/60/5578/6548/2033/5208/1734/2475/5567/476/9282/5170/9611/3091/483/4851/5336/10499/5469/5330/7067/8648/1735/54361/1387/10231/4609/5293/9882/23389/8850/8202/3685/2308/6256/595/5291/489/5295/2099/5350/4853/1827/6567/10000/3690/478/652/113026
hsa04068	FoxO signaling pathway	123	-0.520938820380216	-1.62285232110349	1.41589064442571e-05	5.54120165781418e-05	1.89521424789926e-05	4828	tags=46%, list=24%, signal=36%	10018/1432/3480/9454/472/5594/4089/2033/116986/26260/5170/1647/5601/4303/369/7046/51422/6655/847/3643/5728/5565/3586/5562/1387/5293/3575/6774/7042/3569/8743/1263/8660/1026/6648/894/1901/2308/23710/604/595/5291/7043/5934/6446/5295/3667/1030/7040/80854/10769/10000/4616/1956/7048/10365/114907
hsa04921	Oxytocin signaling pathway	136	-0.522153195936921	-1.64078742731771	3.57084711493336e-06	1.76868521161543e-05	6.04929692167987e-06	7225	tags=61%, list=35%, signal=40%	5894/5020/4659/3759/8605/8536/3761/5595/91860/786/784/2773/6714/776/1938/93589/8681/10645/5331/2771/781/146850/54776/5533/5579/778/6093/4775/782/5743/5594/818/60/5598/5578/5567/5530/7226/9475/4776/2002/3768/2775/817/775/2770/51422/3708/2977/5330/29904/5565/196883/5562/114/112/23533/3762/2776/5294/51806/1026/3725/595/57118/4660/113/109/4208/10398/4773/3709/5997/3710/4772/1827/4881/115/5021/1956/27…
hsa04970	Salivary secretion	74	-0.522353956451972	-1.57457438387184	0.00133756747803688	0.00318803677096009	0.00109037950326711	5941	tags=49%, list=29%, signal=35%	6558/280/5331/154/5579/490/153/5578/6548/493/6844/5567/476/483/3708/2977/5330/196883/683/114/112/2776/4842/51806/5592/4069/113/109/1470/3783/3709/3778/3710/115/478/727897
hsa04664	Fc epsilon RI signaling pathway	60	-0.523609695697974	-1.5490926243366	0.00408029240404826	0.00829136341079037	0.00283583075315095	6012	tags=53%, list=29%, signal=38%	5290/8681/5335/208/5603/1432/5606/5594/6416/9846/5578/2207/5170/5601/7124/6655/5336/4067/5293/695/7409/5291/3937/10451/5880/5295/3635/7410/2205/10000/240/241
hsa04918	Thyroid hormone synthesis	62	-0.525449749034908	-1.56232156346977	0.00168283512581186	0.00389385937870335	0.00133178653829137	5457	tags=42%, list=27%, signal=31%	5579/821/3309/53905/6528/5578/5567/476/483/1386/3708/5330/493869/196883/114/112/2776/113/109/64764/3709/3710/115/478/90993/2878
hsa05163	Human cytomegalovirus infection	203	-0.525835764099307	-1.67827980822354	5.62865860772044e-09	6.86263376402838e-08	2.34717342751095e-08	5756	tags=55%, list=28%, signal=40%	5331/3576/2771/1499/10681/7248/5533/5579/208/5603/6093/8517/8737/29110/4775/3107/567/5743/1432/3588/2790/2932/5594/5829/6891/3579/5747/5578/2475/5567/5530/5734/9475/4776/6667/4790/6352/2002/9564/3106/1398/2775/9138/2767/2791/7132/7124/2770/9826/8717/6655/1386/3708/59345/6347/3133/6892/2768/5330/196883/4609/2786/114/5293/112/11214/6774/388372/1021/2776/3569/1234/51806/1026/3554/23365/7188/2185/368…
hsa04961	Endocrine and other factor-regulated calcium reabsorption	46	-0.529504304488819	-1.52075333420033	0.00891653471843336	0.0164333808473452	0.00562058186045677	5756	tags=52%, list=28%, signal=38%	5331/161/5579/490/1213/5745/5578/160/493/5567/476/3816/483/163/1759/5330/624/26052/112/2776/7421/2099/115/478
hsa00380	Tryptophan metabolism	37	-0.531792407316847	-1.47707352458868	0.0126690247681111	0.0224362058742525	0.00767368157080528	3325	tags=30%, list=16%, signal=25%	26/847/1544/4128/224/4129/11185/219/1545/217/316
hsa05418	Fluid shear stress and atherosclerosis	134	-0.533875282749168	-1.67530579231528	1.53772696995993e-06	8.49837702460535e-06	2.90663401472472e-06	3339	tags=54%, list=16%, signal=46%	6385/5290/653361/221357/1499/2944/208/9181/5603/8517/8878/5327/6401/92/7850/1432/6416/60/5747/5598/5155/4790/1514/5601/2946/596/7132/7124/90/2949/4318/653689/6347/4780/1003/5562/659/5293/3791/4688/51806/4257/3554/3725/6382/4205/3685/4217/59341/5291/3162/2947/2817/5880/5175/4208/5154/5295/3553/1906/857/7056/6383/858/10000/3690/7412/3383/10365/652/1843/2353/4313
hsa04520	Adherens junction	65	-0.534216804825658	-1.59303602859011	0.00100390118262685	0.00254589339914168	0.000870752183667917	5119	tags=55%, list=25%, signal=42%	4088/10163/6934/3480/5594/4089/60/2064/2033/5787/8976/9855/2241/7046/81/5770/5792/4008/3643/8826/1500/6615/5795/1387/999/10580/7454/7414/5797/87/5880/10810/4233/6591/1956/7048
hsa00590	Arachidonic acid metabolism	46	-0.534711479385235	-1.53570850740357	0.00694893492144868	0.0133503780006014	0.00456612629607154	3658	tags=35%, list=18%, signal=29%	151056/4051/5322/5730/493869/5320/6916/247/874/2687/113612/9536/27306/240/2878/5740
hsa05211	Renal cell carcinoma	65	-0.534909186852049	-1.59510071375842	0.000985137225996465	0.00251845565032967	0.000861367863137826	4665	tags=46%, list=23%, signal=36%	7428/5594/2033/5155/3082/54583/1398/369/5063/3091/112399/6655/201163/2889/1387/5293/405/7042/7030/1026/3725/2113/5291/7043/5295/7039/2034/7040/4233/10000
hsa04072	Phospholipase D signaling pathway	133	-0.535630785944946	-1.67971007403579	1.55490809913915e-06	8.49837702460535e-06	2.90663401472472e-06	5872	tags=55%, list=29%, signal=39%	8681/8395/5331/3576/5335/146850/7248/208/3815/553/2549/2846/1606/11069/5594/4254/185/552/9846/3579/8394/5578/5737/554/2475/5155/56034/9267/1609/2207/5899/8877/6655/160851/2149/5336/3643/1759/2768/5330/196883/23396/56894/26052/6464/5338/114/5293/112/23533/5294/10411/2185/5291/113/183/109/1902/9265/5154/5295/22808/27128/57121/25759/10161/2205/5159/10000/115/1956/80310/5156
hsa04929	GnRH secretion	58	-0.536747512613813	-1.58265800722609	0.0019622731512851	0.00438056752786884	0.00149825155361279	6738	tags=57%, list=33%, signal=38%	5595/8503/57657/776/5290/3782/5331/5579/208/778/2852/5594/5578/8913/408/2767/775/3708/5330/5293/3762/2776/9568/5291/8912/5295/3783/7220/3709/3710/6696/2550/10000
hsa01521	EGFR tyrosine kinase inhibitor resistance	78	-0.537001340313561	-1.62859908902447	0.000279323241042964	0.000819865438987218	0.000280412220540207	6282	tags=60%, list=31%, signal=42%	6714/3570/5290/2309/5335/5579/208/2549/10018/3480/2932/2065/5594/5578/2064/2475/5155/3082/56034/4763/369/596/2247/6655/3717/5336/5728/2263/6464/5293/3791/6774/3569/5291/558/5154/5295/3716/7039/25759/5159/4233/10000/1956/2621/80310/5156
hsa00982	Drug metabolism - cytochrome P450	43	-0.537443922261124	-1.52811145115641	0.00780440317257025	0.0148143461419447	0.00506683597084611	3209	tags=40%, list=16%, signal=33%	2946/2949/653689/218/1544/2329/4128/2326/4257/4129/222/2947/221/27306/125/316/2327
hsa04151	PI3K-Akt signaling pathway	311	-0.538729337121763	-1.73816733519057	1e-10	2.43846153846154e-09	8.34008097165992e-10	4828	tags=48%, list=24%, signal=37%	10018/3480/2321/2790/3915/1286/2932/3718/2065/5594/4254/5747/7533/5586/5578/2064/5522/7424/3563/5525/2475/5155/3082/2997/56034/1942/5523/4790/1284/5170/3561/2791/23035/596/2247/3655/8516/3454/54541/6655/1386/3717/2149/59345/5526/1282/3693/2254/2324/1946/3643/5728/3695/4909/3908/3672/3675/5562/1441/1969/3914/3911/1287/8515/3455/4609/2263/2786/5293/23533/3575/3791/284/1021/3680/3569/5294/4804/3676/…
hsa04071	Sphingolipid signaling pathway	115	-0.539891195298902	-1.67269370977145	9.03382945253414e-06	3.62496700816876e-05	1.23981936523786e-05	7267	tags=66%, list=35%, signal=43%	207/5894/5590/5519/5970/5595/5337/8503/29956/2773/8879/10672/5290/5527/53637/637/4363/5529/5331/2771/5579/208/1903/5603/6093/130367/253782/1432/9517/5594/9846/5578/5522/427/5525/55304/9475/5523/4790/2207/5170/5601/596/7132/7124/2770/8717/8877/8439/5526/5728/2768/5330/1509/624/340485/5338/5293/10558/2776/259230/6609/123099/8560/134/1901/4217/5291/5880/5521/5295/81537/166929/140/2205/10000
hsa04911	Insulin secretion	70	-0.539989261445658	-1.6125393716296	0.000584101964138816	0.00156915527654241	0.000536686015221214	4622	tags=40%, list=23%, signal=31%	11069/818/5578/6844/5567/476/117/3779/817/2767/775/483/1386/5330/196883/114/112/2776/113/109/64764/3783/54795/3778/3710/115/478/90993
hsa04750	Inflammatory mediator regulation of TRP channels	87	-0.540977071809448	-1.65311792686618	9.30527236569172e-05	0.000294977133992427	0.000100888742491184	6527	tags=56%, list=32%, signal=39%	8503/239/6714/4803/5290/8681/5331/5335/1573/5029/5579/5603/1432/5606/818/5588/5578/3556/5567/41/5734/5601/817/3357/3708/5336/51393/5330/196883/624/40/114/5293/112/2776/51806/3554/59341/5291/113/109/5583/5295/3553/3709/3710/115/3269/5732
hsa04371	Apelin signaling pathway	129	-0.541424704456435	-1.69430828670836	9.18287469003113e-07	5.40151222331249e-06	1.84743735348227e-06	3191	tags=35%, list=16%, signal=30%	7046/10014/2791/2770/51422/8877/3708/59345/5346/5330/5565/196883/5562/999/2786/114/112/23533/9759/2776/4842/5294/8678/51806/4205/595/113/109/2788/55970/4208/22808/54331/187/4209/3709/3710/6696/10000/115/4638/10365/1958/5054/59
hsa05417	Lipid and atherosclerosis	189	-0.541442219315134	-1.72432136963927	2.48044659938127e-09	3.27625655001609e-08	1.12055263042224e-08	6036	tags=59%, list=29%, signal=42%	841/5290/9451/653361/637/57534/5331/3576/5906/5335/3310/3306/1573/5533/208/5603/3309/3312/8517/29110/4775/6401/1432/51135/5606/2932/5594/6416/818/8795/5747/2921/5578/114609/29108/22926/3592/5530/7436/9475/7187/4790/6352/5170/5601/317/9138/817/596/7132/7124/23118/7189/4318/3708/3717/3303/6347/4780/23643/5330/10010/9619/4689/2081/4067/2920/948/5293/840/6774/4688/3569/5468/8743/4615/10333/25833/3654…
hsa04912	GnRH signaling pathway	84	-0.542404127779817	-1.65374552108213	8.50605701584713e-05	0.000280877091044119	9.60662141044138e-05	5457	tags=57%, list=27%, signal=42%	5595/91860/5337/6714/776/8681/5331/5579/778/5603/4214/1432/5606/4216/5594/6416/818/5598/5578/5567/2002/5601/817/2767/775/10746/6655/3708/5330/196883/5338/114/112/1839/4215/2776/51806/3725/2185/113/109/3709/3710/4323/115/1956/1958/4313
hsa04621	NOD-like receptor signaling pathway	156	-0.5434443283463	-1.71735487707452	5.50558642562077e-08	4.47505358185072e-07	1.53056788620496e-07	5277	tags=49%, list=26%, signal=37%	5603/8517/8737/10135/24145/29110/7158/79792/64170/1432/51135/4939/81631/5594/54822/2921/5586/55072/837/29108/22900/79671/7226/7187/4790/6352/5601/596/7124/3454/23118/7189/79184/64127/3708/330/6347/2633/257397/331/51393/5330/10010/115362/10392/3455/2920/140609/6773/3569/4615/3725/7188/11035/834/115361/23710/5027/114548/148022/7128/84674/3428/3716/2919/3553/3709/3606/6041/3710/2635/2634/7099/10628/…
hsa04270	Vascular smooth muscle contraction	116	-0.544325924990443	-1.68838863555589	2.8575158212808e-06	1.43782938943812e-05	4.91769640086754e-06	4491	tags=45%, list=22%, signal=35%	5594/185/552/5588/5578/5567/9475/3779/369/4628/9138/2767/775/9826/5322/10268/3708/136/2977/2768/5330/196883/5739/5320/114/112/4627/10203/2776/79784/51806/23365/5592/10267/4660/113/183/109/5583/10398/1906/3709/3778/3710/4629/4881/115/1909/4638/72/800/59
hsa05143	African trypanosomiasis	33	-0.546642113172529	-1.50205460109946	0.019447057626057	0.0326175516796829	0.0111559283513443	5756	tags=58%, list=28%, signal=42%	5331/5579/3043/6401/5578/3592/7124/5330/3586/2776/3569/4615/3910/3553/8542/3606/355/7412/3383
hsa04612	Antigen processing and presentation	61	-0.547202255074936	-1.61954874727234	0.000550084695502471	0.00149040041431011	0.000509750100195722	5665	tags=49%, list=28%, signal=36%	3310/3306/821/3309/3312/3107/567/3109/6891/925/1514/3106/7124/3303/3133/6892/920/1520/3108/3115/972/3127/3123/3117/3122/4261/3119/3118/3113/3111
hsa04926	Relaxin signaling pathway	121	-0.547817873009607	-1.70310558316217	9.20131419744083e-07	5.40151222331249e-06	1.84743735348227e-06	4797	tags=45%, list=23%, signal=35%	1432/2790/1286/5594/6416/5578/4322/7424/5567/408/4790/1284/5601/7046/2775/2791/2770/6655/1386/4318/59345/1282/5330/196883/1287/6464/2786/114/5293/112/4842/3725/5291/113/109/2788/64764/2769/55970/5295/54331/1906/25759/7040/10000/115/1956/7048/90993/1278/1277/1281/2353/4313/59
hsa04976	Bile secretion	57	-0.548157270697213	-1.61029819022391	0.00118973884663737	0.00294646261237536	0.00100775576647738	4295	tags=42%, list=21%, signal=33%	5243/6548/5567/476/949/2052/483/6550/196883/10257/114/112/57552/6256/113/109/6523/6343/3949/358/8714/115/366/478
hsa04935	Growth hormone synthesis, secretion and action	104	-0.551085509307591	-1.7040598948176	3.99887642078635e-06	1.92067246271102e-05	6.5691271346251e-06	5756	tags=57%, list=28%, signal=41%	5331/8835/2771/5335/5579/208/778/5603/4214/1432/5606/2932/5594/6416/5747/5578/2033/2475/5567/9564/5601/1398/2767/775/2770/6655/1386/3708/3717/5336/5330/196883/1387/6464/114/5293/112/6774/2776/8660/6777/2690/3486/5291/113/6776/109/64764/5295/3667/3709/9021/3726/25759/3710/10000/115/90993/2353
hsa04217	Necroptosis	116	-0.552004748129899	-1.7122067877472	1.2838735271719e-06	7.26764121631239e-06	2.48569498681779e-06	5213	tags=51%, list=25%, signal=38%	841/637/8681/81030/57132/8737/8878/51652/2747/3718/25978/54822/818/8795/2746/55072/5834/197259/29108/2752/5601/823/6778/817/2495/596/7132/7124/8837/3454/8717/330/3717/331/3459/3455/90865/6773/6774/1540/8743/6609/9525/6777/7188/11035/834/5836/6776/7098/114548/148022/7128/3716/3553/824/355/7099/1536
hsa04625	C-type lectin receptor signaling pathway	98	-0.552172069975625	-1.70164869720364	9.77348230325973e-06	3.87274236266667e-05	1.32456404899441e-05	5516	tags=54%, list=27%, signal=40%	5533/208/5603/8517/8915/4775/64170/5743/1432/5594/3659/868/9261/29108/3592/5530/8844/4776/4790/2207/5601/6367/7124/3708/5336/10892/30835/3586/5293/9020/6773/1540/3569/1263/51806/3725/23365/834/5291/114548/602/5295/22808/4773/64581/3553/3709/4046/3710/4772/10000/1959/1960
hsa04925	Aldosterone synthesis and secretion	87	-0.554204251964168	-1.69353754864889	3.26642543426351e-05	0.000120401960774597	4.11801492936526e-05	4457	tags=46%, list=22%, signal=36%	185/818/25865/5578/8913/493/5567/476/949/817/2767/775/5138/483/1386/3708/5330/196883/114/112/3762/2776/4929/51806/5587/57118/113/747/183/109/8912/64764/3709/3949/3710/4881/115/478/3164/90993
hsa04022	cGMP-PKG signaling pathway	146	-0.554405401196139	-1.74772837131986	2.29744247687349e-08	2.09127238793479e-07	7.15261683404559e-08	5756	tags=51%, list=28%, signal=37%	5331/2771/154/146850/3764/2626/5533/490/208/778/6093/4775/153/5594/185/8654/1259/493/5530/476/9475/4776/6722/3779/7408/2767/775/2770/5138/483/1386/3708/3643/2977/2969/2768/5330/196883/624/152/114/112/23533/2776/5294/8660/51806/4205/134/5592/489/113/109/64764/4208/10398/4773/4209/3667/140/3709/5997/5350/3778/3710/4772/4881/10000/115/1909/478/4638/90993/150
hsa04713	Circadian entrainment	83	-0.554625796497016	-1.68966825766968	6.67928400114965e-05	0.000232673959160927	7.95796705747153e-05	4676	tags=47%, list=23%, signal=36%	2790/5594/818/5578/9722/8913/5567/117/2775/817/2791/775/2770/3708/59345/2977/5330/196883/2786/114/112/5187/3762/2776/4842/51806/5592/113/109/2788/8912/55970/54331/8864/3710/8863/51655/115/2353
hsa04810	Regulation of actin cytoskeleton	199	-0.555448450176581	-1.77207192762573	1e-10	2.43846153846154e-09	8.34008097165992e-10	4560	tags=50%, list=22%, signal=39%	2245/85464/5594/5829/60/5747/8394/6548/23191/1729/10787/5155/8874/56034/8976/8396/5305/9475/324/9564/1398/1730/369/4628/9138/5063/81/2247/3655/8516/6655/2149/3693/2254/54434/2768/3695/8826/3672/3675/54961/23396/624/2934/8515/2263/221178/5293/4627/89846/3680/79784/3676/3985/1793/23365/10095/7414/3685/7409/2909/87/5291/3687/4660/3683/1902/10451/5880/3071/3696/55970/4478/5154/5295/22808/10398/3688/2…
hsa04931	Insulin resistance	98	-0.557661400063962	-1.71856536485355	5.07262670661169e-06	2.391989657731e-05	8.18113680047461e-06	3901	tags=45%, list=19%, signal=37%	2475/2997/27330/4790/5170/5601/7132/7124/51422/5770/32/22877/5792/3643/5728/5565/5562/376497/6197/8473/948/5293/6774/5509/9882/3569/8660/28965/5836/6720/2308/79660/5291/183/5465/5507/64764/5295/3667/9021/6196/10000/90993/9945
hsa05134	Legionellosis	56	-0.560786490322503	-1.64245421828758	0.000942372437949717	0.00244862346582017	0.000837483702405702	5751	tags=55%, list=28%, signal=40%	3576/3310/3306/9554/3312/1195/23786/2921/57396/29108/3592/4790/317/1917/7124/3303/2920/840/3569/4615/834/7100/2919/3553/7097/3606/7099/929/3684/3689/718
hsa04670	Leukocyte transendothelial migration	103	-0.562422810789295	-1.73702471362783	1.26791615552654e-06	7.26764121631239e-06	2.48569498681779e-06	6022	tags=67%, list=29%, signal=48%	3702/5290/653361/50848/2771/5906/5335/1499/7122/137075/5579/7430/6494/5603/6093/90952/1432/9071/11069/5829/60/5747/5578/9475/7408/9564/81/2770/7070/4318/5336/394/83692/1500/4689/1003/5293/4688/4267/3676/10411/58494/2185/83700/7414/7409/2909/87/5291/3683/10451/5880/5175/10686/4478/5295/10398/9076/3688/7410/3684/5010/1536/7412/6387/3689/3383/83593/4313
hsa00562	Inositol phosphate metabolism	71	-0.563447496599974	-1.68603972800054	6.96396145929428e-05	0.00023995388941264	8.20695686850471e-05	7238	tags=72%, list=35%, signal=47%	3632/3705/3636/5286/5289/79837/253430/51196/5290/8395/56623/5331/200576/5335/55613/22908/9110/3631/5333/8394/9651/8897/64768/80271/8396/5305/8867/3633/3628/5287/51763/4329/5336/5297/5298/5728/4952/5330/4534/8776/23396/3707/5293/8821/22876/5294/9107/8871/5291/3635/113026
hsa00600	Sphingolipid metabolism	41	-0.563785909031684	-1.59754629116679	0.00334725754305358	0.00707387094098656	0.00241942124164574	5164	tags=59%, list=25%, signal=44%	130367/2720/253782/64781/10825/9517/55512/427/2581/7357/55304/5660/8877/410/2531/340485/10558/259230/6609/123099/8560/129807/81537/166929
hsa04350	TGF-beta signaling pathway	91	-0.565438341701513	-1.73150741854687	5.20729383666934e-06	2.391989657731e-05	8.18113680047461e-06	5235	tags=53%, list=25%, signal=39%	6093/4088/285704/92/4092/5594/3397/4089/2033/4086/353500/6667/57817/64388/7046/7124/656/57154/90/392255/4093/3398/26585/654/79875/9372/25805/1387/659/4609/7042/650/3399/7043/8646/3625/4052/1030/4681/7040/7048/2331/652/10468/7057/3624/2200/1634
hsa04060	Cytokine-cytokine receptor interaction	236	-0.566920439995977	-1.81901835682079	1e-10	2.43846153846154e-09	8.34008097165992e-10	4445	tags=47%, list=22%, signal=38%	729230/8741/8784/3579/8795/2921/10913/3556/1233/3594/3563/353500/6846/3592/10344/2833/50615/84818/6352/3953/4283/8809/3561/132014/8808/7046/6367/7132/7124/656/90/3454/392255/9966/8792/3601/3600/654/6347/27242/10148/3977/6356/3586/1441/3459/659/3455/2920/90865/8764/55504/944/3575/388372/7042/3569/8743/4804/7292/10673/94/58191/1234/3603/3554/650/2690/3557/6372/146433/6351/7133/9466/6348/8742/7043/9…
hsa04613	Neutrophil extracellular trap formation	102	-0.568937306700114	-1.75762298832632	7.00210196730674e-07	4.37044302827393e-06	1.49478874950096e-06	6012	tags=63%, list=29%, signal=45%	6885/1378/5595/2811/8503/83933/6714/5290/653361/10533/5331/51564/5335/2215/5579/208/5603/79885/79792/1432/1182/10013/5594/60/5578/837/2475/4790/10014/51311/1183/5336/5330/4689/2209/5293/9759/1184/4688/27180/7450/6403/834/5291/3683/2357/5880/5295/2359/64581/7097/6404/51284/7099/2212/3684/728/10000/3690/2214/1536/366/3689/718
hsa05135	Yersinia infection	133	-0.570354372694217	-1.78860142232995	1.19953384639129e-08	1.18551698330269e-07	4.05473183729627e-08	5751	tags=62%, list=28%, signal=45%	3576/9844/5335/3984/208/5603/6093/8517/29110/4775/10163/6195/1432/51135/5606/10096/2932/5594/5829/6416/60/5747/8394/5586/9815/29108/8874/147179/27330/8976/925/9475/4790/9564/5601/1398/9138/7124/23118/7189/6347/3586/6197/23396/5293/64283/2776/3569/4615/3676/3654/1793/7454/3725/23365/10095/2185/834/7409/5291/3937/920/114548/10451/5880/148022/5295/4773/3688/3553/7456/3606/8935/7410/4772/7099/2212/61…
hsa04340	Hedgehog signaling pathway	47	-0.571695792023707	-1.64730484339778	0.000959218212339985	0.00247213149033964	0.000845523969799046	5833	tags=64%, list=28%, signal=46%	64750/64399/374654/53944/8945/55733/2932/23288/51684/5727/84976/339745/5567/408/23291/596/57154/2737/50937/2736/23432/132884/1452/1954/894/595/57758/91653/2619/2121
hsa04070	Phosphatidylinositol signaling system	89	-0.572240674208069	-1.75398854866356	2.68974719909841e-06	1.37524171308742e-05	4.70363262321115e-06	7238	tags=72%, list=35%, signal=47%	3632/3705/8760/3636/9677/5286/5289/91860/8503/79837/23262/253430/51196/5290/9807/8395/56623/5331/200576/5335/55613/22908/9110/3631/5579/5333/1606/8394/5578/8897/64768/80271/8396/5305/8867/1609/3633/3628/5287/3708/160851/5336/5297/5298/5728/4952/5330/4534/8776/23396/3707/5293/8821/22876/117283/9107/51806/8871/5291/5295/3709/3635/3710/113026
hsa05412	Arrhythmogenic right ventricular cardiomyopathy	69	-0.573478755507745	-1.71180930341533	2.72677347725577e-05	0.000101692610857656	3.47811353755226e-05	3105	tags=39%, list=15%, signal=33%	775/2697/3655/8516/3693/3695/3908/3672/3675/5318/8515/3680/3676/6443/3685/4000/489/3696/3688/3673/6444/3678/3690/27092/3694/3691/22801
hsa04611	Platelet activation	111	-0.573956900206486	-1.77674864263403	1.68742596097013e-07	1.14437172467668e-06	3.91400589877797e-07	6738	tags=68%, list=33%, signal=46%	5595/2811/9002/8503/5742/2773/6714/10672/5290/8681/51206/5331/2771/5906/146850/208/5603/6093/8773/1432/5584/5594/60/6915/5567/9475/2207/7408/9138/2770/3708/2149/5336/2977/5330/196883/5739/4067/6916/114/5293/695/112/23533/5028/2776/5294/7450/10125/23365/83660/83706/7094/64805/5592/2909/5291/3937/113/109/6786/5295/3688/3709/3710/3673/2212/54518/10000/115/3690/4638/1278/1277/1281
hsa04658	Th1 and Th2 cell differentiation	84	-0.574465168936278	-1.75149699548693	5.63235639326157e-06	2.47980135647766e-05	8.48147234657809e-06	5790	tags=61%, list=28%, signal=44%	919/55534/5335/5533/3559/5603/8517/4775/1432/3109/3516/3718/5594/5588/3594/3592/5530/4790/5601/3561/6778/9794/4851/3717/916/3459/6777/2625/84441/3725/920/6776/3108/3560/4773/3716/3115/3566/4853/4772/3127/3123/3117/864/3122/3119/4094/3118/3113/3111/2353
hsa04924	Renin secretion	59	-0.578083024762519	-1.70842247123922	9.45828814971132e-05	0.000296859142916682	0.000101532431414306	6376	tags=59%, list=31%, signal=41%	1508/2773/776/5331/2771/154/5533/778/153/185/5153/5567/5530/5734/117/775/2770/3708/2977/5330/1636/112/2776/51806/134/183/1906/3709/358/5136/3778/3710/4881/1909/5732
hsa05205	Proteoglycans in cancer	191	-0.58042352747593	-1.8496386998239	1e-10	2.43846153846154e-09	8.34008097165992e-10	4539	tags=51%, list=22%, signal=40%	2017/2065/5594/5829/27250/818/60/5747/5578/2064/5727/6548/3316/2475/5567/3082/11211/9475/7291/5170/2002/1514/369/9138/817/2247/7124/3091/6655/4318/3708/8322/5336/8325/3693/81029/7476/8826/54361/4609/5293/117581/1839/3791/6774/7042/10855/1026/23365/6382/8323/3685/7409/2317/5329/595/5291/960/4660/3059/2817/10451/4478/5295/22808/3688/2316/3709/2099/7097/7410/7483/3339/3710/3673/355/857/7099/8324/367…
hsa00514	Other types of O-glycan biosynthesis	42	-0.580959143784266	-1.64818124563606	0.00178415999283616	0.00401119657963874	0.00137191847153508	6285	tags=60%, list=31%, signal=41%	23509/8985/51809/8693/23275/50614/2590/56913/10585/63917/29071/79695/285203/2589/2591/8473/6480/117248/727936/11227/79623/374378/2683/84620/55568
hsa04216	Ferroptosis	39	-0.582076078918895	-1.63166251458073	0.00176571565663343	0.00401119657963874	0.00137191847153508	1883	tags=33%, list=9%, signal=30%	4891/2495/2730/10162/3162/5621/2182/30061/2180/1536/51703/1356/55240
hsa04936	Alcoholic liver disease	120	-0.58280376360966	-1.81259111050653	2.30897582264093e-08	2.09127238793479e-07	7.15261683404559e-08	6036	tags=62%, list=29%, signal=44%	841/223/10645/2309/3576/1499/208/5603/8517/8737/31/51/29110/6934/1432/51135/5606/2932/6416/2921/8310/114609/3592/7187/4790/84818/5601/7132/7124/51422/23118/7189/8717/32/9663/23643/257397/712/5565/5562/717/6319/2920/23175/9020/3569/4615/224/3654/79966/4217/6720/2308/219/595/64900/217/5465/713/148022/714/2919/3553/23765/355/7099/929/728/125/10000/719/721/720/718
hsa04978	Mineral absorption	53	-0.583229893244469	-1.70124539317067	0.000252369768113298	0.000747674920485191	0.000255721457114311	5421	tags=51%, list=26%, signal=38%	490/4502/4495/113235/54822/493/4489/1317/476/4499/4891/2495/538/483/6550/7779/4493/3162/26872/6523/7421/30061/9843/261729/478/10568/79901
hsa04061	Viral protein interaction with cytokine and cytokine receptor	90	-0.584318010043186	-1.79128371262308	8.7203897655363e-07	5.31608376091348e-06	1.81821891872518e-06	4687	tags=53%, list=23%, signal=41%	3588/1236/57007/729230/3579/8795/2921/1233/6846/10344/2833/6352/4283/8809/3561/6367/7132/7124/6347/6356/3586/2920/8764/388372/3569/8743/1234/6372/146433/6351/7133/6348/414062/6376/3587/3560/1230/2919/3572/3606/1435/8740/6366/53832/6387/9547/1436/1524
hsa04630	JAK-STAT signaling pathway	130	-0.585912378823111	-1.83510479426376	1.15682255838846e-09	1.93006711057442e-08	6.60125892044382e-09	4108	tags=48%, list=20%, signal=39%	3594/2033/3563/2670/2475/3592/5155/5292/50615/3953/3561/6778/596/3454/6655/3717/3601/3600/3977/9306/3586/1441/1387/3459/10254/3455/4609/5293/6773/3575/6774/3569/1154/6777/1026/894/2690/4170/9466/595/5291/5008/1439/6776/10401/5154/5295/3587/3560/3716/3597/9021/3572/3566/1438/3976/5159/10000/53832/1956/316/9180/5156
hsa04927	Cortisol synthesis and secretion	57	-0.58700067911834	-1.72440681128281	9.04054070601338e-05	0.000289479939778408	9.90085797681423e-05	4457	tags=49%, list=22%, signal=39%	185/5151/8913/5567/3776/6667/949/2767/775/1386/3708/5330/196883/114/112/2776/57552/113/183/109/8912/64764/3709/3949/3710/115/3164/90993
hsa04064	NF-kappa B signaling pathway	102	-0.587156132941393	-1.81390656728113	9.04750249569797e-08	6.99526412472258e-07	2.39253596163515e-07	5214	tags=59%, list=25%, signal=44%	8517/8737/8915/1896/5743/51135/79092/472/5588/2921/10913/7185/114609/7187/4790/1647/596/7132/7124/23586/8837/23118/7189/8717/8792/330/5336/10892/23643/257397/331/23085/4067/2920/695/9020/388372/1540/29760/4615/10673/3654/3554/7188/6351/148022/7128/60401/2919/3553/7099/929/8740/6366/4616/7412/6387/3383/5328/84433
hsa04620	Toll-like receptor signaling pathway	88	-0.593415157252896	-1.81698100400741	6.15536990363256e-07	3.98214746826841e-06	1.36198302916037e-06	5403	tags=59%, list=26%, signal=44%	208/5603/8517/8737/29110/1326/1432/51135/5606/5594/6416/114609/3592/3663/7187/4790/6352/5601/4283/7124/3454/23118/7189/51311/23643/3455/5293/388372/3569/4615/10333/3654/3725/6351/942/6348/5291/414062/7098/148022/7100/5295/3553/7097/6696/7096/51284/7099/929/10000/1513/2353
hsa04145	Phagosome	142	-0.597327945085039	-1.88055829214432	1e-10	2.43846153846154e-09	8.34008097165992e-10	3508	tags=46%, list=17%, signal=39%	10312/245973/8417/1514/949/3106/528/4074/8411/338382/3693/3133/11151/523/23673/30835/4689/2213/2209/3920/948/4688/4842/10333/7277/1783/8685/3685/84617/4481/4360/1520/3108/64581/3688/6441/9103/7097/3115/3673/3127/7099/2212/929/3123/3117/3678/3684/81035/3122/9902/3119/3690/2214/3118/1536/4973/3113/3111/715/3689/7057/718/1311/22925/7058
hsa04514	Cell adhesion molecules	132	-0.601323994923195	-1.8852558968155	3.53872917155666e-10	7.47851431588973e-09	2.55781827838832e-09	3268	tags=48%, list=16%, signal=40%	3106/5817/3655/8516/6693/9672/5792/3133/83692/6402/3695/80380/214/1003/57555/914/999/94030/3680/947/4267/3676/9019/23114/58494/6403/6382/83700/3685/5797/942/920/3683/3108/5175/10686/3696/79679/3897/5788/9076/3688/6614/3115/6404/57502/3127/3123/3117/3684/6383/3122/5010/3119/57863/3118/3113/7412/3111/3689/3383/1272/1462
hsa04915	Estrogen signaling pathway	112	-0.604963099006134	-1.87356739818498	1.61004238806279e-09	2.40818929101007e-08	8.23654315039142e-09	3177	tags=43%, list=15%, signal=36%	2775/596/2770/6655/1386/4318/3708/3860/3303/10499/3861/5330/8648/5914/196883/1509/3868/6464/114/5293/112/1839/3762/2776/3866/8202/51806/9568/3725/5291/113/109/64764/5295/7039/3709/2099/25759/2289/3710/2550/10000/115/1956/25984/90993/2353/4313
hsa05152	Tuberculosis	159	-0.606337517602444	-1.91949295488895	1e-10	2.43846153846154e-09	8.34008097165992e-10	5558	tags=60%, list=27%, signal=44%	2215/5868/5533/5878/208/5603/5869/8915/535/64170/1432/51135/3109/3588/5594/818/537/2033/114609/3592/5530/3916/8844/1051/4790/10312/2207/5601/317/817/596/7132/7124/7189/8717/8877/64127/8411/3717/10892/11151/30835/3656/3586/1509/1387/2213/2209/3459/843/3920/7042/3569/1263/4615/10333/3654/51806/23365/7043/4360/3687/1520/3108/3587/7421/64581/3716/3553/4046/9103/7097/3606/3115/7096/972/3127/7099/2212/…
hsa04928	Parathyroid hormone synthesis, secretion and action	97	-0.606407182254942	-1.86885988457072	1.02518257518314e-08	1.09929656766721e-07	3.75983883346247e-08	3882	tags=49%, list=19%, signal=40%	5567/408/1591/6667/369/9138/2767/596/2770/9826/1386/3708/5744/4041/2768/5330/5142/196883/5338/114/112/1839/11214/2776/4929/2625/1026/4205/6256/10893/113/109/64764/4208/7421/4209/3709/860/3710/9935/4323/115/5141/1956/90993/10568/1958/2353
hsa05142	Chagas disease	98	-0.607890291613237	-1.87335756191375	1.22230955438095e-08	1.18551698330269e-07	4.05473183729627e-08	3518	tags=50%, list=17%, signal=42%	4790/6352/5601/7046/2775/2767/7132/7124/2770/8837/7189/2774/6347/5330/712/916/3586/9630/1636/624/3459/5293/7042/2776/3569/4615/10333/3654/3725/6348/5291/7043/414062/713/148022/2769/714/5521/5295/3553/7097/355/7099/7040/10000/7048/5054/2353/718
hsa04923	Regulation of lipolysis in adipocytes	47	-0.608400046852951	-1.75306580507898	9.91456357500381e-05	0.00030812908365453	0.000105387001880845	6527	tags=72%, list=32%, signal=49%	8503/5742/3991/2773/5290/51099/2771/154/364/208/153/5743/5567/2770/5346/3643/196883/114/5293/112/8660/134/5592/5291/113/109/5295/3667/5733/4881/10000/115/2167/11343
hsa04659	Th17 cell differentiation	98	-0.610187737967805	-1.88043768568082	8.56274564249415e-09	9.69425131668088e-08	3.31564962848458e-08	5790	tags=67%, list=28%, signal=49%	919/5335/50943/4087/5533/3559/5603/8517/4088/4775/1432/3109/3718/5594/4089/5588/6095/3556/3594/2475/5530/50615/4790/5601/6097/3561/6778/7046/3091/3717/10148/916/5914/3459/6774/3569/196/6777/2625/3554/3725/6256/9466/920/6776/3108/3560/4773/3716/3553/3572/3115/3566/4772/3127/3123/3117/7040/3122/3119/3118/3113/7048/3111/861/2353
hsa04933	AGE-RAGE signaling pathway in diabetic complications	99	-0.610651541166457	-1.88512675807633	1.23413439902173e-08	1.18551698330269e-07	4.05473183729627e-08	5756	tags=64%, list=28%, signal=46%	5331/3576/5335/4087/5579/208/5603/4088/6401/5333/1432/1286/5594/185/4089/5578/7424/1729/5292/4790/1284/5601/7046/596/7124/3717/5336/1282/6347/5330/1287/5293/6774/7042/3569/6777/3725/2308/595/5291/7043/6776/183/5295/3553/1906/4772/7056/7040/10000/1536/7412/7048/2152/3383/113026/1278/1277/1958/1281/5054/4313/2335
hsa05145	Toxoplasmosis	107	-0.611059938076784	-1.88744644543232	9.70212600781013e-10	1.70865219137545e-08	5.8439706362833e-09	3518	tags=65%, list=17%, signal=54%	2771/146850/3310/3306/208/5603/3312/8517/1432/51135/5606/3109/3588/3915/5594/3592/4790/5170/5601/2775/596/7132/7124/2770/3655/23118/7189/330/3717/3303/23643/331/3908/3586/3914/3911/3459/23533/6774/7042/5294/4615/3654/1234/3913/7043/3108/3587/3910/3909/3716/3688/3949/7097/3115/3918/3127/7099/3123/3117/7040/3122/4261/10000/3912/3119/3118/3113/3111/240
hsa05414	Dilated cardiomyopathy	83	-0.615111629687636	-1.87393843231065	6.73990406538357e-08	5.34137397181648e-07	1.82686873351186e-07	3107	tags=47%, list=15%, signal=40%	7124/775/3655/8516/3693/3695/3908/3672/3675/196883/8515/114/112/7042/3680/3676/6443/3685/4000/489/7043/113/183/109/7139/3696/3688/7168/5350/3673/6444/3678/7040/115/3690/27092/3694/3691/22801
hsa04614	Renin-angiotensin system	19	-0.616076837657204	-1.52601221127381	0.018993121438901	0.0320256356177213	0.0109534798891758	4667	tags=58%, list=23%, signal=45%	2028/185/4012/3816/5476/10159/1636/4311/1359/183/290
hsa04668	TNF signaling pathway	109	-0.618827248804755	-1.9140915565809	2.24296273293567e-10	5.07870847386148e-09	1.73703128941634e-09	5403	tags=62%, list=26%, signal=46%	208/5603/8517/8737/6401/1326/8986/5743/1432/5606/5594/6416/2921/3659/7424/7185/197259/1051/7187/4790/6352/5601/8809/7132/7124/8837/23118/8717/64127/1386/4318/330/3600/6347/257397/153090/843/2920/5293/840/9020/3569/3725/7188/11035/4217/6372/7133/5291/602/64764/6376/7128/5295/2919/3553/1906/9021/3726/355/1435/3976/4323/10000/7412/3383/90993/2353
hsa00601	Glycosphingolipid biosynthesis - lacto and neolacto series	25	-0.620962000500615	-1.62946713310599	0.00343303535319005	0.00720710070835261	0.00246498878618735	3109	tags=40%, list=15%, signal=34%	6489/8707/2525/6484/28/10678/10331/2683/53947/2524
hsa04392	Hippo signaling pathway - multiple species	28	-0.62220127171358	-1.66262812181122	0.00167234681021616	0.00389385937870335	0.00133178653829137	5706	tags=71%, list=28%, signal=52%	8994/166824/84962/6788/92597/83937/9113/55233/54798/4771/60485/79633/126374/7003/25937/23286/8642/26524/9770/122786
hsa05416	Viral myocarditis	55	-0.626906981758467	-1.83728996052838	5.24332407042206e-06	2.391989657731e-05	8.18113680047461e-06	4931	tags=60%, list=24%, signal=46%	3107/940/1981/3109/1756/60/25/1605/27/3106/8672/3133/3908/1604/6443/942/595/3683/3108/5880/3115/857/3127/6444/3123/3117/3122/3119/3118/3113/3111/3689/3383
hsa00770	Pantothenate and CoA biosynthesis	19	-0.627428664947675	-1.55413050108228	0.0151020361623485	0.0261603577238496	0.00894742435848084	1599	tags=32%, list=8%, signal=29%	224/219/217/8876/5167/1806
hsa05410	Hypertrophic cardiomyopathy	79	-0.627797951603266	-1.90478543712035	4.25543730405614e-08	3.64587466320486e-07	1.24697024841474e-07	3107	tags=48%, list=15%, signal=41%	7124/775/3655/51422/8516/3693/3695/3908/3672/5565/3675/5562/1636/8515/7042/3680/3569/3676/6443/3685/4000/489/7043/183/7139/3696/3688/7168/1906/3673/6444/3678/7040/3690/27092/3694/3691/22801
hsa04380	Osteoclast differentiation	124	-0.627799222406311	-1.95659371423797	1e-10	2.43846153846154e-09	8.34008097165992e-10	3840	tags=51%, list=19%, signal=42%	10326/5530/11024/4790/7305/10288/5601/7046/11027/7132/7124/3454/23118/7189/8792/5336/11006/4689/2213/2209/3459/3455/5293/695/9020/6773/7042/1540/4688/4286/5468/29760/10859/6688/3554/3725/2355/5291/3937/5295/126014/4773/3716/2274/3553/9021/9103/3726/54209/4772/4982/1435/2212/7040/10000/3690/2214/7048/140885/1436/1513/2353/2354
hsa04510	Focal adhesion	192	-0.630197945474279	-2.00823161477449	1e-10	2.43846153846154e-09	8.34008097165992e-10	4626	tags=60%, list=23%, signal=47%	3915/1286/2932/5594/5829/60/5747/8394/5578/2064/7424/1729/5155/3082/56034/9475/5923/1284/5170/7408/2002/9564/5601/1398/5063/596/81/3655/3611/8516/6655/330/1282/3693/394/2324/331/5728/3695/2889/3908/64098/3672/3675/3914/23396/3911/1287/8515/6464/5293/3791/3680/3676/7450/1101/1793/3725/894/55742/83660/7414/3685/7094/7148/7409/2317/2909/3913/595/87/5291/4660/3381/10451/5880/3696/5154/5295/10398/3910…
hsa05323	Rheumatoid arthritis	85	-0.630882599362581	-1.92263723615977	1.0403437548901e-08	1.09929656766721e-07	3.75983883346247e-08	3508	tags=52%, list=17%, signal=43%	10312/6352/245973/1514/7124/528/8792/3600/6347/523/2920/284/7042/3569/10673/3725/6372/942/6348/7043/414062/3683/3108/2919/3553/7097/3606/3115/1435/3127/7099/3123/3117/7040/3122/3119/3118/3113/3111/6387/3689/3383/1513/2353
hsa04940	Type I diabetes mellitus	37	-0.637550373553191	-1.77082027575087	7.49143841813731e-05	0.000252636806228673	8.6407408406287e-05	5257	tags=62%, list=26%, signal=46%	1363/3107/940/3109/3382/3592/3106/7124/3133/5799/942/3108/3553/3115/355/3127/3123/3117/3122/3119/3118/3113/3111
hsa05146	Amoebiasis	90	-0.640511022014095	-1.9635488582743	4.35288744650065e-10	8.62415825337941e-09	2.94965399335241e-09	4626	tags=61%, list=23%, signal=48%	3915/1286/5747/2921/5578/3592/5567/4790/1284/2767/81/7124/909/2774/338382/1282/911/5272/5330/3908/3586/9630/3914/3911/1287/2920/913/5293/7042/2776/3569/3554/7414/3913/87/5291/7043/2769/5295/3910/3909/2919/3553/7097/3918/7099/929/3684/7040/3912/3689/1278/1277/1281/2335
hsa04974	Protein digestion and absorption	84	-0.640834243970502	-1.95385084007413	1.73136637457991e-09	2.40818929101007e-08	8.23654315039142e-09	2715	tags=42%, list=13%, signal=36%	1282/6550/3784/9056/1287/4311/169044/1306/206358/1359/5222/1305/23428/7373/3783/85301/6505/1803/91522/2006/1291/1292/478/1307/1303/1278/1293/1301/1290/1277/1281/1289/1296/1295/1300
hsa04640	Hematopoietic cell lineage	85	-0.64554738292752	-1.96732868742291	1.24911841711021e-09	1.97985269111968e-08	6.77153668222904e-09	4205	tags=58%, list=20%, signal=46%	921/3563/928/945/925/966/7124/3655/909/911/916/3672/3675/1441/2209/4311/914/948/913/3575/947/3569/1604/3676/951/3554/920/960/3108/3553/3115/3566/3673/1435/3127/929/3123/1438/3117/3678/3684/3122/3119/3690/3118/3113/3111/290/1436
hsa05320	Autoimmune thyroid disease	32	-0.645783874519805	-1.764023185686	0.000216795027252206	0.000654514510847136	0.000223858524380724	1228	tags=47%, list=6%, signal=44%	3106/3133/3586/942/3108/3115/355/3127/3123/3117/3122/3119/3118/3113/3111
hsa04710	Circadian rhythm	29	-0.648738453084233	-1.7443356887973	0.00042273477845546	0.00118590198911842	0.000405604864284233	3465	tags=55%, list=17%, signal=46%	9575/23291/6097/51422/26224/1408/5565/5562/5187/9572/406/8864/8553/4862/79365/8863
hsa00512	Mucin type O-glycan biosynthesis	31	-0.651446822652511	-1.77214425471751	0.000297925309272484	0.000858566573085251	0.000293648869426468	6068	tags=71%, list=30%, signal=50%	51809/8693/50614/2590/56913/51301/27090/63917/29071/2650/79695/2589/2591/10610/9334/117248/10331/11227/79623/374378/55568/6482
hsa05330	Allograft rejection	31	-0.652855128322943	-1.77597529773738	0.000282904228044337	0.000822758167798668	0.000281401598151296	4931	tags=65%, list=24%, signal=49%	3107/940/3109/3592/3106/7124/3133/3586/942/3108/3115/355/3127/3123/3117/3122/3119/3118/3113/3111
hsa05133	Pertussis	72	-0.660524135501953	-1.97997193523212	1.74726667801993e-09	2.40818929101007e-08	8.23654315039142e-09	4797	tags=62%, list=23%, signal=48%	1432/51135/5594/3659/722/114609/29108/3592/4790/5601/7124/2770/7189/23643/712/3586/717/10392/840/3569/4615/3654/51806/3394/3725/834/710/6372/114548/713/148022/714/3688/3553/7099/929/3678/3684/721/715/3689/716/720/2353/718
hsa00340	Histidine metabolism	20	-0.66274123340956	-1.65880611904537	0.00239564931708395	0.00527375578830286	0.00180374181037753	3325	tags=50%, list=16%, signal=42%	26/218/4128/224/4129/219/222/217/221/3176
hsa05140	Leishmaniasis	72	-0.664856621976114	-1.99295889690021	9.66833839007258e-10	1.70865219137545e-08	5.8439706362833e-09	3518	tags=58%, list=17%, signal=49%	4790/2002/1917/7124/23118/7189/3717/4689/3586/2209/3459/7042/4688/4615/3676/3654/3725/7043/3108/3716/3688/3553/9103/7097/3115/3127/7099/2212/3123/3117/3684/7040/3122/3119/2214/3118/1536/3113/3111/3689/2353/718
hsa00532	Glycosaminoglycan biosynthesis - chondroitin sulfate / dermatan sulfate	20	-0.671204246770527	-1.67998859214503	0.00177178764581535	0.00401119657963874	0.00137191847153508	3184	tags=55%, list=16%, signal=47%	79586/54480/50515/55454/55790/10090/29940/9469/64131/337876/51363
hsa05332	Graft-versus-host disease	32	-0.674409158284225	-1.84221600877999	4.07873966225942e-05	0.000146927326470027	5.02524144991292e-05	3268	tags=53%, list=16%, signal=45%	3106/7124/3133/3569/942/3108/3553/3115/355/3127/3123/3117/3122/3119/3118/3113/3111
hsa04672	Intestinal immune network for IgA production	39	-0.675121428736393	-1.89248513717542	7.00123580086984e-06	2.92662539986239e-05	1.00097099845866e-05	2806	tags=54%, list=14%, signal=47%	3601/3600/3695/3586/9020/3569/3676/10673/942/3108/3115/3127/3123/3117/7040/3122/3119/3118/3113/3111/6387
hsa05322	Systemic lupus erythematosus	46	-0.69864059957736	-2.0065181948628	1.32420388792821e-07	9.5402871016646e-07	3.26299044154559e-07	2465	tags=57%, list=12%, signal=50%	712/3586/717/2209/942/87/3108/713/714/3115/3127/2212/3123/3117/3122/3119/2214/3118/3113/3111/721/730/715/716/720/718
hsa04512	ECM-receptor interaction	80	-0.698765233071538	-2.12172653342133	1e-10	2.43846153846154e-09	8.34008097165992e-10	3211	tags=61%, list=16%, signal=52%	375790/3655/8516/1282/3693/9900/3695/3908/3672/3675/3914/3911/1287/8515/948/3680/3676/7450/1101/6382/3685/7148/3913/960/3381/3696/3910/3909/3688/3339/3918/3371/3673/6696/3678/3912/3690/1291/1292/3694/3691/7057/1278/1293/1277/22801/1311/2335/7058
hsa04610	Complement and coagulation cascades	68	-0.700556972907551	-2.09046509334799	1e-10	2.43846153846154e-09	8.34008097165992e-10	3854	tags=62%, list=19%, signal=50%	4179/10544/7035/5345/966/2159/2149/712/2157/717/624/1604/7450/1675/710/5329/3687/713/5055/714/629/7056/1191/3684/2/728/11326/719/5265/2152/721/730/715/3689/5627/3075/716/5328/720/5054/2162/718
hsa05321	Inflammatory bowel disease	53	-0.700998252220393	-2.04476838554425	7.42055179529105e-09	8.71227747817504e-08	2.97979272871336e-08	4241	tags=72%, list=21%, signal=57%	6095/3594/3592/50615/4790/6097/8809/3561/6778/7124/64127/3586/3459/6774/7042/3569/2625/3725/7043/3108/7100/3553/7097/3606/3115/3566/4772/3127/7099/3123/3117/7040/3122/3119/4094/3118/3113/3111
hsa00533	Glycosaminoglycan biosynthesis - keratan sulfate	14	-0.710998386500094	-1.65477269087499	0.00466930125695905	0.00930333523859974	0.00318194763266071	2885	tags=50%, list=14%, signal=43%	9435/4166/93010/8534/10678/2683/6482
hsa05144	Malaria	46	-0.731623388105544	-2.10124582068236	3.02163584282924e-09	3.83143424870748e-08	1.31043575499542e-08	2278	tags=57%, list=11%, signal=50%	3586/948/7042/3569/4615/6403/6382/7043/3683/5175/2532/3553/7097/3606/7099/2995/7040/6383/4233/7412/3689/4035/3383/7057/1311/7058
hsa05310	Asthma	21	-0.76640471848254	-1.92880989015886	8.15741192729205e-06	3.31525587301484e-05	1.13389126654667e-05	3453	tags=71%, list=17%, signal=59%	2207/7124/6356/3586/3108/3115/3127/3123/2205/3117/3122/3119/3118/3113/3111
hsa05150	Staphylococcus aureus infection	61	-0.798748902091403	-2.36404870734704	1e-10	2.43846153846154e-09	8.34008097165992e-10	2805	tags=74%, list=14%, signal=64%	3860/3861/712/3586/717/3868/2213/2209/3866/1675/6403/3683/5724/3108/713/2357/1672/714/2359/629/9103/3115/6404/3127/2212/3123/3117/3684/728/3122/3119/2214/3118/719/3113/3111/721/715/3689/25984/3383/3075/716/720/718
