# Supplementary material for: Identifying the Role of Oxidative Stress-Related Genes as Prognostic Biomarkers and Predicting the Response of Immunotherapy and Chemotherapy in Ovarian Cancer
Source: Oxid Med Cell Longev. 2022 Dec 12;2022:6575534. doi: 10.1155/2022/6575534 (PMC9764017; doi:10.1155/2022/6575534)
Supplement: Supplementary 14 — Supplement Table 13: signaling pathway analysis in regard to SCGB1A1. [file 6575534.f14.txt]

ID	Description	setSize	enrichmentScore	NES	pvalue	p.adjust	qvalues	rank	leading_edge	core_enrichment
hsa05310	Asthma	21	0.668880457514143	1.80520015095942	0.000291338412684972	0.00127411999147561	0.000629699867417343	4497	tags=67%, list=22%, signal=52%	3127/3118/3117/3119/3122/3111/3113/6356/3109/3586/3115/2207/3123/959
hsa05320	Autoimmune thyroid disease	32	0.630881602078173	1.86483374725483	8.30868827017047e-05	0.000436259593870052	0.000215609683748357	5185	tags=66%, list=25%, signal=49%	3127/3118/5551/355/3117/3002/3119/942/3122/3111/3113/356/3109/1493/3586/7253/3115/3123/959/940/3133
hsa04659	Th17 cell differentiation	98	0.617191822141549	2.15466568672599	1e-10	6.56e-09	3.24210526315789e-09	4597	tags=61%, list=22%, signal=48%	3560/3127/3118/6776/7040/920/2475/916/3117/3716/5335/4772/7297/3717/3572/3459/3561/7535/3119/7048/3554/3553/919/3122/861/3111/3725/3559/5914/3113/3551/3932/50615/3566/4775/196/5530/4790/6772/3662/3109/5588/6778/3594/3569/4087/5533/3115/915/4089/3123/5600/6097/6257/1432/5970/5532/6777/30009/3718
hsa00515	Mannose type O-glycan biosynthesis	18	0.595473784159746	1.54473025833642	0.0177926295450704	0.0397005611617896	0.0196209448617317	5791	tags=61%, list=28%, signal=44%	6487/55624/84197/8704/9486/10585/84892/29954/148789/2683/79147
hsa05321	Inflammatory bowel disease	53	0.592350539452806	1.9156851066883	6.32903964268697e-06	5.3228846225675e-05	2.63069394055005e-05	4573	tags=64%, list=22%, signal=50%	3127/3118/7040/7099/3117/7043/4772/7042/3459/3561/3119/4094/7097/3553/3122/3111/3725/3113/50615/3566/4790/6772/3109/8809/6778/3594/3586/3569/4087/3115/3123/6097/5970/30009
hsa05140	Leishmaniasis	72	0.589935429583359	1.99987999946837	1.3937065402128e-07	2.28567872594899e-06	1.12963582733037e-06	4398	tags=61%, list=21%, signal=48%	2214/3127/3118/3689/1536/7040/2212/3684/7099/3676/3117/3716/7043/3688/3717/7042/3459/3119/4689/7097/3553/23118/3122/2209/4615/3111/3725/3113/9103/4688/4790/6772/65108/3109/3586/718/10454/3115/51135/3123/5600/653361/1432/5970
hsa05340	Primary immunodeficiency	32	0.588851844172857	1.74059726504866	0.000950796387553273	0.00324855432414035	0.00160551144389478	4597	tags=56%, list=22%, signal=44%	4261/5788/920/916/925/3561/7535/695/5993/3575/3932/29851/973/6890/915/64421/959/3718
hsa04933	AGE-RAGE signaling pathway in diabetic complications	99	0.58760913083439	2.05857475364466	3.41974151290224e-10	1.5831937243378e-08	7.82451327175934e-09	4526	tags=56%, list=22%, signal=44%	2335/5054/3383/10000/1281/1536/6776/7040/1958/4313/7412/1729/1282/7043/5335/4772/1284/3717/7042/5293/7048/1277/3553/7422/177/5292/3725/7424/5290/5336/6347/5330/5590/1288/8503/7056/5333/4790/5291/6772/5295/183/1285/208/1287/1027/3569/4087/4893/4089/1286/5600/1432/5970/6777
hsa04380	Osteoclast differentiation	124	0.579483978193729	2.07452628156229	1e-10	6.56e-09	3.24210526315789e-09	4407	tags=56%, list=21%, signal=45%	2214/1436/10000/7040/4982/140885/1513/2534/3455/1435/2212/3937/10379/6773/3716/2354/4772/7297/11006/7042/3459/10859/4689/5293/7048/3554/9020/695/3553/9846/23118/10288/54209/126014/2209/3725/3690/6850/6688/5290/3551/9103/3932/5336/4688/7132/5530/8503/2274/4286/4790/5291/6772/5295/2355/79168/7186/208/55423/10454/1540/5533/5600/5609/653361/11025/1432/2213/5970/5532
hsa05144	Malaria	46	0.57942962360958	1.83992818544478	6.49764625962698e-05	0.000363475391268763	0.000179638030344639	4125	tags=54%, list=20%, signal=44%	7058/3383/4035/3689/7040/948/5175/3683/7057/7099/7412/7043/7042/7097/3553/4615/4233/6347/7059/3820/3082/3586/3569/1311/3043
hsa04640	Hematopoietic cell lineage	85	0.575662957987767	1.97510212622479	2.71846502377391e-08	6.36897519855602e-07	3.14769634331716e-07	3733	tags=52%, list=18%, signal=43%	1436/3127/3118/3590/948/1435/3684/914/920/929/916/3676/3117/925/947/3119/3554/3553/3574/3122/960/951/2209/2057/3111/3690/3559/3575/3113/3678/290/3675/1438/3566/921/952/945/3673/3109/4254/3672/3569/3115/915
hsa04923	Regulation of lipolysis in adipocytes	47	0.5752792504518	1.83635547298329	0.000140267447603354	0.000697086709301516	0.00034451653797315	4955	tags=57%, list=24%, signal=44%	4881/10000/109/114/134/5293/2770/3667/5290/57104/8503/5592/5291/112/5295/2167/4886/208/2771/113/7253/196883/5733/5567/5743/2773/115
hsa04672	Intestinal immune network for IgA production	39	0.574861049773351	1.76095259285067	0.000399260911084195	0.00155901879566209	0.000770503512618622	4497	tags=59%, list=22%, signal=46%	3127/3118/7040/3600/3676/3117/10673/6387/3601/3119/942/9020/3122/3695/3111/3113/29851/3109/3586/3569/3115/3123/959
hsa04512	ECM-receptor interaction	80	0.568794805644619	1.9411039526967	4.62304969935286e-07	5.83215500533745e-06	2.8823872619447e-06	3435	tags=51%, list=17%, signal=43%	3339/2335/3679/255743/7058/22801/948/3910/7057/375790/3685/3913/3911/3693/3676/3696/3371/1282/3909/3688/1284/9900/80144/1299/1277/6696/3695/960/3690/1298/3678/3675/3673/7450/1288/7059/1285/3672/3912/1287/5649
hsa04658	Th1 and Th2 cell differentiation	84	0.567687902030044	1.94630020146688	4.46467151389765e-08	9.19497282099949e-07	4.54437039292016e-07	4718	tags=60%, list=23%, signal=46%	3560/3127/3118/6776/55534/920/916/3117/3716/5335/4772/7297/3717/4853/3459/3561/7535/3119/4094/54567/919/3122/3111/3725/3559/3113/3551/3932/3566/4775/5530/4790/6772/3109/5588/6778/3594/5533/3115/915/3123/5600/1432/5970/5532/6777/30009/3718/9794/3516
hsa03430	Mismatch repair	23	0.565804559689208	1.57476926103122	0.0127344625754292	0.0293980451412191	0.0145292007437348	4183	tags=48%, list=20%, signal=38%	6118/5985/5424/5395/5981/4292/4437/3978/4436/6117/2956
hsa04611	Platelet activation	111	0.564495023883955	1.9991034278976	1.74669051831771e-09	5.20831354552916e-08	2.57407023752083e-08	4475	tags=55%, list=22%, signal=43%	5321/10000/1281/109/114/3710/2534/83706/2212/3937/7094/54518/3688/5293/6786/1277/10125/695/2770/4638/9138/8681/5739/8773/23533/146850/3690/6850/5290/3708/5336/5908/5330/3673/4659/5590/7450/6915/8503/5592/5291/112/8605/5295/6916/5028/208/2771/5294/113/2909/3709/5501/196883/9475/2207/5600/85366/1432/2977/5567
hsa05332	Graft-versus-host disease	32	0.556871507986748	1.64606604085072	0.00418415147753745	0.0110300769211696	0.00545132171328664	4127	tags=53%, list=20%, signal=43%	3127/3118/5551/355/3117/3002/3119/942/3553/3122/3111/3113/356/3109/3569/3115/3123
hsa04613	Neutrophil extracellular trap formation	102	0.549387998533274	1.92858796282099	4.48535259560951e-08	9.19497282099949e-07	4.54437039292016e-07	5197	tags=56%, list=25%, signal=42%	366/2214/10000/2359/3689/1536/2357/3683/2212/728/3684/7099/2475/5335/834/4689/5293/7097/27180/5880/6404/177/64581/2209/51564/51311/3690/6850/5290/1182/51284/5336/4688/5330/7450/9734/10533/8503/5894/4790/9759/5291/5295/208/1183/718/5600/3065/653361/1432/5970/10014/79792/8841/5578/727/60
hsa04666	Fc gamma R-mediated phagocytosis	91	0.545342131873301	1.88482957989382	3.55637205497336e-07	4.66596013612505e-06	2.30602651143536e-06	5040	tags=52%, list=25%, signal=39%	2214/5321/10000/10163/55616/5788/2212/3636/3635/5335/7454/5338/8877/5293/9846/5880/8681/8394/3055/2209/8398/6850/7409/5290/1793/5336/8853/8503/23396/5894/3984/5291/8605/5295/1785/65108/4082/208/50807/7410/653361/2934/2213/10095/4651/8936/5578
hsa05330	Allograft rejection	31	0.539245435955377	1.58667743109329	0.00643329205724788	0.0161077846929565	0.00796084352604398	5185	tags=61%, list=25%, signal=46%	3127/3118/5551/355/3117/3002/3119/942/3122/3111/3113/356/3109/3586/3115/3123/959/940/3133
hsa04510	Focal adhesion	192	0.53602252672025	1.98375720205415	1e-10	6.56e-09	3.24210526315789e-09	5278	tags=55%, list=26%, signal=41%	2335/894/2316/2318/3679/7058/10000/5159/22801/7791/857/3910/7057/2317/2534/3685/3913/3911/3693/7094/3676/3696/3371/1729/1282/3909/3688/1284/80310/1299/5293/5829/1277/5880/7422/4638/3791/8394/896/3611/6696/3695/3725/3690/2064/7424/1298/7409/3678/5290/4660/1793/3675/4233/5908/25759/54776/3673/4659/7450/1288/58498/824/8503/7059/23396/5894/5291/5295/81/3082/1285/208/3672/3912/1287/2321/5170/5649/6464…
hsa04664	Fc epsilon RI signaling pathway	60	0.535463309510328	1.75737775149384	0.000183510610031662	0.000853005867166066	0.00042157542857373	4270	tags=50%, list=21%, signal=40%	5321/10000/2534/241/3937/3635/5335/240/5293/695/9846/5880/8681/6850/7409/5290/5336/8503/5894/5291/8605/5295/208/5170/4893/7410/2207/5600/5609/1432
hsa05235	PD-L1 expression and PD-1 checkpoint pathway in cancer	88	0.533405703754339	1.83515497771372	2.8629068900275e-06	2.93447956227818e-05	1.45028835876393e-05	5792	tags=59%, list=28%, signal=43%	10000/7099/920/2475/916/3716/4215/5335/4772/3717/3459/7535/5293/7097/10125/919/148022/4615/29126/3725/5290/3551/3932/4775/5530/8503/5894/27436/4790/5291/6772/5295/5588/208/5533/5781/915/4893/5728/5600/1432/5133/5970/5532/3091/940/1956/6198/55509/238/8517/6774
hsa04392	Hippo signaling pathway - multiple species	28	0.529249482439998	1.51823659332752	0.0223583625285583	0.0488902860624475	0.0241627216098104	5612	tags=54%, list=27%, signal=39%	7003/11186/8642/9770/83937/55233/92597/25937/4771/8994/126374/84962/122786/9113/26524
hsa04061	Viral protein interaction with cytokine and cytokine receptor	90	0.525564948238838	1.81307963469984	3.70062146302649e-06	3.42142424186496e-05	1.69094779604366e-05	3868	tags=42%, list=19%, signal=34%	3560/4283/1436/3627/3587/58985/146433/7133/1435/6352/6387/8795/3572/6348/3561/6846/1230/2833/1234/729230/3559/6373/6356/6351/6366/7132/6347/1524/8797/414062/8740/8809/3586/3569/2920/8743/4049/388372
hsa04620	Toll-like receptor signaling pathway	88	0.525445646629338	1.80776880926255	8.13286856257252e-06	6.35138306791378e-05	3.13900190134378e-05	5909	tags=59%, list=29%, signal=42%	4283/3627/10000/1513/3455/7099/929/6352/6348/5293/942/7096/7097/3553/23118/148022/3665/6696/4615/51311/3725/6373/5290/51284/3551/6351/8503/29110/4790/5291/6772/5295/7098/414062/208/3569/10454/388372/51135/5600/5609/1432/5970/10333/6416/3454/8737/54472/7187/8517/941/1326
hsa04630	JAK-STAT signaling pathway	130	0.523389308381356	1.88072678343342	8.2787465402503e-08	1.50857159177894e-06	7.45571325847103e-07	5531	tags=54%, list=27%, signal=40%	894/3560/2273/10000/5159/6776/3587/58985/3590/3600/163702/4609/3455/5008/2475/1439/10379/6773/3716/7297/3717/3601/3572/3459/3561/9180/5293/4170/5292/3574/896/2057/3559/3575/5290/50615/1438/3566/3976/8503/1387/3953/5894/5291/6772/5295/3598/6778/208/3594/3586/3569/3977/5781/30837/2670/9655/1271/6777/3718/8027/2690/1956/9063/3454/3563/5156/6654/1489/51588
hsa05142	Chagas disease	98	0.520940624599644	1.81864510899017	2.2746361350099e-06	2.40671178155886e-05	1.1894531911427e-05	4831	tags=51%, list=24%, signal=39%	5054/10000/7040/714/713/7099/355/916/6352/7043/712/7042/6348/3459/5293/7048/7097/3553/2770/919/148022/4615/3725/5290/3551/356/7132/6347/5330/8503/4790/5291/5295/414062/208/3586/3569/718/4087/2771/915/8837/51135/5600/2775/1432/5970/10333/2773/6416
hsa00562	Inositol phosphate metabolism	71	0.519245238697642	1.7533789064223	6.53812441611495e-05	0.000363475391268763	0.000179638030344639	6197	tags=59%, list=30%, signal=41%	3636/3635/5335/3633/5298/8821/5293/8394/5305/8396/3612/4952/5290/5336/9110/5330/3707/8776/8867/23396/5333/5291/8871/5294/55586/5297/79837/200576/5728/64768/22908/55300/5289/56623/9896/27124/3631/84812/9108/22876/55361/23007
hsa05416	Viral myocarditis	55	0.517502305646985	1.68512689209393	0.00064399546152778	0.00232121441078145	0.00114719839300495	5197	tags=53%, list=25%, signal=39%	3383/3127/3118/3689/8672/3683/5551/857/2534/3117/842/3119/942/5880/3122/3111/3113/25/1982/3109/1981/3115/1756/3123/959/6443/940/3133/60
hsa05322	Systemic lupus erythematosus	46	0.513228213648716	1.62971138751101	0.002007362624787	0.00598559037209215	0.00295821860494926	5381	tags=63%, list=26%, signal=47%	2214/3127/3118/714/2212/713/3117/712/720/721/3119/942/3122/2209/3111/3113/715/6737/81/3109/3586/718/3115/87/3123/959/940/727/716
hsa05222	Small cell lung cancer	91	0.511489651062972	1.76782751191694	9.13820976473704e-06	6.81212000644034e-05	3.36670886069259e-05	3413	tags=42%, list=17%, signal=35%	2335/10000/4609/3910/3685/3913/3911/317/7709/1282/3909/3688/1284/842/7188/5293/898/7185/1870/5290/3551/1017/1021/3675/3673/1288/8503/4790/5291/5295/51426/7186/1285/208/3912/1287/1027/1030
hsa04940	Type I diabetes mellitus	37	0.511430323869715	1.55924406483361	0.00769881238450261	0.0187052626823471	0.00924457783402263	6550	tags=65%, list=32%, signal=44%	3127/3118/5551/355/1363/3117/3002/3119/942/3553/3122/3111/3113/356/3109/3115/4049/3123/940/3133/2571/941/3382/3134
hsa05135	Yersinia infection	133	0.511174750427025	1.84375612685322	1.26849696452359e-07	2.18982633875652e-06	1.08226333815309e-06	4863	tags=50%, list=24%, signal=38%	2335/10000/10163/2212/7099/3937/920/7456/3676/3688/5335/4772/2185/7454/9815/925/834/7535/5293/6195/5829/114548/3553/5880/23118/9138/8394/5585/148022/4615/3725/7409/64283/3678/5290/3551/3932/5586/1793/58484/6347/4775/8503/23396/29110/4790/3984/6196/5291/5295/7186/208/3586/3569/10454/7410/9475/51135/5600/5609/1432/5970/10095/63916/6416/6197
hsa04650	Natural killer cell mediated cytotoxicity	101	0.511028886231643	1.78935850166464	3.75522172887618e-06	3.42142424186496e-05	1.69094779604366e-05	5278	tags=50%, list=26%, signal=37%	2214/3383/3689/3683/5551/2534/3455/6452/3937/355/5335/4772/2185/8795/3459/3002/7535/5293/5880/962/919/6850/7409/5290/3932/5336/25759/356/5530/8797/8503/5894/5291/5295/6464/8743/5533/5781/4893/7410/673/2207/5532/4068/4277/5578/3454/259197/3133/6654
hsa00310	Lysine degradation	55	0.510703578625868	1.66298840573305	0.000988806045797951	0.00334359157754359	0.00165248107490922	7732	tags=71%, list=38%, signal=44%	2145/10157/9757/80854/8085/7799/23067/224/84444/9739/79709/58508/79813/5352/1962/51268/9869/5351/55870/55904/3030/2146/8985/29072/4297/55526/2639/217/10919/85007/8424/79723/83852/219/55217/23127/39/3033/93166
hsa04540	Gap junction	77	0.510177361182173	1.73265842157285	5.59401795833103e-05	0.000321901384268873	0.000159091184779867	5278	tags=51%, list=26%, signal=38%	7846/5159/109/114/3710/2697/5598/80310/2770/10376/1902/3708/7082/5330/84617/5894/5592/112/3357/10382/2771/113/3709/4893/196883/10746/2977/5567/7280/2773/1813/115/1956/5578/79861/203068/5156/7277/6654
hsa05221	Acute myeloid leukemia	66	0.510100945775581	1.70539579129074	0.000411281535280639	0.00158706286555352	0.0007843635471606	5792	tags=52%, list=28%, signal=37%	1436/10000/6776/4609/3684/51176/7704/2475/929/5293/5292/861/5467/2209/6688/5914/5290/3551/8503/5894/4790/5291/5295/208/4893/673/5970/6777/1848/6932/6654/6198/8517/6774
hsa05145	Toxoplasmosis	107	0.508995356241223	1.79716249468088	2.96489637406379e-06	2.94692730513007e-05	1.45644032410151e-05	4794	tags=52%, list=23%, signal=40%	10000/3127/3118/4261/3587/7040/3910/3913/3911/7099/3117/3716/7043/3909/3688/240/7297/3717/7042/842/3459/3119/7097/23118/2770/1234/3122/23533/146850/4615/3111/3113/3551/3312/7132/4790/6772/3109/208/3912/3586/3949/5170/10454/2771/5294/3115/51135/3123/5600/2775/1432/5970/959/3310/2773
hsa05162	Measles	122	0.508452869567783	1.82042294900323	5.43165724254361e-07	6.59845768723817e-06	3.26111195068895e-06	5076	tags=52%, list=25%, signal=39%	894/3560/10000/6776/3455/7099/317/355/916/10379/6773/4939/3716/4940/7297/4478/23586/842/4938/3561/5293/898/7097/3553/30835/23118/4599/3665/896/4615/3725/3559/7128/5290/51284/3551/1017/1021/3312/356/8503/29110/4790/5291/6772/5295/64135/440275/208/1027/3569/915/51135/2213/868/5970/6777/3718/3310/103/940/3454/6504
hsa03460	Fanconi anemia pathway	47	0.507572044939078	1.62022652811687	0.00526359998317762	0.0133834170114904	0.00661439736768138	6426	tags=62%, list=31%, signal=42%	6118/197342/9894/672/22909/7156/5429/2177/84464/51455/5395/2175/2176/4292/51426/57599/80198/55120/6117/2189/5888/2178/146956/79728/7398/2072/545/5980/11201
hsa05223	Non-small cell lung cancer	72	0.50286638021196	1.70471608545568	0.000301324134554509	0.00128356254719323	0.000634366599062124	5449	tags=50%, list=27%, signal=37%	10000/6776/83593/5335/11186/842/5293/1029/3800/2064/1870/5290/3798/1021/5336/4233/8503/5894/27436/5291/5295/51426/5979/3082/208/5170/4893/673/6257/6777/3718/6789/1956/5578/6654/238
hsa04625	C-type lectin receptor signaling pathway	98	0.502371711217264	1.75381955707995	1.69905946281147e-05	0.000111458300760432	5.50852962679928e-05	4699	tags=52%, list=23%, signal=40%	4776/10000/1263/1959/3710/10379/6773/4772/834/5293/22808/9020/114548/3553/30835/10892/4046/64581/3725/6850/3659/5290/3551/3708/5336/4775/5530/8503/5894/4790/5291/6772/5295/208/3586/3569/1960/1540/5533/5781/3709/4893/2207/5600/1432/602/868/5970/5532/64170/5743
hsa05206	MicroRNAs in cancer	189	0.501945344230377	1.85707056040771	4.15517270219898e-10	1.5831937243378e-08	7.82451327175934e-09	5278	tags=49%, list=26%, signal=37%	894/407019/7078/407011/407010/5328/407018/5159/7431/23414/406900/442903/4318/4609/7057/3162/2475/406984/3371/407014/5335/5598/4853/11186/672/442898/7042/5293/1029/898/648/6624/406903/7422/4170/5292/3667/406983/960/90427/3690/2064/1870/3678/5290/3551/1021/5336/8434/4233/25/406912/8503/1387/5894/406886/406896/4790/9759/4855/5291/5295/1786/131405/659/9839/4082/6935/1027/6464/10297/406985/4893/406881…
hsa05220	Chronic myeloid leukemia	76	0.500889814753104	1.70109374002244	0.000172416631066894	0.000819603695506393	0.000405067294955021	5278	tags=47%, list=26%, signal=35%	10000/6776/7040/4609/7043/7042/5293/1029/7048/9846/861/1870/5290/3551/1021/25/25759/8503/5894/4790/5291/5295/51426/208/1027/6464/5781/4893/4089/673/3065/5970/6777/613/867/6654
hsa04662	B cell receptor signaling pathway	78	0.50080997761187	1.7069069620419	0.000202897440280463	0.000899329194756649	0.000444469499334159	6518	tags=62%, list=32%, signal=42%	10000/3636/3635/4772/11006/10859/5293/695/5880/8519/118788/10288/10892/3725/6850/25780/7409/5290/3551/5336/4775/971/5530/8503/5894/4790/5291/5295/79168/208/973/5533/4893/7410/11025/2213/5970/5532/6654/974/8517/8915/353514/5534/2932/10990/11024/11027
hsa05212	Pancreatic cancer	76	0.499859759684897	1.69759552509214	0.000184644562709728	0.000853005867166066	0.00042157542857373	4468	tags=43%, list=22%, signal=34%	10000/7040/2475/3716/7043/7042/5338/842/5293/1029/7048/9459/5880/7422/2064/1870/5290/3551/1021/8503/5894/4790/5291/6772/5295/51426/208/4087/5900/4089/673/5970/5888
hsa04066	HIF-1 signaling pathway	102	0.499749689177086	1.75433616595847	1.57586963959982e-05	0.000105486784038519	5.21340331897685e-05	5412	tags=49%, list=26%, signal=36%	5054/10000/1536/5209/3162/7099/2475/405/80201/5335/3459/5293/284/7422/2872/817/3101/2064/5290/2026/5336/8569/7010/230/8453/8503/1387/4790/5291/5295/7428/2027/5211/208/1027/3569/2321/5213/3099/6513/5214/5970/2023/3480/3091/1956/5578/6198/3098/818
hsa04340	Hedgehog signaling pathway	47	0.497386203616852	1.58771218756953	0.008746611922247	0.0206394871258778	0.0102005167438549	6562	tags=55%, list=32%, signal=38%	91653/894/2619/2121/50937/84976/6608/1954/23432/51684/57154/84455/1452/1455/23295/8454/8643/132884/5567/1456/23291/64750/2932/23288/8945/2737
hsa04931	Insulin resistance	98	0.497268620744464	1.73600426280102	2.88099019355491e-05	0.000181723996824233	8.98122449002946e-05	7024	tags=63%, list=34%, signal=42%	10000/948/2475/5792/5834/5836/5293/6195/22877/8473/5565/3667/5564/51085/32/5290/3551/7132/5590/51422/8503/4790/6196/5291/9945/5295/376497/200186/183/5562/5588/208/3569/5170/5781/5501/10062/5728/9882/6513/5970/5770/6197/9586/1375/79660/6198/5465/64764/6774/1385/6720/5507/5580/11000/9021/2932/6945/7376/2673/6517/5563
hsa04660	T cell receptor signaling pathway	97	0.49660832311066	1.73178270837725	3.48164816539934e-05	0.000207632836045633	0.000102616998559138	8036	tags=72%, list=39%, signal=44%	10000/5788/2534/3937/920/916/5335/4772/925/7535/5293/10125/9020/919/10892/3725/7409/5290/3551/3932/4775/5530/8503/5894/4790/5291/5295/29851/5588/208/1493/3586/5170/5533/915/4893/7410/5600/5609/1432/5133/868/5970/5532/959/5063/940/4690/6654/3702/9402/8517/998/8915/1326/387/5534/2932/10298/917/2353/7006/926/1739/6885/3265/8440/3458/2885/5602
hsa04920	Adipocytokine signaling pathway	63	0.494904545010504	1.63791521560357	0.00108095500146882	0.00354553240481773	0.00175228494974945	5792	tags=51%, list=28%, signal=37%	10000/948/7133/2475/3717/126129/5565/3667/5564/10645/32/3551/2180/7132/51422/3953/4790/51703/5562/7186/5588/208/5781/6257/6513/5970/2182/1375/6794/5465/8517/6774
hsa04919	Thyroid hormone signaling pathway	115	0.494535796345034	1.757208909702	3.16400903371658e-06	3.05233812664423e-05	1.50853681483701e-05	5197	tags=50%, list=25%, signal=38%	10000/652/1827/4609/3685/7249/2475/23389/5335/6567/4853/842/5293/7067/6548/5350/3690/477/5290/2099/2648/5336/5330/10025/8503/1387/5894/5333/9968/4855/5291/6772/5295/5469/10231/8202/5211/208/8648/5170/5213/10499/4893/3065/9882/6257/6513/1499/5214/9862/5567/7068/488/3091/8841/5578/489/60
hsa05166	Human T-cell leukemia virus 1 infection	213	0.491258840698052	1.83037696829106	5.17241824701412e-10	1.69655318502063e-08	8.38476221094921e-09	4955	tags=47%, list=24%, signal=36%	4776/894/3560/3383/10000/3127/3118/3689/6776/7040/3600/1959/109/114/3683/4609/1958/920/7094/916/3117/3716/7043/4215/4772/3601/7538/7042/3561/3119/5293/1029/7048/8829/898/29882/3554/9020/29945/896/3122/51433/3111/3725/3559/6688/6722/1870/3113/5290/3551/3932/1017/2648/7132/4775/4801/5530/8503/1387/4790/5291/112/6929/701/2005/5295/8295/200186/3109/51434/208/64682/3569/1030/567/4087/2113/5533/113/311…
hsa05164	Influenza A	148	0.4910213708693	1.78675240179393	5.91254792528138e-07	6.92612756961533e-06	3.42305406200501e-06	3646	tags=45%, list=18%, signal=37%	3627/3383/10000/3127/3118/4261/3455/7099/317/7177/355/10379/6773/3117/4939/3716/6352/4940/7297/3717/23586/8795/91543/842/4938/834/3459/3119/5293/23633/114548/3553/4599/148022/3665/896/3122/4615/3111/64499/3113/5290/51284/3551/1021/356/7132/6347/23430/4928/8797/8503/1387/5894/29110/4790/5291/6772/5295/64135/7098/3109/208/3569/8743/3115
hsa04070	Phosphatidylinositol signaling system	89	0.489830986622194	1.68725477251418	0.000147010317494521	0.000719692300570194	0.00035568874931903	5139	tags=52%, list=25%, signal=39%	3710/3636/3635/5335/3633/5298/8821/5293/1609/8394/5305/8396/3612/8527/4952/5290/3708/5336/9110/5330/1040/3707/8776/8503/8867/23396/5333/9807/5291/5295/8871/3709/5297/79837/200576/5728/64768/22908/9677/51447/23262/55300/5289/56623/5578/3631
hsa04062	Chemokine signaling pathway	179	0.488981742693005	1.80143181313349	5.94490029864389e-08	1.1470160576207e-06	5.66882133740656e-07	6081	tags=53%, list=30%, signal=38%	4283/3627/10000/55970/109/114/6773/6352/6387/5335/2185/7454/59345/3717/2268/6348/6846/5293/5829/1230/2833/57580/5880/2770/1794/1234/729230/10663/3055/23533/146850/6373/7409/6356/5290/3551/6351/5336/5908/25759/6366/6347/5330/2869/5590/1524/8503/5894/4790/2784/5291/112/6772/5295/54331/414062/208/10681/6464/7074/2920/2771/5294/113/2782/4893/388372/196883/56288/7410/9475/673/2785/653361/1236/5970/556…
hsa05323	Rheumatoid arthritis	85	0.488286091459512	1.67531171506812	0.000200897747930254	0.000899329194756649	0.000444469499334159	3822	tags=46%, list=19%, signal=37%	3383/3127/3118/3689/7040/3600/3683/1513/1435/7099/3117/6352/10673/7043/6387/7042/6348/3119/284/942/7097/3553/7422/3122/3111/3725/3113/7010/6347/23545/3109/414062/1493/3569/2321/10312/2920/3115/526
hsa04217	Necroptosis	116	0.485308674944598	1.72651198885924	1.14696464104383e-05	8.00434898430588e-05	3.95593627594065e-05	6392	tags=50%, list=31%, signal=35%	5321/1536/6776/3455/81030/7099/355/10379/6773/3716/5834/7297/3717/6609/8795/7188/834/3459/5836/114548/3553/8681/55072/817/148022/7128/356/7132/192111/824/8797/6772/8605/9525/7098/7186/6778/5481/197259/11124/1540/8743/91782/8837/6777/3718/54822/51510/3454/8737/818/124044/2752/6774/10616/5119/142/3460
hsa05152	Tuberculosis	159	0.485269684926532	1.76836139004287	3.28364315665428e-07	4.66596013612505e-06	2.30602651143536e-06	4707	tags=47%, list=23%, signal=36%	9902/2214/10000/3127/3118/4261/3689/3587/7040/1263/2212/3684/7099/317/929/3117/3716/7043/3687/1520/3717/4360/7042/842/8877/3459/3119/11151/972/7096/7097/3553/30835/5993/817/10892/3122/4046/64581/2209/4615/3111/6850/3113/9103/7132/4801/5530/1387/5894/23545/4790/6772/3109/208/3586/3569/1054/718/10312/5533/3115/4802/51135/2207/3123/5600/1432/2213/5970/5532/64170/10333/5289
hsa05169	Epstein-Barr virus infection	184	0.483792339703809	1.78683714600512	2.15666151236357e-08	5.4414228927327e-07	2.68927832310923e-07	4270	tags=41%, list=21%, signal=33%	894/3627/3383/10000/3127/7431/3118/3683/4609/3455/317/355/916/10379/6773/3117/4939/3716/4940/7297/23586/8819/9612/842/4938/7188/3119/5293/898/7097/9020/695/23118/919/3665/896/3122/960/4615/3111/3725/6850/7128/1870/3113/5290/3551/1017/1021/953/5336/8503/29110/4790/5291/6772/5295/51426/7186/3109/208/1027/3569/5709/10454/6890/567/3115/915/51135/3123/5600/3065/5609/1432
hsa05231	Choline metabolism in cancer	89	0.48067702126207	1.6557233419532	0.000295472550482279	0.00127519732313405	0.000630232309892949	5372	tags=48%, list=26%, signal=36%	5321/10000/5159/10163/7249/2475/5335/7454/5338/7248/80310/5293/1609/5880/8681/8394/3725/8527/5290/56261/5130/8503/23396/5894/5291/8605/5295/56994/208/5170/6667/5900/4893/6581/3091/8936/1956/5578/57153/5156/6654/6198/1120
hsa05211	Renal cell carcinoma	65	0.480602435530268	1.59836654486183	0.0024215439728975	0.00696724932552964	0.00344337739451722	4945	tags=48%, list=24%, signal=36%	10000/7040/7043/405/7042/5293/7422/3725/5290/4233/5908/2549/8453/8503/1387/5894/5291/5295/7428/2034/3082/201163/208/2113/5781/2889/4893/673/6513/3091/5063
hsa04926	Relaxin signaling pathway	121	0.478294349450475	1.7103672667986	2.13127775428732e-05	0.000137070412432596	6.77434002394731e-05	5040	tags=47%, list=25%, signal=36%	10000/1281/7040/55970/109/114/4318/4313/59/1282/1284/59345/5293/7048/1277/7422/2770/3725/7424/5290/25759/5330/5590/1288/8503/5894/4790/2784/5291/112/5295/54331/1285/208/10681/1287/6464/4087/2771/113/2782/4893/196883/1286/2785/5600/2775/5609/1432/5970/5567/2773/6416/9586/115/1956/5578
hsa05167	Kaposi sarcoma-associated herpesvirus infection	177	0.476124843609166	1.75201064532497	2.23298415360622e-07	3.32917637446746e-06	1.64535674476248e-06	6614	tags=59%, list=32%, signal=40%	4776/3383/10000/1827/55970/3710/4609/3455/51176/2475/355/10379/6773/3716/5335/4772/7297/643246/59345/3717/7538/842/3572/3459/131450/5293/942/1230/57580/7422/1234/148022/3055/3665/23533/146850/3725/6850/1870/9976/5290/3551/1021/3708/5336/7132/4775/5530/8503/1387/5894/29110/4790/2784/5291/6772/5295/54331/7098/7186/7316/208/10681/3569/718/2920/5533/5294/2782/3709/4893/2785/5600/5609/1432/1499/5970/5…
hsa04370	VEGF signaling pathway	56	0.473611765730213	1.54237432162872	0.00342083648550491	0.00940812935778651	0.00464971733343749	5040	tags=50%, list=25%, signal=38%	5321/10000/5335/842/8877/5293/5829/5880/7422/8681/3791/5290/5336/25759/5530/8503/5894/5291/8605/5295/208/5533/4893/5600/1432/5532/5743/5578
hsa04145	Phagosome	142	0.47095615040206	1.70935910815748	3.95519020843185e-06	3.5062226712585e-05	1.73285716101993e-05	5734	tags=54%, list=28%, signal=39%	7846/9902/2214/7058/3127/3118/3689/1536/948/7057/2212/3685/3684/23673/7099/3693/929/3117/3688/4481/1520/4360/9341/3119/4689/11151/7097/30835/81035/3122/64581/2209/1783/10376/3111/4973/3690/3113/3678/9103/4688/715/3673/84617/7059/23545/3109/1778/718/10312/10382/6890/4074/3115/949/526/1311/8417/200576/3123/653361/2213/9146/55176/7280/10333/5289/79861/203068/3133/60/523/7277/1780/5869/5868/534
hsa05146	Amoebiasis	90	0.469382947983307	1.6192645014012	0.000504981496306487	0.0019038382849256	0.000940921360329086	6654	tags=61%, list=32%, signal=41%	2335/1281/3689/7040/3910/3913/3684/3911/7099/929/1282/7043/3909/1284/7042/5293/3554/1277/7097/3553/5290/5330/1288/8503/4790/5291/5295/81/1285/3912/3586/1287/3569/2920/5052/1286/87/5970/5567/913/911/5578/2774/3915/5869/5868/912/1278/3918/338382/2767/2769/5878/5269/7414
hsa04210	Apoptosis	132	0.468309689869746	1.68846749379509	9.08592232322494e-06	6.81212000644034e-05	3.36670886069259e-05	5277	tags=46%, list=26%, signal=35%	7846/10000/3710/1513/5551/1519/317/1439/355/1521/55367/1520/8795/842/3002/5293/143/9020/6709/4170/7185/10376/3725/10039/5290/3551/3708/356/7132/824/8797/8503/5894/4790/5291/5783/1677/5295/7186/1522/208/5170/8743/3709/4893/835/56616/8837/84823/1676/5970/8739/4803/27429/5366/79861/8737/3563/1509/60/7277
hsa05161	Hepatitis B	148	0.466945622958116	1.69914440149623	7.64723322154248e-06	6.11778657723399e-05	3.02355305806814e-05	6466	tags=52%, list=31%, signal=36%	3339/4776/10000/6776/7040/1959/4318/4609/7099/317/355/6773/3716/7043/4772/7297/2185/3717/23586/7042/842/5293/7048/898/7097/23118/148022/3665/4615/3725/1870/5290/3551/1017/356/4775/8503/1387/5894/29110/4790/5291/6772/5295/64135/7098/6778/208/3569/1960/10454/4893/4089/51135/673/5600/5609/1432/5970/6777/3718/6416/9586/5578/3454/6654/7187/64764/8517/1642/6774/1385/3661/10971/843/7189/5925
hsa05163	Human cytomegalovirus infection	203	0.464050814495017	1.72365878790362	1.66338322171762e-07	2.59804617487323e-06	1.28401511851886e-06	6687	tags=57%, list=33%, signal=39%	4776/10000/3587/55970/109/114/3710/4609/3685/7249/5734/2475/355/3716/6352/6387/4772/2185/59345/7248/842/7188/6348/5293/1029/5829/1230/3554/3553/5880/7422/2770/1234/9138/2768/3690/1870/5290/3551/1021/3708/6351/356/7132/6347/4775/5330/5530/8503/5894/29110/4790/2784/5291/112/5295/54331/7186/414062/208/10681/3569/9826/6890/567/2771/5533/6667/113/2782/3709/4893/388372/196883/9475/2785/5600/2775/1432/1…
hsa04621	NOD-like receptor signaling pathway	156	0.463760868963342	1.69052043766351	6.55144395565581e-06	5.37218404363776e-05	2.65505886623946e-05	4647	tags=44%, list=23%, signal=34%	2633/115361/1536/2634/2635/84168/3710/5027/3455/7099/10379/115362/6773/4939/3716/6352/4940/7158/7297/643246/9927/3428/51393/4938/7188/834/114548/3553/22861/23710/23118/55072/5585/148022/3665/4615/3725/7128/3551/10392/5586/3708/58484/10010/6347/5330/29110/10135/4790/6772/7186/3569/9447/84674/10628/10454/2920/3709/7205/6041/118429/51135/5600/55669/1432/22900/5970/64170/54822
hsa04725	Cholinergic synapse	98	0.463304721156127	1.61743359092064	0.000421913069894484	0.00160915682471385	0.000795282897965123	6181	tags=50%, list=30%, signal=35%	10000/55970/109/114/3710/2534/59345/3717/5293/2770/3784/817/56479/23533/146850/5290/3708/5330/8503/2784/5291/112/5295/54331/208/10681/2771/5294/113/2782/3709/4893/196883/2785/9132/2775/3786/5567/2773/9586/115/5578/818/2788/3770/64764/775/1385/2767
hsa01522	Endocrine resistance	93	0.462679332315935	1.6053442556706	0.000656249636625126	0.00232203791974487	0.00114760539037455	5305	tags=46%, list=26%, signal=34%	10000/109/114/4318/4313/2475/1839/4853/5293/1029/54567/3725/2064/1870/5290/2099/25759/8503/5894/4855/5291/112/5295/5469/8202/208/10498/1027/6464/6667/113/4893/196883/673/5600/1564/1432/5567/3480/115/1956/6654/6198
hsa05100	Bacterial invasion of epithelial cells	67	0.462233273532384	1.54925971195241	0.00405891720865617	0.0108237792230831	0.00534936457110013	6016	tags=51%, list=29%, signal=36%	2335/10163/857/3688/5293/5829/3611/3678/5290/1793/4233/25759/2549/8503/5291/5295/1785/1759/6464/26052/1499/3059/10095/63916/8936/867/60/1213/9564/858/998/10096/79658/387
hsa04072	Phospholipase D signaling pathway	133	0.460403608079646	1.66062970151214	3.08917837612277e-05	0.000191179341012881	9.44852969062375e-05	4065	tags=42%, list=20%, signal=34%	5321/10000/5159/109/114/56895/2534/27128/7249/10411/2475/5335/2185/5338/7248/8877/80310/5293/1609/22808/9846/8681/8394/23533/146850/2768/6850/9265/8527/5290/1902/5336/25759/2549/5330/8503/23396/5894/5291/112/8605/5295/1785/183/4254/208/1759/6464/26052/5294/113/5781/5900/4893/196883/2207
hsa05202	Transcriptional misregulation in cancer	156	0.459305021223792	1.67427779587343	1.14593815733145e-05	8.00434898430588e-05	3.95593627594065e-05	4838	tags=42%, list=24%, signal=32%	894/3560/5328/1436/4299/604/5218/4318/4609/3684/7704/7709/929/64332/2313/4298/3002/26471/4094/942/7048/648/51513/860/84444/7185/8013/3695/861/2209/6688/5327/5914/8861/4233/2078/4300/4086/4286/4790/5090/6929/221037/2005/51426/6935/4066/55589/1027/3569/2321/7849/6667/3486/4804/3065/7490/51804/6257/5970/3480/4211/1848/1655/2119
hsa04142	Lysosome	129	0.457916421636255	1.64504464543219	8.19857881146166e-05	0.000436259593870052	0.000215609683748357	7750	tags=62%, list=38%, signal=39%	7805/1513/1519/3482/3425/5538/79158/1521/1520/6609/2799/4126/2548/23062/8906/8372/20/5641/8907/23659/950/57192/10717/410/23545/23163/4864/26088/1522/162/23335/1200/8943/3423/2629/10312/2517/4074/6448/2588/4125/1497/3988/5660/164/6556/9179/23431/9583/427/1509/23312/27074/8692/1213/51172/411/53/3074/5476/2581/256471/1657/23457/4669/26985/9741/535/84572/4891/3920/8722/54/3373/533/2990/1777/138050/13…
hsa04610	Complement and coagulation cascades	68	0.45669137936918	1.53330478881547	0.00619626547376481	0.0156336544261143	0.00772651727092939	2634	tags=35%, list=13%, signal=31%	5054/5328/11326/5627/3689/2162/714/719/713/728/3684/2/3687/712/720/721/1191/710/5327/715/10544/7450/10747/7056
hsa05213	Endometrial cancer	57	0.455969328562463	1.49403362008768	0.00844830412107176	0.0202265967278214	0.00999645666265886	5278	tags=46%, list=26%, signal=34%	10000/4609/51176/842/5293/3611/2064/5290/8503/5894/5291/5295/4292/51426/8312/208/5170/10297/4893/324/673/5728/1499/6932/1956/6654
hsa04921	Oxytocin signaling pathway	136	0.455307189874226	1.64520849938854	3.3269770900995e-05	0.000202083052880118	9.98741660575679e-05	5040	tags=46%, list=25%, signal=35%	5997/4776/4881/5321/3762/57118/4882/1827/109/114/3710/781/5598/4772/2770/4638/8681/5565/817/5021/23533/146850/5564/3725/10645/782/3708/4660/952/54776/8536/4775/5330/4659/5530/51422/5894/112/8605/6262/5562/1938/2771/5533/5294/113/29904/3709/5501/4893/196883/9475/2775/85366/5532/2977/5567/5743/2773/10398/115/1956/5578
hsa04068	FoxO signaling pathway	123	0.454343450518564	1.62683912853959	8.97022399848127e-05	0.000452651303307978	0.00022371084951678	5607	tags=46%, list=27%, signal=33%	894/10000/7040/604/1263/7043/114907/10769/80854/7042/5293/7048/5934/23710/5565/3667/1901/5564/3575/5290/3551/1017/356/51422/8503/1387/5894/5291/5295/10365/116986/5562/9456/208/3586/1027/3569/1030/5170/8743/4303/8698/4893/4089/673/5728/5600/1432/3480/6789/1956/901/6446/6654/26260/6794
hsa05210	Colorectal cancer	85	0.453543536598811	1.55610985741219	0.00240411966659366	0.00696724932552964	0.00344337739451722	5305	tags=45%, list=26%, signal=33%	10000/7040/4609/51176/2475/7043/7042/842/5293/7048/5880/3725/5290/8503/5894/5291/26060/5295/4292/51426/8312/208/4437/10297/4087/5900/4893/4089/4436/324/673/2956/1499/6932/5366/1956/6654/6198
hsa04670	Leukocyte transendothelial migration	103	0.452852505214879	1.59217412937268	0.00115166847342356	0.00370340450277379	0.00183030902897036	4354	tags=49%, list=21%, signal=38%	3383/3689/1536/4318/5175/3683/58494/83593/3684/4313/7070/10411/3676/7412/6387/3688/5335/2185/4478/4689/5293/5829/5880/2770/1003/24146/7409/5290/5336/4688/5908/6494/58498/8503/9076/90952/5291/5295/81/83692/2771/5781/2909/7410/9475/87/5600/653361/1432/1499
hsa04520	Adherens junction	65	0.452568264640173	1.50513172632783	0.0110972834259975	0.0258149571895546	0.0127583549653126	6754	tags=58%, list=33%, signal=39%	10163/2534/51176/5792/7454/5795/7048/5880/2064/6591/4233/7082/1387/6615/81/10580/2241/9855/4089/56288/87/1499/3480/5770/6932/8936/1956/60/117178/5787/8826/998/1500/387/51701/7414/2260/7525
hsa05131	Shigellosis	215	0.451613516315468	1.68323871637455	3.46204096446286e-07	4.66596013612505e-06	2.30602651143536e-06	6487	tags=53%, list=32%, signal=36%	10000/10163/3710/27128/7099/7094/2475/929/1729/6352/3688/80201/5335/54874/643246/7188/834/831/5293/5829/3554/114548/3553/23118/11146/55072/10892/3101/3611/960/4615/3725/9265/3678/5290/3551/10392/3708/1793/5336/58484/7132/55062/5330/58498/824/8503/23048/29110/5333/4790/10670/5291/5295/81/7186/9181/7316/5588/208/25851/5481/718/10454/8454/10318/3709/4303/92610/9475/3099/87/5600/1432/3059/5970/7323/1…
hsa04810	Regulation of actin cytoskeleton	199	0.451601283338496	1.6765062121492	1.94583401324633e-06	2.12744518781598e-05	1.05143311592959e-05	6781	tags=56%, list=33%, signal=38%	2335/3679/5159/3689/22801/10163/55970/3683/3685/3684/3071/3693/3676/3696/1729/3687/6387/3688/4478/80310/5293/5829/22808/2246/9459/5880/6548/4638/2252/54434/9138/8394/4627/5305/3695/2768/3690/23191/8396/7409/3678/5290/1902/128239/4660/1793/3675/54776/3673/4659/58498/8503/23396/5894/3984/5291/28964/5295/8822/81/3672/10152/7074/10297/2909/5501/4893/79837/7410/9475/200576/324/673/87/2248/9965/85366/2…
hsa04140	Autophagy - animal	136	0.451181323464537	1.63030008011574	5.58349008470867e-05	0.000321901384268873	0.000159091184779867	8069	tags=63%, list=39%, signal=39%	10000/8408/7249/2475/643246/140775/7248/5293/22808/23710/84938/89849/3667/10645/51100/5290/55626/3708/9110/10010/53349/55062/10533/8503/5894/29110/10670/5291/5295/440275/1613/5562/23130/5588/208/5170/203228/23192/4893/8837/5728/9776/5567/3480/5289/22863/3091/64121/55054/1509/116442/6198/64223/8678/55102/6794/79065/338382/5580/9140/81631/115201/55255/7189/22800/55578/9706/3920/5563/4218/2081/26100…
hsa04151	PI3K-Akt signaling pathway	311	0.450906856076862	1.70873367817837	4.34412912165859e-10	1.5831937243378e-08	7.82451327175934e-09	5305	tags=48%, list=26%, signal=36%	2335/894/3560/3679/1436/7058/10000/5159/1969/22801/55970/4609/3910/7057/3455/1435/3685/3913/7249/3911/5526/5008/7099/3693/2475/3676/3696/3371/3716/1282/3909/3688/1284/59345/3717/3164/672/7248/842/80310/1299/3561/9180/5293/284/898/5934/2246/1277/7097/7422/118788/4170/2252/3791/3574/5585/896/6696/3667/23533/3695/146850/5523/2057/3690/3559/6850/2064/3575/7424/1298/3678/5290/5528/1902/3551/1017/5586/…
hsa04064	NF-kappa B signaling pathway	102	0.44847875218216	1.57435314449649	0.00101939384186357	0.0034118487768495	0.00168621537751869	4759	tags=45%, list=23%, signal=35%	5328/3383/7099/929/7412/10673/6387/5335/55367/23586/7188/7535/3554/9020/695/3553/23118/7185/10892/148022/4615/6850/7128/3551/3932/6351/5336/128178/6366/7132/4790/7186/8740/5588/10454/2920/1540/4049/388372/8837/51135/5970/959/5743/23085/7706
hsa05205	Proteoglycans in cancer	191	0.448312520040233	1.65859001510542	5.46667750234261e-06	4.71860584412731e-05	2.33204525030682e-05	5792	tags=53%, list=28%, signal=38%	3339/2335/7078/2316/2318/5328/10855/10000/4060/7040/4318/3710/4609/857/7057/2317/3685/4313/7099/3693/2475/355/1839/3688/5335/4478/7042/5293/5829/22808/1277/7097/406903/7422/6548/9138/3791/817/960/8324/3690/2064/7409/3678/7291/5290/2099/3708/4660/5336/6608/4233/356/2549/54776/3673/4659/8503/5894/5291/3316/5295/3082/288/208/5170/7074/4087/5781/3709/5501/5329/4893/7410/9475/29102/673/5600/1432/1499/…
hsa04974	Protein digestion and absorption	84	0.447622355006728	1.53465923197455	0.00175349681882372	0.00547759006261125	0.00270715298344715	4372	tags=39%, list=21%, signal=31%	1296/1290/1295/1301/1281/1307/6550/50509/1289/6505/1282/1284/9056/1299/1277/1300/3784/1298/206358/477/2006/5222/1359/1288/1303/11136/1285/1306/1287/1286/1360/1293/1305
hsa04211	Longevity regulating pathway	81	0.447295519988014	1.52459724831562	0.00261402186982774	0.00739137218365085	0.00365298881990446	7631	tags=58%, list=37%, signal=37%	10000/109/114/8408/83667/7249/2475/7248/5293/5565/3667/5564/10645/5290/79813/51422/8503/4790/5291/112/26060/5295/5562/208/113/4893/196883/9776/5970/5567/3480/9586/115/6198/6794/64764/6648/1385/10919/847/143686/5563/6009/23411/3265/1386/57521
hsa04936	Alcoholic liver disease	120	0.446968954615846	1.59799464551501	0.000165634196304428	0.000798941417468417	0.000394855514409936	7440	tags=62%, list=36%, signal=40%	10000/714/719/713/728/51176/7099/64900/929/355/712/720/721/224/9020/3553/23118/126129/8310/5565/148022/5564/4615/23175/10645/32/3551/356/7132/9663/84818/51422/29110/4790/5562/34/208/3569/718/10454/2920/51135/79966/5600/5609/1432/128/1499/5970/125/6416/6932/1375/8737/727/31/4217/7187/5465/8517/6720/217/3661/23765/2932/7189/37/1571/6934/5563/219/114609/6885/836/23411
hsa01521	EGFR tyrosine kinase inhibitor resistance	78	0.446569782608551	1.52204050447818	0.00490133090763916	0.0126585554150051	0.00625615383154936	6474	tags=53%, list=32%, signal=36%	10000/5159/2475/3716/5335/3717/558/80310/5293/7422/3791/2064/5290/4763/5336/4233/25759/2549/8503/5894/5291/5295/3082/208/3569/6464/4893/673/5728/3480/1956/5578/5156/6654/6198/6774/5155/2621/2247/2932/10018
hsa04750	Inflammatory mediator regulation of TRP channels	87	0.444824964499117	1.52959096192225	0.00323859093484784	0.00900218497144145	0.00444909013351086	5040	tags=43%, list=25%, signal=32%	5321/109/114/3710/5734/5335/51393/5293/3554/3553/3269/1573/8681/817/8398/5290/3708/5336/5330/8503/5291/112/8605/5295/5588/3357/113/3709/5501/196883/239/5600/1432/5567/4803/115/5578
hsa04371	Apelin signaling pathway	129	0.442270896619748	1.58883878353841	0.00037816657633855	0.0015126663053542	0.000747595028961961	4955	tags=43%, list=24%, signal=33%	5054/10000/55970/109/114/3710/1958/2475/59/643246/59345/8877/22808/187/6548/2770/4638/5565/6696/23533/146850/5564/5327/3708/5330/51422/5894/9759/2784/112/54331/10365/6262/5562/4209/208/10681/4087/2771/5294/113/2782/3709/8862/4893/4089/196883/2785/85366/5567/10014/5289/2773/185/115
hsa04668	TNF signaling pathway	109	0.441513317774591	1.56131156073997	0.000881539546740158	0.00304363127716602	0.00150423368640426	6304	tags=53%, list=31%, signal=37%	3627/3383/10000/4323/3600/7133/4318/1435/355/7412/6352/7188/5293/9020/3553/23118/7185/3725/7128/7424/3659/5290/3551/7132/6347/192111/3976/8503/4790/5291/5295/7186/8809/208/197259/3569/10454/2920/4049/8837/5600/5609/1432/602/5970/5743/6416/9586/8737/4217/7187/3726/64764/8517/1326/1385/9021/843
hsa04015	Rap1 signaling pathway	196	0.437350415972005	1.62129603210038	1.43898366207179e-05	9.83305502415725e-05	4.8597255254179e-05	5040	tags=45%, list=25%, signal=35%	1436/10000/5159/3689/1969/2357/109/114/3683/7057/1435/83593/3684/3937/7094/10411/54518/3688/5335/80310/5293/284/22808/2246/23683/9693/5880/7422/2770/2252/23094/3791/9732/3690/5587/25780/7424/7409/5909/5290/1902/4233/7010/5908/6494/5330/5590/8503/5894/9223/5291/112/9771/5295/8822/889/3082/5028/4254/25865/208/2321/7074/2324/2771/113/5900/2889/9855/4893/26037/196883/56288/7410/673/2248/4804/5600/277…
hsa04060	Cytokine-cytokine receptor interaction	236	0.43558195988466	1.63478824395534	1.61617774321373e-06	1.82795275784174e-05	9.03416959908946e-06	3563	tags=36%, list=17%, signal=30%	3560/4283/1436/3627/652/3587/7040/58985/4982/3590/3600/146433/7133/163702/3455/1435/5008/920/1439/355/6352/10673/7043/6387/7292/3624/3601/943/8795/7042/3572/6348/3459/3561/9180/6846/8808/7048/1230/3554/8718/2833/3553/55504/1234/3574/729230/10663/939/2057/3603/3559/6373/3575/23529/6356/50615/6351/1438/3566/356/6366/7132/6347/84818/1524/3976/8797/654/3953/7293/353500/94/3598/659/414062/8740/8809/35…
hsa04935	Growth hormone synthesis, secretion and action	104	0.435406989140646	1.53294485073371	0.00192184732530395	0.00582689029944683	0.00287978532129272	6409	tags=49%, list=31%, signal=34%	10000/6776/109/114/3710/2475/5335/3717/5293/2770/3667/5290/3708/5336/25759/5330/8503/1387/5894/5291/112/6772/5295/208/6464/2771/113/3709/4893/3486/196883/5600/1432/5567/6777/2773/2690/6416/9586/115/5578/6654/9564/3726/64764/6774/775/1385/2767/9021/2932
hsa05203	Viral carcinogenesis	161	0.432971860885391	1.58001618019306	8.51238231941565e-05	0.000436259593870052	0.000215609683748357	7932	tags=61%, list=39%, signal=38%	894/6776/1959/23352/10379/3716/7188/3572/5293/1029/5829/898/5934/1234/7185/3665/896/51564/3725/6850/6722/5290/1017/2648/1021/9734/8503/1387/4790/9759/5291/5295/81/7186/1027/1030/1960/718/2967/4893/87/3065/2934/5970/5567/10014/6777/3718/2968/5922/3516/23513/5933/7532/9586/5366/2960/8841/3133/9519/1108/1111/7187/1233/2959/64764/728340/8517/1642/998/6774/8850/10013/1385/387/3661/6908/10971/6672/8393…
hsa04360	Axon guidance	172	0.432304960710084	1.58906719442413	8.37938091902415e-05	0.000436259593870052	0.000215609683748357	4280	tags=38%, list=21%, signal=31%	91653/4776/1808/6586/1969/2051/2048/9353/23380/23654/55558/2534/1949/7869/6091/6387/5921/3688/54437/5335/5364/5293/223117/8829/57689/54910/5880/2770/10505/54434/10154/817/3611/2050/285220/57522/5290/5336/6608/4233/25/4775/5590/5530/8503/5894/10500/219699/7220/3984/5291/5295/659/5170/10501/2771/5533/5781/2042/4893/56288/9475/4917/5361/8633/22854
hsa04012	ErbB signaling pathway	82	0.43125626174171	1.47339368177135	0.0100651270616706	0.0235811548301997	0.0116543576503554	5412	tags=44%, list=26%, signal=32%	10000/6776/4609/2475/1839/5335/5293/817/3725/2064/5290/5336/25/25759/2549/8503/5894/5291/5295/208/1027/6464/4893/673/5609/868/6777/6416/5063/1956/5578/4690/867/6654/6198/818
hsa04912	GnRH signaling pathway	84	0.430670588703124	1.47654063185301	0.00400217965627711	0.0107599584201548	0.00531782283922928	6404	tags=51%, list=31%, signal=35%	5321/4323/109/114/3710/1958/4313/1839/4215/5598/2185/5338/8681/817/3725/3708/5330/5894/112/8605/4216/113/3709/4893/196883/10746/5600/5609/1432/5567/6416/115/1956/5578/6654/818/2796/998/775/5580/2767/163688/5337
hsa01524	Platinum drug resistance	71	0.429782785412355	1.45128354412173	0.0170849435683589	0.0383826129480941	0.018969584062922	4233	tags=35%, list=21%, signal=28%	10000/4257/317/355/672/842/5293/1029/2946/5429/2064/7155/5290/356/8503/653689/5291/5295/4292/208/5170/4437/4436/2956/538
hsa04914	Progesterone-mediated oocyte maturation	91	0.428690160381478	1.4816531635303	0.00350171992693101	0.00949226558705265	0.00469129942363963	5036	tags=41%, list=25%, signal=31%	10000/109/114/132864/5293/6195/29882/29945/2770/51433/6793/5290/1017/8503/5894/6196/5291/112/51343/5295/51434/208/64682/2771/113/196883/8697/673/5600/441273/1432/5567/3480/2773/6197/115/729597
hsa05170	Human immunodeficiency virus 1 infection	189	0.425317674061336	1.57356760133206	7.30183093396855e-05	0.000399166757723614	0.000197277537514238	8727	tags=65%, list=42%, signal=37%	4776/10000/55970/7133/3710/7099/920/2475/355/916/5335/4772/2185/59345/842/7188/5293/5829/7097/5880/23118/2770/1234/8906/919/4615/3725/8907/5290/3551/3708/5336/356/8450/7132/4775/5530/8503/684/5894/29110/4790/3984/2784/5291/5295/54331/7186/162/208/10681/85363/10454/6890/567/2771/5533/8454/2782/3709/915/4893/51135/2785/5600/2775/60489/5609/7465/1432/5970/5532/2773/164/5063/5578/8737/3133/6198/1111/…
hsa04514	Cell adhesion molecules	132	0.42483830389514	1.53173355530076	0.000542350540145347	0.00202148837690539	0.000999066784478271	4280	tags=42%, list=21%, signal=33%	1000/3383/3127/57555/3118/3689/1462/6614/5175/3683/5788/58494/3685/3684/914/920/3676/3696/7412/3117/80380/3688/5792/9672/925/947/3119/942/57689/6404/1003/3122/3695/8506/24146/29126/3111/3113/2734/6693/9076/90952/22871/29851/3109/83692/57863/1493/201633/3115/3385/3123/54413/5133/22854
hsa05168	Herpes simplex virus 1 infection	462	0.42375686051729	1.63075062662365	2.38255772134085e-10	1.30246488766633e-08	6.43708577344721e-09	8218	tags=58%, list=40%, signal=35%	91975/10000/3127/3118/80818/3455/7249/155054/317/2475/355/10379/6773/3117/7699/4939/3716/6352/4940/100131017/3054/7297/3717/55900/219749/23586/148156/7248/842/4938/7188/3459/3119/972/5293/90594/7097/3553/7637/147741/23118/7556/29915/148022/3665/3122/147923/163223/4615/3111/3690/6850/3113/90592/54753/3678/5290/100289678/3551/1967/8427/10795/100289635/356/84449/7132/6347/7574/7728/284371/65243/1482…
hsa04910	Insulin signaling pathway	126	0.422324942463618	1.51384487075461	0.0010766387131446	0.00354553240481773	0.00175228494974945	6409	tags=48%, list=31%, signal=33%	10000/7249/2475/3636/5792/80201/5834/7248/5836/5293/23265/2872/5565/3101/3667/5564/32/5290/3551/5256/8569/2319/25759/5590/51422/8503/5894/5291/5295/5562/10580/208/23433/5170/6464/5501/2889/4893/9322/3099/673/5575/868/5567/5770/2645/79660/867/5260/6654/6198/3098/31/6720/5507/89801/9021/163688/5257/2932
hsa04928	Parathyroid hormone synthesis, secretion and action	97	0.421540987044949	1.47000635765432	0.00666297601026697	0.0165564858436937	0.00818260211787171	7179	tags=54%, list=35%, signal=35%	10893/4323/109/114/5142/3710/1958/1839/5338/10568/5745/2770/9138/860/2768/3708/5144/632/5330/4041/5894/112/4209/9826/2771/6667/113/4929/3709/196883/673/6257/5567/2773/9586/115/1956/64386/5578/142680/64764/1385/387/2767/5337/11214/2260/5141/4208/4325/2353/596
hsa04120	Ubiquitin mediated proteolysis	136	0.421195639888796	1.52194971232908	0.000684534346332443	0.00238858793188342	0.00118049596120041	6991	tags=54%, list=34%, signal=36%	7318/26259/672/9820/29882/89910/29945/10277/10054/7325/51433/8924/9817/8450/55958/8453/57154/23221/51343/7428/51434/7316/7327/23295/64682/57448/8454/11059/55236/8697/55120/10273/11060/9039/868/54926/7323/84447/9063/9690/9320/867/8916/10075/51366/51588/65264/1642/996/63893/23291/22888/1161/7328/64750/25898/23327/9021/10401/118424/55294/8925/9354/7189/10477/8945/9246/23759/997/26091/4281/22954/5528…
hsa05132	Salmonella infection	244	0.419396503331334	1.57630327047702	1.12747389699177e-05	8.00434898430588e-05	3.95593627594065e-05	8347	tags=59%, list=41%, signal=36%	7846/2316/2318/10000/23207/5420/4609/5788/2317/27128/51176/3071/7099/929/23339/8795/834/5293/79443/23265/7097/114548/3553/23118/79026/5585/64601/3800/29109/1783/4615/10376/3725/23191/9265/5290/3798/3551/10392/57617/58484/7132/27072/60412/58498/8797/84617/55207/5894/4790/5291/65082/1785/1639/9842/55823/7186/1778/208/197259/3569/10454/10382/8743/5294/4074/89953/9475/51135/84516/5600/51164/5609/1432…
hsa04724	Glutamatergic synapse	98	0.416189452270613	1.45295044395308	0.00759310002299541	0.0185860955786753	0.0091856826672529	6404	tags=47%, list=31%, signal=32%	5321/1742/55970/109/114/3710/6505/6507/59345/5338/2770/8681/85358/3708/5330/5530/7220/2784/112/8605/54331/9456/10681/2901/2771/5533/113/2782/3709/196883/81539/2785/2775/5532/5567/2773/115/5578/2744/2788/54407/2752/775/50944/5534/5337
hsa05215	Prostate cancer	93	0.41362339492626	1.43513637778493	0.00864651755613489	0.0205511431769003	0.0101568551002652	6009	tags=46%, list=29%, signal=33%	5328/10000/5159/4318/51176/2475/842/80310/5293/898/2064/5327/1870/5290/3551/1017/2078/8503/1387/5894/4790/5291/5295/208/6935/1027/5170/4893/673/5728/1499/5970/3480/2119/6932/9586/1956/5156/6654/64764/8517/5155/1385
hsa04071	Sphingolipid signaling pathway	115	0.41339351768942	1.46889017512108	0.00344199854553165	0.00940812935778651	0.00464971733343749	4398	tags=39%, list=21%, signal=31%	10000/2534/5526/6609/134/5338/8877/140/340485/5293/9846/5880/2770/10558/1901/5523/2768/5290/5528/7132/5330/5590/253782/8503/5894/4790/5291/5295/8560/7186/208/55304/5170/2771/8698/4893/4363/29956/9475/2207/5728/5600/91012/1432/5970
hsa05417	Lipid and atherosclerosis	189	0.408560279291477	1.51156948768494	0.000346060271475995	0.00140133048202625	0.000692570263902576	6463	tags=51%, list=31%, signal=35%	3383/10000/1536/948/4318/7099/317/929/355/7412/6352/5335/142678/4772/3717/8795/842/6348/834/4689/5293/7097/114548/3553/23118/1573/9138/177/817/148022/3665/4615/3725/4973/7409/5290/3551/3708/3312/4688/5908/356/10010/7132/6347/4775/5330/5530/8797/8503/29110/4790/5291/5295/7186/414062/208/3569/3949/5170/10454/2920/8743/5533/4893/7410/9475/51135/5600/5609/653361/6257/1432/5970/5532/959/3310/10333/641…
hsa05200	Pathways in cancer	485	0.403792439736535	1.55794284897407	6.9101876920701e-09	1.88878463583249e-07	9.33481495244557e-08	5536	tags=45%, list=27%, signal=34%	2335/894/3560/1909/1436/10000/5159/652/6776/7040/3600/55970/109/114/4318/4609/3910/3162/3455/83593/3685/3913/4257/51176/4313/3911/5734/7704/317/7709/2475/1439/355/6773/3716/1282/7043/6387/3909/405/3688/5335/1284/59345/1855/3717/3601/4853/11186/7042/5338/842/7188/3572/3459/3561/5293/1029/7048/898/2246/54567/10125/5880/7422/2770/2252/9138/7185/5292/3574/817/896/2946/861/5467/8324/2768/2057/3725/355…
hsa04218	Cellular senescence	152	0.40074065009661	1.46119092813346	0.00423716369532734	0.0110300769211696	0.00545132171328664	6683	tags=50%, list=33%, signal=34%	4776/894/5054/10000/7040/3710/4609/83593/7249/2475/7043/4772/7042/7248/5293/1029/7048/22808/898/5934/896/1870/5290/1017/5928/28996/1021/3708/4775/5530/824/8503/5894/4790/5291/5295/208/5481/3569/1030/4087/2113/5533/3709/5501/4893/3486/5883/5728/5600/678/1432/5970/5532/3805/204851/54822/5933/91750/3133/1111/55957/23291/545/10114/11200/163688/5534/144715/472/677/5925/8945/3134/10111/22800
hsa04722	Neurotrophin signaling pathway	115	0.393630090859217	1.39866579506823	0.0128168306560803	0.0293980451412191	0.0145292007437348	9705	tags=71%, list=47%, signal=38%	10000/10019/25970/4215/5335/5598/5293/6195/817/3667/10782/3725/11108/5290/3551/5336/5908/57498/25/25759/356/2549/8503/5894/4790/6196/5291/5295/397/208/5170/6464/5781/2889/4893/51135/673/4804/5600/5609/1432/5970/4803/11213/6197/6654/818/4217/998/387/5580/163688/2932/7189/596/4214/3265/4908/5607/9261/2885/5602/3654/1399/6300/4915/805/10818/6655/207/5594/814/4145/9252/5605/5664/6272/7157/5879/396/36…
hsa04010	MAPK signaling pathway	275	0.386797693516452	1.46132340466962	0.000310071745987474	0.00130389144466528	0.000644413615142659	4863	tags=40%, list=24%, signal=31%	2316/2318/1436/5321/10000/5159/7786/1969/7040/55970/4609/23162/2317/1435/781/929/355/7043/4215/5921/5598/4772/3164/7042/80310/284/6195/7048/22808/3554/2246/10125/9020/3553/9693/5880/7422/23118/2252/2872/8681/3791/4615/2768/3725/6722/2064/25780/7424/782/3551/4763/3312/9064/4233/8569/7010/5908/356/7132/4775/5530/115727/5894/4790/6196/5778/2005/8605/8822/8913/3082/9344/7186/4254/208/1849/1843/2321/5…
hsa04014	Ras signaling pathway	209	0.380473101131523	1.4152417868491	0.0019363751299991	0.00582689029944683	0.00287978532129272	5040	tags=42%, list=25%, signal=32%	1436/5321/10000/5159/1969/55970/1435/83593/64926/5921/5335/23179/8831/59345/11186/5338/80310/7535/5293/284/22808/2246/10125/9846/5880/7422/2252/8681/3791/8398/25780/7424/5290/3551/4763/5336/4233/7010/5908/25/25759/356/2549/115727/26279/8503/5894/29110/4790/2784/5291/9771/8605/5295/8822/54331/3082/4254/208/10681/2321/6464/7074/9610/2324/2113/5781/2782/4303/5900/4893/2248/4804/2785/8315/9965/5970/5…
hsa04110	Cell cycle	126	0.379965867376187	1.36200664832582	0.0209894433862293	0.0465171448019135	0.0229898597544759	6466	tags=41%, list=31%, signal=28%	894/7040/4609/7709/7043/4998/8556/7042/1029/898/29882/5934/29945/10274/896/51433/1870/1017/1021/25/4172/1387/701/51343/51434/64682/1027/1030/4171/4087/8454/4176/7029/4089/8697/3065/7465/8317/1028/5933/7532/4999/1111/996/9700/545/11200/9088/10971/472/2932/5925
hsa05130	Pathogenic Escherichia coli infection	184	0.375922770674923	1.38843201006936	0.00420695988079853	0.0110300769211696	0.00545132171328664	5751	tags=42%, list=28%, signal=31%	7846/10163/2534/27128/2212/3071/4542/7099/7456/355/3688/8795/842/834/9632/3554/114548/3553/23118/64005/9138/4627/9871/24146/4615/2768/10376/3725/23191/9265/4641/1902/3551/4644/7082/25/356/7132/10061/8797/84617/9076/4790/4642/7186/9181/3569/10427/10454/10382/9826/8743/5781/55930/4645/9475/51135/5600/1432/3059/5970/10006/10095/7280/4651/5063/8936/79861/4690/203068/8737/60/7277/26999/57121/23365/851…
hsa05165	Human papillomavirus infection	304	0.375538832323343	1.42379123158962	0.000341195970471312	0.00140133048202625	0.000692570263902576	6232	tags=47%, list=30%, signal=33%	2335/894/3679/7058/10000/5159/22801/55534/23352/3910/7057/3455/3685/3913/7249/3911/5734/5526/8638/3693/2475/355/10379/3676/3696/3996/6773/3371/3716/1282/3909/3688/7297/1284/1855/4853/7248/1299/5293/5829/898/5934/1277/7422/4599/148022/896/6696/3695/5523/8324/3690/1298/3659/3678/5290/5528/3551/1017/1021/3675/356/7132/3673/5590/7450/1288/8503/1387/7059/5894/29110/23545/9223/4790/1452/4855/5291/6772/…
hsa05160	Hepatitis C	136	0.374983915344337	1.35496811466763	0.0145601192198492	0.0329359938214521	0.0162777376396137	6466	tags=48%, list=31%, signal=33%	3627/10000/4609/3455/317/355/10379/6773/4939/3716/4940/7297/23586/91543/842/4938/5293/4599/148022/3665/24146/1870/5290/3551/1017/1021/356/7132/8503/9076/5894/29110/4790/5291/6772/5295/440275/7098/7186/208/3949/949/6041/4893/10062/8837/673/1499/5970/7532/1956/3454/8737/6654/3434/7187/5465/8517/6774/3661/9021/10971/2932/7189/5925
hsa04144	Endocytosis	239	0.362307415331746	1.36027209200892	0.00507008325078032	0.0129920883301246	0.0064209935906264	7073	tags=50%, list=34%, signal=33%	3560/55616/857/27128/22905/7456/3482/11031/2060/9815/116983/5338/3561/1601/11021/30846/7048/2350/64145/1234/8394/3800/9727/3559/9265/9372/51100/3798/3312/8853/2869/5590/160/57154/254122/23396/10193/28964/1785/116986/9525/1759/84249/3949/26119/4087/26052/161/11059/30844/64744/91782/26056/50807/9798/56288/55738/30845/868/137492/9146/116985/23550/163/3480/58513/10095/3310/8027/51534/10890/51510/832/…
hsa05208	Chemical carcinogenesis - reactive oxygen species	192	-0.276228097183295	-1.42989956953385	0.00191287243647701	0.00582689029944683	0.00287978532129272	2232	tags=30%, list=11%, signal=27%	56901/5603/6714/2939/4722/292/4711/7384/1346/1339/4706/293/1537/253152/79852/1337/7417/4258/4709/10975/27089/4731/4697/1327/1350/4718/1340/4729/4695/4707/6392/1728/4710/1347/29796/4702/4694/54539/115019/1345/4726/4728/4700/10105/51079/4714/1329/1535/1349/4715/4717/2938/7381/341947/1351/9377/4696
hsa05415	Diabetic cardiomyopathy	169	-0.27794239513683	-1.38048461044276	0.00294061694838059	0.00824378084674216	0.0040742690962718	2232	tags=32%, list=11%, signal=29%	56901/5603/5332/4722/292/4711/7384/1346/1339/4706/293/1537/1337/7417/4709/10975/27089/4731/4697/1327/7137/1350/25874/4718/1340/4729/4695/4846/4707/6392/4710/1347/29796/4702/4694/54539/1345/4726/4728/4700/10105/51079/4714/1329/1535/1349/4715/4717/7381/341947/1351/9377/4696/5972
hsa05020	Prion disease	232	-0.279628259245157	-1.4265406560996	0.00109366147104736	0.00355169269805478	0.0017553295105919	2092	tags=26%, list=10%, signal=23%	4722/292/4711/5691/7384/1346/4851/1339/729/4706/293/1537/1337/7417/147700/7124/4709/10975/27089/4731/3304/4697/1327/1350/4718/1460/1340/4729/54205/5683/4695/4707/6392/4710/1347/29796/4702/4694/54539/1345/4726/4728/4700/90993/10105/51079/4714/1329/1535/1349/4715/4717/774/7381/341947/1351/3303/9377/4696/730
hsa04714	Thermogenesis	191	-0.281980702295706	-1.45707109971104	0.00156508374673189	0.00496923269723689	0.00245591089658049	2232	tags=31%, list=11%, signal=28%	56901/5603/91942/4722/4711/7384/25915/1346/1339/4706/1537/10891/51241/79133/137682/1337/111/2181/4709/10975/27089/4731/4697/1327/51287/1350/4718/1340/4729/4695/4707/6392/63976/4710/1347/29796/4702/28958/4694/54539/1345/4726/10063/11343/4728/4700/90993/388753/51079/29078/4714/1329/1349/4715/4717/7381/341947/1351/9377/4696
hsa04723	Retrograde endocannabinoid signaling	119	-0.289880851455592	-1.43765015115937	0.00838174407753202	0.0202147945399302	0.0099906237456651	1388	tags=29%, list=7%, signal=28%	2558/57030/773/56901/5603/5332/4722/4711/4706/111/4709/4731/4697/4718/4729/4695/4707/2891/4710/2556/4702/4694/54539/4726/11343/4728/4700/51079/4714/4715/4717/774/4696/2567/2568
hsa05012	Parkinson disease	224	-0.295668517868504	-1.53560778285396	0.000189358432520052	0.000862632859258016	0.000426333312983744	2252	tags=27%, list=11%, signal=25%	4128/56901/7332/4722/292/4711/5691/7384/4129/1346/1339/4706/293/1537/1337/7417/147700/111/4709/10975/27089/4731/4697/7295/1327/1350/4718/1340/7311/4729/54205/5683/4695/4707/6392/4710/1347/29796/4702/4694/54539/1345/4726/4728/4700/10105/51079/4714/7314/1329/1349/4715/4717/29986/7381/341947/1351/9377/4696/55630/51806
hsa04932	Non-alcoholic fatty liver disease	144	-0.314951203909224	-1.53192958584113	0.00246541089593829	0.00703178064232835	0.00347527027894277	2232	tags=32%, list=11%, signal=29%	56901/5603/4722/4711/7384/1346/1339/4706/1537/1337/7124/4709/10975/27089/4731/4697/1327/1350/4718/1340/4729/54205/4695/4707/6392/4710/1347/29796/4702/4694/54539/1345/4726/4728/4700/51079/4714/1329/1349/4715/4717/7381/341947/1351/9377/4696
hsa04260	Cardiac muscle contraction	71	-0.438736017738071	-1.95404680520008	0.000587031563399587	0.00213940391994516	0.00105734340074312	1950	tags=35%, list=9%, signal=32%	7384/1346/1339/1537/55799/1337/10975/27089/1327/7137/1350/1340/1347/29796/1345/1329/1349/27092/59285/7381/341947/1351/9254/9377/7134
hsa00330	Arginine and proline metabolism	45	-0.465150575156933	-1.93437945285081	0.000555110241776218	0.00204579954272584	0.00101108193061547	2347	tags=33%, list=11%, signal=30%	112817/4128/4942/6611/4129/2628/6303/2805/79814/4846/5625/548596/54498/1159/26
hsa00140	Steroid hormone biosynthesis	34	-0.483483774101897	-1.86988496730584	0.00157561036741657	0.00496923269723689	0.00245591089658049	2335	tags=41%, list=11%, signal=37%	1646/1312/220074/3292/1586/3284/7364/6716/3291/7367/79644/7923/1583/6820
hsa04975	Fat digestion and absorption	27	-0.493731678380861	-1.76214642155933	0.00721809506083185	0.0178010163906229	0.00879767819048757	1655	tags=33%, list=8%, signal=31%	84649/5319/81579/80168/8399/1208/10555/1056/335
hsa01210	2-Oxocarboxylic acid metabolism	18	-0.509531412893757	-1.66569319873591	0.014051048244043	0.0320051654447645	0.0158177005086449	2113	tags=33%, list=10%, signal=30%	162417/2875/2805/3417/3418/586
hsa00350	Tyrosine metabolism	30	-0.528566570637548	-1.9571288314677	0.00193470875358792	0.00582689029944683	0.00287978532129272	2252	tags=47%, list=11%, signal=42%	4128/1312/220074/2184/4129/259307/2805/1644/218/5409/4282/126/3081/222
hsa00360	Phenylalanine metabolism	14	-0.579289662474142	-1.78363826338356	0.0215474078876899	0.047433220048069	0.0234426055436541	2252	tags=57%, list=11%, signal=51%	4128/4129/259307/2805/1644/218/4282/222
hsa05033	Nicotine addiction	24	-0.592936964012982	-2.07911734085252	0.000398337103635644	0.00155901879566209	0.000770503512618622	2348	tags=33%, list=11%, signal=30%	2558/57030/773/2891/2556/774/2567/2568
hsa00340	Histidine metabolism	20	-0.609052603484533	-2.03228717470002	0.00215473424606313	0.00636714263701538	0.00314679064858911	43	tags=30%, list=0%, signal=30%	55748/4128/4129/218/222/26
hsa00790	Folate biosynthesis	21	-0.636386507494832	-2.18510028721329	0.000341896879639958	0.00140133048202625	0.000692570263902576	1167	tags=29%, list=6%, signal=27%	5805/6697/5092/57016/250/249
hsa00190	Oxidative phosphorylation	103	-0.654359256120449	-3.11923652573014	1e-10	6.56e-09	3.24210526315789e-09	2092	tags=49%, list=10%, signal=44%	4722/4711/7384/1346/1339/8992/4706/9296/5464/1537/9550/1337/4709/10975/27089/4731/4697/1327/1350/4718/1340/4729/54205/4695/4707/6392/4710/1347/29796/4702/4694/54539/1345/4726/10063/4728/4700/51079/4714/1329/1349/4715/4717/7381/341947/1351/479/9377/4696/525
hsa00730	Thiamine metabolism	13	-0.672738259788247	-2.01787250965863	0.00240928779509982	0.00696724932552964	0.00344337739451722	673	tags=31%, list=3%, signal=30%	122481/203/250/249
hsa03010	Ribosome	132	-0.70922377669074	-3.4771975713116	1e-10	6.56e-09	3.24210526315789e-09	3141	tags=67%, list=15%, signal=57%	6183/6203/63931/6208/6150/6123/6181/6159/6233/63875/6137/6152/6154/6129/6124/9553/6191/65008/64981/55168/6164/6210/6157/64960/25873/6139/6143/6228/51081/64928/6207/6209/6161/79590/6222/6144/64979/29093/51065/51021/6165/28998/6217/11224/51069/6201/6132/6166/6167/51121/29088/6205/6204/6156/6158/6234/65003/11222/6231/51264/64963/6235/9349/6136/6141/219927/6232/2197/6160/6188/6142/6223/100529097/6227…
hsa04950	Maturity onset diabetes of the young	12	-0.756788849641088	-2.18433571605986	0.000658382702854489	0.00232203791974487	0.00114760539037455	118	tags=42%, list=1%, signal=41%	3087/6928/3280/3171/3170
