# Supplementary material for: Identifying the Role of Oxidative Stress-Related Genes as Prognostic Biomarkers and Predicting the Response of Immunotherapy and Chemotherapy in Ovarian Cancer
Source: Oxid Med Cell Longev. 2022 Dec 12;2022:6575534. doi: 10.1155/2022/6575534 (PMC9764017; doi:10.1155/2022/6575534)
Supplement: Supplementary 15 — Supplement Table 14: signaling pathway analysis in regard to SIGMAR1. [file 6575534.f15.txt]

ID	Description	setSize	enrichmentScore	NES	pvalue	p.adjust	qvalues	rank	leading_edge	core_enrichment
hsa05310	Asthma	21	0.833579265090833	2.26727167107238	1.80128527638581e-08	1.45420835727732e-07	6.70568331388811e-08	2479	tags=81%, list=12%, signal=71%	3117/3118/3122/3113/3119/6356/3586/3123/3111/3115/2205/3127/3108/3109/2207/958/7124
hsa05150	Staphylococcus aureus infection	61	0.801953203947068	2.6854977884296	1e-10	1.14137931034483e-09	5.26315789473684e-10	2203	tags=72%, list=11%, signal=65%	3689/3117/5724/3118/719/2214/3075/718/2359/3684/3122/3113/2212/713/3119/716/3383/3868/714/728/9103/3586/6404/2357/2213/712/3123/3111/3683/1675/715/25984/3115/3872/720/2209/3127/3108/3426/3109/2215/3880/3860/6403
hsa05330	Allograft rejection	31	0.769272116223721	2.27523712294316	2.13263834263154e-08	1.68072212240724e-07	7.7501894657036e-08	3550	tags=81%, list=17%, signal=67%	3117/3118/3122/3113/3119/3586/355/3123/3111/942/3115/3127/5551/3108/3109/3592/3133/3107/958/7124/3002/3106/3134/940/356
hsa05320	Autoimmune thyroid disease	32	0.761558793745263	2.25951409666831	3.01362851955916e-08	2.26707054539564e-07	1.04539745295712e-07	3550	tags=75%, list=17%, signal=62%	3117/3118/3122/3113/3119/3586/355/3123/3111/942/3115/3127/5551/3108/3109/3133/3107/958/3002/7173/3106/3134/940/356
hsa05321	Inflammatory bowel disease	53	0.754548801248101	2.45576647901068	1e-10	1.14137931034483e-09	5.26315789473684e-10	2933	tags=70%, list=14%, signal=60%	3117/3118/2625/3122/3113/7099/4094/3119/3606/3566/7040/7097/3586/3123/3111/7042/3115/3553/7100/3127/7043/3108/3109/4790/3592/3561/3459/4772/3725/50615/6778/3594/6095/4088/7124/6774/6097
hsa05144	Malaria	46	0.74238989102106	2.36151333587804	1.34499905456114e-10	1.39123339706168e-09	6.41529154313703e-10	2479	tags=61%, list=12%, signal=54%	7058/3689/7057/4035/7099/3383/7412/3606/7040/7097/3586/5175/3683/7042/6382/3553/7043/1311/2532/2995/3592/6347/3082/6403/3820/4233/958/7124
hsa05332	Graft-versus-host disease	32	0.738521416745379	2.19116313216101	3.20981899170729e-07	1.68642870834145e-06	7.77650382284974e-07	3550	tags=72%, list=17%, signal=60%	3117/3118/3122/3113/3119/355/3123/3111/942/3115/3553/3127/5551/3108/3109/3133/3107/7124/3002/3106/3134/940/356
hsa05140	Leishmaniasis	72	0.736651567997848	2.53284469606205	1e-10	1.14137931034483e-09	5.26315789473684e-10	2953	tags=62%, list=14%, signal=54%	1536/3689/3117/3118/2214/2353/718/3684/3122/3113/2212/7099/3119/7040/7097/9103/3586/3123/4688/3111/7042/3115/3676/5743/3688/3553/2209/3127/7043/3108/1917/3109/4790/4689/653361/3592/3459/23118/3725/2215/3716/7124/5600/4792/1432
hsa04672	Intestinal immune network for IgA production	39	0.730818216517088	2.24053151157784	3.94379186357766e-08	2.77743639754086e-07	1.28073867910137e-07	2439	tags=62%, list=12%, signal=54%	3117/3118/6387/3122/3113/3119/7040/3586/3123/3111/942/3115/3676/10673/3127/3108/8741/3109/3695/56477/5284/3600/4055/958
hsa04610	Complement and coagulation cascades	68	0.725634725286643	2.47572063220977	1e-10	1.14137931034483e-09	5.26315789473684e-10	1250	tags=44%, list=6%, signal=42%	2162/5054/3689/719/11326/3075/1604/718/3684/5328/713/716/2152/714/728/3687/5055/5265/7450/712/1675/715/7056/2/720/624/2149/710/5329/3426
hsa04940	Type I diabetes mellitus	37	0.720457164307873	2.19617716977212	1.35517239803577e-07	8.01003685267569e-07	3.69360897960876e-07	3550	tags=70%, list=17%, signal=58%	3117/3118/3122/3113/3119/355/3123/3111/942/3115/3553/3127/5551/3108/3109/3592/3133/3107/5799/3382/7124/3002/3106/3134/940/356
hsa04512	ECM-receptor interaction	80	0.703807277294426	2.456967446823	1e-10	1.14137931034483e-09	5.26315789473684e-10	2225	tags=51%, list=11%, signal=46%	1277/2335/1293/7058/1292/1291/1278/22801/3381/3696/3678/7057/3909/3339/3371/3914/7450/6696/3912/3918/3910/3676/6382/3688/131873/1311/1282/3908/3690/1287/3695/961/3675/3911/3691/3685/7148/3673/8515/3693/3672
hsa05322	Systemic lupus erythematosus	46	0.697535862088875	2.218834416388	3.44285010130232e-08	2.47735518158928e-07	1.14236445008887e-07	2807	tags=65%, list=14%, signal=56%	3117/3118/2214/718/3122/3113/2212/713/3119/716/714/3586/712/3123/3111/942/715/3115/720/2209/3127/3108/3109/81/2215/87/958/7124/717/1511
hsa04658	Th1 and Th2 cell differentiation	84	0.671324074661824	2.35698707200375	1e-10	1.14137931034483e-09	5.26315789473684e-10	4750	tags=68%, list=23%, signal=52%	3117/3118/2625/2353/3122/3113/4094/3119/920/3566/3123/3111/3560/3115/864/5530/3127/4773/916/3108/6776/3109/915/4790/3592/3561/3459/4772/4851/3725/182/6778/4853/3559/3718/3716/3594/55534/6777/5600/4792/1432/7535/5335/1147/5601/3932/4854/9794/919/5594/3551/3458/4793/917/54567/5532
hsa04640	Hematopoietic cell lineage	85	0.670448201145972	2.35989723863148	1e-10	1.14137931034483e-09	5.26315789473684e-10	2479	tags=54%, list=12%, signal=48%	1436/3117/3118/3678/1604/929/3575/3684/3122/3113/3119/920/3566/3123/1438/3111/914/3115/3676/951/3554/3553/1441/290/2209/3127/4311/916/3108/925/3690/913/3109/915/909/1435/3815/3675/2057/3673/3559/945/3672/921/911/7124
hsa05323	Rheumatoid arthritis	85	0.668603358300771	2.35340361313042	1e-10	1.14137931034483e-09	5.26315789473684e-10	3140	tags=55%, list=15%, signal=47%	1513/3689/3117/3118/2353/6387/3122/3113/7099/3119/3383/4050/3606/7040/7097/3123/3111/3683/942/7042/3115/2919/6348/3553/10673/6352/3127/7043/3108/8741/10312/414062/284/3109/1435/6347/3725/535/3600/2321/7124/2921/2920/23545/523/8792/4312
hsa05145	Toxoplasmosis	107	0.668125394555275	2.40874170917249	1e-10	1.14137931034483e-09	5.26315789473684e-10	3483	tags=51%, list=17%, signal=43%	3117/3118/10000/3909/3122/3113/7099/3119/3587/7040/7097/3586/3914/3123/1234/3111/3912/23643/7042/3918/3910/3115/23533/240/3688/3127/7043/3108/3908/4261/5294/3109/4790/3592/3459/3949/23118/146850/5170/3911/3716/330/958/7124/3915/3310/5600/6774/4792/1432/1147/7132/3913/5601/3312
hsa04659	Th17 cell differentiation	98	0.660462706158031	2.36927094578804	1e-10	1.14137931034483e-09	5.26315789473684e-10	4602	tags=65%, list=22%, signal=51%	3117/3118/2625/2353/3122/3113/3119/920/3566/7040/10148/3123/861/3111/7048/3560/3115/3554/5530/3553/3572/3127/4773/916/3108/6776/3109/915/4790/3561/3459/4772/3725/50615/6778/3559/3718/196/3716/3594/6095/4088/6777/6256/3662/5600/3091/6774/4792/6097/1432/7535/5335/1147/5601/2475/3932/51561/919/5594/3551/3458/4793/917
hsa05146	Amoebiasis	90	0.659342127882203	2.33586324964845	1e-10	1.14137931034483e-09	5.26315789473684e-10	2807	tags=47%, list=14%, signal=40%	1281/1277/2335/1278/3689/929/3909/3684/7099/7040/7097/3586/3914/3912/2769/7042/3918/3910/2919/3554/5293/3553/7043/5330/1282/3908/913/1287/4790/909/3592/81/3911/87/7414/338382/911/7124/2921/3915/2920/1511
hsa04612	Antigen processing and presentation	61	0.647673800274644	2.16886290833517	9.75407293842108e-08	6.20884258195649e-07	2.8630376033827e-07	3483	tags=44%, list=17%, signal=37%	3117/3118/3122/3113/3119/920/972/1520/3123/3111/3115/3127/3108/925/4261/567/5641/3109/3133/3107/821/7124/3310/2923/3106/3134/3312
hsa05416	Viral myocarditis	55	0.645978207740869	2.11556137111889	2.43122683195439e-07	1.34122680229484e-06	6.18469983567345e-07	4361	tags=58%, list=21%, signal=46%	3689/3117/3118/595/1604/3122/3113/3119/3383/3123/3111/3683/942/5880/3115/3127/5551/8672/3108/3908/3109/3133/3107/958/3106/6444/3134/940/6442/27/1756/959
hsa04145	Phagosome	142	0.641680779029152	2.39920966436875	1e-10	1.14137931034483e-09	5.26315789473684e-10	2949	tags=45%, list=14%, signal=39%	7058/1536/3689/3117/3118/3678/7057/2214/81035/718/929/3684/3122/3113/2212/7099/8685/4360/3119/9902/4973/1520/7097/64581/9103/6441/2213/3123/4481/4688/3111/30835/715/3115/3688/2209/3127/1311/3108/10312/3690/3109/4689/23673/653361/3133/10333/535/3685/2215/8417/3673/4074/22925/3107/3693/338382/821/84617/23545/1783/200576/523/11151
hsa04974	Protein digestion and absorption	84	0.64044103007769	2.24855816326011	1.10595707565178e-10	1.20737507234791e-09	5.5674792650802e-10	1834	tags=36%, list=9%, signal=33%	1300/1281/1289/1277/1293/1290/1301/1292/1291/1278/1295/1307/50509/1803/1359/1303/1296/3784/91522/54407/131873/4311/1282/1306/1287/206358/6564/9056/1294/3783
hsa04380	Osteoclast differentiation	124	0.640334748839019	2.33384703496435	1e-10	1.14137931034483e-09	5.26315789473684e-10	4545	tags=60%, list=22%, signal=47%	2354/1513/1436/10000/2214/2353/2212/7040/9103/2213/3937/4688/7048/7042/54209/11006/3726/29760/6688/3554/10859/10288/5530/5293/3553/140885/2209/695/4773/126014/4982/5336/2355/9021/3690/6773/4790/4689/653361/1435/3459/8878/23118/4772/3725/11025/7305/2215/3716/11027/11024/7124/79168/5600/4286/10990/4792/1432/8792/9846/1147/7132/5601/54/3932/8061/1540/5468/1385/5594/3454/3551/3458/5291/5604
hsa04710	Circadian rhythm	29	0.638659370777097	1.84896508854201	0.000497208807914719	0.00148266770648443	0.000683691580347409	4055	tags=59%, list=20%, signal=47%	5187/4862/406/9572/8553/8864/5564/79365/8863/1408/6095/6097/8945/23291/51422/9575/1385
hsa04514	Cell adhesion molecules	132	0.637872336553893	2.36171699131679	1e-10	1.14137931034483e-09	5.26315789473684e-10	3623	tags=53%, list=18%, signal=44%	10686/3689/1462/3117/3118/3696/1272/6614/3684/3122/3113/5788/3119/3383/7412/920/6404/3897/5175/3123/3111/3683/942/914/3115/3676/6382/83700/80380/3688/5133/3127/94030/3108/1003/925/1366/923/3109/999/57863/79679/3695/58494/8506/3133/3685/57555/3384/3107/6403/5010/7122/958/9074/6693/257194/5797/2734/1364/947/64101/3106/4684/8516/3134/940/1002/6383/9672
hsa04620	Toll-like receptor signaling pathway	88	0.633128521507842	2.2396393296063	1e-10	1.14137931034483e-09	5.26315789473684e-10	5226	tags=61%, list=25%, signal=46%	1513/10000/2353/929/4283/6351/7099/7097/51284/388372/6696/7096/942/23643/51311/148022/6348/5293/3553/6352/7100/414062/4790/7098/3592/23118/3725/10333/3627/3665/958/7124/5600/4792/1326/1432/1147/3663/8737/5601/51135/5594/3454/3551/5291/5604/29110/9641/3576/6885/3569/6373/941/5290
hsa04061	Viral protein interaction with cytokine and cytokine receptor	90	0.631447095551158	2.23703901543922	2.03912131483746e-10	2.04530047033696e-09	9.43134260451136e-10	3559	tags=53%, list=17%, signal=44%	1436/1524/6387/4283/6351/3587/3606/6356/3586/388372/7133/6362/1234/9547/3560/2919/51554/6348/1230/6352/3572/57007/414062/8764/6367/3561/729230/1435/6347/2833/56477/6376/3559/3627/8743/4055/7124/2921/2920/3579/6369/10344/1233/53832/7132/10563/6366/6355
hsa05133	Pertussis	72	0.627915546326809	2.15897532860937	7.11571162196614e-08	4.61823636641332e-07	2.12957313763693e-07	4281	tags=53%, list=21%, signal=42%	3689/3678/2353/718/929/3684/7099/713/716/714/3586/712/3394/715/23643/148022/114548/720/3688/3553/834/710/4790/3592/3725/7124/717/5600/1432/29108/10392/5601/3659/721/51561/51135/6374/5594
hsa04933	AGE-RAGE signaling pathway in diabetic complications	99	0.626050869359132	2.24718112081644	1e-10	1.14137931034483e-09	5.26315789473684e-10	5258	tags=59%, list=26%, signal=44%	1281/1277/2335/1278/1958/5054/1536/4313/10000/595/2152/3383/7412/7040/7048/7042/7056/5293/2308/3553/7043/5330/1282/5336/50507/7424/6776/1287/4790/4772/6347/3725/185/4088/7124/6777/5600/6774/1432/5335/1729/5601/5292/5578/183/1284/5594/5291/3845/113026/5331/3576/5579/6401/3569/5290/4087/3552
hsa05152	Tuberculosis	159	0.620571913127491	2.35188330944517	1e-10	1.14137931034483e-09	5.26315789473684e-10	2953	tags=42%, list=14%, signal=36%	3689/3117/3118/10000/2214/718/929/3684/3122/3113/2212/7099/4360/3119/9902/3587/3606/972/1520/7040/7097/64581/3687/9103/3586/2213/3123/7096/3111/30835/7042/1387/3115/8877/5530/3553/2209/3127/7043/3108/10312/4261/4046/3109/4790/26253/2207/3592/3459/10333/535/1263/1509/2215/8844/22925/7421/3716/2033/7124/317/5600/23545/23365/11151/1432
hsa04670	Leukocyte transendothelial migration	103	0.611688371499721	2.20038427305771	1e-10	1.14137931034483e-09	5.26315789473684e-10	4019	tags=50%, list=20%, signal=41%	10686/1536/3689/4313/6387/3684/3383/7412/10411/5175/10451/5829/7409/4688/3683/5880/4318/3676/83700/3688/5293/1003/5336/1366/4689/653361/1495/58494/83593/81/87/7414/1500/5010/5781/7122/9074/9475/5600/1432/1364/7070/5908/5335/3702/5747/399/9564/90952/5578/7408/7430
hsa05142	Chagas disease	98	0.607004286947887	2.17750011866727	5.05827691151652e-10	4.92438134621167e-09	2.27074350516996e-09	5231	tags=56%, list=25%, signal=42%	5054/10000/2353/718/7099/713/7040/7097/714/3586/712/355/7048/2769/7042/148022/6348/624/5293/3553/6352/7043/5330/916/414062/915/4790/3592/3459/6347/3725/10333/7124/5600/4792/1432/1147/7132/5601/2774/356/8837/51135/919/5594/3551/3458/5291/917/5331/3576/9630/3569/5290/4087
hsa04613	Neutrophil extracellular trap formation	102	0.596968584426255	2.14536363729558	3.19674474439256e-09	2.85979056863227e-08	1.3187140481847e-08	1398	tags=32%, list=7%, signal=30%	1536/3689/10000/2214/718/2359/3684/2212/7099/7097/51284/64581/728/6404/2357/7450/4688/3683/5880/27180/51311/5293/834/2209/5330/5336/3690/837/4790/4689/1182/51564/653361
hsa04510	Focal adhesion	192	0.595889153867577	2.28968502645095	1e-10	1.14137931034483e-09	5.26315789473684e-10	4118	tags=52%, list=20%, signal=42%	1277/2335/1293/7058/1292/1291/1278/22801/3381/3696/3678/7057/10000/5156/595/5159/3909/3371/5154/10451/3914/7450/5829/6696/25759/7409/3912/5728/3918/5880/3910/1956/3676/3688/5293/131873/2064/1311/1282/3908/3690/80310/64098/5155/7424/55742/1287/894/3695/81/5170/2317/3725/3675/3911/3691/824/3685/3791/87/7148/3082/7414/3673/8515/23396/56034/2318/4660/3693/2321/3672/4233/330/4638/1793/3479/3915/9475/6…
hsa05340	Primary immunodeficiency	32	0.586373186822001	1.73974549622994	0.00300912571674983	0.00778141103315776	0.00358818444842702	5647	tags=62%, list=27%, signal=45%	3575/5788/920/29760/695/916/925/4261/915/3561/3718/958/7535/3932/959/973/84876/6891/5993/29851
hsa04657	IL-17 signaling pathway	83	0.585881408179319	2.05201015649426	2.71495390510734e-07	1.47319629932874e-06	6.79324100501406e-07	5119	tags=55%, list=25%, signal=42%	2354/4322/6280/2353/6279/3934/6356/7128/4318/2919/5743/3553/727897/6278/4790/9618/23118/6347/3725/5597/3627/7124/7188/2921/5600/2920/4792/1432/2932/4312/1147/5601/23765/8061/6361/6374/5594/3551/3458/29110/132014/9641/84818/3576/6885/3569
hsa05414	Dilated cardiomyopathy	83	0.584204584829201	2.04613719569187	3.49063417611159e-07	1.77753832660452e-06	8.19663085888551e-07	4595	tags=55%, list=22%, signal=43%	22801/3696/3678/7040/5350/7042/3676/3688/1674/115/7043/3908/3690/113/4000/3695/3675/489/786/3691/3685/112/3673/8515/7139/27092/3693/3672/7124/3479/782/781/775/6444/8516/488/7134/6442/183/7168/784/93589/1756/783/3680/7171
hsa05134	Legionellosis	56	0.583770559006924	1.91875166336953	4.97863922626528e-05	0.000191619719057419	8.83601821062993e-05	3483	tags=43%, list=17%, signal=36%	3689/718/929/3684/7099/3606/7097/2919/3553/834/7100/1917/4790/3592/57396/7124/2921/3310/317/2920/4792/58484/29108/3312
hsa04064	NF-kappa B signaling pathway	102	0.578779761694801	2.07999731834468	3.09279955272493e-08	2.27492589322656e-07	1.0490197313336e-07	5011	tags=56%, list=24%, signal=42%	84433/6387/929/6351/7099/5328/3383/4050/7412/388372/4616/7128/23643/2919/148022/29760/3554/5743/60401/3553/10673/695/5336/4790/23085/23118/597/330/4055/958/7124/7188/2921/2920/4792/4067/8792/7535/5335/7185/1147/7132/8737/6366/3932/8837/51135/8740/1540/29775/959/3551/6357/3576/6885/5579/1647
hsa05235	PD-L1 expression and PD-1 checkpoint pathway in cancer	88	0.576666527948645	2.03990973741861	1.38038017051438e-07	8.01589186737297e-07	3.69630885917978e-07	4750	tags=49%, list=23%, signal=38%	10000/2353/7099/920/7097/5728/1956/148022/5530/5293/5133/4773/916/915/4790/3459/4772/3725/3716/5781/5600/3091/6774/4792/1432/7535/5335/4215/1147/10125/940/2475/3932/919/5594/3551/3458/5291/5604/4793/3845/917/5532
hsa04621	NOD-like receptor signaling pathway	156	0.568352912026331	2.1446084571636	1e-10	1.14137931034483e-09	5.26315789473684e-10	5337	tags=49%, list=26%, signal=37%	1536/84168/7099/118429/5027/3606/199713/2635/10628/7128/23710/2919/148022/114548/6041/51393/3710/2634/3553/834/6352/7226/115362/5330/837/6773/4790/7158/140609/84674/23118/115361/6347/3725/3428/9447/54822/3716/9051/55054/330/3665/7124/7188/2921/5600/2920/3708/4792/1432/58484/1147/29108/10392/8737/114769/5601/9927/51135/5586/5594/3454/3551/55072/29110/4793/4939/9641/5331/64127/3576/6885/820/3569/22…
hsa05410	Hypertrophic cardiomyopathy	79	0.566439957478255	1.97172082762842	4.63873747719254e-06	2.0748947364199e-05	9.56780845224634e-06	4595	tags=56%, list=22%, signal=43%	22801/3696/3678/7040/7042/3676/3688/1674/7043/3908/3690/4000/3695/3675/489/786/3691/5564/3685/3673/8515/7139/27092/3693/3672/7124/3479/782/781/775/6444/8516/488/7134/6442/51422/183/7168/784/93589/1756/783/3680/7171
hsa05412	Arrhythmogenic right ventricular cardiomyopathy	69	0.565049077153238	1.92801632335143	1.48269319228526e-05	6.29194162367208e-05	2.90135644914121e-05	4463	tags=55%, list=22%, signal=43%	22801/3696/3678/2697/3676/1832/3688/1674/3908/3690/1824/4000/1495/3695/3675/489/786/3691/3685/3673/8515/27092/3693/3672/782/781/775/6444/8516/488/3728/6442/784/1829/93589/1756/783/3680
hsa04668	TNF signaling pathway	109	0.563266834433531	2.03361983264475	4.05382977825655e-08	2.79545345125608e-07	1.28904674966491e-07	5459	tags=57%, list=27%, signal=42%	3976/10000/2353/4323/90993/3383/7412/355/4217/7133/7128/4318/2919/3726/5743/5293/3553/6352/64764/9021/7424/4790/1435/23118/6347/3725/182/3600/6376/3627/330/7124/7188/2921/5600/2920/4792/1326/1432/7185/1147/7132/8737/197259/5601/83737/3659/8837/1385/6374/5594/3551/5291/5604/8809/64127/6885/6401/3569/5290/1906/7187
hsa04660	T cell receptor signaling pathway	97	0.562540657033743	2.014726047218	1.82531805510436e-07	1.0240343665077e-06	4.72205384460539e-07	5226	tags=55%, list=25%, signal=41%	84433/10000/2353/5788/920/3586/10451/3937/7409/5530/5293/5133/4773/916/925/868/915/4790/4772/5170/3725/7124/5600/4792/1326/1432/7535/2932/5335/1147/3702/10125/5063/5601/940/6655/3932/919/5594/959/3551/3458/5291/5604/4793/3845/917/5532/1493/6885/5777/9402/5290
hsa04936	Alcoholic liver disease	120	0.561896883643229	2.04785867852761	4.93945769257578e-09	4.30252762169101e-08	1.98399270200412e-08	3894	tags=43%, list=19%, signal=35%	719/10000/595/718/929/7099/713/714/728/712/355/4217/23643/2919/148022/720/2308/3553/64900/50507/4790/3592/125/23118/10645/23175/5564/37/31/7124/2921/6720/29896/717/5600/2920/4792/1432/2932/1147/7132/32/8737/5465/2309/5601/356/23765/1374/51422/721/51135
hsa05135	Yersinia infection	133	0.561061025296795	2.08118483091406	1.1099321573451e-09	1.04967869737494e-08	4.84030564857261e-09	4961	tags=53%, list=24%, signal=40%	2335/3678/10000/2353/2212/7099/920/3606/3586/10451/5829/3937/7409/7456/5880/3676/148022/114548/3688/5293/3553/834/7454/4773/925/4790/9815/6196/23118/4772/6347/6195/3725/23396/7124/1793/9475/5600/8935/23365/4792/1432/58484/10163/7535/2932/5335/8394/1147/9844/29108/5747/5601/10095/9564/3932/391/51135/5586/147179/5594/3551/5291/5604/29110/3984/1398/10096/3576/6885
hsa04650	Natural killer cell mediated cytotoxicity	101	0.556952444002417	2.00110671352694	1.52684573370478e-07	8.7135506526945e-07	4.01801508869678e-07	5008	tags=51%, list=24%, signal=39%	3689/2214/3383/10451/355/25759/3937/7409/3683/5880/5530/5293/5551/4773/5336/962/100507436/2207/6452/3459/4772/3133/7305/2215/3384/3107/5781/8743/7124/3002/4068/6464/7535/5335/3106/356/6655/3932/5578/919/5594/3454/154064/51744/3458/5291/5604/3845/80328/5532/5579/5777
hsa05205	Proteoglycans in cancer	191	0.556768536959253	2.13949448110396	1e-10	1.14137931034483e-09	5.26315789473684e-10	5256	tags=55%, list=26%, signal=41%	4060/7476/1277/1634/2335/1278/3481/4313/7078/3678/7057/10000/595/7099/5328/3339/7474/8321/7040/7097/10451/5829/355/3059/7409/7042/117581/4318/1956/6382/3688/3710/5293/5329/2064/5336/3690/2065/6548/7483/7472/5170/2317/2549/3685/3791/3082/3673/1839/8324/2318/4660/7157/3693/5781/4233/10818/7124/3479/9475/8325/5600/22808/2017/3091/8826/6774/1655/3708/23365/1432/5335/8323/2099/5747/2475/2066/356/6383/…
hsa04062	Chemokine signaling pathway	179	0.553971330865868	2.12173845840737	1e-10	1.14137931034483e-09	5.26315789473684e-10	4972	tags=53%, list=24%, signal=40%	1524/10000/6387/4283/6351/3055/6356/388372/10451/5829/25759/6362/7409/1234/1794/9547/5880/2919/23533/2268/6348/1230/5293/58191/6352/7454/115/5330/54331/414062/5336/113/5294/6773/10663/4790/653361/6367/729230/146850/6347/2833/56477/112/6376/3718/3627/57580/2921/6777/9475/2788/2920/3579/6774/6369/6464/4792/10344/4067/2932/5908/5335/1233/1147/9844/3702/408/2309/10563/5747/6366/6355/6655/9564/55970/6…
hsa04625	C-type lectin receptor signaling pathway	98	0.552578709314628	1.98225981426868	4.93370235190085e-07	2.43739623653609e-06	1.1239384776522e-06	5383	tags=56%, list=26%, signal=42%	1959/10000/1960/64581/3586/30835/114548/5743/3710/5530/5293/3553/834/4773/5336/868/4046/6773/4790/26253/6367/2207/3592/4772/3725/1263/8844/5781/7124/5600/22808/3708/23365/4792/1432/1147/29108/5601/3659/51561/9261/1540/6361/5594/3551/5291/3845/4193/5532/9641/3569/5290/64170/5971/4791
hsa04662	B cell receptor signaling pathway	78	0.551216169645908	1.9155800523536	8.19331013336262e-06	3.6159808721907e-05	1.66741048328081e-05	5008	tags=56%, list=24%, signal=43%	84433/10000/2353/10451/2213/27071/7409/5880/3635/11006/29760/10859/10288/5530/5293/695/4773/118788/5336/4790/4772/3725/11025/11027/11024/79168/10990/4792/4067/2932/1147/6655/5594/3551/5291/5604/4793/3845/3636/5532/973/25780/5579/5777
hsa05417	Lipid and atherosclerosis	189	0.548530666396257	2.10578621378329	1e-10	1.14137931034483e-09	5.26315789473684e-10	5226	tags=52%, list=25%, signal=39%	1536/10000/2353/929/7099/3383/7412/3606/4973/7097/10451/355/4217/7409/4688/23643/4318/2919/148022/114548/6348/5530/5293/3553/834/6352/4773/5330/414062/9619/6648/4790/4689/653361/3592/3949/23118/4772/5170/6347/19/3725/10333/7157/6403/8743/3665/958/7124/2921/9475/3310/317/6256/5600/2920/6774/3708/4792/1432/4067/2932/5908/5335/4312/1147/29108/7132/5747/5601/3312/356/2081/51135/5578/5468/22926/5594/5…
hsa05143	African trypanosomiasis	33	0.546705845992044	1.62175258381914	0.0106262296792317	0.0232709043550381	0.0107307398043585	5438	tags=61%, list=26%, signal=45%	3383/7412/3606/3586/355/3910/3553/5330/3592/7124/356/5578/8542/2150/3458/5331/5579/6401/3569/3043
hsa04664	Fc epsilon RI signaling pathway	60	0.540711337167636	1.80314026149731	0.000247191371321085	0.000779241370545517	0.000359325802922881	4590	tags=50%, list=22%, signal=39%	10000/241/10451/3937/7409/5880/3635/240/2205/5293/695/5336/2207/5170/7124/8681/5600/1432/4067/9846/5335/5601/255189/6655/8605/5578/5594/5291/5604/3845
hsa04060	Cytokine-cytokine receptor interaction	236	0.540542584657961	2.11834846391436	1e-10	1.14137931034483e-09	5.26315789473684e-10	4944	tags=54%, list=24%, signal=42%	1436/1524/3976/6387/3624/3575/4283/6351/3587/4050/920/3606/3566/7040/1439/6356/3586/10148/388372/355/1438/7133/6362/1234/652/9547/7048/7042/9180/3560/2919/51554/3603/658/3554/6348/1230/60401/3553/1441/10673/58191/6352/3572/9518/7292/8784/7043/94/57007/4982/8741/414062/5008/8764/10663/8742/3557/6367/939/8744/3592/3561/729230/1435/3459/6347/2833/2690/50615/56477/944/2057/51330/3600/6376/3559/3627/3…
hsa04340	Hedgehog signaling pathway	47	0.535364563492799	1.70834655890159	0.00235889645664579	0.00614798997755714	0.00283497709252913	5601	tags=53%, list=27%, signal=39%	595/2737/2121/1452/894/339745/2619/84976/51684/57154/53944/91653/2932/64750/8945/408/23291/23288/8452/1456/50937/64399/55733/1954/11127
hsa05120	Epithelial cell signaling in Helicobacter pylori infection	68	0.535158378977349	1.82585341379685	7.01403123566319e-05	0.000257960482111613	0.000118951406920604	3461	tags=43%, list=17%, signal=36%	1956/2919/83700/6352/102/10312/5336/4790/6868/58494/3725/535/1839/5781/4233/7082/2921/5600/2920/3579/23545/4792/523/1432/4067/5335/1147/10392/5601
hsa04216	Ferroptosis	39	0.528025043990254	1.61881124912378	0.0106863367430991	0.0232709043550381	0.0107307398043585	3003	tags=31%, list=15%, signal=26%	1536/3162/64116/2180/30061/1356/10162/55240/2495/7157/4891/8031
hsa04072	Phospholipase D signaling pathway	133	0.526624174084762	1.95344569179098	1.04609371875252e-07	6.41216705383488e-07	2.95679511148372e-07	4001	tags=44%, list=19%, signal=35%	10000/5156/5159/10411/5154/27128/25759/10161/1956/23533/2205/8877/2149/5293/554/115/57121/5330/5336/113/80310/5294/5155/2207/146850/3815/2549/112/23396/56034/9265/185/5781/5338/1606/1609/1902/3643/2846/56895/8681/22808/552/3579/2768/6464/9846/5335/8394/9267/255189/2475/6655/5737/8605/5578/183/56894
hsa04611	Platelet activation	111	0.524844314081188	1.89607246703564	1.30738645730716e-06	6.09499883617843e-06	2.81054167990419e-06	4281	tags=42%, list=21%, signal=34%	1281/1277/1278/10000/2212/54518/7450/3937/83706/23533/3688/3710/2149/5293/695/115/5592/5330/5336/6916/3690/113/5294/2207/8773/146850/64805/112/3673/4638/8681/9475/5600/3708/23365/1432/4067/5908/10125/255189/83660/5739/8605/6786/7408/6915/5594
hsa04151	PI3K-Akt signaling pathway	311	0.51597507439021	2.06854585779862	1e-10	1.14137931034483e-09	5.26315789473684e-10	2778	tags=35%, list=14%, signal=31%	1277/2335/1293/7058/1292/1291/1278/22801/3481/1436/3381/3696/3678/7057/10000/5156/595/5159/3909/3575/7099/90993/3164/6446/3566/3371/5154/374/7097/3914/7450/6696/8817/2252/3912/10161/5728/3918/9180/3560/3910/1956/3676/23533/4170/3688/2149/5293/1441/131873/57121/54331/2064/1311/118788/1282/1969/3908/64764/3690/2065/284/80310/5008/1946/5294/5155/7424/1287/4790/894/3561/3695/1435/146850/3815/5170/367…
hsa05130	Pathogenic Escherichia coli infection	184	0.51582632062313	1.97964154976164	1.21201434339439e-09	1.11437985462096e-08	5.13865730386512e-09	5025	tags=47%, list=24%, signal=36%	10686/2353/2212/7099/3606/27128/3071/355/3059/4542/7456/4629/114548/3554/3688/2149/4641/3553/834/7100/9871/4644/57121/79784/1366/837/10802/4790/10427/23118/3725/23191/55930/4643/9265/5010/5781/8743/7122/7082/7124/1902/2846/9074/9632/84617/4645/4642/9475/4651/5600/2017/23365/2768/4792/10006/1432/1364/64005/10163/4628/1147/29108/4627/7132/9267/8737/5063/5601/356/10095/4646/51135/9181/7430/147179/55…
hsa04630	JAK-STAT signaling pathway	130	0.515113063657684	1.89901105941079	1.16523037617881e-06	5.50987506450268e-06	2.54072788790869e-06	3869	tags=42%, list=19%, signal=35%	3976/10000/5156/595/5159/3575/3587/3566/5154/1439/3586/1438/9180/3560/1956/1387/4170/5293/1441/3572/9021/5008/5155/6773/6776/894/3592/3561/3459/2690/50615/6778/2057/3600/3559/3718/3716/3594/2033/5781/30837/3953/6777/3574/8554/6774/10401/53832/3597/3601/10254/2475/6655/5292/51561
hsa04750	Inflammatory mediator regulation of TRP channels	87	0.510667665772666	1.80407845247119	0.000104930976060203	0.00036560161132555	0.000168587163753235	6463	tags=56%, list=31%, signal=39%	59341/3554/624/5732/51393/3710/5293/3553/115/5330/5336/113/3269/5734/5583/112/3357/239/5029/3479/8681/5600/3708/1432/40/5335/5601/255189/8605/5578/2150/818/5291/817/5331/5579/623/5290/111/162514/79054/3556/8398/5599/100137049/3709/5295/196883/5606
hsa05211	Renal cell carcinoma	65	0.509333125486685	1.72621132965333	0.000995023250380958	0.00281498030663331	0.00129805102388879	6473	tags=57%, list=32%, signal=39%	10000/7040/7042/1387/5293/112399/7043/2113/5155/2034/405/3725/2549/3082/2033/5781/4233/3091/7039/5908/5063/6655/54583/1026/5594/5291/5604/3845/1398/5290/7030/201163/998/5295/8453/7428/6513
hsa04010	MAPK signaling pathway	275	0.505934718176168	2.01110422167748	1e-10	1.14137931034483e-09	5.26315789473684e-10	5011	tags=48%, list=24%, signal=37%	1843/3481/1436/10000/5156/2353/5159/929/3164/5154/7040/374/4616/5921/355/4217/8817/2252/1847/5924/7048/7042/5880/1956/8912/3554/115727/4208/5530/3553/7043/57551/2064/1850/1969/2065/284/80310/1946/5155/7424/1848/9064/4790/6196/1435/23118/4772/10746/3815/6195/2317/3725/51347/786/9693/2261/3791/3082/5801/2246/11221/2005/56034/2318/27092/7157/2321/51701/9448/4233/4763/7124/3643/3479/782/781/8681/775/…
hsa04928	Parathyroid hormone synthesis, secretion and action	97	0.505507399547294	1.81046278556943	3.51979663936466e-05	0.000139886677621019	6.45049077915337e-05	5718	tags=52%, list=28%, signal=37%	4322/1958/2625/2353/4323/90993/9935/860/1956/4208/3710/5142/115/5330/4209/11214/5141/5143/64764/113/10568/5744/112/1839/64386/7421/5338/4205/6256/3708/2768/4040/6667/408/5578/1385/632/1026/5594/5604/4326/5331/5579/9365/6257/111/9826/9138/5337/10672
hsa04520	Adherens junction	65	0.504528893589188	1.70992902026335	0.00123692717859418	0.00341185746762229	0.00157328456926453	3102	tags=42%, list=15%, signal=35%	6591/7048/5880/1956/1387/5795/7454/10580/2064/999/1495/81/5787/87/7414/1500/51701/2033/4233/4088/7082/4008/3643/8826/5797/10163/2241
hsa05167	Kaposi sarcoma-associated herpesvirus infection	177	0.503751492758313	1.93260138097273	1.17731377879215e-08	9.99207335333849e-08	4.6075707941933e-08	4774	tags=46%, list=23%, signal=35%	7538/10000/2353/595/718/9976/3383/3055/355/5925/1234/942/1387/2919/23533/148022/5743/1230/3710/5530/5293/3572/4773/54331/5336/5294/5155/6773/4790/100507436/7098/131450/3459/4772/146850/3133/3725/8678/3107/57580/3716/7157/2033/3665/2921/1827/2788/5600/3091/2920/6774/3708/4792/1432/4067/2932/5335/3106/1233/1147/7132/3134/5601/2475/22863/7316/9261/55970/1385/1026/285/5594/3454/3551/5291/5604/29110/3…
hsa05202	Transcriptional misregulation in cancer	156	0.502733232370389	1.8970008229478	1.35000237230489e-07	8.01003685267569e-07	3.69360897960876e-07	5423	tags=54%, list=26%, signal=40%	1436/929/3684/4094/5328/4299/5154/4616/861/5218/942/2115/7048/4318/860/3560/2313/64332/6688/6935/4208/2308/2209/6692/1848/4790/894/3695/55589/8864/3486/26471/2119/8013/64919/221037/2005/7157/597/4005/2321/2120/51804/4233/330/958/3479/9611/3248/3002/6256/4286/1655/4066/51274/905/7185/6667/51426/4086/7849/5747/3398/5090/3728/8861/5468/1026/85414/7850/4193/3087/2118/8938/904/3576/1647/5966/3569/3480…
hsa01521	EGFR tyrosine kinase inhibitor resistance	78	0.496723440513122	1.72620755083187	0.000478536071825063	0.00143995854340087	0.000663997420235734	5226	tags=51%, list=25%, signal=38%	10000/5156/5159/5154/25759/558/5728/1956/5293/2064/5336/2065/80310/5155/2549/2261/3791/3082/56034/3716/4233/4763/3479/7039/6774/6464/2932/5335/2309/2475/6655/5578/5594/5291/5604/3845/5579/3569/3480/5290
hsa04666	Fc gamma R-mediated phagocytosis	91	0.496399538913794	1.7583015435844	0.000134879191860867	0.000450959722282292	0.000207947717382517	4972	tags=49%, list=24%, signal=38%	10000/2214/2212/5788/3055/10451/2213/7409/3985/5880/3635/55616/8877/8853/5293/7454/2209/5336/50807/653361/2215/23396/4082/5338/1793/8681/4651/4067/9846/10163/5335/8394/255189/10095/8605/5578/7408/5594/5291/5604/3636/3984/1398/10096/5579
hsa04912	GnRH signaling pathway	84	0.493554551412619	1.73284668450802	0.000351097682830616	0.00108610591604611	0.000500827978459806	6873	tags=55%, list=33%, signal=37%	1958/4313/4323/1956/3710/115/5330/113/10746/3725/112/1839/5338/8681/775/5600/3708/1432/4216/4215/5601/255189/6655/8605/5578/5594/818/4214/5604/3845/817/5331/5579/111/5337/776/998/5599/2185/100137049/3709/196883/5606/6714/6654/163688
hsa05164	Influenza A	148	0.487650259069978	1.83009518485909	4.04966525079942e-06	1.83621807947207e-05	8.46721645805215e-06	5258	tags=48%, list=26%, signal=36%	3117/3118/10000/3122/3113/7099/3119/3383/3606/51284/355/3123/3111/1387/7177/3115/148022/114548/64499/6041/5293/3553/834/6352/3127/3108/9021/4261/6773/3109/4790/7098/3592/3459/56649/6347/3627/3716/4928/2033/8743/3665/7124/317/4792/1147/29108/7132/5611/356/23430/10241/51135/5578/5594/3454/3551/3458/5291/3841/5604/29110/4793/4939/9641/8766/3576/5579/3569/5290/3552
hsa05418	Fluid shear stress and atherosclerosis	134	0.484598907593969	1.79558797098868	1.15094060088136e-05	4.94754985573674e-05	2.2814270284046e-05	4720	tags=40%, list=23%, signal=31%	1843/4313/10000/2353/59341/10365/3383/7412/5154/5175/4217/4688/3162/652/7056/5880/4318/658/6382/3554/4208/5293/3553/1003/3690/5155/4790/653361/8878/6347/3725/3685/3791/2949/7157/4205/7124/5600/1432/1147/7132/5747/5601/6383/858/659/9181/5607/3551/3458/5291/657/7850/92
hsa04350	TGF-beta signaling pathway	91	0.484325301778638	1.71553327301186	0.000257467968853099	0.000803980166890338	0.000370733420890758	4720	tags=42%, list=23%, signal=32%	1634/2200/7057/3624/7040/8646/652/7048/7042/1387/658/7043/2331/4681/26585/2033/4088/7124/285704/57154/3397/64750/6667/57817/64388/650/4086/3398/79875/3399/659/4756/353500/5594/3458/657/9765/92
hsa04370	VEGF signaling pathway	56	0.482884165379653	1.58715574336805	0.0099674687689747	0.0219958584891448	0.0101427873459246	5226	tags=48%, list=25%, signal=36%	10000/5829/25759/5880/5743/8877/5530/5293/4773/5336/3791/8681/5600/1432/5335/5747/255189/8605/9261/5578/5594/5291/5604/3845/5532/5579/5290
hsa05215	Prostate cancer	93	0.482357000265374	1.71418739574755	0.000555143740119049	0.0016261290086673	0.000749844828293079	4630	tags=45%, list=23%, signal=35%	10000/5156/595/5159/5328/90993/5154/5925/5728/4318/1956/1387/6935/5293/2308/2064/64764/80310/6692/5155/4790/5170/2119/56034/7157/2033/3479/7039/4792/2932/1147/2475/6655/1385/1026/5594/3551/5291/5604/3845/7850/4193
hsa04722	Neurotrophin signaling pathway	115	0.480500962041472	1.74928797410377	4.96509635439947e-05	0.000191619719057419	8.83601821062993e-05	4855	tags=42%, list=24%, signal=32%	10000/10019/4217/25759/5293/397/5336/11213/4145/4790/6196/5170/6195/3725/2549/7157/5781/10818/3667/57498/5600/6464/4792/1432/2932/5908/5335/4215/5663/11108/3656/2309/5601/356/6655/51135/9261/5607/5594/818/4214/3551/5291/5604/4793/3845/817/1398
hsa04935	Growth hormone synthesis, secretion and action	104	0.480253880159863	1.72993040628861	0.000177181318980614	0.000569388510510518	0.000262557907533869	6463	tags=54%, list=31%, signal=37%	10000/2353/90993/25759/1387/3726/3710/5293/115/5330/64764/5336/9021/113/6776/2690/3486/112/2033/3667/3479/6777/775/5600/6774/3708/6464/1432/2932/5335/5747/5601/2475/6655/9564/5578/1385/5594/4214/5291/5604/3845/1398/5331/5579/5290/111/776/51738/8660/5599/3709/5295/9586/196883/5606
hsa05162	Measles	122	0.476146377148937	1.7355163558416	0.000125540175955208	0.000428389672589422	0.0001975401574987	5258	tags=46%, list=26%, signal=34%	10000/2353/595/7099/7097/51284/2213/355/7128/30835/3560/5293/3553/916/868/6773/6776/915/4790/894/3592/3561/23118/3725/3559/3718/3716/7157/3665/4179/6777/3310/317/6774/4792/2932/1147/5601/940/3312/356/51135/440275/3454/3551/5291/9451/29110/4793/917/4939/9641/6885/3569/5290/3552
hsa05221	Acute myeloid leukemia	66	0.475464477909695	1.61186829379794	0.00425717852713532	0.0108394314806292	0.00499830677274997	4590	tags=42%, list=22%, signal=33%	1436/10000/595/929/3684/861/6688/5293/2209/6776/1848/4790/3815/8864/597/6777/6774/1147/2475/6655/3728/5292/5594/3551/5467/5291/5604/3845
hsa05206	MicroRNAs in cancer	189	0.473998422836109	1.81966005787952	3.59640368645716e-07	1.80365093972321e-06	8.31704201812261e-07	4630	tags=48%, list=23%, signal=38%	7078/3678/7057/5156/595/5159/5328/3371/5154/9839/407018/407007/3162/5728/7042/407010/406984/4318/1956/1387/6935/4170/5743/5293/407006/2064/5336/3690/2065/1946/5155/407011/4790/894/407019/23414/406983/442891/4851/324/407040/10253/2261/7148/4853/7431/4082/406976/7157/2033/27086/4233/3667/599/6624/900/6774/6464/5335/442898/406896/4363/2475/442903/6655/3236/5292/4854/659/5243/960/5578/7430/9759/7168/…
hsa04213	Longevity regulating pathway - multiple species	57	0.470363142693787	1.55197257297236	0.0186530602194745	0.0393258785518857	0.0181340511687818	6453	tags=53%, list=31%, signal=36%	10000/5293/2308/115/113/1410/6648/5564/112/3667/3643/3479/3310/2309/3312/2475/51422/5291/3845/847/3480/5290/111/3305/6198/5565/8660/5295/5562/196883
hsa04810	Regulation of actin cytoskeleton	199	0.470336566918399	1.81462961103006	3.3465076970271e-07	1.7307719495562e-06	7.9809805274495e-07	3796	tags=39%, list=18%, signal=32%	2335/22801/3689/3696/3678/5156/5159/6387/3684/5154/3687/3071/10451/5829/8817/2252/7409/3683/3985/4629/5880/1956/3676/9459/624/3688/2149/5293/57121/79784/3690/80310/5155/6548/3695/54434/81/3675/23191/3691/324/2261/3685/87/85464/7414/3673/2246/8515/23396/56034/4660/3693/3672/4638/1902/2846/1793/9475/22808/8826/23365/2768/200576/10163/8394/4628/1729/4627/8516/5063/5747/6655/10095/9564/55740/8396
hsa04917	Prolactin signaling pathway	63	0.469019688499796	1.5810890402997	0.00472243953720804	0.0116651304986258	0.00537905524662345	4590	tags=41%, list=22%, signal=32%	10000/2353/595/25759/5293/9021/6776/4790/894/30837/6777/5600/6774/6464/1432/8792/2932/2099/2309/5601/6655/3659/5594/5291/5604/3845
hsa04142	Lysosome	129	0.468534545312067	1.72227895400919	9.59748553093388e-05	0.000337954011780757	0.000155838230905421	5588	tags=50%, list=27%, signal=36%	1513/7805/1520/2799/3482/1519/4125/10312/5641/79158/26503/6556/9516/535/23312/1509/3074/1510/3425/410/4074/5660/1521/5476/3988/1200/23431/4891/1522/411/1511/23545/2760/26088/164/2517/3073/950/1497/1657/2548/138050/54/6609/3423/968/4864/1213/256471/84572/162/57192/8546/4126/427/23062/22901/8763/537/2629/23335/2588/4668/23163
hsa04071	Sphingolipid signaling pathway	115	0.46786804492243	1.70329720251343	0.000149418941812351	0.000494576697398881	0.000228060490134641	4972	tags=42%, list=24%, signal=32%	10000/4217/5728/140/5880/2205/624/8877/5293/5330/1901/4790/2207/5170/166929/1509/55304/130367/259230/8879/7157/5338/7124/9475/8560/9517/81537/5600/79603/8698/2768/1432/9846/7132/5601/4363/5525/6609/5526/5578/5594/5291/5604/3845/427/5331/29956/5579
hsa04068	FoxO signaling pathway	123	0.467772205934687	1.7052431599675	7.97948813778624e-05	0.00029024292017662	0.000133837568534298	4630	tags=43%, list=23%, signal=34%	10000/595/10769/3575/10365/6446/7040/3586/4616/5728/7048/23710/7042/1956/1387/80854/5293/2308/7043/1901/6648/894/5170/5934/5564/1263/114907/51701/2033/8743/4088/3667/3643/3479/5600/6774/8698/1432/901/1147/2309/5601/356/6655/51422/116986/1026/5594/3551/5291/5604/3845/4193
hsa04929	GnRH secretion	58	0.467531596192227	1.54661062627528	0.0115597617256572	0.0248459813713801	0.0114570434054703	5747	tags=41%, list=28%, signal=30%	10000/6696/8912/3710/5293/5330/2550/3783/775/3708/2852/408/5578/8913/5594/5291/5604/3845/5331/5579/84634/5290/3762/776
hsa04926	Relaxin signaling pathway	121	0.46682432994868	1.70147214012198	0.000130600245303987	0.000441108991792037	0.000203405322976134	4684	tags=39%, list=23%, signal=30%	1281/1277/4322/1278/4313/10000/2353/90993/7040/25759/59/7048/2769/4318/1956/5293/115/5330/54331/1282/64764/113/7424/1287/4790/3725/3640/112/2788/5600/6464/4792/1432/4312/408/5601/6655/5578/55970/59350/1385/1284/5594/5291/5604/3845/2791
hsa04919	Thyroid hormone signaling pathway	115	0.466342544121435	1.69774353994774	0.000157495428487973	0.000516148384450683	0.00023800768244665	5226	tags=44%, list=25%, signal=33%	10000/595/1734/5350/23389/652/1387/5293/2308/10231/5330/5336/3690/5469/8202/6548/5170/4851/489/3685/1735/4853/10499/5208/7157/8850/2033/9611/1827/9969/6256/3091/2932/5335/9882/2099/488/2475/4854/5578/5594/5291/5604/3845/8648/113026/4193/5331/5579/6257/5290
hsa04012	ErbB signaling pathway	82	0.465767456860968	1.63265764048833	0.0021684916488618	0.00574216588618606	0.00264784243439968	4972	tags=45%, list=24%, signal=34%	10000/374/25759/1956/685/5293/2064/5336/2065/868/6776/3725/2549/1839/6777/7039/6464/2932/5335/5063/5747/5601/2475/2066/6655/27/5578/1026/5594/818/5291/5604/10718/3845/817/1398/5579
hsa04217	Necroptosis	116	0.465248064237123	1.69233015260257	0.000235568499363014	0.000749742050857285	0.000345723000077298	4501	tags=40%, list=22%, signal=31%	1536/7099/355/7128/148022/114548/3553/834/6773/6776/7098/3459/8878/6778/824/2495/3718/54822/3716/8743/330/7124/7188/2746/6777/8681/6774/823/92421/29108/7132/8737/197259/5601/255189/356/6609/8605/8837/1540/2752/5834/3454/818/3458/55072
hsa04015	Rap1 signaling pathway	196	0.462611995801718	1.78565711761789	1.95274989754369e-06	8.97722522343002e-06	4.13960139099174e-06	3085	tags=32%, list=15%, signal=27%	1436/3689/7057/10000/5156/5159/3684/10411/5154/54518/10451/2357/8817/2252/3937/7409/3683/5880/1956/57568/5909/3688/2149/5587/5293/9732/115/57121/5330/1969/3690/113/284/80310/1946/5155/7424/999/1435/83593/3815/9693/2261/3791/112/3082/2246/56034/1500/2321/4233/1902/3643/2846/3479/5600/22808/3397/23094/1432/5908/5335
hsa05222	Small cell lung cancer	91	0.46145655697466	1.63452967382106	0.00108409194750134	0.00301541541699953	0.00139047618211141	3407	tags=40%, list=17%, signal=33%	2335/10000/595/3909/3914/4616/5925/3912/5728/3918/3910/5743/3688/5293/1282/3908/1287/4790/9618/5915/3675/3911/3685/3673/7157/330/7188/3915/317/6256/4792/7185/1147/3913/51426/5747
hsa04137	Mitophagy - animal	70	0.45695062124421	1.562940461232	0.00810093912108869	0.0186209086741691	0.00858652172922412	5533	tags=50%, list=27%, signal=37%	23710/10370/7942/8408/4077/8878/3725/65018/8678/9101/7157/338382/22808/4286/3091/6667/2309/5601/7316/8887/9927/10241/55626/64786/9451/10133/29110/3845/84749/55288/79065/440738/79735/9958/7030
hsa05131	Shigellosis	215	0.456348115551037	1.77654356156466	8.47647329389118e-07	4.06625023228693e-06	1.8750398590606e-06	4961	tags=43%, list=24%, signal=33%	3678/10000/718/929/7099/3606/27128/5829/3059/1956/114548/3554/3688/3710/5293/2308/3553/834/6352/7100/831/5330/5336/55062/837/4790/8878/23118/81/3725/824/8678/87/7414/9265/7157/3101/55054/10318/7124/1793/7188/9475/5600/2017/3708/823/4792/23048/1432/58484/10163/2932/5335/1147/9844/29108/10392/1729/7132/9267/8945/8737/23291/2309/5747/5601/7323/2475/22863/7316/10095/83660/9564/3611/10241/960/9181/258…
hsa04014	Ras signaling pathway	209	0.454451214408773	1.76437474689065	8.03949853147326e-07	3.91334413811419e-06	1.80453140412326e-06	4590	tags=40%, list=22%, signal=31%	3481/1436/10000/5156/5159/5154/5921/25759/8817/2252/5924/5880/1956/115727/5293/8437/23179/64926/2113/54331/1969/5336/5320/284/80310/1946/5155/7424/4790/5322/1435/83593/3815/5863/2549/2261/22821/3791/8844/3082/2246/56034/2321/5781/5338/4233/4763/3643/3479/2114/8681/2788/22808/7039/55770/6464/9846/9610/7535/5908/5335/1147/283455/3363/10125/26279/5063/5601/255189/356/6655/9462/8605/27/5578/55970/285…
hsa04915	Estrogen signaling pathway	112	0.451192696543433	1.63423528556755	0.000423371811290258	0.00128565201410161	0.00059284319301871	4609	tags=37%, list=22%, signal=29%	4313/10000/2353/90993/3868/25759/4318/25984/1956/3872/3710/5293/115/5330/64764/113/8202/2550/3725/1509/112/10499/1839/3880/3860/3310/7039/3708/6464/2852/3866/6667/2099/3312/6655/1385/5594/5291/5604/3845/8648
hsa04540	Gap junction	77	0.447406747638108	1.55258507688223	0.00613486263922259	0.014608917507789	0.00673650195143715	4972	tags=36%, list=24%, signal=28%	5156/5159/5154/2697/1956/3710/115/5592/5330/113/80310/5155/10746/112/56034/3357/7082/1902/84617/3708/6655/5578/5607/5594/5604/3845/5331/5579
hsa04211	Longevity regulating pathway	81	0.446423474187658	1.56067237088467	0.0043797646404015	0.0110664282135336	0.005102980095285	6693	tags=57%, list=33%, signal=38%	10000/90993/5293/2308/115/64764/113/8408/6648/4790/10645/5564/112/7157/3667/3643/3479/83667/2309/2475/51422/5468/1385/27244/5291/3845/847/79602/9365/3480/5290/111/143686/6198/7249/7248/5565/8660/5295/9586/9776/5562/196883/814/1388/1977
hsa04931	Insulin resistance	98	0.445388633201361	1.59773797731396	0.00172611976064522	0.00468316098994729	0.00215951134852077	6473	tags=59%, list=32%, signal=41%	10000/90993/5728/9945/5293/2308/64764/9021/4790/22877/6196/5170/6195/5564/133522/5781/7124/3667/3643/6720/6774/4792/2932/9882/7132/32/5465/5601/2475/376497/1374/51422/79660/8473/5792/183/200186/5834/1385/3551/5770/5291/6945/5579/5507/3569/948/5290/6198/2673/28965/5565/8660/5599/5295/9586/5562/6513
hsa05165	Human papillomavirus infection	304	0.444906243125767	1.78179840276234	1.64107319543721e-08	1.35798806922429e-07	6.26198982469463e-08	4658	tags=40%, list=23%, signal=31%	7476/1277/2335/1293/7058/1292/1291/1278/22801/3381/3696/3678/7057/10000/595/5159/3909/7474/90993/8321/3371/3914/7450/5829/355/6696/5925/3912/5728/3918/3910/1956/1387/3676/148022/5743/3688/5293/2308/131873/1311/1282/10312/3908/64764/3690/1452/5734/6773/1287/4790/894/7098/3695/7483/7472/3133/4851/3675/3911/182/5934/535/3691/324/3685/7148/4853/3673/8515/8324/3107/3716/7157/3693/3672/2033/55534/7124/…
hsa04920	Adipocytokine signaling pathway	63	0.444262792852227	1.497632295647	0.0166334692423765	0.0352928097386322	0.0162743120117719	6473	tags=54%, list=32%, signal=37%	10000/7133/9021/2180/4790/10645/5564/5781/7124/3667/3953/6256/6774/4792/1147/7132/32/5465/5601/2475/1374/51422/2181/3551/4793/79602/948/6257/2182/5565/8660/5599/5562/6513
hsa05169	Epstein-Barr virus infection	184	0.440635828273063	1.69107499770316	1.69272528678383e-05	7.09230468260059e-05	3.27042193982219e-05	4630	tags=41%, list=23%, signal=32%	3117/3118/10000/595/3122/3113/3119/3383/7097/4616/355/3123/5925/7128/3111/3683/3115/29760/864/9612/5293/3127/695/916/3108/5336/567/6773/3109/915/4790/894/23118/956/3133/3725/3718/953/7431/3107/3627/3716/7157/3665/958/7124/7188/317/5600/6774/2923/4792/1432/4067/3106/1147/8737/51426/3134/5601/377841/960/51135/919/1026/4734/3454/3551/5291/29110/4793/917/6892/4939/4193
hsa05166	Human T-cell leukemia virus 1 infection	213	0.43996614101155	1.71376115053474	1.14135138582915e-05	4.94754985573674e-05	2.2814270284046e-05	2646	tags=31%, list=13%, signal=28%	1958/7538/3689/3117/3118/1959/10000/2353/595/3122/3113/3119/90993/3383/920/7040/3123/5925/3111/3683/5728/7048/7042/3560/1387/3115/6688/3554/5530/5293/8829/3127/4773/115/7043/2113/916/3108/64764/113/567/6776/3109/915/4790/894/3561/4772/3133/3725/3600/112/3559/3718/2005/3107/3716/7157/8850/821/2033/4088/4055/958/7124/2114/6777
hsa05231	Choline metabolism in cancer	89	0.438347873422299	1.55137500523284	0.00567432507190096	0.0136604937697782	0.00629916233619922	4590	tags=40%, list=22%, signal=32%	10000/5156/2353/5159/5154/5880/1956/5293/7454/80310/5155/5170/3725/23396/56034/5338/1606/1609/6581/8681/3091/10163/5335/8394/6667/57153/5601/255189/2475/6655/8605/5578/5594/5291/5604/3845
hsa04066	HIF-1 signaling pathway	102	0.435894290860124	1.56650079369725	0.0044521855027963	0.0110802511385382	0.00510935415833371	5226	tags=43%, list=25%, signal=32%	5054/1536/10000/7099/3162/1956/1387/5293/112399/2064/5336/284/4790/405/3459/230/2321/3101/2033/4055/3643/7076/3479/3091/6774/5335/2475/5209/54583/5578/1026/285/5594/818/3458/5291/5604/8569/817/7010/5579/3569/3480/5290
hsa04390	Hippo signaling pathway	146	0.430953271689064	1.61992614502419	0.000419121955864897	0.0012845311795489	0.00059232635088119	3619	tags=30%, list=18%, signal=25%	7476/5054/6591/3689/595/7474/8321/7040/374/652/122786/7048/7042/85409/7003/658/26524/7043/9231/999/894/1495/7483/7472/1742/324/7159/2246/8324/7005/4088/330/9113/8325/3397/2932/8323/8945/650/23291/4086/3398/23286/92597
hsa05171	Coronavirus disease - COVID-19	199	0.430182672639887	1.65970981384448	6.79265323787996e-05	0.00025262564289194	0.000116491392015682	5035	tags=38%, list=25%, signal=29%	2162/1536/719/2353/718/2212/7099/713/716/7097/714/51284/728/7450/712/1675/715/51311/1956/114548/720/5293/3553/834/8829/3572/5336/6773/4790/7098/3592/6868/23118/6347/3725/1839/3627/185/3716/6403/7124/717/5600/6774/4792/1432/5335/4312/1147/7132/6124/5601/629/730/721/51135/6128/6206/5578/10747/5594/3454/51065/3551/6147/5291/9349/29110/4793/4939/9641/3576/6885/5579/6164
hsa05163	Human cytomegalovirus infection	203	0.427372432112868	1.65415402810141	3.54999423569958e-05	0.000139886677621019	6.45049077915337e-05	4972	tags=44%, list=24%, signal=34%	10000/5156/595/6387/6351/90993/3587/388372/5829/355/5925/1234/5880/1956/3554/6348/5743/5732/1230/3710/5530/5293/3553/6352/4773/115/5330/54331/11214/414062/64764/3690/113/567/5733/5734/4790/4772/3133/6347/3685/112/6376/3107/3716/7157/7124/7188/9475/2788/5600/3579/6774/2923/3708/23365/2768/4792/1432/2932/3106/1147/6667/7132/8737/3134/5747/2475/356/6655/9564/5578/55970/1385/1026/5594/3551/5291/5604/…
hsa05161	Hepatitis B	148	0.42565297781176	1.59742653802722	0.00067197701205217	0.00195109114902867	0.000899692213735592	5226	tags=43%, list=25%, signal=32%	1959/10000/2353/1960/7099/3339/90993/7040/7097/355/5925/7048/7042/4318/1387/148022/5293/4773/7043/64764/6773/6776/4790/7098/23118/4772/3725/6778/3718/3716/7157/2033/4088/3665/7124/6777/317/5600/6774/4792/1432/1147/5601/356/6655/51135/5578/1385/1026/5594/3454/4214/3551/5291/5604/29110/3845/9641/3576/6885/5579/3569/537/5290
hsa04921	Oxytocin signaling pathway	136	0.425183053875209	1.58339386882965	0.00150916834578045	0.00412838613597792	0.0019036921282137	6873	tags=53%, list=33%, signal=35%	2353/595/5997/1956/23533/4208/5743/3710/5530/4773/115/7226/5330/113/5294/4772/146850/10645/3725/1938/786/5564/112/4660/27092/4638/782/1827/781/8681/3768/9475/775/3708/255189/5020/8605/51422/5578/784/5607/1026/5594/93589/818/783/5604/4881/3845/5532/817/5331/5579/4659/111/3762/776/55799/5565/54776/100137049/3709/5562/196883/4775/60/814/6262/340156/6714/6261/163688
hsa05200	Pathways in cancer	485	0.423850690543124	1.73591617440957	1.13077423694215e-10	1.20737507234791e-09	5.5674792650802e-10	3407	tags=32%, list=17%, signal=28%	7476/2335/3481/1436/4313/10000/5156/2353/595/5159/6387/1909/3909/3575/7474/8321/3566/5154/7040/1439/3914/4616/355/1438/5925/8817/861/2252/3162/3912/10161/5728/652/7048/7042/3918/5880/4318/3560/3910/1956/1387/6688/115727/624/5743/5732/3688/2149/2737/5293/2308/1441/3572/112399/115/57121/7043/5330/2113/54331/2064/1282/3908/5336/113/5733/5734/5155/7424/6773/6776/2034/999/1287/4790/8202/894/405/9618/3…
hsa04070	Phosphatidylinositol signaling system	89	0.423048781899211	1.49722936057307	0.00996791170202938	0.0219958584891448	0.0101427873459246	5001	tags=45%, list=24%, signal=34%	5728/3635/3710/5293/5330/5336/9677/117283/22876/80271/8821/23396/1606/1609/5287/3707/8897/3708/200576/1040/5286/5335/8394/5297/9107/253430/5298/8867/8396/5578/55361/5291/3636/113026/8871/3631/5331/23262/5579/5305
hsa04144	Endocytosis	239	0.419998637301823	1.64461813373612	2.67442390510766e-05	0.000109288186739585	5.0395252272984e-05	5284	tags=42%, list=26%, signal=32%	5156/1601/2350/27128/11031/1234/7048/7456/3560/1956/30846/55616/8853/3482/9922/868/80223/50807/9815/3561/11021/3949/116984/3133/51028/2261/10565/3559/23396/9101/3107/9265/11059/5338/3799/4088/79720/116985/23624/161/8729/26119/22905/3310/6642/57154/3579/414189/30844/116987/9135/92421/6643/8394/3106/64750/10564/5867/9267/408/3134/55040/10254/3312/83737/7251/10095/26056/858/116986/2060/26286/118813/…
hsa04371	Apelin signaling pathway	129	0.419349458455024	1.54148024707803	0.00306094412338818	0.00785405042512782	0.00362168011335199	2841	tags=25%, list=14%, signal=22%	1958/5054/10000/595/10365/6696/59/23533/4208/8877/3710/187/115/5330/4209/54331/113/5294/999/6548/146850/182/5564/8678/112/185/4088/4638/4205/2788/22808/3708
hsa05160	Hepatitis C	136	0.417370494292398	1.55429967321075	0.00235448695768388	0.00614798997755714	0.00283497709252913	4774	tags=39%, list=23%, signal=30%	10686/10000/595/355/5925/1956/148022/6041/5293/9021/1366/6773/4790/7098/3949/3627/3716/7157/5010/7122/3665/7124/9074/8554/317/6256/6774/4792/1364/2932/1147/7132/8737/5465/356/6655/8837/440275/1026/5594/3454/949/3646/3551/3458/5291/9451/5604/29110/3845/4939/100506658/9641
hsa05220	Chronic myeloid leukemia	76	0.411956075631063	1.42922949539622	0.0210852675806423	0.0430950842052115	0.019872117060759	5011	tags=43%, list=24%, signal=33%	10000/595/7040/4616/25759/5925/861/7048/7042/5293/7043/6776/4790/7157/5781/4088/6777/6464/4792/9846/1147/51426/6655/1026/5594/3551/5291/5604/613/3845/4193/1398/1647
hsa04270	Vascular smooth muscle contraction	116	0.411584629002874	1.49713052358731	0.0056953116019015	0.0136604937697782	0.00629916233619922	6453	tags=51%, list=31%, signal=35%	1909/59/72/4629/3710/115/147/5592/5330/79784/5320/113/800/5583/5322/10203/112/3779/4660/185/4638/8681/9475/775/552/3708/23365/2768/133/4628/10268/4627/26279/255189/10267/5739/8605/5578/183/5594/79924/5604/4881/553/5331/5579/4659/1906/111/9826/9138/10672/776/8398/54776/100137049/3709/3778/196883
hsa04360	Axon guidance	172	0.410228159691066	1.56661090160214	0.000502578928079917	0.00148530022495047	0.000684905494093872	4831	tags=38%, list=24%, signal=30%	6387/7474/3897/5921/3985/5880/6586/658/3688/5530/5293/8829/223117/4773/1969/5336/8482/1946/219699/10154/2043/6091/10501/22885/54434/59277/5170/90249/85464/57556/5781/4233/2048/10512/9475/2042/91653/23365/64101/2932/5335/64218/5361/5063/56920/5747/6092/64221/3611/55740/659/57522/5365/5578/4756/5594/818/5364/5291/23654/3845/5532/56288/817/9901/3984
hsa01522	Endocrine resistance	93	0.409483211285796	1.45521047516709	0.0210918539010401	0.0430950842052115	0.019872117060759	5764	tags=53%, list=28%, signal=38%	4313/10000/2353/595/25759/5925/4318/1956/5293/115/2064/113/5469/8202/4851/3725/182/112/4853/1839/7157/3479/9611/5600/6464/1432/2852/6667/2099/5747/5601/2475/6655/4854/1026/5594/5291/5604/3845/4193/54567/1565/3714/3480/5290/111/1871/638/6198
hsa04310	Wnt signaling pathway	153	0.406024390899289	1.53254672133085	0.00214547750624197	0.00572704076262978	0.0026408678981756	3461	tags=29%, list=17%, signal=24%	6424/7476/5176/595/6423/7474/8321/7089/85409/5880/7091/144165/1387/7090/5530/4773/5330/1452/894/4772/7483/7472/3725/324/27123/23002/8324/7157/51701/2033/23500/4088/22943/9475/8325/6422/4920/4040/2932/5663/8323/8945/23291/5601
hsa04210	Apoptosis	132	0.403100948744135	1.49247789143543	0.00443178766700968	0.0110802511385382	0.00510935415833371	3555	tags=31%, list=17%, signal=26%	1513/10000/2353/1520/1439/4616/355/4217/4170/3710/1519/5293/5551/143/4790/4000/5170/3725/824/1509/1521/7157/597/8743/330/7124/1522/3002/5783/317/3708/823/4792/7185/1147/7132/8737/5601/56616/356/2081
hsa05132	Salmonella infection	244	0.401401420055332	1.57418049203023	6.50994284535584e-05	0.000244862622933271	0.000112911688107248	4545	tags=34%, list=22%, signal=27%	10000/2353/113146/929/7099/5788/3606/79026/7097/27128/3071/23643/302/114548/51429/5293/3553/834/7100/5294/837/4790/23118/9842/2317/3725/388/10333/23191/57381/4074/23339/2318/9265/338382/3799/257364/8743/330/7124/5287/84617/6281/57617/9475/5600/79443/55770/1783/4792/10006/1432/58484/5286/51164/1147/9844/29108/5420/10392/7132/9267/112574/8737/5063/399/197259/3839/5601/83547/27072/10095/4646/391/511…
hsa05170	Human immunodeficiency virus 1 infection	189	0.399388698645482	1.53323645708616	0.000797882757702445	0.00227671717930611	0.00104984573381901	4972	tags=38%, list=24%, signal=29%	10000/2353/7099/920/7097/5829/355/7133/1234/3985/5880/140564/3710/5530/5293/4773/54331/916/5336/567/915/4790/23118/4772/3133/3725/3107/7124/7188/60489/2788/5600/2923/3708/4792/1432/164/27350/5335/3106/1147/7132/8945/8737/3134/23291/5063/5747/5601/2475/356/164668/85363/51135/5578/919/55970/162/5594/3551/5291/5604/29110/3845/917/6892/2791/5532/3984/1398/6885/5579
hsa04020	Calcium signaling pathway	206	0.398563368038383	1.54688228446516	0.000686351138109805	0.001975497623603	0.000910946590626286	5168	tags=38%, list=25%, signal=29%	5724/5156/5159/5136/1909/53373/5027/5154/5350/8817/2252/2769/1956/8912/624/8877/3710/2149/5530/115/147/5330/2064/5336/2065/113/80310/3269/5733/5155/7424/3274/444/80271/489/2261/3791/3082/2246/56034/185/3357/2321/4233/4638/5025/2668/3707/775/552/3708/5153/5335/219931/3363/488/2066/2774/7134/10800/5737/6786/5578/8913/6915/493/818/57192/490/5024/113026/5532/553/817/5331/5579/9630/623/84876
hsa05226	Gastric cancer	132	0.395206899176235	1.46325023893128	0.0064970322019215	0.0152518982896171	0.00703299491809345	4590	tags=36%, list=22%, signal=28%	7476/10000/595/7474/8321/7040/4616/25759/5925/8817/2252/7048/7042/1956/5293/7043/2064/1452/999/5915/1495/7483/7472/2549/324/3082/2246/8324/7157/4233/4088/8325/6256/6464/4040/2932/8323/51426/2475/6655/3728/5243/1026/5594/89780/5291/5604/3845
hsa04550	Signaling pathways regulating pluripotency of stem cells	128	0.390574470148941	1.43622528519484	0.00865231146117894	0.019693182048433	0.00908097121012177	6646	tags=49%, list=32%, signal=33%	7476/3976/10000/3624/7474/8321/652/658/5293/3572/9314/7483/7472/324/2261/5460/3718/8324/3716/4088/7994/3479/8325/5600/6774/3397/1432/2932/8323/4086/3398/3720/5978/3399/659/6926/5594/89780/5291/657/56916/5604/3845/463/92/3480/5290/4087/4090/80326/54361/5462/3625/1856/90/7477/83729/51384/6498/5295/84333/4093/1499
hsa05224	Breast cancer	136	0.388846648012767	1.4480760528125	0.0112248772409952	0.0242838847501269	0.0111978479528332	5641	tags=43%, list=27%, signal=32%	7476/10000/2353/595/7474/8321/4616/25759/5925/8817/2252/5728/1956/5293/2064/1452/8202/7483/7472/3815/4851/3725/182/324/4853/2246/8324/7157/3479/8325/6464/4040/2932/8323/6667/2099/51426/2475/6655/4854/1026/5594/89780/5291/5604/3845/8648/26508/54567/1647/3714/3480/10023/5290/4791/80326/54361/2324/1871
hsa04530	Tight junction	154	0.386379591737804	1.45977940977697	0.00783757510688761	0.0181415200026559	0.00836546478099892	7075	tags=49%, list=34%, signal=32%	10686/595/57530/79778/4217/3059/861/4629/83700/3688/7454/1080/79784/2064/11346/1366/913/909/58494/81/3725/5564/9693/87/51762/27134/5010/7122/7082/911/84952/9074/9475/2017/1364/4628/910/4627/5601/10095/51422/9181/7408/7430/4734/123720/4214/51421/100506658/56288/10096/5584/24146/4771/776/10097/9080/912/10094/998/5565/5599/11149/3308/2626/5562/60/79861/5521/6714/23370/8189/10109/153562/3993
hsa04022	cGMP-PKG signaling pathway	146	0.382725865746357	1.43864237036555	0.00868641866788889	0.019693182048433	0.00908097121012177	2897	tags=25%, list=14%, signal=22%	10000/1909/90993/5350/5997/140/23533/4208/624/3710/5530/4773/115/147/5592/5330/4209/64764/113/5294/4772/146850/2969/489/112/3779/185/9569/4638/4205/3667/3643/150/9475/775/3708/2768
hsa05020	Prion disease	232	-0.27055019258628	-1.32454619738576	0.00643041498971231	0.0152033382971055	0.00701060280833297	3498	tags=31%, list=17%, signal=26%	2903/10105/4709/9377/113457/203068/5693/7419/5690/5685/1537/4716/27089/292/84701/4710/347733/291/5688/2534/440567/10975/5296/6647/4706/126328/10376/4708/4714/4700/5702/4711/4717/10213/5708/11047/6392/5686/727/55967/4725/4722/1349/7384/5695/1460/3800/1351/1347/4713/4696/51079/1329/4694/4718/4729/6389/4728/572/7388/10382/4707/293/5683/10383/54539/3798/4726/4702/1339/10488/4712
hsa04723	Retrograde endocannabinoid signaling	119	-0.307134720952112	-1.37024353600517	0.0195723809044078	0.0407450193670377	0.0187884490641452	2520	tags=25%, list=12%, signal=22%	94235/4706/126328/4708/4714/4700/4711/4717/2775/2783/2790/55967/4725/4722/2567/4713/4696/51079/55879/4694/4718/4729/2785/4728/2787/4707/54539/4726/4702/4712
hsa04114	Oocyte meiosis	115	-0.32293277471382	-1.43311425728818	0.00556423106514699	0.0135423564894386	0.00624468656692193	3386	tags=30%, list=16%, signal=26%	27330/9978/7531/29882/441272/808/5519/9126/9134/25906/26271/805/5499/1017/995/51806/9133/246184/898/25847/699/8243/6790/27127/891/9700/4085/9088/5347/51529/10459/983/991/9232/9985
hsa01240	Biosynthesis of cofactors	128	-0.326476337186036	-1.4835817737466	0.00486659139446223	0.0119321611227185	0.00550218910095145	3219	tags=26%, list=16%, signal=22%	221264/55312/29922/79001/1728/51805/4351/441024/6697/7389/4831/5498/349565/5805/133686/249/4522/2356/7390/158067/9104/10797/3145/493911/29968/219/387787/56474/1719/8836/50808/122481/4830
hsa04714	Thermogenesis	191	-0.331528259339242	-1.5841701474756	8.92072373552994e-05	0.000320952125702218	0.00014799827707687	3471	tags=32%, list=17%, signal=27%	4709/9377/27330/1537/4879/65260/4716/27089/493753/84701/2778/4710/51241/7350/440567/10975/4706/126328/4708/4714/4700/388753/4711/4717/6199/3991/6392/28958/55967/4725/6009/4722/1349/7384/6604/2260/91942/1351/1347/4713/4696/51079/1329/4694/656/4718/4729/6389/4728/7388/86/4707/25915/54539/51287/4726/4702/1339/6194/8193/10488/4712
hsa05014	Amyotrophic lateral sclerosis	316	-0.350286256943132	-1.77348539714692	1.04532514362656e-07	6.41216705383488e-07	2.95679511148372e-07	4128	tags=35%, list=20%, signal=29%	2905/2902/836/23636/1767/8701/5691/637/283/55706/4723/9688/1965/23165/4686/2903/4709/9377/113457/203068/1616/5693/9631/5690/5685/1537/56171/2877/4716/79023/23511/2733/27089/596/84701/4710/56000/347733/5688/440567/10975/1768/6647/4706/81929/126328/10376/4708/4714/4700/5702/4711/10120/4717/375189/10213/5708/8480/11047/79902/6392/201625/5686/55967/145957/4725/4722/1349/345456/6506/7384/5695/129401/3…
hsa05016	Huntington disease	262	-0.366350324811834	-1.79299574452865	5.53080575890953e-08	3.73611572693684e-07	1.72280737925216e-07	3472	tags=35%, list=17%, signal=29%	10105/4709/9377/113457/203068/5693/5432/7419/5690/5441/5685/1537/56171/2877/4716/27089/5433/292/84701/4710/5434/55081/7350/347733/6804/291/5688/440567/10975/1768/6647/4706/126328/10376/4708/4714/4700/5702/4711/10120/4717/10213/5708/11047/6392/201625/5686/55967/1173/4725/4722/1349/6506/7384/5436/5695/1175/3800/1351/1347/10671/4713/4696/51079/1329/4694/4718/4729/6389/4728/7388/5438/5437/10382/4707/…
hsa01200	Carbon metabolism	103	-0.377513469643423	-1.62397438232611	0.00101714112511452	0.00285316705434666	0.00131565979608925	4611	tags=38%, list=22%, signal=30%	6472/5315/1373/132158/8802/4191/1737/2023/25796/10873/22934/2539/5230/7167/3421/4190/39/283871/2806/387712/6392/80201/5631/5723/1892/38/84706/6389/414328/3418/9104/2731/29968/5160/48/8277/26227/5634/2645
hsa05012	Parkinson disease	224	-0.380625225320753	-1.88347958974957	7.03582325965055e-08	4.61823636641332e-07	2.12957313763693e-07	3472	tags=36%, list=17%, signal=30%	10105/4709/9377/113457/203068/1616/5693/7419/7314/5690/5685/1537/4716/27089/23516/292/84701/2778/808/4710/4128/347733/291/5688/440567/10975/6647/4706/126328/10376/4708/4714/4700/805/5702/4711/4717/29985/10213/7345/5708/11047/6392/5686/55967/4725/11315/55630/4722/1349/7384/5695/3800/1351/51806/1347/27429/4713/4696/51079/7317/1329/4694/4718/4729/6389/4728/7388/10382/7295/4707/293/5683/10383/4129/54…
hsa00240	Pyrimidine metabolism	55	-0.391017467846016	-1.56216566615122	0.0208358230727746	0.0430950842052115	0.019872117060759	2492	tags=31%, list=12%, signal=27%	30833/4831/115024/83549/1854/51020/1841/7371/6241/79077/56474/8623/4830/7298/318/56953/7083
hsa03040	Spliceosome	137	-0.44138757983185	-2.010614401616	3.03984914251493e-07	1.62288720350394e-06	7.48349958683642e-07	3887	tags=42%, list=19%, signal=35%	10084/10992/11017/6434/57187/10907/26831/55110/26121/8175/9939/84844/6100/101954271/9092/6427/57461/4686/9410/6634/11157/10713/10946/10450/84950/51645/51639/8896/6626/10285/10286/83443/6629/151903/10929/22916/9775/6631/26827/26863/6635/57819/6627/6636/26864/23658/27258/51690/6633/9128/51503/25804/6628/4116/10465/6637/6632/10189
hsa03050	Proteasome	43	-0.448533621220954	-1.67670310145712	0.00669720806115286	0.0156110976636732	0.00719862986558314	5111	tags=44%, list=25%, signal=33%	9861/5701/5698/51371/5720/5691/9491/5693/5690/5685/5688/5721/5702/10213/5708/11047/5686/5695/5683
hsa03008	Ribosome biogenesis in eukaryotes	74	-0.454976950482815	-1.87790827909342	0.000168254935129511	0.000546003760077139	0.000251774670730435	3964	tags=34%, list=19%, signal=27%	55341/10556/26851/10436/84128/51602/56000/55505/1736/55651/29889/6023/345630/3692/10528/10557/55272/1460/55916/54913/29107/10248/65083/10171/138716
hsa00620	Pyruvate metabolism	41	-0.458269515014576	-1.6912917591466	0.00974221805301262	0.0217883390239674	0.0100470954316275	4008	tags=41%, list=20%, signal=33%	4191/501/1737/10873/4190/98/223/39/2739/5106/38/3945/5160/219/97/5105/9380
hsa00052	Galactose metabolism	25	-0.507928605300229	-1.69493832449858	0.0138632033655844	0.0296046471871513	0.0136513717352105	2925	tags=36%, list=14%, signal=31%	2717/8704/92579/80201/130589/2683/231/2645/2592
hsa00190	Oxidative phosphorylation	103	-0.511870587167477	-2.20194718194127	2.56918963675476e-08	1.97767853433913e-07	9.11952257844407e-08	3471	tags=45%, list=17%, signal=37%	4709/9377/1537/4716/27089/84701/4710/440567/10975/4706/126328/4708/4714/4700/496/4711/4717/9550/6392/55967/4725/4722/1349/5464/534/7384/1351/1347/9296/4713/4696/51079/1329/4694/4718/4729/6389/4728/7388/4707/155066/54539/4726/4702/1339/4712
hsa03010	Ribosome	132	-0.525482323773038	-2.375596414288	1e-10	1.14137931034483e-09	5.26315789473684e-10	4981	tags=53%, list=24%, signal=40%	64965/6146/6202/65005/6155/6209/6235/51023/6203/6201/6233/6204/6169/28998/11222/29088/6171/6136/7311/55168/9045/6205/6130/6234/100529097/6231/6141/200916/63931/51264/64983/10573/6159/51081/79590/29074/54948/3921/6165/29093/6167/64968/54460/6230/2197/6227/6173/51121/51073/63875/219927/64963/6193/51116/55052/6223/64981/6191/64928/51373/51021/6170/6123/64960/51069/11224/65003/6182/64979/6194
hsa01040	Biosynthesis of unsaturated fatty acids	22	-0.530520912440963	-1.71125292894441	0.0195552647456715	0.0407450193670377	0.0187884490641452	2745	tags=36%, list=13%, signal=32%	3992/6785/9415/79966/9524/79071/11332/83401
hsa04110	Cell cycle	126	-0.540444510602656	-2.44076953586141	1e-10	1.14137931034483e-09	5.26315789473684e-10	2669	tags=44%, list=13%, signal=39%	1032/701/9126/9134/5933/25906/11200/1874/1017/1870/10912/8900/9184/995/994/9133/23595/246184/898/25847/10926/699/7027/8243/4172/4175/990/890/27127/4174/1031/891/9700/23594/4085/9088/1019/1111/5347/993/51529/4173/10459/5111/4176/8317/983/4998/7272/8318/1869/4171/991/6502/9232/1029
hsa03420	Nucleotide excision repair	45	-0.552875466253843	-2.10304668969796	5.32581145575698e-05	0.000202625700213283	9.34352886974908e-05	1606	tags=42%, list=8%, signal=39%	5985/5887/9978/2067/404672/7507/6119/5424/10714/3978/56655/5982/1069/5427/5983/5111/5425/5984/54107
hsa03460	Fanconi anemia pathway	47	-0.571763080407158	-2.20803906875976	1.87860871087208e-05	7.77274354123324e-05	3.58418767205858e-05	2291	tags=36%, list=11%, signal=32%	55120/5889/2177/2175/2176/6119/5888/83990/641/146956/2187/3280/80010/55215/29089/116028/2189
hsa00790	Folate biosynthesis	21	-0.583547383309832	-1.83935111410285	0.00885079775339024	0.0199293473222596	0.00918987235403927	3361	tags=52%, list=16%, signal=44%	8644/6697/5860/873/5092/5805/249/2356/231/1719/8836
hsa03440	Homologous recombination	37	-0.585236294321698	-2.14701853467877	9.36943540900063e-05	0.000333471303266582	0.000153771152722704	2081	tags=43%, list=10%, signal=39%	5889/29086/25788/6119/5888/83990/5424/641/5932/10714/146956/6742/7517/7516/8438/5425
hsa03410	Base excision repair	33	-0.602413976537651	-2.14379000646033	0.000114874811174342	0.000396078776028201	0.000182640873029382	3247	tags=58%, list=16%, signal=49%	252969/4913/7374/328/7515/10038/55247/23583/5424/10714/27301/3978/4595/56655/2237/5427/5111/5425/54107
hsa03430	Mismatch repair	23	-0.711032932364034	-2.34678782517714	3.52301632757672e-05	0.000139886677621019	6.45049077915337e-05	1606	tags=52%, list=8%, signal=48%	6119/2956/5424/10714/3978/6742/5982/9156/5983/5111/5425/5984
hsa04950	Maturity onset diabetes of the young	12	-0.7418722068177	-2.00068931507699	0.00181016811869442	0.00487126542510451	0.00224625055379282	2562	tags=58%, list=12%, signal=51%	3171/5080/6928/4825/3280/2645/3170
hsa03030	DNA replication	36	-0.857889498832875	-3.10163605912363	1e-10	1.14137931034483e-09	5.26315789473684e-10	1719	tags=75%, list=8%, signal=69%	5558/6119/1763/5424/10714/5557/3978/6742/84153/5422/56655/4172/2237/4175/4174/23649/5982/5427/5983/4173/5111/4176/5425/5984/4171/54107/10535
