# Supplementary material for: Identifying the Role of Oxidative Stress-Related Genes as Prognostic Biomarkers and Predicting the Response of Immunotherapy and Chemotherapy in Ovarian Cancer
Source: Oxid Med Cell Longev. 2022 Dec 12;2022:6575534. doi: 10.1155/2022/6575534 (PMC9764017; doi:10.1155/2022/6575534)
Supplement: Supplementary 16 — Supplement Table 15: signaling pathway analysis in regard to SLC7A11. [file 6575534.f16.txt]

ID	Description	setSize	enrichmentScore	NES	pvalue	p.adjust	qvalues	rank	leading_edge	core_enrichment
hsa03010	Ribosome	132	0.626685669019865	2.81138647527099	1e-10	3.31e-08	2.31578947368421e-08	3945	tags=61%, list=19%, signal=49%	100169760/6201/6223/6227/6193/6155/6222/6205/6217/6235/6165/6152/6183/6141/6142/6203/6176/6204/9349/6232/25873/6202/6206/6143/6158/6160/6210/6133/23521/64960/51264/6167/6208/65003/6209/6233/6175/200916/2197/6147/6171/6154/6194/6144/6218/51069/11224/9553/6181/6128/6231/64963/6157/54948/6123/65005/6137/6139/6135/29074/7311/64981/6228/6168/6230/51187/10573/6125/6187/54460/6170/6124/6161/55173/6169/6…
hsa00330	Arginine and proline metabolism	45	0.55793207997576	2.05617203405851	2.96307200804268e-05	0.000467036587934347	0.000326754807904456	2295	tags=44%, list=11%, signal=40%	1159/2628/548596/26/217/4128/1158/8659/1152/5831/4953/4842/4843/5625/384/112483/6723/224/54498/4129
hsa00980	Metabolism of xenobiotics by cytochrome P450	48	0.4072436815715	1.51610282197729	0.0113561719008731	0.0464060851751727	0.032467288085667	2419	tags=44%, list=12%, signal=39%	2938/2947/126/27294/1565/2939/2941/2944/9446/1645/4257/218/125/2946/374875/2948/8574/653689/7367/2949/3290
hsa00480	Glutathione metabolism	54	0.388267785884972	1.49976475428373	0.0112579447056903	0.0464060851751727	0.032467288085667	2325	tags=35%, list=11%, signal=31%	2938/2947/2882/2939/2941/2686/494143/51060/2944/9446/4257/4953/2946/2948/653689/6723/5226/2949/6241
hsa04723	Retrograde endocannabinoid signaling	119	0.305474689078642	1.33436690460616	0.0106835869870056	0.0459255492558292	0.0321310886827236	2760	tags=32%, list=13%, signal=28%	2786/56901/2556/2791/6300/126328/57030/4711/94235/107/2562/55967/5602/4714/4696/2792/5567/2568/51079/109/4725/54331/4700/4716/4704/2775/2563/747/4712/4710/2785/5582/4697/23236/4695/55879/4707/4708
hsa04080	Neuroactive ligand-receptor interaction	236	0.283484815600888	1.34719313963799	0.0012982627266911	0.0102315467270179	0.00715834084892334	2184	tags=22%, list=11%, signal=20%	4852/283869/5443/5179/1907/23620/151/1908/183/7200/2905/85569/2556/3362/1394/4828/53637/57152/51083/4987/2906/624/5618/887/5023/6344/5745/10316/146/4923/2740/2562/136/5025/7349/2862/2894/554/2900/7253/1136/2568/185/5646/4886/154/3640/1816/1141/1140/5020/2563
hsa05165	Human papillomavirus infection	304	-0.362560069634318	-1.34334041402858	0.0052789004946414	0.0268817855957893	0.0188074187663337	4763	tags=35%, list=23%, signal=27%	3695/8772/9368/836/1026/64764/7187/1291/3716/5894/10474/1293/6696/324/3655/7248/3913/3516/207/5743/890/9794/5610/3133/1452/9223/3694/7450/3381/9636/56288/5594/3134/1277/7058/5970/3845/131873/6655/10134/4799/3107/1741/6773/3106/10000/3455/80326/8325/537/6932/9641/5519/7337/7132/23352/894/1278/2033/3696/6654/8313/54626/3685/5934/355/8638/8503/3915/148022/3454/3909/51606/7157/7422/3679/7124/6772/103…
hsa04010	MAPK signaling pathway	275	-0.363099433961226	-1.3373905710052	0.00915811595652068	0.0404178184214446	0.02827769137452	3228	tags=27%, list=16%, signal=23%	5594/2246/5921/3304/5970/468/3845/6655/10746/5606/7048/7186/774/1647/10000/3643/7786/3164/3654/5579/5058/773/4772/7132/2324/3556/5321/786/1849/7424/285/6654/6788/5155/10125/355/6197/7189/1946/2321/5971/5530/4791/4615/7157/3554/7422/2317/7124/2316/9693/56034/1846/9064/5578/27092/1969/5801/1435/55799/4790/2066/7042/11221/3553/3305/8817/2353/1848/4609/777/3303/374
hsa05132	Salmonella infection	244	-0.373770634476169	-1.36822578355441	0.00750517884674275	0.0357569395583685	0.0250167807372908	5629	tags=39%, list=27%, signal=28%	329/10383/387/29895/3551/929/127829/5788/1499/3265/9267/840/10006/10333/10109/4792/257397/10092/10096/8772/836/64746/653857/51143/6990/1785/55845/8976/3326/5894/26999/9648/10810/81873/140735/338382/23339/207/23265/5869/51429/10787/3799/8737/1778/382/5594/79659/197259/5970/330/4636/5606/64837/7186/55823/10000/8767/57617/9844/3654/6932/5058/55207/7132/3576/83657/837/5287/1783/5868/302/7189/834/5286…
hsa04144	Endocytosis	239	-0.392644990546803	-1.43650928936053	0.00281498373482594	0.0182697963966154	0.0127821758856906	5770	tags=38%, list=28%, signal=28%	9146/55737/1234/51100/387/9525/3105/9101/80223/25978/10938/3265/116987/9267/8729/10109/1759/57154/10092/118813/2060/84440/10096/273/55680/30845/9798/653857/4087/1785/8976/9922/254122/3312/23396/7251/119016/378/81873/2352/80230/414189/58513/3559/5869/3133/3799/112936/56288/23550/382/3134/867/3304/30011/377/1213/7048/116988/868/22841/64145/3107/3106/30844/4218/26052/10564/5371/64411/23096/10015/356…
hsa05163	Human cytomegalovirus infection	203	-0.402525774797824	-1.45730181268858	0.00184265628969399	0.0132591137367111	0.00927653052019857	5578	tags=44%, list=27%, signal=32%	387/113/3551/595/3105/5295/1499/3265/1385/9826/2782/4792/2923/8772/836/1026/64764/3716/5894/4776/4775/5880/414062/7248/1388/111/207/6667/5743/6348/6093/3133/5331/8737/2771/2776/5594/3134/2185/5970/468/3845/6655/3708/1871/388372/7186/3107/3106/10000/3710/567/5579/5332/4772/7132/11214/6351/3576/51806/6654/1230/6774/3709/3685/355/8503/5733/5530/7157/3554/7422/6352/7124/23365/5578/6890/6892/3135/4790…
hsa05168	Herpes simplex virus 1 infection	462	-0.406121824150221	-1.53172986250775	4.12966349690971e-06	0.000136691861747711	9.56343125600144e-05	6613	tags=41%, list=32%, signal=28%	155061/7551/7554/6041/10794/54811/374928/10454/5293/10172/5290/152687/440515/90233/147686/162962/5451/285676/10379/3456/6940/57541/100529215/7757/163050/84527/7694/121274/100129842/57693/7700/7592/329/5781/390980/3551/284307/100131827/4049/7711/3105/5295/125919/353088/162963/284390/284306/79230/80032/285267/4792/2923/7644/162993/10482/8772/29992/836/146540/162972/7187/6426/3716/3717/598/84874/572…
hsa05170	Human immunodeficiency virus 1 infection	189	-0.408001570330083	-1.47386989538264	0.00501163640960643	0.0259195570559333	0.0181342106926549	4878	tags=38%, list=24%, signal=29%	2782/4792/2923/8772/836/1642/598/130340/5894/4776/3984/4775/5880/162/207/3133/140564/915/23291/8737/2771/2776/164/5594/3134/2185/5970/3845/8450/5606/3708/200316/7186/8065/3107/3106/10000/3710/567/3654/5579/5058/7465/4772/7132/916/920/60489/10053/51806/85363/3709/355/8503/7189/5530/4615/7124/27350/5578/6890/6892/3135/4790/6891/841/5747/2353/684/3985/7852
hsa05131	Shigellosis	215	-0.412339452061567	-1.50118288408125	0.000737056373020214	0.0065936664721538	0.00461315510851912	5586	tags=40%, list=27%, signal=29%	8454/81631/387/29895/3551/929/5295/9267/472/10109/55072/4792/257397/10092/10096/84812/653857/10892/8976/598/55054/8915/81873/7416/5581/57521/207/10616/6093/3099/5331/3098/5333/23291/8737/54874/7323/7316/382/5594/92610/643246/5970/4636/831/3708/7186/10000/5481/3710/8767/83660/9844/8878/7414/5332/7132/5580/823/23048/3576/837/3709/7094/1729/8503/7189/87/4303/834/4615/7157/3554/9181/3606/6352/7124/81…
hsa05202	Transcriptional misregulation in cancer	156	-0.416134593266345	-1.47814092577701	0.00317500750151052	0.0198288204339619	0.0138729225488047	5155	tags=42%, list=25%, signal=32%	4318/9611/472/3684/3728/51274/3695/1436/1026/598/8864/7403/1025/7185/1649/7030/6667/890/2005/5087/1655/862/5970/330/4299/221037/7048/2130/2120/1647/51804/2119/6258/64332/5371/4297/26471/894/3576/8148/55589/6760/1643/2321/7157/2530/6692/4211/604/8938/3560/3248/4790/3002/5328/51513/5747/7102/1848/4609/5327/4086/2118/7490/7849/8900
hsa05130	Pathogenic Escherichia coli infection	184	-0.416666482184018	-1.5043349008774	0.00139741662812134	0.010512384179731	0.00735482435853337	5658	tags=43%, list=28%, signal=32%	10802/64005/5781/10383/387/3551/2212/9267/840/9826/10006/10109/4792/257397/10092/10096/8772/9368/836/2149/653857/55845/8976/26999/4644/10810/81873/1365/4642/2534/4641/1366/6093/10787/8737/9632/4643/382/5594/5970/1364/4645/25/7186/7082/3654/5058/100506658/7132/55971/3576/9871/837/355/7189/834/4615/23191/3554/10458/9181/4691/3606/7124/9076/10427/23365/8797/7277/4790/55930/2017/4627/4651/3553/841/19…
hsa04060	Cytokine-cytokine receptor interaction	236	-0.417925474855198	-1.52611781555392	0.000163454021814133	0.00180344270734926	0.00126175034382839	4933	tags=40%, list=24%, signal=31%	3594/51561/282616/55540/1436/51330/11009/93/23765/2833/5008/6846/58191/414062/55504/1441/83729/6348/3559/3552/9966/4055/2919/1236/6357/10913/6362/3572/2662/7048/388372/2920/8741/3460/4283/132014/6370/3455/8808/3624/7132/3556/6355/920/6351/3586/3576/3561/659/90/51554/1230/9518/355/8784/1237/6356/3454/27242/9180/10673/84818/3554/3566/3625/3563/3557/3568/3606/6352/7124/9573/655/3597/3575/3560/3601/8…
hsa05167	Kaposi sarcoma-associated herpesvirus infection	177	-0.419222923864714	-1.50602444461692	0.00138977211589275	0.010512384179731	0.00735482435853337	5579	tags=44%, list=27%, signal=32%	81631/3551/595/3105/5295/1499/3265/1385/2782/4792/8772/836/1026/7187/3716/3717/5894/4776/7538/4775/207/5743/4277/5610/3133/2919/7316/5594/3134/643246/5970/3845/3572/3708/1871/7186/2920/3107/6773/3106/10000/3455/3710/3091/6932/9641/4772/7132/4067/3383/3576/2033/285/51806/1230/5155/6774/3709/9976/355/8503/1237/148022/3454/5530/7157/7422/6772/3135/6850/4790/3665/7098/841/2353/4609/718/51176
hsa05205	Proteoglycans in cancer	191	-0.419393749245916	-1.51592142207765	0.00120341400579412	0.00975624697975546	0.00682580485147464	3262	tags=31%, list=16%, signal=26%	1655/5594/867/29102/1277/3845/6655/3708/7074/10000/3710/80326/3091/8325/5579/7409/5058/7410/4313/817/1278/288/2549/6654/6774/3709/3685/355/8503/7157/7422/2317/7124/2316/7976/7472/4478/23365/3693/5578/1839/287/8826/3673/2066/10855/7042/2017/5328/8322/5747/7855/406903/2099/8323/3690/4609/11211/7476
hsa04630	JAK-STAT signaling pathway	130	-0.420867138391754	-1.4608095730755	0.00820331085986291	0.037195834172803	0.0260234807378492	6476	tags=50%, list=32%, signal=34%	5293/5290/1438/1439/1489/10379/3456/2057/2885/1387/5781/595/1950/5295/6778/3265/3574/5771/3594/51561/282616/1026/11009/3716/3717/598/5894/5008/1441/9063/207/3559/3572/6655/4170/3460/6773/10000/3455/3718/894/3586/2033/3561/6654/5155/6774/8503/3454/9180/3566/3563/3568/6772/3597/9021/3575/3560/3601/3600/2273/4609/53832/3570/3976
hsa04390	Hippo signaling pathway	146	-0.425212920154453	-1.49727694786413	0.00333596136234783	0.0200764220170387	0.0140461531046224	3571	tags=32%, list=17%, signal=27%	1742/1453/23291/56288/2246/330/7048/1495/7003/7533/1741/10413/80326/4092/4771/8325/6932/5519/9231/3689/894/659/8313/6788/1496/655/7976/7472/7534/286204/7042/23286/154796/8322/999/92597/7855/23513/8323/4609/4086/11211/658/51176/7476/5521/374
hsa04514	Cell adhesion molecules	132	-0.427670472271525	-1.48634181856173	0.00308963279821341	0.0196667010809354	0.0137594982916387	4998	tags=45%, list=24%, signal=35%	3680/54413/3684/947/2734/1462/3695/29126/3655/23705/152404/1365/7412/1366/9672/3133/3115/6614/6404/3683/3134/1364/3107/3106/50848/914/3112/3117/100506658/3689/920/57555/3119/3383/5792/3696/3109/4756/3685/3108/57689/3123/4897/3113/3122/79679/9076/6402/3111/3135/22854/57863/3127/4684/214/999/64101/1000/9071/10686
hsa05166	Human T-cell leukemia virus 1 infection	213	-0.438235371481593	-1.59391893054827	7.66448983193252e-05	0.000980540275228302	0.000686019591509704	5559	tags=45%, list=27%, signal=33%	113/3551/4049/595/10524/4085/3105/5295/3265/472/2113/1385/4792/4214/1026/64764/4087/3716/598/4776/7538/4775/7416/1388/111/207/890/2005/3559/3133/915/821/8295/3115/4055/10393/3683/5594/3134/5970/468/3845/1871/7048/3107/3106/10000/3718/64682/567/83660/3112/331/6513/3117/4772/7132/3689/916/920/894/3119/3383/2033/3561/3109/7094/3108/8503/5971/3123/5530/4791/7157/3554/3113/1959/3122/7124/3111/3135/356…
hsa04670	Leukocyte transendothelial migration	103	-0.445804699164817	-1.51170462873887	0.00415404808073405	0.0236239803346017	0.0165281465212669	4109	tags=36%, list=20%, signal=29%	5880/1365/7412/1366/6093/2771/3683/2185/4636/1364/1536/1495/50848/5579/7409/100506658/7414/7410/83593/4313/3689/3383/1535/8503/87/1500/1496/9076/4478/5578/7070/5747/7294/10411/7852/9071/10686
hsa05235	PD-L1 expression and PD-1 checkpoint pathway in cancer	88	-0.446720832642204	-1.48688190723603	0.00756189054104471	0.0357569395583685	0.0250167807372908	6520	tags=48%, list=32%, signal=33%	10538/5293/5290/5532/6198/116071/5781/3551/1950/5295/3265/4792/1457/3716/283106/3717/5894/29126/4775/207/1459/915/5594/5970/3845/5606/3460/10000/3091/4772/916/920/6774/10125/8503/7189/148022/5530/4615/6772/4790/2353
hsa04613	Neutrophil extracellular trap formation	102	-0.449703238502947	-1.51991863450089	0.0045787810107086	0.0252596085757424	0.0176724881115069	6476	tags=55%, list=32%, signal=38%	60/55869/5595/1432/6403/2475/566/820/5293/5290/2214/728/4688/2209/177/79885/653361/2212/5295/1379/9759/3684/64581/5894/2359/5880/7416/207/10533/7450/5331/2811/6404/3683/5594/5970/1536/10000/5579/5332/3689/837/1535/10105/8503/834/51564/1182/9734/5578/6850/4790/79792/3690/718/366
hsa04933	AGE-RAGE signaling pathway in diabetic complications	99	-0.452665980587364	-1.5269631842577	0.00496521688041625	0.0259195570559333	0.0181342106926549	5491	tags=46%, list=27%, signal=34%	7056/5054/595/5295/3265/836/84812/4087/3717/4846/5581/207/7412/3552/5331/5333/1281/5594/50507/1277/5970/3845/1536/7048/10000/5579/5332/4772/4313/5580/1278/3383/3576/7424/6774/1729/8503/7422/7124/6772/5578/4790/7042/3553/113026/1958
hsa04012	ErbB signaling pathway	82	-0.453568886351999	-1.495242377991	0.0068795735553301	0.0339871469673771	0.0237785731684622	6476	tags=50%, list=32%, signal=34%	5293/3084/5290/5609/2065/2885/673/2002/6198/27/2069/1950/5295/816/3265/1026/5894/145957/207/6464/5594/867/3845/6655/25/868/10000/5579/5058/817/2549/6654/10718/8503/5578/1839/2066/5747/4609/685/374
hsa05133	Pertussis	72	-0.455951980027113	-1.48071990313444	0.0117016545975177	0.0472347277046141	0.0330470348068535	3362	tags=43%, list=16%, signal=36%	387/929/716/840/51561/3684/715/836/3552/2771/5594/5970/720/3654/3689/3586/3576/51806/7189/148022/834/4615/7124/721/4790/710/3659/3553/2353/717/718
hsa04210	Apoptosis	132	-0.460118168434498	-1.59911174505876	0.000484999043945479	0.0045867052441701	0.0032090162306167	5629	tags=52%, list=27%, signal=38%	5293/1520/5290/1439/51807/4001/55367/8743/329/3551/1509/5295/3265/472/840/5170/4792/8772/836/598/5894/835/1508/63970/7185/1649/207/1521/8739/8737/5594/5970/330/468/3845/3708/4170/7186/1647/10000/3710/331/7132/143/1513/823/5551/839/3709/355/8503/8837/153090/7157/3563/10039/6709/7124/8797/7277/4790/3002/4000/9131/841/824/843/2353/1519
hsa04070	Phosphatidylinositol signaling system	89	-0.460691282409132	-1.53716601483215	0.00345243103315157	0.0204063334280923	0.0142769704378448	4342	tags=48%, list=21%, signal=38%	64768/253430/3628/5293/5290/3705/1606/9677/5295/1609/51447/84812/4952/23396/55300/200576/8525/5331/5333/5297/9807/3708/22908/3710/3635/79837/5579/8871/5332/51806/5287/3709/8503/5286/8821/8776/3707/5578/3636/1040/4534/1608/113026
hsa04666	Fc gamma R-mediated phagocytosis	91	-0.461642223642213	-1.54154799417376	0.00395907058810576	0.0229903923625089	0.0160848666552773	6476	tags=54%, list=32%, signal=37%	5293/5290/2214/274/2209/10451/653361/6198/2212/5788/5295/10109/10092/8681/10096/7454/273/653857/1785/5894/3984/23396/10810/5880/81873/5581/207/382/5594/10000/3635/5579/7409/5058/7410/4067/5321/5580/8398/8503/8853/5578/3636/6850/4651/50807/2934/3985/9846
hsa05146	Amoebiasis	90	-0.464003791534609	-1.54918065435265	0.00483627566646341	0.025819471703216	0.0180641875487598	3987	tags=36%, list=19%, signal=29%	3913/338382/5869/5331/1281/2919/2776/1277/5970/2920/5579/7414/5332/3689/5269/1278/3586/3576/8503/5868/3915/87/3909/3554/7124/5578/3911/4790/7042/3553/5747/3918
hsa04662	B cell receptor signaling pathway	78	-0.465147145296881	-1.52015560856613	0.00635431204069084	0.0318678376586162	0.0222958317217223	5545	tags=51%, list=27%, signal=38%	10288/5293/5290/5532/2885/10451/3551/5295/10859/3265/4792/10892/11006/5894/4775/5880/8915/207/5594/5970/3845/6655/10000/3635/5579/7409/4772/7410/4067/6654/8503/5530/84433/3636/6850/4790/975/27071/2353/8519
hsa04650	Natural killer cell mediated cytotoxicity	101	-0.465801461430655	-1.57342630590313	0.00164782307662533	0.0121206541858441	0.0084800251896508	6476	tags=51%, list=32%, signal=35%	5293/5290/2214/5532/3456/2885/673/3937/10451/8743/5781/117157/3105/5295/3265/836/5894/5880/2534/4277/6464/3133/3683/5594/259197/2185/3845/6655/3460/3107/3106/3455/5579/7409/5058/4772/7410/3689/3383/6452/5551/6654/355/8503/3454/5530/7124/5578/3135/8797/6850/3002
hsa04664	Fc epsilon RI signaling pathway	60	-0.476276167552417	-1.49645772647028	0.0096722017264949	0.0421249838351291	0.0294720828231147	6476	tags=53%, list=32%, signal=37%	5293/5290/5609/2885/3937/10451/5295/3265/5170/8681/241/5894/5880/207/2534/5594/3845/6655/5606/10000/3635/7409/7410/4067/5321/6654/8503/7124/240/5578/6850/9846
hsa04061	Viral protein interaction with cytokine and cytokine receptor	90	-0.478860380522329	-1.59878270646805	0.00253179607826587	0.0167604900381201	0.0117262134151261	3739	tags=39%, list=18%, signal=32%	6348/3559/4055/2919/1236/6357/6362/3572/388372/2920/4283/6370/7132/6355/6351/3586/3576/3561/51554/1230/1237/6356/3606/6352/7124/3560/8797/1435/8740/6364/6373/53832/3627/3570/7852
hsa05417	Lipid and atherosclerosis	189	-0.481231904416249	-1.73840805574093	5.16454205897766e-06	0.000144436642323292	0.000101052826557876	6486	tags=52%, list=32%, signal=36%	10454/5293/5290/5609/4973/5532/5451/4688/3456/177/10451/653361/8743/387/3551/929/5295/816/3265/4318/840/5170/10333/4792/836/7187/3717/598/4780/3326/4846/3312/4775/414062/1649/207/7412/6348/5331/2919/5594/3304/5970/468/3845/5606/6648/3708/3329/1536/7186/2920/3308/3309/10000/6258/3654/7409/9641/5332/4772/7410/7132/4067/817/3383/3576/51806/1535/839/6774/355/8503/7189/148022/834/10010/5530/4615/7157/…
hsa05142	Chagas disease	98	-0.485049087909991	-1.63412014233519	0.0012084777225679	0.00975624697975546	0.00682580485147464	3827	tags=36%, list=19%, signal=29%	414062/207/6348/915/5331/2771/2776/5594/5970/7048/3460/10000/3654/5519/5332/7132/916/3586/3576/1636/355/8503/7189/148022/8837/4615/6352/7124/4790/7042/3553/841/2353/718/5521
hsa04610	Complement and coagulation cascades	68	-0.485284449791158	-1.56981694834388	0.00478152153118537	0.025819471703216	0.0180641875487598	947	tags=19%, list=5%, signal=18%	1604/721/5627/629/2/710/5328/717/5327/718/3426/5104/1191
hsa04640	Hematopoietic cell lineage	85	-0.487067806871387	-1.61247361184155	0.00214237703749453	0.0147734749877227	0.0103360295668596	5533	tags=51%, list=27%, signal=37%	929/4311/952/3574/1379/3684/947/966/1436/3655/1441/3559/3552/915/3115/928/2811/914/3112/3117/916/920/3119/3109/3108/3123/3554/3566/3113/3563/3122/3568/7124/1604/3575/3111/1435/3673/3127/3553/3675/3690/3570
hsa05161	Hepatitis B	148	-0.492127693500144	-1.73445743017733	1.40429957953625e-05	0.000283869033402063	0.000198604507388945	5253	tags=45%, list=26%, signal=34%	6778/3265/4318/1385/4792/4214/8772/836/1026/64764/7187/1642/3716/3717/5894/4776/4775/1388/1654/207/890/5594/57506/2185/5970/468/3845/6655/5606/1871/7048/6773/10000/3718/3654/537/5579/9641/4772/3576/2033/6654/6774/355/8503/7189/148022/1643/3454/4615/7157/1959/7124/6772/7534/5578/4790/23586/7042/3665/7098/841/843/64135/2353/4609/8900
hsa04658	Th1 and Th2 cell differentiation	84	-0.492582081387044	-1.63026781765184	0.00193574189808286	0.0136325652822431	0.00953781002414846	4933	tags=45%, list=24%, signal=35%	3594/4792/54567/3716/3717/4775/3516/9794/3559/915/3115/5594/5970/3460/3718/3112/3117/4772/2625/916/920/3119/3561/3109/3108/3123/5530/3566/3113/3122/6772/3111/3560/4790/3127/84441/2353/55534
hsa04625	C-type lectin receptor signaling pathway	98	-0.49324534946078	-1.66173317455365	0.000662936962562678	0.00609533707245129	0.00426450677671898	5621	tags=49%, list=27%, signal=36%	5781/387/3551/5295/3265/51561/4792/64581/10892/5894/4776/4775/8915/207/5743/5594/5970/3845/3708/868/1540/6773/10000/3710/9641/64170/5058/4772/5580/3586/51806/3709/8503/834/5971/5530/4791/1959/7124/6772/23365/1263/602/6850/4790/3659/3553/841
hsa05213	Endometrial cancer	57	-0.4943392362134	-1.53939857995046	0.00781891362947816	0.0359452834910732	0.0251485526094327	6476	tags=58%, list=32%, signal=40%	5293/2309/5290/2885/673/2002/4292/595/1950/5295/1499/3265/5170/1026/5894/324/207/5594/3845/6655/1495/1647/10000/6932/6654/8313/8503/1643/7157/1496/999/4609/51176
hsa04217	Necroptosis	116	-0.496616486326602	-1.70125558609287	0.000201653074825709	0.00208584899272843	0.00145933146255447	5629	tags=47%, list=27%, signal=34%	329/9525/816/6778/25978/124044/54822/55072/8681/8772/3716/3717/3326/6609/10059/7416/10616/3552/5610/8737/197259/330/1536/7186/1540/3460/6773/3455/3718/5481/8878/331/7132/5321/817/823/6774/355/148022/8837/834/3454/2495/7124/6772/7128/81030/81858/8797/3553/9131/7098/841/824
hsa05169	Epstein-Barr virus infection	184	-0.498132188367058	-1.7984591231892	7.80067697516355e-07	5.16404815755827e-05	3.61294512533891e-05	3921	tags=39%, list=19%, signal=32%	3516/207/890/5610/3133/915/3115/8737/9636/5707/5702/3683/3134/7874/57506/5970/5606/1871/7186/3107/1647/6773/3106/10000/3455/3718/567/3654/9641/3112/3117/4067/916/894/3119/3383/3109/6774/3108/355/8503/7189/1643/3454/5971/3123/4938/4791/4615/7157/3113/3122/7124/6772/7128/3111/6890/6892/3135/6850/4790/4940/23586/3127/4939/3665/6891/841/4609/3627/8900
hsa05145	Toxoplasmosis	107	-0.500978700720909	-1.70537616936003	9.95241557546736e-05	0.00121278582637126	0.000848506540949841	4488	tags=45%, list=22%, signal=35%	3716/3717/598/3312/3655/3913/207/3115/2771/5594/3304/5970/330/5606/3460/10000/3654/3112/331/3117/7132/3119/3586/3109/10105/6774/3108/7189/3915/3909/3123/4615/3113/3122/7124/6772/240/3111/3911/4790/4261/7042/3127/3305/841/3949/3303/3918
hsa05160	Hepatitis C	136	-0.505130980542718	-1.76090855911302	1.08205949854352e-05	0.000238774462678603	0.000167054799775139	3228	tags=36%, list=16%, signal=31%	5594/57506/5970/3845/6655/1364/1871/7186/7533/6773/10000/3455/9641/5519/100506658/7132/6654/3646/6774/355/8503/7189/148022/8837/3454/4938/7157/7124/6772/9076/9021/3434/7534/4790/4940/23586/975/4939/3665/7098/841/3949/91543/4599/4609/3627/5521/9071/10686
hsa04380	Osteoclast differentiation	124	-0.506324760307191	-1.74597848832104	3.48442773376924e-05	0.000524247990853464	0.000366781866712552	6486	tags=55%, list=32%, signal=38%	10454/5293/5290/5609/2214/5532/10379/4688/3456/2209/2885/3937/653361/6688/3551/2212/5295/10859/1385/55423/4792/1436/11006/3716/207/2534/140885/3552/5594/5970/7048/126014/7186/1540/3460/6773/10000/3455/8878/4772/7132/1513/54/2355/1535/8503/7189/3454/5971/5530/4791/3554/7124/6772/9021/1435/6850/4790/7042/8061/3553/2354/2353/3726/3690/4982/7006/9846
hsa05152	Tuberculosis	159	-0.506408651875676	-1.79926240098414	3.20821337528285e-06	0.000117990958579847	8.25505195979213e-05	5068	tags=45%, list=25%, signal=34%	1385/1379/10333/51561/3684/3920/8772/836/64581/10892/3716/3687/3717/5894/8915/207/9902/3552/5869/3115/3313/5594/5970/3329/64127/5993/3460/10000/8767/3654/537/3112/64170/3117/7132/817/3689/3119/3586/2033/7096/51806/3109/11151/3108/5868/7189/3123/51606/5530/4615/3113/3122/3606/7124/6772/10312/3111/23365/1263/7421/6850/4790/4261/7042/972/3127/3553/841/843/3656/718
hsa05162	Measles	122	-0.513002952780958	-1.76637937995938	1.64702674887691e-05	0.000285378968225111	0.000199660909554856	4859	tags=45%, list=24%, signal=35%	4792/8772/836/7187/1457/3716/283106/598/440275/3312/207/1459/3559/3552/5610/915/57506/3304/5970/103/868/6773/10000/3455/3718/3654/9641/916/894/3561/6774/355/8503/7189/3454/4938/4615/7157/6772/7128/4478/8667/3560/4790/4940/23586/3553/3305/4939/3665/841/64135/4599/2353/3303
hsa04978	Mineral absorption	53	-0.515459099234829	-1.58710491905456	0.00773303107788832	0.0359452834910732	0.0251485526094327	2952	tags=30%, list=14%, signal=26%	4502/538/490/4495/6550/30061/2495/7421/493/491/115019/55630/26872/261729/10568/6523
hsa04620	Toll-like receptor signaling pathway	88	-0.516431103621706	-1.7189081148675	0.000161006390787181	0.00180344270734926	0.00126175034382839	4965	tags=45%, list=24%, signal=35%	10333/1326/4792/8772/7187/6696/54472/414062/207/6348/8737/5594/5970/5606/388372/4283/10000/3455/3654/9641/1513/6351/3576/7096/8503/7189/148022/3454/4615/6352/7124/6772/4790/3553/3665/7098/841/6373/2353/3627
hsa04623	Cytosolic DNA-sensing pathway	46	-0.518153355852235	-1.56420431418346	0.011092271361752	0.0464060851751727	0.032467288085667	3440	tags=37%, list=17%, signal=31%	8737/57506/5970/388372/103/9641/9447/6351/834/3606/6352/81030/4790/23586/3553/3665/3627
hsa05412	Arrhythmogenic right ventricular cardiomyopathy	69	-0.521952180367489	-1.69508978967741	0.00100637334961561	0.00854127124930171	0.00597576617855422	2271	tags=32%, list=11%, signal=28%	6932/1605/786/3696/3685/5318/3679/6262/1496/3693/27092/55799/3673/1832/4000/6445/3675/1824/3690/1000/3691/51176
hsa04668	TNF signaling pathway	109	-0.525785582597487	-1.79233489063086	1.68151518554685e-05	0.000285378968225111	0.000199660909554856	6486	tags=59%, list=32%, signal=40%	10454/5293/1906/5290/5609/1051/6374/3456/329/3551/4049/5295/4318/840/1385/1326/4792/257397/8772/836/64764/7187/10059/7185/1388/207/7412/5743/8737/2919/5594/197259/5970/330/468/5606/64127/7186/2920/10000/7132/3383/7424/355/8503/8837/153090/6352/7124/7128/9021/1435/602/4790/3600/3659/6364/3553/841/843/2353/3726/3627/3976
hsa04657	IL-17 signaling pathway	83	-0.53354519910197	-1.76428054826953	7.17876376251881e-05	0.000980540275228302	0.000686019591509704	4859	tags=48%, list=24%, signal=37%	4792/257397/55540/8772/836/7187/6426/6280/23765/3326/5743/2919/5594/5970/6278/7186/2920/132014/9641/3576/7189/6356/84818/29761/7124/4312/7128/4790/3934/6364/8061/3553/4322/841/1673/2354/2353/3627/727897/225689
hsa04621	NOD-like receptor signaling pathway	156	-0.534701449687609	-1.89929918984092	4.14377731887019e-08	3.68821101002499e-06	2.58039886215773e-06	4865	tags=48%, list=24%, signal=37%	55072/4792/257397/8772/7187/3716/598/3326/55054/10059/1508/199713/7416/10616/5331/8737/2919/5594/23710/57506/643246/5970/24145/330/3708/1536/64127/7186/2920/7158/6773/3455/3710/8767/9641/331/64170/9447/79184/5332/5580/3576/837/1535/3709/7189/148022/834/3454/10010/4938/4615/3606/114769/6352/7124/6772/2633/7128/81858/79671/4790/4940/79792/84674/115362/3553/4939/3665/841/115361/1673/2634/2635/3428
hsa04064	NF-kappa B signaling pathway	102	-0.535612570415054	-1.81027721605217	9.96785157807522e-06	0.000235668490881635	0.000164881755426808	4859	tags=57%, list=24%, signal=44%	329/3551/929/4049/472/4792/257397/7187/1457/10892/283106/598/8915/7185/7412/5743/1459/8737/4055/2919/6357/10913/5970/330/388372/7186/2920/79092/1540/1647/3654/5579/331/23085/7132/4067/7706/6351/3383/3576/7189/148022/8837/29775/5971/10673/4791/4615/3554/84433/7124/7128/8740/6850/4790/23586/5328/3553
hsa04216	Ferroptosis	39	-0.535998618850915	-1.58562998089764	0.0109626708248006	0.0464060851751727	0.032467288085667	2085	tags=26%, list=10%, signal=23%	5621/2181/30061/7157/2495/6303/6520/1356/64116/23657
hsa05140	Leishmaniasis	72	-0.538121204135303	-1.74756731446683	0.000240628372224783	0.00241357549110313	0.00168862015596339	3763	tags=43%, list=18%, signal=35%	5743/3552/3115/5594/5970/1536/3460/3654/5579/3112/3117/3689/3119/3586/3109/1535/3108/7189/3123/4615/3113/3122/7124/6772/3111/4790/7042/3127/3553/2353/718
hsa02010	ABC transporters	41	-0.538783971350457	-1.6001514425285	0.00842932687448995	0.0377041512899483	0.026379116819172	3245	tags=24%, list=16%, signal=21%	4363/22/154664/10060/19/10257/6890/6891/1080/1672
hsa04622	RIG-I-like receptor signaling pathway	52	-0.539398368730884	-1.6544619453309	0.00236540617391844	0.015978560072796	0.0111791484051999	4859	tags=52%, list=24%, signal=40%	4792/4214/8772/7187/1654/8737/9636/57506/5970/7186/1540/9641/7706/3576/7189/79132/10010/54941/7124/79671/4790/23586/3665/841/843/64135/3627
hsa04659	Th17 cell differentiation	98	-0.554211023032623	-1.86712524240404	5.23637373981724e-06	0.000144436642323292	0.000101052826557876	4933	tags=48%, list=24%, signal=37%	3594/51561/4792/4087/3716/3717/3326/4775/50943/3559/915/3115/5594/5970/3572/7048/3460/3718/3091/6258/3112/3117/4772/2625/3556/916/920/3119/3561/3109/6774/3108/3123/5530/3554/3566/3113/3122/196/6772/3111/3560/4790/3127/3553/2353/3570
hsa04672	Intestinal immune network for IgA production	39	-0.566288362296681	-1.67523529634466	0.0033067175105757	0.0200764220170387	0.0140461531046224	3494	tags=49%, list=17%, signal=41%	3115/4055/8741/6370/3112/3117/3119/3586/3109/3108/10673/3123/3113/3122/3111/3601/3600/3127/7852
hsa05164	Influenza A	148	-0.570734361723832	-2.01149918491455	1.09200107823362e-09	1.80726178447664e-07	1.26442230111262e-07	4859	tags=51%, list=24%, signal=39%	4792/3337/10482/8772/836/7187/402569/3716/3717/8106/5894/7416/207/7177/3552/5610/3115/5594/57506/5970/4928/103/3460/6773/10000/3455/23633/5579/9641/3112/3117/7132/5371/7706/3119/3383/3576/2033/3109/3108/355/8503/148022/834/3454/3123/4938/4615/3113/3122/3606/6352/7124/6772/9021/3111/5578/5644/79671/8797/4790/4940/23586/4261/3127/3553/4939/3665/7098/841/91543/64135/56000/56649/4599/3627
hsa05134	Legionellosis	56	-0.576185567337573	-1.78847244260549	0.00017594426337527	0.00187863068313595	0.00131435442928894	5072	tags=50%, list=25%, signal=38%	840/1379/3684/4792/836/3312/7415/2919/3304/5970/3329/1195/2920/23786/3689/3576/834/4791/4615/3606/7124/3297/4790/3553/3305/841/718/3303
hsa05416	Viral myocarditis	55	-0.586952445546979	-1.81776559423088	0.000102592154496663	0.00121278582637126	0.000848506540949841	4736	tags=58%, list=23%, signal=45%	836/8672/1982/5880/1981/2534/3133/6443/3115/3683/3134/25/3107/3106/3112/3117/1605/3689/3119/3383/5551/3109/3108/3123/3113/3122/1604/3111/3135/6445/3127/841
hsa05150	Staphylococcus aureus infection	61	-0.590517160704311	-1.86065080409292	7.70212905013168e-05	0.000980540275228302	0.000686019591509704	2246	tags=39%, list=11%, signal=35%	3112/3117/3689/3119/3383/3586/3109/3108/3868/3123/5724/3113/3122/3111/721/629/3127/1673/717/718/3426/25984/1672/3861
hsa04612	Antigen processing and presentation	61	-0.591539383379737	-1.86387170869919	7.30028924498131e-05	0.000980540275228302	0.000686019591509704	3582	tags=62%, list=17%, signal=52%	1385/5721/2923/3326/3312/1508/3133/821/3115/3134/3304/3308/5993/3309/3107/3106/567/3805/3112/3117/920/3119/3109/3108/3123/3113/3122/7124/3111/6890/6892/3135/4261/972/3127/3305/6891/3303
hsa05322	Systemic lupus erythematosus	46	-0.593483954289919	-1.79161275559449	0.000382919927523407	0.00372783811794846	0.00260812334536067	2246	tags=39%, list=11%, signal=35%	3112/3117/6737/3119/3586/3109/3108/87/3123/3113/3122/7124/3111/721/3127/717/718/2903
hsa05323	Rheumatoid arthritis	85	-0.618592592496512	-2.04789603790148	4.45705258009062e-08	3.68821101002499e-06	2.58039886215773e-06	3739	tags=47%, list=18%, signal=39%	6348/3552/3115/2919/3683/2920/8741/537/3112/3117/1513/3689/54/3119/3383/3576/3109/3108/2321/10673/3123/51606/3113/7422/3122/3606/6352/7124/4312/10312/245973/3111/1435/7042/3600/6364/528/3127/3553/2353
hsa05143	African trypanosomiasis	33	-0.631457442468022	-1.8011266841052	0.000902644068695859	0.00786250491416656	0.00550087798097199	3779	tags=52%, list=18%, signal=42%	7412/5331/2776/5579/5332/2150/3383/3586/355/4615/3606/7124/5578/3553/3620/8542/335
hsa05321	Inflammatory bowel disease	53	-0.635225968444715	-1.95586858535697	8.87203210752357e-06	0.000225895586737716	0.000158044296652242	3678	tags=58%, list=18%, signal=48%	3594/51561/4087/50943/3552/3115/5970/64127/3460/3112/3117/4772/2625/3119/3586/3561/3109/6774/3108/3123/3566/3113/3122/3606/7124/6772/3111/4790/7042/3127/3553
hsa00604	Glycosphingolipid biosynthesis - ganglio series	15	-0.688679818466631	-1.66431729759716	0.00739120775280084	0.0357569395583685	0.0250167807372908	57	tags=20%, list=0%, signal=20%	2720/6482/81849
hsa00533	Glycosaminoglycan biosynthesis - keratan sulfate	14	-0.699263348254812	-1.66606434028135	0.00421092096598641	0.0236239803346017	0.0165281465212669	1762	tags=36%, list=9%, signal=33%	93010/2530/2683/6482/8534
hsa05320	Autoimmune thyroid disease	32	-0.703352771658095	-2.00602049243477	1.45793763378703e-05	0.000283869033402063	0.000198604507388945	3582	tags=66%, list=17%, signal=54%	3133/3115/7173/3134/3107/3106/3112/3117/3119/3586/5551/3109/3108/355/3123/3113/3122/3111/3135/3002/3127
hsa04940	Type I diabetes mellitus	37	-0.711393651337115	-2.08764023188852	1.55627970233326e-06	7.35897973531869e-05	5.14859450395965e-05	3678	tags=68%, list=18%, signal=56%	3552/3133/3115/3134/3329/3107/3106/3112/3117/3119/5551/3109/3382/3108/355/3123/3113/3122/7124/3111/3135/3002/1363/3127/3553
hsa05330	Allograft rejection	31	-0.730524090470124	-2.06004377968443	2.53154111603136e-06	0.000104742513675798	7.32814533588025e-05	3582	tags=68%, list=17%, signal=56%	3133/3115/3134/3107/3106/3112/3117/3119/3586/5551/3109/3108/355/3123/3113/3122/7124/3111/3135/3002/3127
hsa05332	Graft-versus-host disease	32	-0.736199334453241	-2.09970161622955	1.06670205855023e-06	5.88463968966878e-05	4.11709566457985e-05	3678	tags=69%, list=18%, signal=57%	3552/3133/3115/3134/3107/3106/3112/3117/3119/5551/3109/3108/355/3123/3113/3122/7124/3111/3135/3002/3127/3553
hsa05310	Asthma	21	-0.77301120970287	-2.01489003549414	1.72434421888284e-05	0.000285378968225111	0.000199660909554856	2246	tags=62%, list=11%, signal=55%	3112/3117/3119/3586/3109/3108/6356/3123/3113/3122/7124/3111/3127
