# Supplementary material for: Identifying the Role of Oxidative Stress-Related Genes as Prognostic Biomarkers and Predicting the Response of Immunotherapy and Chemotherapy in Ovarian Cancer
Source: Oxid Med Cell Longev. 2022 Dec 12;2022:6575534. doi: 10.1155/2022/6575534 (PMC9764017; doi:10.1155/2022/6575534)
Supplement: Supplementary 17 — Supplement Table 16: signaling pathway analysis in regard to TRPM2. [file 6575534.f17.txt]

ID	Description	setSize	enrichmentScore	NES	pvalue	p.adjust	qvalues	rank	leading_edge	core_enrichment
hsa04260	Cardiac muscle contraction	71	0.331415723360686	1.49967849403031	0.00304478858524024	0.00910668585949126	0.00489497112268287	2980	tags=37%, list=15%, signal=31%	482/7134/7139/9254/341947/477/481/1339/84701/7137/1340/70/1329/1347/1350/1327/10345/55799/9167/1346/7381/3270/29796/10975/4634/1351
hsa00190	Oxidative phosphorylation	103	0.303119803953939	1.44291432762837	0.00196835938092593	0.00626181539843131	0.00336581342804818	3015	tags=35%, list=15%, signal=30%	341947/534/4696/56901/1339/84701/4707/4698/4710/1340/4714/1353/4717/1329/1347/1350/4724/1327/55967/4726/4709/4725/4704/9167/1346/7381/4706/29796/10063/10975/4729/4716/4697/51079/1351/4718
hsa04080	Neuroactive ligand-receptor interaction	236	-0.418758843790634	-1.25489794279006	0.0120313655275737	0.0300473016791816	0.0161508452474884	3699	tags=23%, list=18%, signal=19%	553/1902/134/1909/2358/3269/3363/5023/56413/3640/4157/154/624/9294/1143/554/5739/5734/5021/8973/706/5733/1241/1901/187/5025/5029/10800/57152/6869/133/3274/79924/286530/2908/10161/27334/66004/8698/2899/5027/2906/2568/2564/5732/5031/728/3001/53829/2357/140/5724/2359/718/719
hsa04141	Protein processing in endoplasmic reticulum	156	-0.438549714083147	-1.29444750151775	0.0205769026039674	0.0497779482110683	0.0267563439432394	7994	tags=61%, list=39%, signal=37%	22872/10273/201595/6400/10808/3306/1388/6748/27102/1649/6747/118424/7326/821/9601/27248/56886/3301/468/5610/7322/9373/51360/267/581/440275/10427/5886/10960/23193/55768/3703/10483/10130/85479/25956/10113/80700/6396/5601/811/824/6184/51465/5034/3303/3309/5887/7841/6185/10956/91319/55741/5611/29979/79139/54788/91445/2081/2923/10134/3337/29927/29978/3300/573/7415/57134/10802/6238/10525/9871/1410/5112…
hsa05200	Pathways in cancer	485	-0.441899482962158	-1.3427713758018	2.4992955391636e-05	0.000119169309041279	6.40551717131176e-05	5692	tags=44%, list=28%, signal=33%	8453/5566/5747/3714/1643/2323/387/54567/2767/1869/2149/4855/1647/3655/5366/3572/55970/207/5595/5601/3725/1499/3595/2308/23401/5728/324/5295/867/6789/317/9826/23365/2252/9134/5567/51684/6932/331/51426/5594/3688/5154/3569/9618/3918/8031/9002/5894/637/818/6667/5888/2064/5925/8323/5899/7422/10125/2771/9817/6199/5914/1902/3911/4313/27113/1909/8325/3574/3458/5155/3551/5579/5290/10018/5156/8900/1612/533…
hsa04010	MAPK signaling pathway	275	-0.443385651557469	-1.33226791435549	0.00126096403591905	0.00419047644259968	0.00225243974518236	5413	tags=45%, list=26%, signal=34%	777/1647/55970/207/5921/5595/5601/3725/5906/4216/3643/6789/3556/2252/5567/5594/1326/3303/5058/5154/6197/23118/5801/6788/10746/5894/1969/7786/2064/2321/7422/10125/7132/5533/1432/9344/3791/51135/5155/3551/5579/5156/374/5970/5924/2005/3082/8605/4791/836/5159/9261/4215/10912/409/5908/2885/11184/8717/5600/2002/778/5604/3554/5871/7124/2768/1849/7186/93589/4296/4609/1942/1956/25780/1845/4217/1946/51347/…
hsa05168	Herpes simplex virus 1 infection	462	-0.458481837774657	-1.3909588458433	3.62927215884261e-06	1.95515371785559e-05	1.05092249112059e-05	3597	tags=21%, list=18%, signal=18%	51135/2923/8891/3458/90592/3551/5290/7187/6714/5970/94039/8772/836/29110/5452/10379/5291/126375/8717/7124/3460/7186/6041/3690/7592/3054/6672/7297/100131017/3454/4792/3459/2475/6892/286075/8517/355/9021/23586/3455/3716/147741/6772/3717/3592/4790/4049/4615/6773/90649/5371/3665/6347/25833/139735/64135/8740/578/5293/356/148022/7098/29992/8503/684/3105/64170/6891/9641/330/3678/3109/3654/3133/8764/3134…
hsa04015	Rap1 signaling pathway	196	-0.458969117188064	-1.3663352103262	0.00338532877882089	0.00968498407158325	0.00520581450656211	4291	tags=37%, list=21%, signal=30%	9002/5909/5894/9855/1969/25865/5899/2321/7422/7408/2771/1432/1902/57568/3791/5155/5579/5290/5156/83660/5900/6714/5584/7410/3082/7074/5159/9732/9564/5908/5291/5600/5604/7094/112/10636/3690/9771/1942/1956/25780/1946/23094/7057/5331/2324/115/22808/5606/196883/2889/5603/109/5293/6494/10411/8503/83593/10451/113/51806/57121/5330/5880/3937/2357/3683/3684/1435/54518/7409/3689/1436
hsa04151	PI3K-Akt signaling pathway	311	-0.459927246944065	-1.38467558107977	0.000111114072683765	0.000440440119433238	0.00023674272937061	4166	tags=36%, list=20%, signal=29%	5894/1969/2064/2321/7422/23678/5519/5934/29941/6199/1902/3911/3791/2997/7534/3574/5562/5155/3551/5290/10018/5522/5156/374/5970/3082/1278/5159/3693/3371/2885/6256/5291/1292/1277/5604/930/1291/90993/5106/3913/4846/3690/4609/1942/1956/1946/3454/7148/146850/7057/2475/3910/4170/2793/8517/7533/1026/2324/1293/896/3455/54331/7450/3164/3716/5105/3691/5526/3685/898/3717/4790/2065/3680/3696/7039/10161/3694/…
hsa04371	Apelin signaling pathway	129	-0.461665792922883	-1.35481111663017	0.013689058566397	0.0338624080326663	0.0182015183154309	3824	tags=30%, list=19%, signal=25%	2771/4205/6199/5564/5562/51422/4638/5604/112/3709/4846/3708/8678/146850/4209/2475/5331/187/2793/115/3710/22808/54331/196883/59/8877/4208/6548/109/10365/1958/59345/113/5054/5294/23533/51806/5330/6696
hsa04810	Regulation of actin cytoskeleton	199	-0.4639115779	-1.38129081633039	0.00197941884935215	0.00626181539843131	0.00336581342804818	6572	tags=53%, list=32%, signal=36%	10094/4893/10458/3681/5062/3675/998/1399/4660/10552/7852/8516/7430/8515/10109/5747/387/7414/2149/3655/55970/5595/5499/324/5295/60/10097/81/23365/85464/2252/5594/128239/3688/5058/5154/5894/79837/81873/87/85477/1902/54776/54961/5155/4629/5290/5156/9138/6714/221178/7410/23396/7074/624/5829/5159/3693/4638/23191/9564/5291/10163/5604/4627/3984/79784/2768/54434/3690/1956/3985/2934/369/22808/8826/1729/36…
hsa04919	Thyroid hormone signaling pathway	115	-0.467059921037542	-1.36132173651892	0.010868290394635	0.0281548625183852	0.0151336327086505	6081	tags=54%, list=30%, signal=38%	208/1734/3091/9968/6513/5578/5566/9882/4855/5170/207/6567/5595/1499/2308/5295/60/10231/8841/5567/5350/5594/23389/476/5894/488/5469/1735/5214/5579/5290/6714/3065/9282/113026/5336/6256/5291/5604/5208/483/3690/4609/4853/4851/2475/5331/8850/2099/10499/3685/6772/478/8202/1733/6548/5293/1827/8503/5211/489/5330
hsa04722	Neurotrophin signaling pathway	115	-0.468558416369415	-1.36568934370478	0.00936924152333866	0.0244641306442732	0.013149812664335	6323	tags=57%, list=31%, signal=39%	25970/91860/5879/468/11108/4915/5781/5598/4893/998/1399/581/7189/208/5664/387/5607/396/5170/207/5595/5601/3725/5906/5295/4793/5594/6197/5894/818/1432/51135/6464/3551/5290/8767/5970/9261/6272/4215/5580/5336/5908/2885/5291/5600/5604/11213/4794/4217/4792/4145/6196/2889/4790/5603/6195/5293/356/8503/3656/3654/397/51806/10019
hsa04921	Oxytocin signaling pathway	136	-0.468604151869214	-1.37502770053262	0.0120554523454467	0.0300473016791816	0.0161508452474884	5759	tags=45%, list=28%, signal=32%	5578/5566/786/387/5607/5595/3725/5499/60/3759/6261/5567/5594/5894/818/5533/2771/5564/54776/29904/10645/5562/5579/4776/6714/3762/51422/8605/4638/5021/8536/2002/778/5604/112/3709/4846/93589/1956/3708/146850/5331/1026/115/3710/196883/4881/2353/5997/4208/4773/109/4772/1827/952/113/5294/23533/51806/5330/7226
hsa04935	Growth hormone synthesis, secretion and action	104	-0.469911571517448	-1.35849660162291	0.0109561149634806	0.0281606392420711	0.0151367377784929	5842	tags=48%, list=28%, signal=35%	64764/5578/5566/5747/2767/207/5595/5601/5295/51738/5567/5594/5894/2771/1432/6464/5579/5290/5336/9564/2885/5291/5600/778/5604/90993/112/3709/6774/3486/3708/2475/5331/9021/115/3710/5606/6772/196883/3717/8651/5603/2353/109/5293/8503/3726/6776/113/5330
hsa05165	Human papillomavirus infection	304	-0.473945177524405	-1.4267639122245	1.85702631009712e-05	9.11883068689481e-05	4.90149913741266e-05	5405	tags=46%, list=26%, signal=34%	1869/4855/3655/3661/207/5595/3993/8992/1499/2308/5728/324/5295/523/1101/9134/3955/5567/545/6932/5594/3688/9368/3918/5525/5315/5894/5925/8323/7422/529/7132/3135/5519/5934/6199/3911/3996/23513/8325/3551/10134/5290/5522/1741/8900/7187/26508/5970/5584/7483/3065/8772/1278/5829/836/5159/3693/29110/9794/3371/8321/10379/5734/2885/533/5291/8717/1292/1277/5604/1291/7124/90993/3913/3690/1956/4853/9114/7297/…
hsa04926	Relaxin signaling pathway	121	-0.47540724937943	-1.38936246886227	0.00571150247782333	0.0159244433491854	0.00855961120672898	3824	tags=36%, list=19%, signal=30%	5894/7422/2771/1432/4313/6464/5290/3640/6714/5970/1278/1281/409/2885/5291/5600/1277/5604/90993/112/4846/1956/4322/4792/5331/2793/115/54331/196883/59/4790/5603/7048/2353/109/5293/8503/59345/113/408/7040/5330/2769/4318
hsa05222	Small cell lung cancer	91	-0.47899442513218	-1.37426169636809	0.0114557502600391	0.0292166033763787	0.0157043332818161	6429	tags=56%, list=31%, signal=39%	7709/3675/4149/581/7189/208/5747/1643/1869/1647/3655/207/5728/5295/317/9134/331/51426/3688/9618/3918/5925/3911/3551/5290/7187/5970/836/10912/6256/5291/1870/3913/5915/7186/4609/4792/3910/8517/1026/4616/3685/7185/898/4790/1030/578/5293/8503/330/2335
hsa05210	Colorectal cancer	85	-0.4829760682664	-1.37957188824808	0.0173006444099744	0.0421623111917153	0.0226628324434752	5640	tags=48%, list=27%, signal=35%	1643/387/1647/5366/207/5595/5601/3725/1499/324/5295/6932/51426/5594/5894/5899/6199/27113/5290/10018/374/5900/836/10912/2885/5291/5604/4609/1956/2475/1026/369/4616/7048/2353/7039/578/5293/8503/7040/5880
hsa04910	Insulin signaling pathway	126	-0.489578816291476	-1.43595819890941	0.00224063952926529	0.00695443778422907	0.00373810765557666	6793	tags=56%, list=33%, signal=37%	5590/3991/32/4893/5571/1399/5256/23433/208/3099/57521/5566/79660/5170/207/5595/5601/2308/5499/868/3643/5295/867/5567/9322/5594/10580/2319/31/2194/5894/5836/23265/6199/5564/2997/5834/5562/6464/3551/5290/5575/51422/5584/3098/5576/5509/2885/89801/5291/2002/5604/5106/3636/5792/2475/9021/369/5105/8569/2872/5770/2889/8651/6720/5293/8503/3101/51806/2203
hsa04510	Focal adhesion	192	-0.497317171291119	-1.47872911862181	4.23752009998994e-05	0.000190978645602286	0.000102653695284544	5647	tags=51%, list=27%, signal=37%	5747/387/7414/55742/5170/3655/207/5595/5601/3725/1499/824/5499/5906/5728/5295/60/81/1101/331/5594/3688/5058/5154/7791/3918/5894/2064/2321/7422/87/7408/3911/3791/54776/6464/5155/5579/5290/5156/83660/6714/7410/3082/3611/23396/1278/5829/5159/3693/4638/3371/9564/5908/2885/5291/2002/1292/1277/5604/1291/7094/3913/29780/3690/1956/7148/7057/3910/2316/2317/2324/1293/896/1729/7450/3691/3685/2889/3680/3696/…
hsa05130	Pathogenic Escherichia coli infection	184	-0.498915399571436	-1.48144287507249	8.96811073833323e-05	0.000368813554113954	0.000198242447899998	5272	tags=52%, list=26%, signal=39%	5595/5601/3725/7122/60/10097/9826/23365/8797/55930/4793/1364/5594/4642/3688/5058/9368/3569/8795/8737/23118/9265/81873/1366/4643/10006/7132/7009/4690/1432/1902/84617/114609/51135/10376/5777/4629/3551/9138/6714/5970/4645/8772/836/10802/23191/837/9871/8717/10163/5600/3554/7124/4627/79784/2017/2768/7100/7186/3576/4792/137075/9267/3606/8517/355/4641/840/84790/29108/4790/4615/5603/2353/64005/9632/578/1…
hsa05205	Proteoglycans in cancer	191	-0.499576068671403	-1.48553478533944	4.51814659522444e-05	0.000200874355382276	0.000107972777809062	4166	tags=42%, list=20%, signal=34%	5894/1634/818/2064/8323/7422/1432/6199/4313/3791/54776/8325/5777/5579/5290/9138/6714/7483/7410/3082/4060/7074/1278/5829/836/3693/5336/8321/2885/5291/5600/2002/7078/1277/5604/7124/2017/3709/3690/6774/4609/1956/3708/6385/7057/2475/7477/2316/2317/355/1026/2099/369/3710/22808/8826/6382/3685/5603/2065/4478/6548/3339/1839/960/5293/356/10855/8503/1514/10451/5329/3678/7040/2335/3059/5328/7099/7097/4318/7…
hsa05132	Salmonella infection	244	-0.50221952284605	-1.50752888965966	4.52792460244857e-06	2.32763624094622e-05	1.25113706120289e-05	5319	tags=46%, list=26%, signal=35%	207/5595/5601/3725/1499/838/57381/60/10097/64837/1778/8797/6932/5594/5058/3569/8795/302/10121/8737/23118/29109/9265/5894/81873/64601/10006/7132/1783/23265/63916/1432/84617/5869/114609/51135/55207/10376/3551/5290/6990/8767/5970/8772/9367/836/23191/837/4074/5878/5291/391/8717/5600/5604/7124/7100/7186/23207/51429/4609/23339/10392/3576/79443/4792/1785/2316/9267/257364/3606/5287/2317/8517/58484/399/56…
hsa04140	Autophagy - animal	136	-0.504154172972221	-1.47934231997457	0.00102370710881229	0.00350832957082544	0.00188577625307526	6615	tags=57%, list=32%, signal=39%	23710/4893/64422/30849/7879/84938/3916/440275/7189/4218/208/643246/3091/8673/57521/6794/64121/5566/5170/7405/207/5595/5601/26100/5728/5295/5567/84971/5594/9342/81671/5894/64419/53349/55054/89849/9776/64798/6199/8837/2081/10645/5562/79065/5290/8408/1612/29982/55014/29110/5580/51100/58476/5291/5604/10533/60673/5588/55626/58528/3920/3708/55062/8678/2475/115201/140775/22808/23604/23130/8878/1508/5293…
hsa04012	ErbB signaling pathway	82	-0.505352116749195	-1.43974466681117	0.00768590976798956	0.02055824645259	0.0110503452376743	6568	tags=54%, list=32%, signal=37%	4893/5062/6777/1399/208/5578/5747/207/5595/5601/3725/868/5295/867/5594/5058/5894/818/2064/4690/6199/6464/5579/5290/374/6714/5336/2885/5291/2002/5604/9542/4609/1956/2475/685/1026/369/2065/7039/1839/5293/8503/6776
hsa05215	Prostate cancer	93	-0.50710665169598	-1.45635593859288	0.00321146616199664	0.00926817866049907	0.0049817757637621	5456	tags=47%, list=27%, signal=35%	1869/6935/5170/207/5595/1499/2308/5728/7113/5295/9134/6932/5594/5154/5894/2064/5925/5155/3551/5290/5156/5970/5159/2885/5291/2078/5604/1870/90993/1956/4824/4792/2475/8517/1026/369/6692/898/4790/7039/5293/8503/5328/4318
hsa05231	Choline metabolism in cancer	89	-0.509484856696521	-1.46038438986767	0.0031771278241167	0.00925022171800348	0.00497212365581374	6651	tags=57%, list=32%, signal=39%	1606/1119/4893/8681/208/160851/3091/5578/5338/5170/23446/207/5595/5601/3725/5295/6584/5594/5154/5894/6583/6667/10434/6199/5155/5579/5290/57153/5156/5337/5900/23396/8605/126969/5159/2885/5291/10163/5604/56994/1956/2475/8525/1609/5130/80736/2353/5293/8503/5880/7454
hsa05211	Renal cell carcinoma	65	-0.51630914716657	-1.44364225051524	0.00742820333169975	0.0201973462490018	0.0108563563264511	7219	tags=63%, list=35%, signal=41%	5879/405/2033/5781/4893/5062/998/1399/208/3091/6513/8453/207/5595/3725/5906/5295/5594/5058/5894/7422/201163/5155/5290/7428/3082/5908/2885/5291/5604/112399/1026/369/2113/7030/2889/7039/2034/5293/8503/7040
hsa04512	ECM-receptor interaction	80	-0.517289266344613	-1.47179998961863	0.003805753660877	0.0107939047795563	0.00580187490950396	2947	tags=39%, list=14%, signal=33%	1278/3693/3371/1292/1277/1291/3913/3690/7148/6385/7057/3910/1293/7450/6382/3691/3685/3680/3696/3339/3694/960/3381/22801/7058/3678/1311/3676/3695/2335/6696
hsa04915	Estrogen signaling pathway	112	-0.519537929562027	-1.51315655863344	0.000685073863726546	0.00242354087275305	0.00130268714324912	5319	tags=47%, list=26%, signal=35%	207/5595/3725/5295/5567/5594/3303/7031/5894/6667/2771/3880/2852/5914/4313/6464/5290/6714/3762/5580/2885/5291/5604/90993/112/3709/4846/1956/3708/5331/3866/2099/115/3710/3310/10499/196883/3312/2353/8202/109/7039/1839/5293/8503/113/25984/1509/3868/2289/51806/5330/4318
hsa04912	GnRH signaling pathway	84	-0.521682309700165	-1.48924332860799	0.00269381482573457	0.00820615812654326	0.00441092486085192	5759	tags=52%, list=28%, signal=38%	5578/5338/5566/2767/5595/5601/3725/4216/5567/5594/10746/5894/818/1432/4313/5579/5337/6714/8605/4215/5580/2885/5600/2002/778/5604/112/3709/1956/3708/5331/4323/115/3710/5606/2185/196883/5603/109/1839/1958/113/51806/5330
hsa05202	Transcriptional misregulation in cancer	156	-0.52323500010445	-1.54440925815638	2.0524992558771e-05	9.93047434093479e-05	5.33776896265252e-05	3290	tags=36%, list=16%, signal=30%	8900/8013/5090/5970/3065/604/2005/4086/10912/4286/6256/7704/2078/1031/4609/3486/3576/55589/5468/3087/4005/860/1026/4094/4299/1051/6692/4616/7030/7185/64332/4790/26471/7048/5371/4208/597/2313/578/4066/3002/330/958/861/51513/1050/3695/5328/2209/942/6688/4318/3684/929/3560/1436
hsa03320	PPAR signaling pathway	64	-0.524198115084059	-1.46268608274053	0.00905075909769776	0.0238215979451405	0.0128044423445324	6039	tags=61%, list=29%, signal=43%	3157/1582/10873/79966/11001/5170/5346/3158/2182/1622/6342/10580/1375/440503/8310/5465/30/3611/1593/7316/6256/2710/6319/10062/5106/1374/4199/5360/123/5467/5468/1376/5105/729359/10999/51129/2180/51703/4973
hsa04144	Endocytosis	239	-0.525427799198377	-1.57521389163418	4.04364579148972e-08	2.51011219886815e-07	1.34922044284066e-07	6793	tags=57%, list=33%, signal=39%	5590/4088/5119/9727/6455/10015/10094/382/8411/9798/3577/7879/998/10552/7852/7189/8766/4218/274/1212/5338/64411/10109/22905/387/8218/116987/163/29934/868/58533/832/867/10097/9525/8853/830/1173/128866/50807/9744/55040/2060/9372/3303/161/160/84364/55048/273/9829/55738/2870/2869/440073/116988/9146/829/9101/9265/81873/64145/23527/3135/118813/79643/30845/83737/89853/116984/23550/26286/5869/56904/25978/…
hsa04068	FoxO signaling pathway	123	-0.526627051334548	-1.54094543787607	8.8819249664528e-05	0.000368813554113954	0.000198242447899998	5403	tags=47%, list=26%, signal=35%	1647/5170/207/5595/5601/2308/5728/3643/5295/6789/9455/4303/5594/3569/5894/1032/23678/5934/847/1432/5564/5562/3551/5290/10018/51422/604/10912/2885/5291/5600/5604/5106/116986/6774/1956/80854/1901/1026/369/3586/5105/4616/1263/5603/7048/6648/6446/10365/1030/5293/356/8503/8698/3575/114907/7040/8743
hsa04071	Sphingolipid signaling pathway	115	-0.528352454870791	-1.53996874696711	0.000212626559999176	0.000804070554479641	0.00043219917821974	5864	tags=55%, list=29%, signal=39%	6610/5578/5338/4363/427/387/8560/5170/207/5595/5601/5728/5295/1903/5594/5525/5894/637/7132/5519/2771/1432/8439/134/5579/5290/5522/5337/9846/5970/166929/10558/624/9294/5291/8717/5600/259230/5604/7124/2768/7186/4846/4217/1901/5331/130367/2205/340485/5526/6609/4790/5603/8877/5293/81537/8503/8698/1509/5330/2207/5880/140
hsa05131	Shigellosis	215	-0.529946307991002	-1.58328033007469	5.74716196932945e-07	3.37645765698105e-06	1.81489325347246e-06	5869	tags=53%, list=29%, signal=39%	3099/57521/257397/10616/10454/10109/64121/5747/387/7414/3661/207/5595/5601/26100/3725/824/2308/5295/60/10097/81/81858/5481/4793/7416/4303/5594/3688/8737/23118/9265/81873/55054/87/7132/63916/1432/6199/3551/5290/23291/83660/10241/6714/8767/5970/3611/113026/3098/8915/5829/29110/7316/5580/5336/9564/837/23048/5291/8717/10163/5600/3554/7124/2017/10318/7094/5588/7100/3709/7186/58528/25851/1956/831/7314/…
hsa04066	HIF-1 signaling pathway	102	-0.530123000442717	-1.53210520417916	0.000568956770482984	0.00207985308321002	0.00111795014551042	6081	tags=54%, list=30%, signal=38%	208/3091/2023/3099/6513/5578/8453/207/5595/226/3643/5295/5594/3569/5160/818/2064/2321/7422/6199/5214/3458/5579/5290/7428/5970/3098/5336/5291/5604/3460/112399/4846/6774/1956/230/3459/5230/2475/7037/1026/7076/8569/2872/4790/5209/5293/8503/3570/5211/5054/3101/7099/3162/1536
hsa05418	Fluid shear stress and atherosclerosis	134	-0.531752520410633	-1.56087495745208	5.3145202869584e-05	0.000233130289921242	0.000125310794134598	3996	tags=40%, list=19%, signal=32%	7422/7132/9817/4205/1432/4313/3791/5562/3458/5155/3551/5290/445/6714/5970/1003/5291/5600/3554/7124/4846/3690/4217/6385/8517/6382/7412/6612/3685/4790/5603/1535/2353/4208/6347/7056/10365/8878/5293/59341/8503/1514/1728/5175/1843/51806/653361/4688/3553/5880/3383/3162/4318
hsa05203	Viral carcinogenesis	161	-0.53181585466292	-1.56909421945627	6.46349399382293e-06	3.27152234456576e-05	1.75848905418988e-05	5960	tags=64%, list=29%, signal=46%	2965/1739/5879/6850/7532/468/5610/841/2033/4055/10014/4893/6777/998/7529/581/5933/6722/5966/9093/64764/5566/387/991/5366/3572/2959/3661/5595/3725/5295/81/9134/8841/5567/5594/5315/10013/83933/5925/87/3135/5934/1642/85477/23513/7534/5290/8900/7187/6714/5970/3065/9734/4791/5829/836/9261/8379/10379/1237/2885/5291/8717/90993/1654/79885/51564/7186/1233/6774/9114/6672/4792/1960/2934/23352/8517/7533/1026…
hsa04072	Phospholipase D signaling pathway	133	-0.534804356571787	-1.56926548507705	3.51140054537523e-05	0.000162711377384289	8.74596429389234e-05	3699	tags=37%, list=18%, signal=30%	553/1902/6464/5155/5290/5156/3579/5337/5900/9846/23396/8605/10555/5159/5336/554/2885/5291/5604/2768/112/1956/3576/146850/1785/2475/5331/9267/8525/2205/115/22808/1609/2185/196883/8877/109/10161/5293/10411/8503/113/5294/23533/56894/57121/5330/2207/27128
hsa04928	Parathyroid hormone synthesis, secretion and action	97	-0.535311318538604	-1.54192973478656	0.0005242883359782	0.00193809957906548	0.00104175565280116	5842	tags=61%, list=28%, signal=44%	64764/5578/5338/5566/387/2767/5595/4324/1594/10893/9826/5567/5594/9368/5143/5894/6667/2771/4205/4929/5579/11214/5337/9138/409/6256/5604/90993/64386/1591/2768/112/3709/1956/3708/4322/2625/4209/5331/860/1026/4323/369/115/3710/5141/196883/2353/4208/109/1839/1958/5142/9935/113/408/7421/10568/5330
hsa05223	Non-small cell lung cancer	72	-0.537225747630065	-1.51519130936112	0.00310531558773476	0.00912635098795374	0.00490554140449921	6568	tags=61%, list=32%, signal=42%	4893/27436/6777/581/208/5578/1643/1869/1647/5170/207/5595/5295/6789/51426/5594/5894/2064/5925/5579/5290/3082/10912/5336/2885/6256/5291/5604/1870/5915/6774/1956/11186/1026/369/4616/7039/1029/578/5293/8503/83593/6776/3718
hsa04370	VEGF signaling pathway	56	-0.53905185774253	-1.48698289888093	0.00657246536435947	0.0181709336544056	0.00976713119161779	6568	tags=61%, list=32%, signal=41%	4893/998/8681/7867/208/5578/5747/207/5595/5295/9047/5594/5894/7422/5533/1432/3791/5579/5290/6714/8605/5829/9261/5336/5291/5600/5604/4846/5603/8877/4773/5293/8503/5880
hsa05220	Chronic myeloid leukemia	76	-0.541163557064692	-1.5337159119008	0.000607125021155964	0.00219499046110233	0.00117983809779297	6810	tags=59%, list=33%, signal=40%	5781/4088/4893/6777/1399/581/208/1643/1869/1647/207/5595/5295/867/51426/5594/5894/5925/6464/3551/5290/9846/5970/3065/613/10912/2885/5291/5604/1870/4609/4792/8517/1026/369/4616/4790/7048/1029/578/5293/8503/6776/861/7040
hsa01521	EGFR tyrosine kinase inhibitor resistance	78	-0.541503562732986	-1.53827619619577	0.000875596492788212	0.00303232890660339	0.00162991923311268	5319	tags=50%, list=26%, signal=37%	207/5595/5728/5295/5594/5154/3569/5894/2064/7422/6199/3791/6464/5155/5579/5290/10018/5156/6714/3082/5159/5336/2885/5291/5604/9542/558/6774/1956/2621/2475/369/3716/3717/2065/7039/5293/8503/3570
hsa05214	Glioma	73	-0.543562758381002	-1.53490981763075	0.00137300133246043	0.00447244988494537	0.00240400441743984	6223	tags=56%, list=30%, signal=39%	581/57118/208/5578/1643/1869/1647/207/5595/5728/5295/51426/5594/5154/5894/818/5925/6464/5155/5579/5290/5156/5159/10912/5336/2885/5291/8536/5604/1870/1956/2475/1026/369/4616/7039/1029/578/5293/8503/51806
hsa04670	Leukocyte transendothelial migration	103	-0.543763584895642	-1.57241932714048	0.00012264766452376	0.000476161521092244	0.000255943482781945	3956	tags=46%, list=19%, signal=37%	1366/87/7408/83692/2771/1432/4313/5579/5290/4267/7410/5829/5336/9564/5908/1003/5291/5600/137075/3702/399/7412/2185/6387/5603/4478/1535/5293/6494/10411/8503/83593/10451/5175/3676/9071/653361/4688/5880/3383/4689/3683/4318/3684/7409/3689/1536
hsa00562	Inositol phosphate metabolism	71	-0.548162418017416	-1.54544648943874	0.0013526734762488	0.00445029573685855	0.00239209625273472	5124	tags=52%, list=25%, signal=39%	3706/5728/3633/3628/27124/253430/3631/55300/64419/79837/5298/5290/3612/80271/23396/113026/4952/51763/55361/3707/5336/8821/8776/5291/8867/8871/3636/4534/5331/5287/64768/5297/5305/5293/5294/5330/3635
hsa04931	Insulin resistance	98	-0.548707967943542	-1.58178761675362	0.000320550130571579	0.00119842037452329	0.000644167726507478	5855	tags=63%, list=29%, signal=45%	6513/64764/2673/11001/79660/9882/5170/207/5601/2308/5499/5728/3643/5295/11000/3569/1375/200186/6197/7132/5836/6199/5564/2997/5834/5562/5465/3551/5579/5290/8473/133522/5970/51422/9945/5509/5580/6945/22877/5291/10062/7124/90993/5106/1374/5588/4846/6774/5792/4792/57761/2475/9021/5105/6196/10999/5770/4790/6720/6195/5293/8503
hsa05120	Epithelial cell signaling in Helicobacter pylori infection	68	-0.551159298788569	-1.54695475353923	0.00272430038446201	0.00822288831640369	0.00441991757208709	5256	tags=53%, list=26%, signal=40%	8992/5601/3725/523/102/6868/5058/529/1432/3551/3579/6714/5970/836/1445/5336/533/5600/1956/9114/10392/3576/9020/4792/528/8517/537/526/245973/4790/2919/5603/1839/4067/10312/6352
hsa04750	Inflammatory mediator regulation of TRP channels	87	-0.554989842456403	-1.58992137909133	0.000123020453777632	0.000476161521092244	0.000255943482781945	3434	tags=40%, list=17%, signal=34%	3269/5579/5290/6714/8605/624/5580/5336/5734/5291/5600/3554/112/5588/3709/3708/5331/5029/5583/115/3710/5606/196883/5603/109/1573/5293/59341/8503/113/51393/51806/5732/5330/3553
hsa05160	Hepatitis C	136	-0.559277422371106	-1.64109076920297	4.32919260283098e-06	2.2608005814784e-05	1.2152119586894e-05	5321	tags=58%, list=26%, signal=43%	3661/207/5595/1499/7122/5295/317/10197/57506/1364/5594/8737/5894/637/5925/1366/7132/5519/8837/7534/3458/5465/3551/5290/5522/7187/5970/8772/836/29110/10379/2885/6256/5291/8717/5604/10062/7124/1870/7186/6041/6774/4609/1956/7297/3454/4792/137075/8517/7533/355/1026/949/9021/369/23586/3455/3716/6772/4790/6773/3665/3949/578/5293/356/148022/7098/8503/4600/9641/3434/9071/91543/4938/4940/4939/4599/3627
hsa00561	Glycerolipid metabolism	43	-0.559488349750934	-1.50130253366784	0.00818794193243086	0.0217244588368529	0.0116772007185771	6982	tags=58%, list=34%, signal=38%	8527/4023/1606/160851/231/23175/80168/84649/80339/219/10327/9663/154141/8694/3990/57016/10555/2710/217/2717/11343/8525/1609/64900/56894
hsa04070	Phosphatidylinositol signaling system	89	-0.5598720353958	-1.60481390186341	0.000101455220392026	0.000411655306209521	0.000221270489339944	5124	tags=51%, list=25%, signal=38%	3706/5728/5295/3633/3628/253430/3631/55300/64419/79837/5298/5579/5290/3612/80271/23396/113026/9807/4952/55361/3707/5336/8821/8776/5291/8867/3709/8871/3708/3636/4534/9677/5331/8525/5287/64768/3710/1609/5297/5305/5293/8503/51806/5330/3635
hsa04933	AGE-RAGE signaling pathway in diabetic complications	99	-0.561227640937853	-1.6189031062023	8.50605701584713e-05	0.000358781122847911	0.000192849875662931	3715	tags=41%, list=18%, signal=34%	1432/4313/5579/5290/5970/113026/1278/836/1281/5580/5336/5291/5600/1277/7124/4846/6774/3576/5331/1729/7412/6772/3717/4790/2152/5603/7048/6347/7056/4772/1958/5293/8503/6776/5054/7040/2335/5330/3553/3383/1536
hsa04978	Mineral absorption	53	-0.564438031248119	-1.547507050006	0.00223690759684774	0.00695443778422907	0.00373810765557666	4352	tags=51%, list=21%, signal=40%	6546/476/113235/538/9843/54822/7779/4493/483/491/4499/115019/261729/65010/79901/4502/2495/1317/26872/478/30061/4496/6523/7421/4495/10568/3162
hsa04917	Prolactin signaling pathway	63	-0.564936218430507	-1.5747435395015	0.00105867846967233	0.0035541348624714	0.00191039723850647	5319	tags=48%, list=26%, signal=35%	207/5595/5601/5295/5594/5894/1432/6464/5290/6714/5970/2885/5291/5600/5604/6774/1154/2099/9021/6772/3717/4790/8651/5603/2353/8792/5293/8503/6776/3659
hsa04218	Cellular senescence	152	-0.565650401321627	-1.6669195123632	2.26639952704309e-07	1.35571898981305e-06	7.28717934054047e-07	5456	tags=50%, list=27%, signal=37%	1869/1647/207/5595/824/2308/10114/5499/5728/5295/4605/5481/9134/545/7416/5594/3569/5894/3364/5925/3135/5533/5934/1432/4683/54822/204851/4776/5290/23291/8900/5970/292/9261/10912/5291/5600/5604/1870/3709/3805/4609/3486/3708/3576/823/2475/1026/896/2113/3710/22808/5606/4616/898/678/4790/5603/7048/4773/4772/1029/8878/1030/5293/59341/8503/83593/3105/5054/3133/51806/7040/3134/3107/3106
hsa05212	Pancreatic cancer	76	-0.568142908715742	-1.61017830553355	0.000102601018568938	0.000411655306209521	0.000221270489339944	5753	tags=59%, list=28%, signal=43%	5338/1643/1869/1647/207/5595/5601/5295/51426/5594/5894/5888/2064/5925/5899/7422/6199/3551/5290/5337/5900/5970/10912/5291/5604/1870/6774/1956/2475/8517/1026/369/3716/4616/6772/4790/7048/7039/1029/578/5293/8503/9459/7040/5880
hsa01522	Endocrine resistance	93	-0.57833881841279	-1.66092708485949	1.65848151635906e-05	8.26727907397168e-05	4.44377822565107e-05	5674	tags=57%, list=28%, signal=41%	5566/5747/3714/54567/1869/4855/207/5595/5601/3725/5295/5567/5594/5894/6667/10498/2064/5925/5469/2852/1432/6199/4313/638/6464/5290/6714/2885/5291/5600/5604/1870/1031/112/1956/4853/4851/2475/1026/2099/369/115/196883/5603/2353/8202/109/1839/1029/5293/8503/113/4318
hsa05146	Amoebiasis	90	-0.580979243156831	-1.66594054482897	2.99450719166252e-05	0.000140741838008138	7.56507079998953e-05	3675	tags=59%, list=18%, signal=49%	5578/5566/5747/5052/7414/2767/910/5295/81/5567/3569/3918/5272/87/3911/5869/3458/5579/5290/5970/1278/836/1281/5878/5291/1277/3554/7124/3913/909/3576/911/3910/5331/912/913/3586/3592/4790/2919/5293/338382/8503/7040/2335/5330/7099/3553/2769/7097/3684/929/3689
hsa05170	Human immunodeficiency virus 1 infection	189	-0.583237841897788	-1.73424824987422	2.57945900666486e-10	2.23326845577037e-09	1.20041305573323e-09	5324	tags=52%, list=26%, signal=39%	55970/3661/207/5595/5601/811/3725/10053/5295/8906/545/5594/5058/8737/23118/164/5894/637/7132/3135/5533/2771/1642/1432/6199/51135/2923/3551/5579/4776/5290/23291/5970/8772/5829/836/29110/5336/5291/8717/5600/5604/7124/3984/27350/3709/7186/3708/200316/3985/4792/200315/2475/6892/2793/8517/355/9582/3710/5606/54331/2185/4790/4615/5603/917/2353/4773/4772/164668/578/5293/356/919/162/8503/684/3105/6891/593…
hsa04611	Platelet activation	111	-0.584980350555341	-1.70219832100226	1.92041105628934e-06	1.06588023284435e-05	5.72925545089907e-06	5319	tags=59%, list=26%, signal=44%	2149/207/5595/5499/5906/5295/60/23365/5567/5594/3688/6915/9002/10125/7408/2771/1432/5290/5023/83660/9138/6714/5584/8605/1278/4638/1281/5336/5739/5908/5742/5291/5600/1277/8773/7094/112/3709/4846/3690/84876/3708/146850/5331/115/3710/7450/196883/5603/6786/109/64805/5293/8503/113/5294/4067/23533/6916/695/5330/2207/3937/2212/83706/54518
hsa00520	Amino sugar and nucleotide sugar metabolism	46	-0.588268539325893	-1.58316307838768	0.00234925907818414	0.00722342277310824	0.00388269085228662	5869	tags=67%, list=29%, signal=48%	3099/8790/29926/2673/1118/2582/10007/606495/2762/5373/2821/2585/3073/55276/64841/54187/5372/3098/51167/9945/55577/2584/29925/51005/51706/5236/3074/91373/80896/3101/5973
hsa04666	Fc gamma R-mediated phagocytosis	91	-0.594657658249783	-1.70610595720213	3.68448420994062e-06	1.95515371785559e-05	1.05092249112059e-05	6323	tags=66%, list=31%, signal=46%	998/1399/8681/4082/10552/208/274/5578/5338/10109/207/5595/5295/10097/8853/50807/5594/5058/273/5894/81873/7408/85477/6199/5579/5290/5337/9846/7410/23396/8605/5580/5336/5291/10163/5604/3984/3636/3985/1785/2934/2215/55616/8877/10095/5293/8503/10451/4067/653361/2213/2209/5880/3635/7454/5788/2212/3055/2214/7409
hsa05163	Human cytomegalovirus infection	203	-0.598050309617862	-1.78218112629101	1e-10	9.67647058823529e-10	5.20123839009288e-10	4166	tags=50%, list=20%, signal=40%	5894/637/6667/5925/7422/7132/3135/5533/2771/1432/6199/2923/3551/5579/4776/5290/5156/3579/11214/9138/6714/5970/8772/5829/836/29110/3588/9564/5734/2885/5291/8717/5600/2002/5604/3554/7124/1870/90993/2768/112/3709/7186/5733/3690/6774/4609/1956/3708/3576/4792/2475/5331/6892/2793/8517/355/1026/115/3710/6376/54331/3716/2185/3685/196883/4790/6387/5603/4773/109/6347/4772/1029/578/5293/356/8503/3105/6891/5…
hsa04936	Alcoholic liver disease	120	-0.600010681189158	-1.75265432887867	3.64079193701411e-08	2.303501052457e-07	1.23816405955136e-07	4747	tags=54%, list=23%, signal=42%	6932/37/3569/1375/31/8737/23118/219/2194/7132/1432/8310/5564/114609/51135/10645/5562/9663/5465/3551/7187/5970/51422/8772/836/29110/8717/5600/6319/7124/1374/4217/3576/9020/4792/217/8517/355/84818/5606/64900/3592/4790/4615/2919/5603/6720/23765/356/148022/23643/9641/717/721/3654/720/728/7099/3553/929/712/718/719/713/714
hsa05161	Hepatitis B	148	-0.604236199350051	-1.77787614482018	1.23289610000488e-09	9.21870038412743e-09	4.95518049762728e-09	5321	tags=59%, list=26%, signal=44%	3661/207/5595/5601/3725/5295/317/9134/57506/5594/3569/23118/5894/637/5925/1642/1432/114609/51135/7534/3551/5579/4776/5290/8900/7187/6714/5970/8772/836/29110/2885/5291/5600/2002/5604/7124/1870/90993/1654/6774/4609/7297/3454/3576/4792/1960/6775/6778/8517/355/1026/537/369/843/23586/5606/3716/2185/6772/898/3717/4790/4615/6773/5603/7048/2353/4773/3665/4772/3339/64135/1959/5293/356/148022/7098/8503/677…
hsa05143	African trypanosomiasis	33	-0.605166617935845	-1.58058490718591	0.0066301024553675	0.0181775308984659	0.00977067730264684	1836	tags=42%, list=9%, signal=39%	3910/5331/3606/355/3586/7412/3592/4615/356/5330/3553/3383/8542/3620
hsa00590	Arachidonic acid metabolism	46	-0.607995052115568	-1.63625156540714	0.000767260391735187	0.00268541137107315	0.00144344620169666	3017	tags=37%, list=15%, signal=32%	8605/151056/5742/2678/247/5740/873/26279/9536/2687/1573/27306/874/5730/6916/2878/240
hsa05221	Acute myeloid leukemia	66	-0.608567850053208	-1.70183769471703	6.35758660487526e-05	0.000275216578026837	0.000147932763105131	4166	tags=48%, list=20%, signal=39%	5894/8864/6199/5914/3551/5290/8900/5970/2885/5291/7704/5604/6774/4609/5467/2475/8517/369/4790/5371/597/5293/8503/6776/11040/861/1050/2209/6688/3684/929/1436
hsa04210	Apoptosis	132	-0.609165530844796	-1.78862545332199	3.89183850138706e-09	2.72428695097094e-08	1.46434237006277e-08	5403	tags=60%, list=26%, signal=44%	1647/5170/5366/207/5595/5601/3725/824/5295/60/317/8797/331/5594/8795/8722/8737/5894/637/7132/8837/2081/27113/10376/3551/5290/10018/5970/8772/836/10912/5291/143/8717/5604/7124/1519/3709/7186/10039/3708/4217/153090/9020/4792/823/4170/4000/8517/355/1075/3710/843/840/9131/4616/1513/7185/84790/4790/2353/597/1512/1508/578/5293/356/7277/8503/1514/3002/1522/330/1509/5551/1521/8743/1439/1520
hsa05167	Kaposi sarcoma-associated herpesvirus infection	177	-0.610117422575052	-1.80924397590678	1e-10	9.67647058823529e-10	5.20123839009288e-10	4166	tags=51%, list=20%, signal=41%	5894/637/5925/7422/7132/3135/5533/1432/5155/3551/4776/5290/7187/6714/5970/8772/836/29110/9261/7316/5336/10379/1237/5291/8717/5600/5604/100507436/1870/3709/7186/1233/6774/4609/7314/3708/7297/3454/3576/8678/146850/4792/3459/2475/2793/8517/355/1026/131450/3710/3455/54331/3716/6772/9976/3717/4790/6773/2919/5603/2353/4773/3665/4772/578/5293/148022/7098/1827/8503/3105/59345/7538/9641/57580/4277/5294/40…
hsa05417	Lipid and atherosclerosis	189	-0.610286891053412	-1.81467815820503	1e-10	9.67647058823529e-10	5.20123839009288e-10	3715	tags=47%, list=18%, signal=38%	1432/2081/114609/51135/3551/5290/6403/7187/9138/6714/5970/7410/836/29110/5452/5908/6256/5291/5600/7124/7186/4846/6774/959/3708/4217/3576/4792/5468/5331/3606/8517/19/355/3310/5606/840/7412/29108/3717/3592/4790/4615/3312/2919/5603/1535/2353/4773/3665/3949/6347/25833/6648/4772/10333/1573/5293/356/148022/8503/10451/23643/114548/9641/958/9619/4067/3654/414062/51806/653361/8743/834/5330/4688/7099/6348/…
hsa04217	Necroptosis	116	-0.610809719297425	-1.78120133499836	6.79110897421454e-08	4.13754602317886e-07	2.22398890383634e-07	5254	tags=59%, list=26%, signal=45%	5601/824/9525/8797/81858/5481/128866/331/7416/8795/8737/2747/637/818/7132/79643/5836/8837/5834/54822/3458/25978/2752/90865/8772/8605/292/10379/8717/7124/3460/7186/1540/6774/92421/7297/3454/823/6775/3459/6778/355/2495/55072/3455/3716/9131/6609/6772/29108/3717/6773/7128/8878/197259/356/148022/7098/81030/6776/114548/330/3718/11035/8743/834/7099/3553/1536
hsa04664	Fc epsilon RI signaling pathway	60	-0.613632835417016	-1.69520179131968	0.000187946019468621	0.000719002795409027	0.000386474066961179	3374	tags=42%, list=16%, signal=35%	5290/9846/7410/8605/5336/2885/5291/5600/5604/7124/2205/5606/5603/5293/8503/10451/4067/695/2207/5880/3635/3937/240/7409/241
hsa04657	IL-17 signaling pathway	83	-0.615883386579238	-1.75726848591482	1.94385452798361e-06	1.06588023284435e-05	5.72925545089907e-06	4651	tags=57%, list=23%, signal=44%	5594/3569/6372/23118/27189/132014/9618/1432/3458/3551/6361/7187/5970/8772/836/29110/8061/8717/5600/7124/7186/29761/4322/3576/4792/8517/6354/84818/1051/6356/727897/6278/4790/2919/5603/2353/7128/2354/6347/23765/6279/9641/3553/6280/3934/4318/3627
hsa05219	Bladder cancer	41	-0.617063105475635	-1.64798277883918	0.00180324191789323	0.00581633912732228	0.00312636369665699	4166	tags=51%, list=20%, signal=41%	5894/2064/5925/7422/4313/1612/6714/5604/1870/4609/1956/3576/11186/7057/1026/369/23604/1839/1029/4318/1890
hsa05135	Yersinia infection	133	-0.617308404664955	-1.81135542593258	1.29782511452477e-09	9.48854361508113e-09	5.10022501146578e-09	5321	tags=62%, list=26%, signal=47%	3661/207/5595/5601/3725/5295/60/10097/4210/23365/5594/3688/3569/6197/23118/81873/64283/63916/1432/51135/3551/5290/9138/6714/5970/7410/23396/5829/29110/926/9564/5291/391/10163/5600/5604/7124/3984/7186/3576/4792/3606/8517/9815/58484/5606/3586/6196/2185/29108/4790/4615/5603/9844/7535/2353/4773/6347/4772/8935/6195/3932/10095/5293/148022/8503/7456/10451/114548/3678/3676/3654/925/2335/834/7099/3553/588…
hsa04630	JAK-STAT signaling pathway	130	-0.621438745427271	-1.82203423817264	7.57401887444305e-10	5.93298145164706e-09	3.18906057871286e-09	3499	tags=45%, list=17%, signal=37%	3574/5777/3458/5155/5290/5156/5159/3588/10379/2885/5291/3460/6774/4609/1956/7297/3454/6775/3459/2475/1154/4170/53832/6778/1026/896/9021/3455/3586/3716/6772/3717/3976/3592/6773/8651/3597/3600/5293/3559/9466/8503/50615/6776/3570/9180/3575/3718/3594/1439/1441/3566/5008/3601/3561/1438/3587/3560
hsa05166	Human T-cell leukemia virus 1 infection	213	-0.627320299402591	-1.8722227664985	1e-10	9.67647058823529e-10	5.20123839009288e-10	3416	tags=43%, list=17%, signal=36%	3551/4776/5290/83660/8900/5970/29882/4488/2005/292/4791/8061/4215/8379/5291/2002/5604/3554/7124/1870/90993/1031/7094/64784/112/706/4609/9020/4792/5971/8517/1026/8850/896/8829/115/2113/2114/3716/898/196883/4790/4049/7048/917/2353/4773/109/4772/1029/3600/1030/1959/3932/1958/5293/3559/8503/3105/6776/7538/113/958/3718/4316/3109/3133/915/7040/3134/3107/3108/567/3106/916/3601/3383/3561/3115/920/3683/66…
hsa04979	Cholesterol metabolism	41	-0.628232622084119	-1.67781306824621	0.00105436466453429	0.0035541348624714	0.00191039723850647	2993	tags=46%, list=15%, signal=40%	3990/1593/6272/706/5360/4864/344/19/57552/6646/114879/949/51129/4035/3949/26119/3988/341/348
hsa04142	Lysosome	129	-0.631782720113356	-1.85403871290807	1.57887059853505e-10	1.40391466734603e-09	7.54623785359566e-10	5824	tags=69%, list=28%, signal=50%	1212/2519/10239/8907/51172/427/8218/10053/4758/8906/23163/23335/8372/4891/26088/6448/5538/10717/8722/164/175/3425/1497/1201/23312/8943/2588/3073/23062/2990/3373/4126/57192/1510/4669/6272/4074/950/533/3423/2720/411/1519/23431/55353/53/3920/9114/23457/2517/135112/4864/9516/2717/2760/79158/5641/1075/2799/1200/537/2548/2629/4668/6609/1513/1777/3074/3482/23659/968/4125/1512/410/1508/5660/162/3988/5476…
hsa04660	T cell receptor signaling pathway	97	-0.633772052300662	-1.82553952938438	2.93389374466557e-08	1.89264910195092e-07	1.01732538514719e-07	5399	tags=64%, list=26%, signal=47%	5170/207/5595/5601/3725/868/5295/4793/5594/1326/5058/5894/10125/5533/4690/1432/5777/3458/3551/5290/940/5970/7410/8915/926/9402/2885/5291/5600/5604/7124/5588/4794/959/9020/4792/3702/8517/3586/29851/4790/5603/1493/917/7535/2353/4773/4772/3932/5293/919/8503/10451/5133/915/925/84433/916/3937/920/5788/7409
hsa04216	Ferroptosis	39	-0.639068750788905	-1.7010370019445	0.000673831857693639	0.00240968131718704	0.00129523743812965	4871	tags=54%, list=24%, signal=41%	5093/4891/2182/64116/6520/8031/2937/5621/2730/10533/23516/7037/2495/30061/2180/6303/1356/55240/51703/3162/1536
hsa04668	TNF signaling pathway	109	-0.640014805453128	-1.85936925692016	1.56198182387393e-09	1.11715656533592e-08	6.00487291557942e-09	4668	tags=60%, list=23%, signal=46%	8809/5594/1326/3569/6372/8737/23118/7132/83737/1432/8837/3551/5290/7187/5970/8772/836/5291/8717/5600/5604/7124/90993/7186/4217/153090/9020/4792/8517/355/4323/9021/843/6376/1051/5606/840/7412/7185/3976/4790/4049/2919/5603/2353/7128/8986/6347/3600/197259/5293/602/8503/3726/64127/330/11035/3659/3553/3383/6352/7133/4318/1435/3627
hsa01523	Antifolate resistance	29	-0.644590771119827	-1.64659803263909	0.00310684288951617	0.00912635098795374	0.00490554140449921	4842	tags=59%, list=24%, signal=45%	2356/239/3569/10057/113235/3551/6573/5970/2618/7124/10257/4524/8517/4790/8714/2350/3553
hsa04622	RIG-I-like receptor signaling pathway	52	-0.645290464781572	-1.76809691468308	6.58996925833746e-05	0.000281571413765328	0.000151348576268037	5321	tags=67%, list=26%, signal=50%	3661/7706/5601/57506/4793/8737/1432/3551/7187/5970/8772/79671/29110/8717/5600/7124/1654/7186/1540/54941/3576/55593/4792/8517/843/23586/3592/4790/9636/5603/3665/64135/79132/9641/3627
hsa04625	C-type lectin receptor signaling pathway	98	-0.646569916538165	-1.86389909951285	6.73258084450714e-09	4.61462312050593e-08	2.48042452166052e-08	3416	tags=67%, list=17%, signal=56%	8844/207/5595/5601/3725/868/5295/23365/5594/5058/3569/5894/5533/1432/3551/4776/5290/6361/6714/5970/8915/4791/9261/5580/5336/6367/10379/5291/5600/7124/3709/1540/3708/9020/4792/1960/5971/8517/3710/22808/3586/6772/29108/3592/4790/6773/1263/5603/26253/4773/4772/1959/30835/5293/602/8503/64170/114548/9641/51806/3659/834/3553/2207/4046/64581
hsa04621	NOD-like receptor signaling pathway	156	-0.64964492594007	-1.91752776082615	1e-10	9.67647058823529e-10	5.20123839009288e-10	3597	tags=53%, list=18%, signal=44%	51135/54822/7158/3551/10135/7187/8767/5970/8772/79671/820/29110/5580/837/10379/5600/55669/7124/84168/3709/7186/6041/9927/79184/3708/7297/10392/114769/3454/3576/199713/118429/4792/5331/3606/10628/8517/58484/55072/3710/3455/3716/6772/29108/4790/79792/4615/6773/2919/5603/1535/3665/7128/6347/9447/1508/9051/148022/3428/64127/64170/84674/114548/9641/330/2633/5027/51393/11035/2634/834/4938/5330/7099/355…
hsa05235	PD-L1 expression and PD-1 checkpoint pathway in cancer	88	-0.653279213796701	-1.87165671730853	1.62082500388322e-08	1.08826821689302e-07	5.84959399897702e-08	3951	tags=58%, list=19%, signal=47%	10125/5533/1432/6199/114609/5777/3458/3551/5290/940/5970/55509/4215/5291/5600/5604/3460/5588/6774/1956/4794/4792/3459/2475/8517/5606/3716/6772/3717/4790/4615/5603/917/7535/29126/2353/4773/4772/3932/5293/148022/919/8503/5133/116071/915/10538/7099/916/7097/920
hsa04623	Cytosolic DNA-sensing pathway	46	-0.654562992254247	-1.7615763763321	4.16276059671403e-05	0.000190215032822072	0.000102243242726309	3416	tags=59%, list=17%, signal=49%	57506/4793/3569/8737/171568/3551/90865/5970/29110/103/4792/3606/8517/23586/29108/4790/3665/9447/81030/9641/11035/834/3553/388372/6351/6352/3627
hsa04062	Chemokine signaling pathway	179	-0.656144792321422	-1.94615495112459	1e-10	9.67647058823529e-10	5.20123839009288e-10	3479	tags=50%, list=17%, signal=42%	6464/3551/5579/5290/6361/3579/6714/5970/6363/7410/7074/5829/5580/5336/9564/409/5908/6367/1237/6370/2885/5291/5604/112/1233/6774/56477/3576/146850/4792/3702/5331/2793/8517/6369/6354/6357/115/6376/6356/54331/2185/6772/196883/58191/3717/4790/6387/6773/2919/9844/1236/109/6347/5293/10563/8503/10451/729230/10663/6846/59345/113/408/57580/3718/5294/4067/414062/23533/6355/2268/653361/6373/1794/5330/6348/3…
hsa04060	Cytokine-cytokine receptor interaction	236	-0.6567172486084	-1.96798977858831	1e-10	9.67647058823529e-10	5.20123839009288e-10	2665	tags=45%, list=13%, signal=40%	6367/1237/6370/3554/8718/7124/3460/146433/9518/970/9573/1233/56477/27242/959/3454/3576/3604/4982/3625/608/3459/3606/53832/355/6369/6354/6357/84818/84957/6376/3455/6356/3586/7293/8744/8742/9235/4050/94/58191/3976/3592/4049/6387/2919/7048/1236/6347/8741/23765/8792/8740/3597/3600/356/10563/3559/3557/9466/3603/729230/944/10663/6846/50615/3570/9180/958/3575/939/414062/10148/6355/10673/8764/8784/7040/3…
hsa04514	Cell adhesion molecules	132	-0.660552496004942	-1.93950732237151	1e-10	9.67647058823529e-10	5.20123839009288e-10	2158	tags=44%, list=11%, signal=40%	959/5792/201633/6385/137075/1462/23114/941/3385/6382/7412/3685/29851/3897/965/1493/29126/3680/3696/923/9672/3105/6402/5175/6693/958/5133/3676/3109/9071/3133/80380/925/3134/3695/3107/3108/3106/3383/3115/920/5788/942/914/3683/79679/3119/3118/3122/3123/3684/3111/3117/3127/6614/6404/3689/3113
hsa05145	Toxoplasmosis	107	-0.661811827369183	-1.9187185196292	1e-10	9.67647058823529e-10	5.20123839009288e-10	2641	tags=56%, list=13%, signal=49%	7132/2771/1432/3911/51135/3458/3551/5970/836/3588/10105/5600/7124/3460/3913/6774/959/7297/146850/4792/3459/3910/8517/3310/5606/3586/3716/6772/3717/3592/4790/4615/3312/8651/5603/3949/23643/330/958/5294/3109/3654/23533/7040/3108/7099/1234/3115/7097/3119/3118/3122/240/3123/3111/3587/3117/4261/3127/3113
hsa05142	Chagas disease	98	-0.663873356580251	-1.91378058253266	4.52631047247863e-10	3.72289036361367e-09	2.0011056825695e-09	3937	tags=57%, list=19%, signal=46%	7132/5519/2771/1432/8837/51135/3458/3551/5290/5522/5970/8772/624/5291/5600/7124/3460/3576/4792/3459/5331/8517/355/3586/1636/3592/4790/4615/5603/7048/917/2353/6347/10333/5293/356/148022/919/8503/5054/3654/414062/915/7040/5330/7099/6348/3553/916/2769/7097/6352/712/718/713/714
hsa05162	Measles	122	-0.667519729185618	-1.95264608348333	1e-10	9.67647058823529e-10	5.20123839009288e-10	3613	tags=53%, list=18%, signal=44%	27113/51135/3551/5290/7187/940/5970/8772/9367/836/29110/103/4179/10379/5291/8717/6774/7297/3454/4792/6504/8517/355/896/3310/23586/3455/3716/6772/898/3592/4790/4615/3312/6773/4478/917/2353/3665/7128/64135/578/30835/5293/356/3559/8503/4600/6776/9641/3718/3654/915/4938/2213/7099/3553/4940/51284/916/3561/4939/7097/4599/3560
hsa05134	Legionellosis	56	-0.672049281961981	-1.85385835356862	1.0292253518959e-06	5.94061650480265e-06	3.19316452665764e-06	3155	tags=50%, list=15%, signal=42%	5970/81876/4791/836/7415/7124/51128/7100/3576/4792/3606/58484/3310/840/29108/3592/4790/4615/3312/2919/834/7099/3553/7097/3684/929/718/3689
hsa04650	Natural killer cell mediated cytotoxicity	101	-0.673467230886138	-1.94364551612981	1e-10	9.67647058823529e-10	5.20123839009288e-10	4166	tags=59%, list=20%, signal=48%	5894/637/117157/3135/5533/3821/5777/6464/3458/5579/5290/7410/6452/836/5336/2885/51744/5291/5604/100507436/7124/3460/80328/3454/259197/3459/2215/355/4068/369/3455/2185/7535/10870/4773/4772/3932/5293/356/919/8503/10451/3105/3002/4277/3133/5551/3107/8743/7305/3106/2207/5880/962/3383/3937/3683/2214/7409/3689
hsa05169	Epstein-Barr virus infection	184	-0.675498609290882	-2.005776135022	1e-10	9.67647058823529e-10	5.20123839009288e-10	3715	tags=55%, list=18%, signal=46%	1432/8819/51135/2923/5709/3551/5290/10018/4734/8900/7187/5970/5708/3065/8772/4791/836/29110/10912/5336/10379/5291/8717/5600/930/7124/1870/953/7186/79685/6774/4609/4794/7297/9612/3454/9020/4792/5971/6892/956/8517/355/1026/896/23586/29760/3455/5606/3716/4616/6772/898/965/4790/4615/6773/9636/5603/917/3665/7128/578/960/5293/919/8503/3105/6891/9641/958/3718/3109/4067/3654/3133/915/3134/6890/3107/695/4…
hsa04064	NF-kappa B signaling pathway	102	-0.680415604952561	-1.96646493074616	1e-10	9.67647058823529e-10	5.20123839009288e-10	3765	tags=58%, list=18%, signal=47%	79092/8837/114609/51135/3551/5579/7187/5970/6363/8915/4791/10912/5336/8717/3554/7124/5588/7186/1540/959/3576/9020/4792/5971/8517/6357/23586/29760/7412/4616/4050/7185/4790/4049/6387/4615/2919/7535/597/7128/8792/8740/3932/148022/23643/330/958/4067/3654/10673/84433/695/5328/7099/3553/388372/3383/6351/929
hsa05164	Influenza A	148	-0.683546207681439	-2.01123417932644	1e-10	9.67647058823529e-10	5.20123839009288e-10	3458	tags=57%, list=17%, signal=48%	3458/3551/5579/5290/3337/7187/90865/10241/5970/8772/79671/292/836/29110/23430/103/10379/5291/8717/5604/7124/3460/23633/6041/64499/7297/3454/3576/4792/7177/3459/3606/8517/355/896/9021/23586/3455/3716/6772/29108/3717/3592/4790/4615/6773/5371/3665/6347/64135/578/5293/356/148022/7098/8503/4600/114548/9641/3109/91543/56649/8743/834/4938/3108/7099/3553/4940/51284/3383/4939/3115/6352/4599/3119/3118/3122…
hsa04662	B cell receptor signaling pathway	78	-0.686694951202511	-1.95072861968133	3.96618158644445e-10	3.34583010753904e-09	1.79843051693028e-09	3607	tags=60%, list=18%, signal=50%	23547/5777/3551/5579/5290/974/5970/7410/8915/5336/2885/5291/5604/930/353514/25780/4794/3636/4792/79168/8517/29760/11024/11025/971/4790/8519/2353/4773/11027/4772/5293/27071/8503/10451/973/4067/118788/10288/84433/695/10859/2213/5880/3635/11006/7409
hsa00511	Other glycan degradation	16	-0.694271610404589	-1.58033731178172	0.0152566228946914	0.0374584248683094	0.020134427700771	5791	tags=94%, list=28%, signal=67%	2519/4758/10825/175/57704/3073/4123/4126/2720/2517/64772/2629/23324/3074/4125
hsa04613	Neutrophil extracellular trap formation	102	-0.694956451684394	-2.00848934193452	1e-10	9.67647058823529e-10	5.20123839009288e-10	3462	tags=55%, list=17%, signal=46%	2358/5579/5290/6403/1184/6714/5970/3065/820/9734/292/5336/837/10105/5291/5600/5604/10533/79885/51564/3690/2475/5331/2215/366/7450/4790/79792/5603/1535/5293/8503/51311/653361/728/834/5330/4688/7099/2209/51284/5880/27180/4689/7097/2357/3683/2212/64581/3684/2359/718/6404/2214/3689/1536
hsa05144	Malaria	46	-0.696418544638431	-1.87421909089253	1.15964342481829e-06	6.57797735802098e-06	3.53575490688698e-06	3458	tags=63%, list=17%, signal=53%	3458/6403/3082/2532/7124/2995/959/3576/7057/3606/3586/6382/7412/3820/3592/4615/4035/6347/5175/7058/958/1311/7040/7099/3553/3383/7097/3683/3689
hsa05152	Tuberculosis	159	-0.69964977759687	-2.06493890869287	1e-10	9.67647058823529e-10	5.20123839009288e-10	3193	tags=51%, list=16%, signal=43%	6714/8767/5970/8772/820/8915/836/3588/22925/533/5878/8717/5600/7124/3460/3920/9114/5993/3459/3606/2215/537/843/1051/3586/3716/6772/3717/3592/4790/4615/1263/5603/8877/26253/9902/10333/30835/3656/64127/64170/7421/1509/3109/3654/4360/7096/51806/9103/7040/3108/2213/7099/3553/2207/10312/2209/4046/11151/3687/3115/7097/2212/64581/3119/3118/3122/3123/3684/3111/3587/1520/972/3117/4261/929/3127/718/2214/36…
hsa05133	Pertussis	72	-0.700124157864344	-1.97462992819978	6.2356937505436e-10	5.00376400958255e-09	2.68959319664012e-09	1505	tags=57%, list=7%, signal=53%	2771/1432/114609/51135/5970/836/715/5600/7124/10392/3576/716/3586/840/29108/3592/4790/4615/5603/2353/148022/23643/114548/3678/717/721/3654/720/51806/3659/3394/834/7099/3553/3684/929/712/718/713/3689/714
hsa00533	Glycosaminoglycan biosynthesis - keratan sulfate	14	-0.702273699587314	-1.56933208895538	0.011830769517695	0.0299409474717049	0.016093678372249	3059	tags=57%, list=15%, signal=49%	8534/10678/9435/10164/4166/2683/6482/93010
hsa04620	Toll-like receptor signaling pathway	88	-0.706918094296065	-2.02533307632213	1e-10	9.67647058823529e-10	5.20123839009288e-10	3715	tags=64%, list=18%, signal=52%	1432/114609/51135/3551/5290/7187/5970/8772/29110/5291/5600/5604/7124/7100/3454/3576/4792/941/8517/3455/5606/1513/6772/3592/4790/4615/5603/2353/3665/10333/5293/148022/7098/3663/8503/23643/51311/9641/958/3654/414062/7096/6373/7099/6348/3553/388372/51284/6351/7097/6696/6352/942/929/3627/4283
hsa00603	Glycosphingolipid biosynthesis - globo and isoglobo series	14	-0.713906759853228	-1.59532784357181	0.00764754537744534	0.02055824645259	0.0110503452376743	1905	tags=57%, list=9%, signal=52%	3073/2717/4668/3074/6482/26301/53947/2524
hsa04145	Phagosome	142	-0.714211748750643	-2.09698804280254	1e-10	9.67647058823529e-10	5.20123839009288e-10	2231	tags=53%, list=11%, signal=47%	715/3693/9341/22925/4074/533/5878/3690/3920/9114/2204/7057/528/81035/7037/2215/23673/537/949/526/245973/3685/84790/1535/9902/83547/10333/30835/7277/338382/1514/3105/6891/7058/8685/3678/1311/3109/3133/4360/9103/653361/3134/6890/3107/3108/3106/2213/4688/7099/10312/2209/11151/4689/3115/7097/4481/2212/64581/4973/3119/3118/3122/3123/3684/3111/1520/3117/929/3127/718/2214/3689/3113/1536
hsa04061	Viral protein interaction with cytokine and cytokine receptor	90	-0.722585620624369	-2.07199258267405	1e-10	9.67647058823529e-10	5.20123839009288e-10	2665	tags=53%, list=13%, signal=47%	6367/1237/6370/7124/146433/1233/56477/3576/3606/53832/6369/6354/6357/6376/6356/3586/4049/6387/2919/1236/6347/8740/10563/3559/729230/6846/3570/414062/6355/8764/6373/8743/6348/388372/1234/2833/1230/6351/3561/6352/7133/1524/3587/1435/3560/3627/4283/1436
hsa04610	Complement and coagulation cascades	68	-0.725108908444816	-2.03518415677252	1.38221635569158e-10	1.26319216950702e-09	6.789834729713e-10	3316	tags=51%, list=16%, signal=43%	10544/2157/624/715/4179/1604/1191/5345/3075/716/7450/2152/7056/629/2/5329/5054/1675/717/721/720/5104/2162/728/5328/3687/3684/712/718/719/11326/713/3689/714/5265
hsa04380	Osteoclast differentiation	124	-0.726478796512032	-2.12901142786396	1e-10	9.67647058823529e-10	5.20123839009288e-10	3937	tags=71%, list=19%, signal=58%	7132/2274/5533/1432/23547/3458/3551/5290/9846/5970/4791/8061/5336/4286/10379/2885/5291/5600/5604/3554/7124/3460/7186/1540/3690/353514/7297/3454/4982/9020/4792/79168/5468/3459/5971/2355/2215/8517/9021/29760/3455/3716/11024/10326/11025/1513/6772/4790/6773/8651/5603/7048/1535/2353/4773/2354/11027/4772/8792/8878/3932/5293/8503/55423/3726/140885/9103/7040/653361/10288/126014/695/10859/7305/2213/4688/3…
hsa00531	Glycosaminoglycan degradation	16	-0.728490907358289	-1.65822906329286	0.00547462726493362	0.0153944647022492	0.00827474026548672	4877	tags=88%, list=24%, signal=67%	8372/6448/3425/2588/3073/2990/3373/4669/3423/2720/411/2799/3074/10855
hsa04659	Th17 cell differentiation	98	-0.7352406178501	-2.11951451882185	1e-10	9.67647058823529e-10	5.20123839009288e-10	2585	tags=60%, list=13%, signal=53%	6256/5600/3554/3460/5588/6774/4794/7297/4792/196/2625/3459/2475/30009/6778/8517/3716/6772/3662/3717/4790/5603/7048/917/7535/2353/4773/4772/3932/919/3559/9466/50615/6776/3570/50943/3718/861/3109/915/10148/7040/3594/3108/3553/3566/916/3561/3115/920/3119/3118/3122/3123/3111/3117/3560/3127/3113
hsa04658	Th1 and Th2 cell differentiation	84	-0.746896688377215	-2.13216145083483	1e-10	9.67647058823529e-10	5.20123839009288e-10	2545	tags=60%, list=12%, signal=52%	5600/3460/5588/4853/4794/7297/4792/2625/4851/6775/3459/30009/6778/8517/4094/3716/6772/3717/3592/4790/5603/917/7535/2353/4773/4772/3932/919/3559/6776/3718/3109/915/3594/3108/3566/916/3561/3115/920/864/3119/3118/3122/3123/3111/3117/3560/3127/3113
hsa04612	Antigen processing and presentation	61	-0.753702372885642	-2.08557974581361	1e-10	9.67647058823529e-10	5.20123839009288e-10	1950	tags=52%, list=9%, signal=48%	5993/6892/5641/3310/3312/1508/1514/10437/3105/6891/3109/3133/925/3134/6890/3107/3108/567/3106/3115/920/3119/3118/3122/3123/3111/1520/972/3117/4261/3127/3113
hsa05140	Leishmaniasis	72	-0.761209605709226	-2.14691530378221	1e-10	9.67647058823529e-10	5.20123839009288e-10	2545	tags=62%, list=12%, signal=55%	5600/2002/7124/3460/4792/3459/2215/3586/3716/6772/3717/3592/4790/4615/5603/1535/2353/3676/3109/3654/9103/7040/653361/3108/4688/7099/3553/2209/4689/3115/7097/2212/3119/3118/3122/3123/3684/3111/3117/3127/718/2214/3689/3113/1536
hsa04640	Hematopoietic cell lineage	85	-0.761987644560063	-2.17654000414696	1e-10	9.67647058823529e-10	5.20123839009288e-10	2549	tags=58%, list=12%, signal=51%	1604/930/3554/7124/909/947/3690/911/7037/912/913/917/960/921/3559/945/952/3570/3575/3678/3676/3109/915/925/924/951/3108/1441/3553/3566/2209/916/1438/3115/920/290/914/3119/3118/3122/3123/3684/3111/1435/3117/929/3127/3113/1436
hsa05323	Rheumatoid arthritis	85	-0.762112549612354	-2.17689678269182	1e-10	9.67647058823529e-10	5.20123839009288e-10	1799	tags=51%, list=9%, signal=46%	528/3606/941/537/526/245973/1513/4050/6387/2919/1493/2353/6347/8741/8792/3600/1514/3109/414062/10673/7040/3108/7099/6348/3553/10312/54/3383/3115/7097/6352/942/3683/3119/3118/3122/3123/3111/1435/3117/3127/3689/3113
hsa05416	Viral myocarditis	55	-0.763200025793056	-2.10487050485225	1e-10	9.67647058823529e-10	5.20123839009288e-10	700	tags=42%, list=3%, signal=41%	3105/958/3109/3133/5551/3134/3107/3108/3106/5880/3383/3115/942/3683/3119/3118/3122/3123/3111/3117/3127/3689/3113
hsa05321	Inflammatory bowel disease	53	-0.785954253392652	-2.15483309198326	1e-10	9.67647058823529e-10	5.20123839009288e-10	2460	tags=70%, list=12%, signal=62%	7124/3460/7100/6774/2625/6775/3459/30009/3606/6778/4094/3586/6772/3592/4790/4772/64127/50615/50943/3109/7040/3594/3108/7099/3553/3566/3561/3115/7097/3119/3118/3122/3123/3111/3117/3127/3113
hsa05322	Systemic lupus erythematosus	46	-0.793683226461862	-2.13598024723523	1e-10	9.67647058823529e-10	5.20123839009288e-10	1906	tags=63%, list=9%, signal=57%	959/6737/941/2215/716/3586/958/717/721/3109/720/3108/2209/3115/942/2212/3119/3118/3122/3123/3111/3117/3127/712/718/2214/713/3113/714
hsa05340	Primary immunodeficiency	32	-0.823081916079386	-2.14161565162661	7.90570191738022e-10	6.04878123446068e-09	3.25130458291279e-09	2485	tags=75%, list=12%, signal=66%	926/930/84876/959/5993/8517/29760/29851/7535/3932/973/6891/958/3575/3718/915/925/6890/695/916/3561/920/5788/4261
hsa04672	Intestinal immune network for IgA production	39	-0.830637369688501	-2.21094350066995	1e-10	9.67647058823529e-10	5.20123839009288e-10	2204	tags=74%, list=11%, signal=67%	56477/959/9020/608/941/3586/29851/6387/8741/3600/958/3676/3109/10673/7040/3695/3108/3601/3115/942/3119/3118/3122/3123/3111/3117/3127/5284/3113
hsa04940	Type I diabetes mellitus	37	-0.835366644237996	-2.22150970273838	1e-10	9.67647058823529e-10	5.20123839009288e-10	1777	tags=68%, list=9%, signal=62%	941/355/3592/4049/356/3105/3002/3109/3133/5551/3134/3107/3108/3106/3553/3115/942/3119/3118/3122/3123/3111/3117/3127/3113
hsa05332	Graft-versus-host disease	32	-0.836126464356431	-2.1755568769321	1.12290857255127e-10	1.0555340581982e-09	5.67364331394327e-10	812	tags=66%, list=4%, signal=63%	356/3105/3002/3109/3133/5551/3134/3107/3108/3106/3553/3115/942/3119/3118/3122/3123/3111/3117/3127/3113
hsa05150	Staphylococcus aureus infection	61	-0.838502073341249	-2.32023011190461	1e-10	9.67647058823529e-10	5.20123839009288e-10	1809	tags=70%, list=9%, signal=64%	3075/2215/3866/716/3586/1672/629/25984/1675/717/721/3868/3109/720/9103/728/3108/2213/2209/3383/3115/2357/3683/2212/3119/3118/3122/5724/3123/3684/3111/3117/2359/3127/712/718/6404/719/2214/713/3689/3113/714
hsa05330	Allograft rejection	31	-0.840819124348795	-2.17985856936308	1e-10	9.67647058823529e-10	5.20123839009288e-10	1777	tags=81%, list=9%, signal=74%	941/355/3586/3592/356/3105/3002/958/3109/3133/5551/3134/3107/3108/3106/3115/942/3119/3118/3122/3123/3111/3117/3127/3113
hsa05320	Autoimmune thyroid disease	32	-0.853105677242325	-2.21973589163083	1e-10	9.67647058823529e-10	5.20123839009288e-10	1777	tags=78%, list=9%, signal=71%	941/355/3586/1493/356/3105/3002/958/3109/3133/5551/3134/3107/3108/3106/3115/942/3119/3118/3122/3123/3111/3117/3127/3113
hsa05310	Asthma	21	-0.858978403628601	-2.06998342547663	2.58329176964852e-08	1.69980598442873e-07	9.13669510107267e-08	2460	tags=86%, list=12%, signal=76%	7124/959/2205/6356/3586/958/3109/3108/2207/3115/3119/3118/3122/3123/3111/3117/3127/3113
