# Supplementary material for: Identifying the Role of Oxidative Stress-Related Genes as Prognostic Biomarkers and Predicting the Response of Immunotherapy and Chemotherapy in Ovarian Cancer
Source: Oxid Med Cell Longev. 2022 Dec 12;2022:6575534. doi: 10.1155/2022/6575534 (PMC9764017; doi:10.1155/2022/6575534)
Supplement: Supplementary 18 — Supplemental Table 17: difference in mutation frequency of driven genes between the high- and low-risk patients by Fisher's exact test. [file 6575534.f18.txt]

Hugo_Symbol	High-risk Group	Low-risk Group	pval
HMCN1	3	15	0.005732186
TRANK1	10	1	0.010152761
KAT6B	0	7	0.014410242
JAG1	0	6	0.029501284
TCOF1	0	6	0.029501284
DNAH2	2	9	0.060000739
NWD1	0	5	0.060154961
DIAPH1	0	5	0.060154961
CHRNB3	0	5	0.060154961
HTR3A	5	0	0.060154961
SLC26A8	1	7	0.066209222
RIMS4	1	7	0.066209222
LRP1B	14	6	0.101583195
FREM2	2	8	0.102743114
FAT3	9	18	0.102917304
PRRC2C	6	1	0.120047531
LRP2	5	12	0.1305198
PCLO	12	5	0.1305198
TENM2	3	9	0.136825269
CSMD1	4	10	0.16790799
ZHX3	2	7	0.172216435
CLTCL1	7	2	0.172216435
DNAH1	5	11	0.196043727
ZNF12	5	1	0.213423348
ELMSAN1	5	1	0.213423348
TNRC6A	5	1	0.213423348
DDR2	1	5	0.213423348
ANKRD30A	1	5	0.213423348
DNMBP	5	1	0.213423348
CELA2A	1	5	0.213423348
PCDHB5	1	5	0.213423348
NFATC2	1	5	0.213423348
PAPD7	1	5	0.213423348
CCR5	5	1	0.213423348
KCNJ1	5	1	0.213423348
CREBBP	8	3	0.216722781
MAP2	3	8	0.216722781
SYNE2	13	7	0.244516026
DNAH9	4	9	0.254784194
ZFHX3	4	9	0.254784194
ARID1B	4	9	0.254784194
ZAN	2	6	0.281562458
CASP8AP2	2	6	0.281562458
TNRC18	6	2	0.281562458
NBAS	2	6	0.281562458
USP26	2	6	0.281562458
LCT	10	5	0.287604093
RNF213	6	11	0.316170928
MYH13	3	7	0.33432085
IGSF1	3	7	0.33432085
SVEP1	4	8	0.376517805
AKAP6	4	8	0.376517805
VCAN	9	5	0.411161362
TOP2A	9	5	0.411161362
FRAS1	9	5	0.411161362
MYO7B	5	2	0.446862891
CDH16	2	5	0.446862891
DCTN1	5	2	0.446862891
PAPPA2	2	5	0.446862891
SUPT5H	2	5	0.446862891
SETD5	2	5	0.446862891
C5	2	5	0.446862891
ADAM29	5	2	0.446862891
TRIOBP	2	5	0.446862891
WNK3	2	5	0.446862891
PTGIS	5	2	0.446862891
EFCAB6	5	2	0.446862891
LINS	5	2	0.446862891
SYNM	5	2	0.446862891
TNC	3	6	0.500254504
DSP	3	6	0.500254504
GOLGB1	3	6	0.500254504
URB2	3	6	0.500254504
ADGRL3	3	6	0.500254504
KANK1	3	6	0.500254504
PREX2	3	6	0.500254504
VPS11	6	3	0.500254504
APOB	9	13	0.505106981
TTN	46	52	0.525181291
TP53	122	118	0.536379996
LAMA2	4	7	0.540117472
BIRC6	7	4	0.540117472
ABCA13	5	8	0.571291581
ZNF318	10	7	0.617395812
DNAH3	8	11	0.635066287
DNAH5	8	11	0.635066287
DNAH10	11	8	0.635066287
RYR2	12	15	0.685366317
IRS4	5	3	0.722363613
MADD	3	5	0.722363613
NAGLU	3	5	0.722363613
DMXL2	3	5	0.722363613
CHD8	3	5	0.722363613
NUP188	5	3	0.722363613
PODN	3	5	0.722363613
KIAA1549L	5	3	0.722363613
MGAM	3	5	0.722363613
EGFR	3	5	0.722363613
UTP20	3	5	0.722363613
PIK3CA	3	5	0.722363613
UNC13B	3	5	0.722363613
MYCBP2	6	4	0.749154984
SMG1	4	6	0.749154984
LPA	4	6	0.749154984
SMC1A	4	6	0.749154984
AIM1	7	5	0.769157005
NEB	5	7	0.769157005
PDZD2	5	7	0.769157005
APC	5	7	0.769157005
CACNA1S	5	7	0.769157005
LAMA1	5	7	0.769157005
DNAH17	9	7	0.797444842
MGA	8	10	0.807929625
KMT2C	12	11	1
USH2A	11	11	1
AKAP13	8	7	1
COL6A3	5	5	1
PLCH1	6	7	1
ZFHX4	7	7	1
CACNA1D	5	5	1
COL7A1	7	8	1
ZNF551	5	5	1
TSHZ3	7	7	1
PEG3	5	4	1
PRKDC	5	5	1
CNTNAP2	6	5	1
CMYA5	6	5	1
KIAA0195	5	6	1
DIDO1	5	5	1
TRPS1	5	6	1
ZBED1	5	4	1
HRNR	5	6	1
MYO5A	4	5	1
KIAA1462	4	5	1
